# Supplementary material for: Top-down machine learning approach for high-throughput single-molecule analysis
Source: eLife journal article supplement (doi:10.7554/elife.53357), 2020-04-08
Supplement: supp [file elife-53357-supp-v1.zip]

Archive with 17 entries (17 files):
- elife_poa_e53357_Figure_5_source_data_1.xlsx
- elife_poa_e53357_Transparent_Reporting_File.pdf
- elife_poa_e53357_Figure_5_figure_supplement_1.pdf
- elife_poa_e53357_Figure_5_figure_supplement_3.pdf
- elife_poa_e53357_Figure_3_figure_supplement_1.pdf
- elife_poa_e53357_Figure_4_source_data_1.xlsx
- elife_poa_e53357_Figure_5_figure_supplement_2.pdf
- elife_poa_e53357_Figure_3_figure_supplement_2.pdf
- elife_poa_e53357_Figure_4_figure_supplement_1.pdf
- elife_poa_e53357_Figure_1_figure_supplement_1.pdf
- elife_poa_e53357_Figure_3_source_data_1.xlsx
- elife_poa_e53357_Figure_3_figure_supplement_3.pdf
- elife_poa_e53357_Figure_1_source_data_1.xlsx
- elife_poa_e53357_Figure_5_figure_supplement_5.pdf
- elife_poa_e53357_Figure_2_figure_supplement_1.pdf
- elife_poa_e53357_Figure_2_source_data_1.xlsx
- elife_poa_e53357_Figure_5_figure_supplement_4.pdf
