# Supplementary material for: Top-down machine learning approach for high-throughput single-molecule analysis
Source: eLife journal article supplement (doi:10.7554/elife.53357), 2020-04-08
Supplement: supp [file elife-53357-supp-v1.zip › elife_poa_e53357_Figure_1_source_data_1.xlsx]

## Sheet: Figure 1 Trajectory
Frame	Simulated Intensity	True Fit	DISC Iteration 1	DISC Iteration 2	DISC Iteration 3	Final DISC Fit			Number of States	BIC Value
1	89.1	85.3328	67.6799	97.9701	85.6105	85.3328			1	1
2	77.6	85.3328	67.6799	97.9701	85.6105	85.3328			2	0.581539
3	91.6	85.3328	67.6799	97.9701	85.6105	85.3328			3	0.212551
4	75.7	85.3328	67.6799	97.9701	85.6105	85.3328			4	0
5	100.7	85.3328	67.6799	97.9701	85.6105	85.3328
6	70.3	85.3328	67.6799	97.9701	85.6105	85.3328
7	72	85.3328	67.6799	97.9701	85.6105	85.3328
8	83.7	85.3328	67.6799	97.9701	85.6105	85.3328
9	54.7	48.7272	67.6799	38.7145	48.6553	48.8479
10	57.8	48.7272	67.6799	38.7145	48.6553	48.8479
11	43.5	48.7272	67.6799	38.7145	48.6553	48.8479
12	70.6	48.7272	67.6799	38.7145	48.6553	48.8479
13	43.8	48.7272	67.6799	38.7145	48.6553	48.8479
14	22.4	48.7272	67.6799	38.7145	48.6553	48.8479
15	51	48.7272	67.6799	38.7145	48.6553	48.8479
16	36.1	48.7272	67.6799	38.7145	48.6553	48.8479
17	52.7	48.7272	67.6799	38.7145	48.6553	48.8479
18	31.6	48.7272	67.6799	38.7145	48.6553	48.8479
19	52.2	48.7272	67.6799	38.7145	48.6553	48.8479
20	68.3	48.7272	67.6799	38.7145	48.6553	48.8479
21	59.9	48.7272	67.6799	38.7145	48.6553	48.8479
22	46.9	48.7272	67.6799	38.7145	48.6553	48.8479
23	43.9	48.7272	67.6799	38.7145	48.6553	48.8479
24	42.4	48.7272	67.6799	38.7145	48.6553	48.8479
25	39.3	48.7272	67.6799	38.7145	48.6553	48.8479
26	39.7	48.7272	67.6799	38.7145	48.6553	48.8479
27	54.5	48.7272	67.6799	38.7145	48.6553	48.8479
28	53.7	48.7272	67.6799	38.7145	48.6553	48.8479
29	43.1	48.7272	67.6799	38.7145	48.6553	48.8479
30	43.2	48.7272	67.6799	38.7145	48.6553	48.8479
31	48	48.7272	67.6799	38.7145	48.6553	48.8479
32	48.2	48.7272	67.6799	38.7145	48.6553	48.8479
33	47.8	48.7272	67.6799	38.7145	48.6553	48.8479
34	52.3	48.7272	67.6799	38.7145	48.6553	48.8479
35	44.8	48.7272	67.6799	38.7145	48.6553	48.8479
36	48.5	48.7272	67.6799	38.7145	48.6553	48.8479
37	49.4	48.7272	67.6799	38.7145	48.6553	48.8479
38	55.6	48.7272	67.6799	38.7145	48.6553	48.8479
39	68.6	48.7272	67.6799	38.7145	48.6553	48.8479
40	50.5	48.7272	67.6799	38.7145	48.6553	48.8479
41	37.9	48.7272	67.6799	38.7145	48.6553	48.8479
42	10	21.7257	67.6799	38.7145	21.627	21.667
43	31.4	21.7257	67.6799	38.7145	21.627	21.667
44	31.8	21.7257	67.6799	38.7145	21.627	21.667
45	8.2	21.7257	67.6799	38.7145	21.627	21.667
46	20.7	21.7257	67.6799	38.7145	21.627	21.667
47	13.9	21.7257	67.6799	38.7145	21.627	21.667
48	5.3	21.7257	67.6799	38.7145	21.627	21.667
49	23.6	21.7257	67.6799	38.7145	21.627	21.667
50	19.2	21.7257	67.6799	38.7145	21.627	21.667
51	17.4	21.7257	67.6799	38.7145	21.627	21.667
52	12.3	21.7257	67.6799	38.7145	21.627	21.667
53	22.9	21.7257	67.6799	38.7145	21.627	21.667
54	21.9	21.7257	67.6799	38.7145	21.627	21.667
55	19.3	21.7257	67.6799	38.7145	21.627	21.667
56	17.4	21.7257	67.6799	38.7145	21.627	21.667
57	29.3	21.7257	67.6799	38.7145	48.6553	21.667
58	48	48.7272	67.6799	38.7145	48.6553	48.8479
59	48.5	48.7272	67.6799	38.7145	48.6553	48.8479
60	26	21.7257	67.6799	38.7145	21.627	21.667
61	20.4	21.7257	67.6799	38.7145	21.627	21.667
62	25.1	21.7257	67.6799	38.7145	21.627	21.667
63	19.3	21.7257	67.6799	38.7145	21.627	21.667
64	30.4	21.7257	67.6799	38.7145	21.627	21.667
65	25.2	21.7257	67.6799	38.7145	21.627	21.667
66	20.9	21.7257	67.6799	38.7145	21.627	21.667
67	15.1	21.7257	67.6799	38.7145	21.627	21.667
68	18.4	21.7257	67.6799	38.7145	21.627	21.667
69	36	21.7257	67.6799	38.7145	21.627	21.667
70	25.6	21.7257	67.6799	38.7145	21.627	21.667
71	27.1	21.7257	67.6799	38.7145	21.627	21.667
72	12	21.7257	67.6799	38.7145	21.627	21.667
73	24.8	21.7257	67.6799	38.7145	21.627	21.667
74	23.3	21.7257	67.6799	38.7145	21.627	21.667
75	19.6	21.7257	67.6799	38.7145	21.627	21.667
76	8.2	21.7257	67.6799	38.7145	21.627	21.667
77	33	21.7257	67.6799	38.7145	21.627	21.667
78	30.9	21.7257	67.6799	38.7145	21.627	21.667
79	20.7	21.7257	67.6799	38.7145	21.627	21.667
80	19.5	21.7257	67.6799	38.7145	21.627	21.667
81	28.2	21.7257	67.6799	38.7145	21.627	21.667
82	33.8	21.7257	67.6799	38.7145	21.627	21.667
83	16.7	21.7257	67.6799	38.7145	21.627	21.667
84	20.4	21.7257	67.6799	38.7145	21.627	21.667
85	23	21.7257	67.6799	38.7145	21.627	21.667
86	30.3	21.7257	67.6799	38.7145	21.627	21.667
87	25.5	21.7257	67.6799	38.7145	21.627	21.667
88	14.6	21.7257	67.6799	38.7145	21.627	21.667
89	8.9	21.7257	67.6799	38.7145	21.627	21.667
90	24.2	21.7257	67.6799	38.7145	21.627	21.667
91	13.5	21.7257	67.6799	38.7145	21.627	21.667
92	22.4	21.7257	67.6799	38.7145	21.627	21.667
93	20.3	21.7257	67.6799	38.7145	21.627	21.667
94	27.2	21.7257	67.6799	38.7145	21.627	21.667
95	20.3	21.7257	67.6799	38.7145	21.627	21.667
96	36.1	48.7272	67.6799	38.7145	48.6553	48.8479
97	36.3	48.7272	67.6799	38.7145	48.6553	48.8479
98	43.9	48.7272	67.6799	38.7145	48.6553	48.8479
99	52.9	48.7272	67.6799	38.7145	48.6553	48.8479
100	45.4	48.7272	67.6799	38.7145	48.6553	48.8479
101	46.9	48.7272	67.6799	38.7145	48.6553	48.8479
102	57	48.7272	67.6799	38.7145	48.6553	48.8479
103	48.7	48.7272	67.6799	38.7145	48.6553	48.8479
104	41.5	48.7272	67.6799	38.7145	48.6553	48.8479
105	83.8	85.3328	67.6799	97.9701	85.6105	85.3328
106	76.4	85.3328	67.6799	97.9701	85.6105	85.3328
107	98.8	85.3328	67.6799	97.9701	85.6105	85.3328
108	101.6	85.3328	67.6799	97.9701	85.6105	85.3328
109	92.4	85.3328	67.6799	97.9701	85.6105	85.3328
110	67.3	85.3328	67.6799	97.9701	85.6105	85.3328
111	79.1	85.3328	67.6799	97.9701	85.6105	85.3328
112	88.6	85.3328	67.6799	97.9701	85.6105	85.3328
113	72.3	85.3328	67.6799	97.9701	85.6105	85.3328
114	30.5	21.7257	67.6799	38.7145	21.627	21.667
115	28.8	21.7257	67.6799	38.7145	21.627	21.667
116	13.4	21.7257	67.6799	38.7145	21.627	21.667
117	21.5	21.7257	67.6799	38.7145	21.627	21.667
118	17.6	21.7257	67.6799	38.7145	21.627	21.667
119	22	21.7257	67.6799	38.7145	21.627	21.667
120	20.4	21.7257	67.6799	38.7145	21.627	21.667
121	3.1	21.7257	67.6799	38.7145	21.627	21.667
122	23.5	21.7257	67.6799	38.7145	21.627	21.667
123	11	21.7257	67.6799	38.7145	21.627	21.667
124	34	21.7257	67.6799	38.7145	21.627	21.667
125	63.9	48.7272	67.6799	38.7145	48.6553	48.8479
126	70.2	48.7272	67.6799	38.7145	48.6553	48.8479
127	60.4	48.7272	67.6799	38.7145	48.6553	48.8479
128	38.9	48.7272	67.6799	38.7145	48.6553	48.8479
129	57.9	48.7272	67.6799	38.7145	48.6553	48.8479
130	55.6	48.7272	67.6799	38.7145	48.6553	48.8479
131	50.7	48.7272	67.6799	38.7145	48.6553	48.8479
132	68	48.7272	67.6799	38.7145	48.6553	48.8479
133	44.7	48.7272	67.6799	38.7145	48.6553	48.8479
134	64	48.7272	67.6799	38.7145	48.6553	48.8479
135	46.7	48.7272	67.6799	38.7145	48.6553	48.8479
136	54.9	48.7272	67.6799	38.7145	48.6553	48.8479
137	59.9	48.7272	67.6799	38.7145	48.6553	48.8479
138	48.9	48.7272	67.6799	38.7145	48.6553	48.8479
139	36.9	48.7272	67.6799	38.7145	48.6553	48.8479
140	69.2	48.7272	67.6799	38.7145	48.6553	48.8479
141	50.8	48.7272	67.6799	38.7145	48.6553	48.8479
142	40.2	48.7272	67.6799	38.7145	48.6553	48.8479
143	55.9	48.7272	67.6799	38.7145	48.6553	48.8479
144	63.5	48.7272	67.6799	38.7145	48.6553	48.8479
145	48.4	48.7272	67.6799	38.7145	48.6553	48.8479
146	58.8	48.7272	67.6799	38.7145	48.6553	48.8479
147	53.4	48.7272	67.6799	38.7145	48.6553	48.8479
148	54.6	48.7272	67.6799	38.7145	48.6553	48.8479
149	47.2	48.7272	67.6799	38.7145	48.6553	48.8479
150	41.6	48.7272	67.6799	38.7145	48.6553	48.8479
151	33.4	48.7272	67.6799	38.7145	48.6553	48.8479
152	43.1	48.7272	67.6799	38.7145	48.6553	48.8479
153	44.1	48.7272	67.6799	38.7145	48.6553	48.8479
154	36.1	48.7272	67.6799	38.7145	48.6553	48.8479
155	41.9	48.7272	67.6799	38.7145	48.6553	48.8479
156	38.7	48.7272	67.6799	38.7145	48.6553	48.8479
157	58.7	48.7272	67.6799	38.7145	48.6553	48.8479
158	56.1	48.7272	67.6799	38.7145	48.6553	48.8479
159	41.9	48.7272	67.6799	38.7145	48.6553	48.8479
160	32	48.7272	67.6799	38.7145	48.6553	48.8479
161	49.5	48.7272	67.6799	38.7145	48.6553	48.8479
162	46.7	48.7272	67.6799	38.7145	48.6553	48.8479
163	52.8	48.7272	67.6799	38.7145	48.6553	48.8479
164	43.9	48.7272	67.6799	38.7145	48.6553	48.8479
165	60.1	48.7272	67.6799	38.7145	48.6553	48.8479
166	54.6	48.7272	67.6799	38.7145	48.6553	48.8479
167	53	48.7272	67.6799	38.7145	48.6553	48.8479
168	61.8	48.7272	67.6799	38.7145	48.6553	48.8479
169	57.1	48.7272	67.6799	38.7145	48.6553	48.8479
170	59.1	48.7272	67.6799	38.7145	48.6553	48.8479
171	66.9	48.7272	67.6799	38.7145	48.6553	48.8479
172	37.9	48.7272	67.6799	38.7145	48.6553	48.8479
173	58.2	48.7272	67.6799	97.9701	85.6105	48.8479
174	97.2	85.3328	67.6799	97.9701	85.6105	85.3328
175	87.5	85.3328	67.6799	97.9701	85.6105	85.3328
176	88.6	85.3328	67.6799	97.9701	85.6105	85.3328
177	92.1	85.3328	67.6799	97.9701	85.6105	85.3328
178	87.5	85.3328	67.6799	97.9701	85.6105	85.3328
179	81.1	85.3328	67.6799	97.9701	85.6105	85.3328
180	89	85.3328	67.6799	97.9701	85.6105	85.3328
181	83.8	85.3328	67.6799	97.9701	85.6105	85.3328
182	87.4	85.3328	67.6799	97.9701	85.6105	85.3328
183	82.7	85.3328	67.6799	97.9701	85.6105	85.3328
184	82.5	85.3328	67.6799	97.9701	85.6105	85.3328
185	69	85.3328	67.6799	97.9701	85.6105	85.3328
186	90.6	85.3328	67.6799	97.9701	85.6105	85.3328
187	87.1	85.3328	67.6799	97.9701	85.6105	85.3328
188	86	85.3328	67.6799	97.9701	85.6105	85.3328
189	42.5	48.7272	67.6799	38.7145	48.6553	48.8479
190	40.3	48.7272	67.6799	38.7145	48.6553	48.8479
191	44.6	48.7272	67.6799	38.7145	48.6553	48.8479
192	50.5	48.7272	67.6799	38.7145	48.6553	48.8479
193	47	48.7272	67.6799	38.7145	48.6553	48.8479
194	48.4	48.7272	67.6799	38.7145	48.6553	48.8479
195	48.3	48.7272	67.6799	38.7145	48.6553	48.8479
196	45.1	48.7272	67.6799	38.7145	48.6553	48.8479
197	61.4	48.7272	67.6799	38.7145	48.6553	48.8479
198	45.9	48.7272	67.6799	38.7145	48.6553	48.8479
199	64.6	48.7272	67.6799	38.7145	48.6553	48.8479
200	54.5	48.7272	67.6799	38.7145	48.6553	48.8479
201	53.4	48.7272	67.6799	38.7145	48.6553	48.8479
202	47.2	48.7272	67.6799	38.7145	48.6553	48.8479
203	44.7	48.7272	67.6799	38.7145	48.6553	48.8479
204	44.8	48.7272	67.6799	38.7145	48.6553	48.8479
205	56.4	48.7272	67.6799	38.7145	48.6553	48.8479
206	50	48.7272	67.6799	38.7145	48.6553	48.8479
207	36.9	48.7272	67.6799	38.7145	48.6553	48.8479
208	59	48.7272	67.6799	38.7145	48.6553	48.8479
209	59.3	48.7272	67.6799	38.7145	48.6553	48.8479
210	55.2	48.7272	67.6799	38.7145	48.6553	48.8479
211	53.2	48.7272	67.6799	38.7145	48.6553	48.8479
212	44.6	48.7272	67.6799	38.7145	48.6553	48.8479
213	55.2	48.7272	67.6799	38.7145	48.6553	48.8479
214	45.1	48.7272	67.6799	38.7145	48.6553	48.8479
215	41.6	48.7272	67.6799	38.7145	48.6553	48.8479
216	52.6	48.7272	67.6799	38.7145	48.6553	48.8479
217	58.7	48.7272	67.6799	38.7145	48.6553	48.8479
218	52.5	48.7272	67.6799	38.7145	48.6553	48.8479
219	40.7	48.7272	67.6799	38.7145	48.6553	48.8479
220	49.7	48.7272	67.6799	38.7145	48.6553	48.8479
221	74.6	85.3328	67.6799	97.9701	85.6105	85.3328
222	91.8	85.3328	67.6799	97.9701	85.6105	85.3328
223	79.2	85.3328	67.6799	97.9701	85.6105	85.3328
224	93.7	85.3328	67.6799	97.9701	85.6105	85.3328
225	80.3	85.3328	67.6799	97.9701	85.6105	85.3328
226	81.7	85.3328	67.6799	97.9701	85.6105	85.3328
227	71.4	85.3328	67.6799	97.9701	85.6105	85.3328
228	90.8	85.3328	67.6799	97.9701	85.6105	85.3328
229	98.1	85.3328	67.6799	97.9701	85.6105	85.3328
230	73.8	85.3328	67.6799	97.9701	85.6105	85.3328
231	74.9	85.3328	67.6799	97.9701	85.6105	85.3328
232	78.4	85.3328	67.6799	97.9701	85.6105	85.3328
233	85.8	85.3328	67.6799	97.9701	85.6105	85.3328
234	82.3	85.3328	67.6799	97.9701	85.6105	85.3328
235	106	117.225	67.6799	97.9701	117.402	117.225
236	120.1	117.225	67.6799	97.9701	117.402	117.225
237	120.1	117.225	67.6799	97.9701	117.402	117.225
238	115.7	117.225	67.6799	97.9701	117.402	117.225
239	108.9	117.225	67.6799	97.9701	117.402	117.225
240	108.5	117.225	67.6799	97.9701	117.402	117.225
241	107.6	117.225	67.6799	97.9701	117.402	117.225
242	114.9	117.225	67.6799	97.9701	117.402	117.225
243	115	117.225	67.6799	97.9701	117.402	117.225
244	119	117.225	67.6799	97.9701	117.402	117.225
245	110.8	117.225	67.6799	97.9701	117.402	117.225
246	96.2	117.225	67.6799	97.9701	85.6105	117.225
247	103.9	117.225	67.6799	97.9701	85.6105	117.225
248	121.6	117.225	67.6799	97.9701	117.402	117.225
249	119.6	117.225	67.6799	97.9701	117.402	117.225
250	122.5	117.225	67.6799	97.9701	117.402	117.225
251	131.5	117.225	67.6799	97.9701	117.402	117.225
252	117.5	117.225	67.6799	97.9701	117.402	117.225
253	120.8	117.225	67.6799	97.9701	117.402	117.225
254	113.7	117.225	67.6799	97.9701	117.402	117.225
255	118.6	117.225	67.6799	97.9701	117.402	117.225
256	127	117.225	67.6799	97.9701	117.402	117.225
257	115.8	117.225	67.6799	97.9701	117.402	117.225
258	121.9	117.225	67.6799	97.9701	117.402	117.225
259	119.9	117.225	67.6799	97.9701	117.402	117.225
260	127.7	117.225	67.6799	97.9701	117.402	117.225
261	116.7	117.225	67.6799	97.9701	117.402	117.225
262	122.4	117.225	67.6799	97.9701	117.402	117.225
263	121.8	117.225	67.6799	97.9701	117.402	117.225
264	126.7	117.225	67.6799	97.9701	117.402	117.225
265	121.1	117.225	67.6799	97.9701	117.402	117.225
266	109.7	117.225	67.6799	97.9701	117.402	117.225
267	104.4	117.225	67.6799	97.9701	117.402	117.225
268	129.3	117.225	67.6799	97.9701	117.402	117.225
269	113.9	117.225	67.6799	97.9701	117.402	117.225
270	121.9	117.225	67.6799	97.9701	117.402	117.225
271	112.3	117.225	67.6799	97.9701	117.402	117.225
272	112.5	117.225	67.6799	97.9701	117.402	117.225
273	116.9	117.225	67.6799	97.9701	117.402	117.225
274	112.6	117.225	67.6799	97.9701	117.402	117.225
275	103.5	117.225	67.6799	97.9701	117.402	117.225
276	129.2	117.225	67.6799	97.9701	117.402	117.225
277	108.3	117.225	67.6799	97.9701	117.402	117.225
278	127.7	117.225	67.6799	97.9701	117.402	117.225
279	110.2	117.225	67.6799	97.9701	117.402	117.225
280	103.4	117.225	67.6799	97.9701	117.402	117.225
281	117.8	117.225	67.6799	97.9701	117.402	117.225
282	106.7	117.225	67.6799	97.9701	117.402	117.225
283	109.2	117.225	67.6799	97.9701	117.402	117.225
284	108.4	117.225	67.6799	97.9701	117.402	117.225
285	120.6	117.225	67.6799	97.9701	117.402	117.225
286	114.3	117.225	67.6799	97.9701	117.402	117.225
287	115.2	117.225	67.6799	97.9701	117.402	117.225
288	127.4	117.225	67.6799	97.9701	117.402	117.225
289	131.2	117.225	67.6799	97.9701	117.402	117.225
290	133.5	117.225	67.6799	97.9701	117.402	117.225
291	113.2	117.225	67.6799	97.9701	117.402	117.225
292	112.9	117.225	67.6799	97.9701	117.402	117.225
293	118.2	117.225	67.6799	97.9701	117.402	117.225
294	105.6	117.225	67.6799	97.9701	117.402	117.225
295	109.7	117.225	67.6799	97.9701	117.402	117.225
296	113.5	117.225	67.6799	97.9701	117.402	117.225
297	108.6	117.225	67.6799	97.9701	117.402	117.225
298	121.3	117.225	67.6799	97.9701	117.402	117.225
299	96.1	85.3328	67.6799	97.9701	85.6105	85.3328
300	86.5	85.3328	67.6799	97.9701	85.6105	85.3328
301	101.6	85.3328	67.6799	97.9701	85.6105	85.3328
302	86.4	85.3328	67.6799	97.9701	85.6105	85.3328
303	72.8	85.3328	67.6799	97.9701	85.6105	85.3328
304	87.2	85.3328	67.6799	97.9701	85.6105	85.3328
305	76.1	85.3328	67.6799	97.9701	85.6105	85.3328
306	82.9	85.3328	67.6799	97.9701	85.6105	85.3328
307	78.1	85.3328	67.6799	97.9701	85.6105	85.3328
308	94.8	85.3328	67.6799	97.9701	85.6105	85.3328
309	96.6	85.3328	67.6799	97.9701	85.6105	85.3328
310	84.4	85.3328	67.6799	97.9701	85.6105	85.3328
311	85	85.3328	67.6799	97.9701	85.6105	85.3328
312	90.7	85.3328	67.6799	97.9701	85.6105	85.3328
313	78.2	85.3328	67.6799	97.9701	85.6105	85.3328
314	91.9	85.3328	67.6799	97.9701	85.6105	85.3328
315	84.2	85.3328	67.6799	97.9701	85.6105	85.3328
316	91	85.3328	67.6799	97.9701	85.6105	85.3328
317	82.8	85.3328	67.6799	97.9701	85.6105	85.3328
318	79.1	85.3328	67.6799	97.9701	85.6105	85.3328
319	75.9	85.3328	67.6799	97.9701	85.6105	85.3328
320	71.6	85.3328	67.6799	97.9701	85.6105	85.3328
321	72.9	85.3328	67.6799	97.9701	85.6105	85.3328
322	83.9	85.3328	67.6799	97.9701	85.6105	85.3328
323	80.9	85.3328	67.6799	97.9701	85.6105	85.3328
324	77.2	85.3328	67.6799	97.9701	85.6105	85.3328
325	100.3	85.3328	67.6799	97.9701	85.6105	85.3328
326	91.3	85.3328	67.6799	97.9701	85.6105	85.3328
327	77.5	85.3328	67.6799	97.9701	85.6105	85.3328
328	94.8	85.3328	67.6799	97.9701	85.6105	85.3328
329	85.5	85.3328	67.6799	97.9701	85.6105	85.3328
330	90.3	85.3328	67.6799	97.9701	85.6105	85.3328
331	95.4	85.3328	67.6799	97.9701	85.6105	85.3328
332	84.2	85.3328	67.6799	97.9701	85.6105	85.3328
333	77.7	85.3328	67.6799	97.9701	85.6105	85.3328
334	78.7	85.3328	67.6799	97.9701	85.6105	85.3328
335	65.2	85.3328	67.6799	97.9701	85.6105	85.3328
336	78.1	85.3328	67.6799	97.9701	85.6105	85.3328
337	81.7	85.3328	67.6799	97.9701	85.6105	85.3328
338	90.7	85.3328	67.6799	97.9701	85.6105	85.3328
339	92.2	85.3328	67.6799	97.9701	85.6105	85.3328
340	100.1	85.3328	67.6799	97.9701	85.6105	85.3328
341	77.1	85.3328	67.6799	97.9701	85.6105	85.3328
342	73.4	85.3328	67.6799	97.9701	85.6105	85.3328
343	84.6	85.3328	67.6799	97.9701	85.6105	85.3328
344	84.9	85.3328	67.6799	97.9701	85.6105	85.3328
345	76.6	85.3328	67.6799	97.9701	85.6105	85.3328
346	95	85.3328	67.6799	97.9701	85.6105	85.3328
347	84.2	85.3328	67.6799	97.9701	85.6105	85.3328
348	82.3	85.3328	67.6799	97.9701	85.6105	85.3328
349	94.7	85.3328	67.6799	97.9701	85.6105	85.3328
350	72.8	85.3328	67.6799	97.9701	85.6105	85.3328
351	79.3	85.3328	67.6799	97.9701	85.6105	85.3328
352	75	85.3328	67.6799	97.9701	85.6105	85.3328
353	90.5	85.3328	67.6799	97.9701	85.6105	85.3328
354	94.4	85.3328	67.6799	97.9701	85.6105	85.3328
355	82	85.3328	67.6799	97.9701	85.6105	85.3328
356	85.1	85.3328	67.6799	97.9701	85.6105	85.3328
357	88.4	85.3328	67.6799	97.9701	85.6105	85.3328
358	84.1	85.3328	67.6799	97.9701	85.6105	85.3328
359	67.7	85.3328	67.6799	97.9701	85.6105	85.3328
360	79.8	85.3328	67.6799	97.9701	85.6105	85.3328
361	92.7	85.3328	67.6799	97.9701	85.6105	85.3328
362	89.9	85.3328	67.6799	97.9701	85.6105	85.3328
363	74.5	85.3328	67.6799	97.9701	85.6105	85.3328
364	72.5	85.3328	67.6799	97.9701	85.6105	85.3328
365	82	85.3328	67.6799	97.9701	85.6105	85.3328
366	101.1	85.3328	67.6799	97.9701	85.6105	85.3328
367	90.4	85.3328	67.6799	97.9701	85.6105	85.3328
368	71.6	85.3328	67.6799	97.9701	85.6105	85.3328
369	78.9	85.3328	67.6799	97.9701	85.6105	85.3328
370	87.4	85.3328	67.6799	97.9701	85.6105	85.3328
371	71.3	85.3328	67.6799	97.9701	85.6105	85.3328
372	90	85.3328	67.6799	97.9701	85.6105	85.3328
373	82.6	85.3328	67.6799	97.9701	85.6105	85.3328
374	99.7	85.3328	67.6799	97.9701	85.6105	85.3328
375	79	85.3328	67.6799	97.9701	85.6105	85.3328
376	84.7	85.3328	67.6799	97.9701	85.6105	85.3328
377	75.1	85.3328	67.6799	97.9701	85.6105	85.3328
378	76.4	85.3328	67.6799	97.9701	85.6105	85.3328
379	81.7	85.3328	67.6799	97.9701	85.6105	85.3328
380	84.3	85.3328	67.6799	97.9701	85.6105	85.3328
381	77.6	85.3328	67.6799	97.9701	85.6105	85.3328
382	87.2	85.3328	67.6799	97.9701	85.6105	85.3328
383	89.5	85.3328	67.6799	97.9701	85.6105	85.3328
384	85.5	85.3328	67.6799	97.9701	85.6105	85.3328
385	83.4	85.3328	67.6799	97.9701	85.6105	85.3328
386	90.8	85.3328	67.6799	97.9701	85.6105	85.3328
387	86.9	85.3328	67.6799	97.9701	85.6105	85.3328
388	91.6	85.3328	67.6799	97.9701	85.6105	85.3328
389	83.6	85.3328	67.6799	97.9701	85.6105	85.3328
390	48.3	48.7272	67.6799	38.7145	48.6553	48.8479
391	44.4	48.7272	67.6799	38.7145	48.6553	48.8479
392	63	48.7272	67.6799	38.7145	48.6553	48.8479
393	63.7	48.7272	67.6799	38.7145	48.6553	48.8479
394	41.1	48.7272	67.6799	38.7145	48.6553	48.8479
395	42.1	48.7272	67.6799	38.7145	48.6553	48.8479
396	29.5	48.7272	67.6799	38.7145	48.6553	48.8479
397	50.9	48.7272	67.6799	38.7145	48.6553	48.8479
398	54.1	48.7272	67.6799	38.7145	48.6553	48.8479
399	56.1	48.7272	67.6799	38.7145	48.6553	48.8479
400	59.4	48.7272	67.6799	38.7145	48.6553	48.8479
401	42	48.7272	67.6799	38.7145	48.6553	48.8479
402	34.7	48.7272	67.6799	38.7145	48.6553	48.8479
403	44.4	48.7272	67.6799	38.7145	48.6553	48.8479
404	52	48.7272	67.6799	38.7145	48.6553	48.8479
405	62.9	48.7272	67.6799	38.7145	48.6553	48.8479
406	30.5	48.7272	67.6799	38.7145	48.6553	48.8479
407	47.4	48.7272	67.6799	38.7145	48.6553	48.8479
408	57.3	48.7272	67.6799	38.7145	48.6553	48.8479
409	53.9	48.7272	67.6799	38.7145	48.6553	48.8479
410	55.2	48.7272	67.6799	38.7145	48.6553	48.8479
411	62.2	48.7272	67.6799	38.7145	48.6553	48.8479
412	47.8	48.7272	67.6799	38.7145	48.6553	48.8479
413	48.5	48.7272	67.6799	38.7145	48.6553	48.8479
414	72	85.3328	67.6799	97.9701	85.6105	85.3328
415	90.8	85.3328	67.6799	97.9701	85.6105	85.3328
416	82.9	85.3328	67.6799	97.9701	85.6105	85.3328
417	103.7	85.3328	67.6799	97.9701	85.6105	85.3328
418	72.6	85.3328	67.6799	97.9701	85.6105	85.3328
419	98.5	85.3328	67.6799	97.9701	85.6105	85.3328
420	100.5	85.3328	67.6799	97.9701	85.6105	85.3328
421	84.5	85.3328	67.6799	97.9701	85.6105	85.3328
422	83.5	85.3328	67.6799	97.9701	85.6105	85.3328
423	97.3	85.3328	67.6799	97.9701	85.6105	85.3328
424	84.5	85.3328	67.6799	97.9701	85.6105	85.3328
425	74.4	85.3328	67.6799	97.9701	85.6105	85.3328
426	79.4	85.3328	67.6799	97.9701	85.6105	85.3328
427	91.3	85.3328	67.6799	97.9701	85.6105	85.3328
428	100.2	85.3328	67.6799	97.9701	85.6105	85.3328
429	81.6	85.3328	67.6799	97.9701	85.6105	85.3328
430	72.4	85.3328	67.6799	97.9701	85.6105	85.3328
431	100.3	85.3328	67.6799	97.9701	85.6105	85.3328
432	92.3	85.3328	67.6799	97.9701	85.6105	85.3328
433	82.3	85.3328	67.6799	97.9701	85.6105	85.3328
434	86.1	85.3328	67.6799	97.9701	85.6105	85.3328
435	78.4	85.3328	67.6799	97.9701	85.6105	85.3328
436	65.9	85.3328	67.6799	97.9701	85.6105	85.3328
437	86.4	85.3328	67.6799	97.9701	85.6105	85.3328
438	85	85.3328	67.6799	97.9701	85.6105	85.3328
439	86.9	85.3328	67.6799	97.9701	85.6105	85.3328
440	85.5	85.3328	67.6799	97.9701	85.6105	85.3328
441	52.8	48.7272	67.6799	38.7145	48.6553	48.8479
442	39.7	48.7272	67.6799	38.7145	48.6553	48.8479
443	48.2	48.7272	67.6799	38.7145	48.6553	48.8479
444	47.8	48.7272	67.6799	38.7145	48.6553	48.8479
445	58.2	48.7272	67.6799	38.7145	48.6553	48.8479
446	38.7	48.7272	67.6799	38.7145	48.6553	48.8479
447	55	48.7272	67.6799	38.7145	48.6553	48.8479
448	40.6	48.7272	67.6799	38.7145	48.6553	48.8479
449	54.3	48.7272	67.6799	38.7145	48.6553	48.8479
450	45.3	48.7272	67.6799	38.7145	48.6553	48.8479
451	47.7	48.7272	67.6799	38.7145	48.6553	48.8479
452	58.4	48.7272	67.6799	38.7145	48.6553	48.8479
453	48.1	48.7272	67.6799	38.7145	48.6553	48.8479
454	59.7	48.7272	67.6799	38.7145	48.6553	48.8479
455	43.7	48.7272	67.6799	38.7145	48.6553	48.8479
456	43.2	48.7272	67.6799	38.7145	48.6553	48.8479
457	52.6	48.7272	67.6799	38.7145	48.6553	48.8479
458	33	48.7272	67.6799	38.7145	48.6553	48.8479
459	83.8	85.3328	67.6799	97.9701	85.6105	85.3328
460	125	117.225	67.6799	97.9701	117.402	117.225
461	115.4	117.225	67.6799	97.9701	117.402	117.225
462	128.6	117.225	67.6799	97.9701	117.402	117.225
463	123.4	117.225	67.6799	97.9701	117.402	117.225
464	109.9	117.225	67.6799	97.9701	117.402	117.225
465	115.3	117.225	67.6799	97.9701	117.402	117.225
466	121.6	117.225	67.6799	97.9701	117.402	117.225
467	101.4	117.225	67.6799	97.9701	117.402	117.225
468	104	117.225	67.6799	97.9701	117.402	117.225
469	108.2	117.225	67.6799	97.9701	117.402	117.225
470	119.7	117.225	67.6799	97.9701	117.402	117.225
471	106.2	117.225	67.6799	97.9701	117.402	117.225
472	128.4	117.225	67.6799	97.9701	117.402	117.225
473	114.7	117.225	67.6799	97.9701	117.402	117.225
474	117.3	117.225	67.6799	97.9701	117.402	117.225
475	107.8	117.225	67.6799	97.9701	117.402	117.225
476	122.5	117.225	67.6799	97.9701	117.402	117.225
477	125.1	117.225	67.6799	97.9701	117.402	117.225
478	122.3	117.225	67.6799	97.9701	117.402	117.225
479	110.6	117.225	67.6799	97.9701	117.402	117.225
480	107.7	117.225	67.6799	97.9701	117.402	117.225
481	117.6	117.225	67.6799	97.9701	117.402	117.225
482	116.1	117.225	67.6799	97.9701	117.402	117.225
483	117.3	117.225	67.6799	97.9701	117.402	117.225
484	121.6	117.225	67.6799	97.9701	117.402	117.225
485	115.9	117.225	67.6799	97.9701	117.402	117.225
486	134	117.225	67.6799	97.9701	117.402	117.225
487	123.1	117.225	67.6799	97.9701	117.402	117.225
488	106.6	117.225	67.6799	97.9701	117.402	117.225
489	119	117.225	67.6799	97.9701	117.402	117.225
490	123.6	117.225	67.6799	97.9701	117.402	117.225
491	106.3	117.225	67.6799	97.9701	117.402	117.225
492	117	117.225	67.6799	97.9701	117.402	117.225
493	97.7	117.225	67.6799	97.9701	117.402	117.225
494	115.3	117.225	67.6799	97.9701	117.402	117.225
495	125.8	117.225	67.6799	97.9701	117.402	117.225
496	113.6	117.225	67.6799	97.9701	117.402	117.225
497	119.3	117.225	67.6799	97.9701	117.402	117.225
498	115.8	117.225	67.6799	97.9701	117.402	117.225
499	111.3	117.225	67.6799	97.9701	117.402	117.225
500	121.2	117.225	67.6799	97.9701	117.402	117.225
501	103.8	117.225	67.6799	97.9701	117.402	117.225
502	120.6	117.225	67.6799	97.9701	117.402	117.225
503	106.8	117.225	67.6799	97.9701	117.402	117.225
504	125.2	117.225	67.6799	97.9701	117.402	117.225
505	116.7	117.225	67.6799	97.9701	117.402	117.225
506	124.3	117.225	67.6799	97.9701	117.402	117.225
507	143.5	117.225	67.6799	97.9701	117.402	117.225
508	91.2	85.3328	67.6799	97.9701	85.6105	85.3328
509	104.6	85.3328	67.6799	97.9701	85.6105	85.3328
510	82.3	85.3328	67.6799	97.9701	85.6105	85.3328
511	91	85.3328	67.6799	97.9701	85.6105	85.3328
512	86.4	85.3328	67.6799	97.9701	85.6105	85.3328
513	89.3	85.3328	67.6799	97.9701	85.6105	85.3328
514	78	85.3328	67.6799	97.9701	85.6105	85.3328
515	74.3	85.3328	67.6799	97.9701	85.6105	85.3328
516	87.3	85.3328	67.6799	97.9701	85.6105	85.3328
517	59.2	48.7272	67.6799	38.7145	48.6553	48.8479
518	57.4	48.7272	67.6799	38.7145	48.6553	48.8479
519	54	48.7272	67.6799	38.7145	48.6553	48.8479
520	45.7	48.7272	67.6799	38.7145	48.6553	48.8479
521	44	48.7272	67.6799	38.7145	48.6553	48.8479
522	43.5	48.7272	67.6799	38.7145	48.6553	48.8479
523	88.4	85.3328	67.6799	97.9701	85.6105	85.3328
524	83.4	85.3328	67.6799	97.9701	85.6105	85.3328
525	80.6	85.3328	67.6799	97.9701	85.6105	85.3328
526	100.4	85.3328	67.6799	97.9701	85.6105	85.3328
527	85.2	85.3328	67.6799	97.9701	85.6105	85.3328
528	90.2	85.3328	67.6799	97.9701	85.6105	85.3328
529	105	85.3328	67.6799	97.9701	85.6105	85.3328
530	79.2	85.3328	67.6799	97.9701	85.6105	85.3328
531	89.1	85.3328	67.6799	97.9701	85.6105	85.3328
532	78.7	85.3328	67.6799	97.9701	85.6105	85.3328
533	87.5	85.3328	67.6799	97.9701	85.6105	85.3328
534	76.2	85.3328	67.6799	97.9701	85.6105	85.3328
535	79.6	85.3328	67.6799	97.9701	85.6105	85.3328
536	72.4	85.3328	67.6799	97.9701	85.6105	85.3328
537	84.8	85.3328	67.6799	97.9701	85.6105	85.3328
538	94.5	85.3328	67.6799	97.9701	85.6105	85.3328
539	81.3	85.3328	67.6799	97.9701	85.6105	85.3328
540	79	85.3328	67.6799	97.9701	85.6105	85.3328
541	84.4	85.3328	67.6799	97.9701	85.6105	85.3328
542	86.3	85.3328	67.6799	97.9701	85.6105	85.3328
543	92.7	85.3328	67.6799	97.9701	85.6105	85.3328
544	77.9	85.3328	67.6799	97.9701	85.6105	85.3328
545	85.4	85.3328	67.6799	97.9701	85.6105	85.3328
546	79.1	85.3328	67.6799	97.9701	85.6105	85.3328
547	91.3	85.3328	67.6799	97.9701	85.6105	85.3328
548	69.8	85.3328	67.6799	97.9701	85.6105	85.3328
549	97.1	85.3328	67.6799	97.9701	85.6105	85.3328
550	80.1	85.3328	67.6799	97.9701	85.6105	85.3328
551	81.8	85.3328	67.6799	97.9701	85.6105	85.3328
552	95.3	85.3328	67.6799	97.9701	85.6105	85.3328
553	90.9	85.3328	67.6799	97.9701	85.6105	85.3328
554	85.8	85.3328	67.6799	97.9701	85.6105	85.3328
555	79.7	85.3328	67.6799	97.9701	85.6105	85.3328
556	84.6	85.3328	67.6799	97.9701	85.6105	85.3328
557	86.3	85.3328	67.6799	97.9701	85.6105	85.3328
558	87.1	85.3328	67.6799	97.9701	85.6105	85.3328
559	86.4	85.3328	67.6799	97.9701	85.6105	85.3328
560	76.5	85.3328	67.6799	97.9701	85.6105	85.3328
561	73.9	85.3328	67.6799	97.9701	85.6105	85.3328
562	85.4	85.3328	67.6799	97.9701	85.6105	85.3328
563	86	85.3328	67.6799	97.9701	85.6105	85.3328
564	87.6	85.3328	67.6799	97.9701	85.6105	85.3328
565	76.6	85.3328	67.6799	97.9701	85.6105	85.3328
566	81.3	85.3328	67.6799	97.9701	85.6105	85.3328
567	84.5	85.3328	67.6799	97.9701	85.6105	85.3328
568	94.5	85.3328	67.6799	97.9701	85.6105	85.3328
569	87.3	85.3328	67.6799	97.9701	85.6105	85.3328
570	52.1	48.7272	67.6799	38.7145	48.6553	48.8479
571	59.1	48.7272	67.6799	38.7145	48.6553	48.8479
572	40.8	48.7272	67.6799	38.7145	48.6553	48.8479
573	57.3	48.7272	67.6799	38.7145	48.6553	48.8479
574	48.1	48.7272	67.6799	38.7145	48.6553	48.8479
575	44	48.7272	67.6799	38.7145	48.6553	48.8479
576	55.8	48.7272	67.6799	38.7145	48.6553	48.8479
577	50.3	48.7272	67.6799	38.7145	48.6553	48.8479
578	62.2	48.7272	67.6799	38.7145	48.6553	48.8479
579	35.9	48.7272	67.6799	38.7145	48.6553	48.8479
580	53.6	48.7272	67.6799	38.7145	48.6553	48.8479
581	47.4	48.7272	67.6799	38.7145	48.6553	48.8479
582	63.7	48.7272	67.6799	38.7145	48.6553	48.8479
583	32.9	48.7272	67.6799	38.7145	48.6553	48.8479
584	42.9	48.7272	67.6799	38.7145	48.6553	48.8479
585	37.9	48.7272	67.6799	38.7145	48.6553	48.8479
586	50	48.7272	67.6799	38.7145	48.6553	48.8479
587	37.3	48.7272	67.6799	38.7145	48.6553	48.8479
588	51	48.7272	67.6799	38.7145	48.6553	48.8479
589	45	48.7272	67.6799	38.7145	48.6553	48.8479
590	32.4	48.7272	67.6799	38.7145	48.6553	48.8479
591	52.5	48.7272	67.6799	38.7145	48.6553	48.8479
592	50.8	48.7272	67.6799	38.7145	48.6553	48.8479
593	46.5	48.7272	67.6799	38.7145	48.6553	48.8479
594	39.3	48.7272	67.6799	38.7145	48.6553	48.8479
595	49.8	48.7272	67.6799	38.7145	48.6553	48.8479
596	50	48.7272	67.6799	38.7145	48.6553	48.8479
597	49.4	48.7272	67.6799	38.7145	48.6553	48.8479
598	45.4	48.7272	67.6799	38.7145	48.6553	48.8479
599	37.4	48.7272	67.6799	38.7145	48.6553	48.8479
600	51.4	48.7272	67.6799	38.7145	48.6553	48.8479
601	57.4	48.7272	67.6799	38.7145	48.6553	48.8479
602	54.9	48.7272	67.6799	38.7145	48.6553	48.8479
603	62.5	48.7272	67.6799	38.7145	48.6553	48.8479
604	40.8	48.7272	67.6799	38.7145	48.6553	48.8479
605	39.8	48.7272	67.6799	38.7145	48.6553	48.8479
606	40.9	48.7272	67.6799	38.7145	48.6553	48.8479
607	53.4	48.7272	67.6799	38.7145	48.6553	48.8479
608	57.3	48.7272	67.6799	38.7145	48.6553	48.8479
609	42.7	48.7272	67.6799	38.7145	48.6553	48.8479
610	44.2	48.7272	67.6799	38.7145	48.6553	48.8479
611	48.7	48.7272	67.6799	38.7145	48.6553	48.8479
612	59.5	48.7272	67.6799	38.7145	48.6553	48.8479
613	49	48.7272	67.6799	38.7145	48.6553	48.8479
614	38.3	48.7272	67.6799	38.7145	48.6553	48.8479
615	44.8	48.7272	67.6799	38.7145	48.6553	48.8479
616	47.5	48.7272	67.6799	38.7145	48.6553	48.8479
617	44.8	48.7272	67.6799	38.7145	48.6553	48.8479
618	50.7	48.7272	67.6799	38.7145	48.6553	48.8479
619	39.5	48.7272	67.6799	38.7145	48.6553	48.8479
620	27.4	21.7257	67.6799	38.7145	21.627	21.667
621	6.5	21.7257	67.6799	38.7145	21.627	21.667
622	21.2	21.7257	67.6799	38.7145	21.627	21.667
623	14.7	21.7257	67.6799	38.7145	21.627	21.667
624	15.9	21.7257	67.6799	38.7145	21.627	21.667
625	23.6	21.7257	67.6799	38.7145	21.627	21.667
626	17.2	21.7257	67.6799	38.7145	21.627	21.667
627	25.2	21.7257	67.6799	38.7145	21.627	21.667
628	18.2	21.7257	67.6799	38.7145	21.627	21.667
629	19	21.7257	67.6799	38.7145	21.627	21.667
630	18	21.7257	67.6799	38.7145	21.627	21.667
631	23.4	21.7257	67.6799	38.7145	21.627	21.667
632	36.9	21.7257	67.6799	38.7145	21.627	21.667
633	34	21.7257	67.6799	38.7145	21.627	21.667
634	23.5	21.7257	67.6799	38.7145	21.627	21.667
635	17	21.7257	67.6799	38.7145	21.627	21.667
636	42.1	21.7257	67.6799	38.7145	21.627	21.667
637	14.3	21.7257	67.6799	38.7145	21.627	21.667
638	16.2	21.7257	67.6799	38.7145	21.627	21.667
639	19.3	21.7257	67.6799	38.7145	21.627	21.667
640	26.4	21.7257	67.6799	38.7145	21.627	21.667
641	17.5	21.7257	67.6799	38.7145	21.627	21.667
642	15.1	21.7257	67.6799	38.7145	21.627	21.667
643	26	21.7257	67.6799	38.7145	21.627	21.667
644	19.5	21.7257	67.6799	38.7145	21.627	21.667
645	31.7	21.7257	67.6799	38.7145	21.627	21.667
646	39.7	21.7257	67.6799	38.7145	21.627	21.667
647	28.9	21.7257	67.6799	38.7145	21.627	21.667
648	31.1	21.7257	67.6799	38.7145	21.627	21.667
649	10.6	21.7257	67.6799	38.7145	21.627	21.667
650	17.8	21.7257	67.6799	38.7145	21.627	21.667
651	42.9	21.7257	67.6799	38.7145	21.627	21.667
652	18.3	21.7257	67.6799	38.7145	21.627	21.667
653	21.4	21.7257	67.6799	38.7145	21.627	21.667
654	19.1	21.7257	67.6799	38.7145	21.627	21.667
655	19.9	21.7257	67.6799	38.7145	21.627	21.667
656	17.7	21.7257	67.6799	38.7145	21.627	21.667
657	12.6	21.7257	67.6799	38.7145	21.627	21.667
658	41.8	21.7257	67.6799	38.7145	21.627	21.667
659	20.4	21.7257	67.6799	38.7145	21.627	21.667
660	6.7	21.7257	67.6799	38.7145	21.627	21.667
661	13.6	21.7257	67.6799	38.7145	21.627	21.667
662	14.9	21.7257	67.6799	38.7145	21.627	21.667
663	39	48.7272	67.6799	38.7145	48.6553	48.8479
664	51.2	48.7272	67.6799	38.7145	48.6553	48.8479
665	53.9	48.7272	67.6799	38.7145	48.6553	48.8479
666	35.2	48.7272	67.6799	38.7145	48.6553	48.8479
667	44.9	48.7272	67.6799	38.7145	48.6553	48.8479
668	45.6	48.7272	67.6799	38.7145	48.6553	48.8479
669	58.5	48.7272	67.6799	38.7145	48.6553	48.8479
670	55.5	48.7272	67.6799	38.7145	48.6553	48.8479
671	45.2	48.7272	67.6799	38.7145	48.6553	48.8479
672	60.7	48.7272	67.6799	38.7145	48.6553	48.8479
673	55.4	48.7272	67.6799	38.7145	48.6553	48.8479
674	53.4	48.7272	67.6799	38.7145	48.6553	48.8479
675	31.9	48.7272	67.6799	38.7145	48.6553	48.8479
676	30.5	48.7272	67.6799	38.7145	48.6553	48.8479
677	54.7	48.7272	67.6799	38.7145	48.6553	48.8479
678	49.3	48.7272	67.6799	38.7145	48.6553	48.8479
679	55.2	48.7272	67.6799	38.7145	48.6553	48.8479
680	38.4	48.7272	67.6799	38.7145	48.6553	48.8479
681	40.3	48.7272	67.6799	38.7145	48.6553	48.8479
682	57.1	48.7272	67.6799	38.7145	48.6553	48.8479
683	50.3	48.7272	67.6799	38.7145	48.6553	48.8479
684	32.4	48.7272	67.6799	38.7145	48.6553	48.8479
685	44.1	48.7272	67.6799	38.7145	48.6553	48.8479
686	34.1	48.7272	67.6799	38.7145	48.6553	48.8479
687	46.1	48.7272	67.6799	38.7145	48.6553	48.8479
688	46.5	48.7272	67.6799	38.7145	48.6553	48.8479
689	48.5	48.7272	67.6799	38.7145	48.6553	48.8479
690	48.6	48.7272	67.6799	38.7145	48.6553	48.8479
691	40.1	48.7272	67.6799	38.7145	48.6553	48.8479
692	55.3	48.7272	67.6799	38.7145	48.6553	48.8479
693	48.2	48.7272	67.6799	38.7145	48.6553	48.8479
694	55.1	48.7272	67.6799	38.7145	48.6553	48.8479
695	46.3	48.7272	67.6799	38.7145	48.6553	48.8479
696	46.3	48.7272	67.6799	38.7145	48.6553	48.8479
697	44	48.7272	67.6799	38.7145	48.6553	48.8479
698	45.6	48.7272	67.6799	38.7145	48.6553	48.8479
699	56.5	48.7272	67.6799	38.7145	48.6553	48.8479
700	52.4	48.7272	67.6799	38.7145	48.6553	48.8479
701	21.8	21.7257	67.6799	38.7145	21.627	21.667
702	21.8	21.7257	67.6799	38.7145	21.627	21.667
703	33	21.7257	67.6799	38.7145	21.627	21.667
704	20.7	21.7257	67.6799	38.7145	21.627	21.667
705	17	21.7257	67.6799	38.7145	21.627	21.667
706	27.8	21.7257	67.6799	38.7145	21.627	21.667
707	43.5	21.7257	67.6799	38.7145	21.627	21.667
708	9	21.7257	67.6799	38.7145	21.627	21.667
709	35.7	21.7257	67.6799	38.7145	21.627	21.667
710	6.7	21.7257	67.6799	38.7145	21.627	21.667
711	17.5	21.7257	67.6799	38.7145	21.627	21.667
712	28.6	21.7257	67.6799	38.7145	21.627	21.667
713	13.5	21.7257	67.6799	38.7145	21.627	21.667
714	27.2	21.7257	67.6799	38.7145	21.627	21.667
715	19	21.7257	67.6799	38.7145	21.627	21.667
716	25	21.7257	67.6799	38.7145	21.627	21.667
717	8.7	21.7257	67.6799	38.7145	21.627	21.667
718	12.2	21.7257	67.6799	38.7145	21.627	21.667
719	24.6	21.7257	67.6799	38.7145	21.627	21.667
720	20.2	21.7257	67.6799	38.7145	21.627	21.667
721	27.7	21.7257	67.6799	38.7145	21.627	21.667
722	34.1	21.7257	67.6799	38.7145	21.627	21.667
723	37.4	21.7257	67.6799	38.7145	21.627	21.667
724	15	21.7257	67.6799	38.7145	21.627	21.667
725	26.5	21.7257	67.6799	38.7145	21.627	21.667
726	25.7	21.7257	67.6799	38.7145	21.627	21.667
727	24.3	21.7257	67.6799	38.7145	21.627	21.667
728	24.6	21.7257	67.6799	38.7145	21.627	21.667
729	21.8	21.7257	67.6799	38.7145	21.627	21.667
730	26.7	21.7257	67.6799	38.7145	21.627	21.667
731	20.9	21.7257	67.6799	38.7145	21.627	21.667
732	19	21.7257	67.6799	38.7145	21.627	21.667
733	29.6	21.7257	67.6799	38.7145	21.627	21.667
734	51.1	48.7272	67.6799	38.7145	48.6553	48.8479
735	35.6	48.7272	67.6799	38.7145	48.6553	48.8479
736	64.5	48.7272	67.6799	38.7145	48.6553	48.8479
737	71.1	85.3328	67.6799	38.7145	48.6553	85.3328
738	83.4	85.3328	67.6799	97.9701	85.6105	85.3328
739	95.4	85.3328	67.6799	97.9701	85.6105	85.3328
740	88.8	85.3328	67.6799	97.9701	85.6105	85.3328
741	124.8	117.225	67.6799	97.9701	85.6105	117.225
742	111	117.225	67.6799	97.9701	85.6105	117.225
743	90	85.3328	67.6799	97.9701	85.6105	85.3328
744	94.4	85.3328	67.6799	97.9701	85.6105	85.3328
745	88.3	85.3328	67.6799	97.9701	85.6105	85.3328
746	92.4	85.3328	67.6799	97.9701	85.6105	85.3328
747	90.5	85.3328	67.6799	97.9701	85.6105	85.3328
748	88.1	85.3328	67.6799	97.9701	85.6105	85.3328
749	89.8	85.3328	67.6799	97.9701	85.6105	85.3328
750	95.1	85.3328	67.6799	97.9701	85.6105	85.3328
751	62.8	85.3328	67.6799	97.9701	85.6105	85.3328
752	86.3	85.3328	67.6799	97.9701	85.6105	85.3328
753	78.9	85.3328	67.6799	97.9701	85.6105	85.3328
754	95.8	85.3328	67.6799	97.9701	85.6105	85.3328
755	77.7	85.3328	67.6799	97.9701	85.6105	85.3328
756	123.7	117.225	67.6799	97.9701	117.402	117.225
757	124	117.225	67.6799	97.9701	117.402	117.225
758	118.1	117.225	67.6799	97.9701	117.402	117.225
759	119.6	117.225	67.6799	97.9701	117.402	117.225
760	123.8	117.225	67.6799	97.9701	117.402	117.225
761	110.5	117.225	67.6799	97.9701	117.402	117.225
762	106.4	117.225	67.6799	97.9701	117.402	117.225
763	115.1	117.225	67.6799	97.9701	117.402	117.225
764	111	117.225	67.6799	97.9701	117.402	117.225
765	116.2	117.225	67.6799	97.9701	117.402	117.225
766	105	117.225	67.6799	97.9701	117.402	117.225
767	123.9	117.225	67.6799	97.9701	117.402	117.225
768	113.5	117.225	67.6799	97.9701	117.402	117.225
769	122.2	117.225	67.6799	97.9701	117.402	117.225
770	123.2	117.225	67.6799	97.9701	117.402	117.225
771	115.2	117.225	67.6799	97.9701	117.402	117.225
772	114.3	117.225	67.6799	97.9701	117.402	117.225
773	115.3	117.225	67.6799	97.9701	117.402	117.225
774	123.5	117.225	67.6799	97.9701	117.402	117.225
775	107	117.225	67.6799	97.9701	117.402	117.225
776	125.4	117.225	67.6799	97.9701	117.402	117.225
777	114.3	117.225	67.6799	97.9701	117.402	117.225
778	119.3	117.225	67.6799	97.9701	117.402	117.225
779	111.2	117.225	67.6799	97.9701	117.402	117.225
780	110	117.225	67.6799	97.9701	117.402	117.225
781	117.9	117.225	67.6799	97.9701	117.402	117.225
782	121.6	117.225	67.6799	97.9701	117.402	117.225
783	120.6	117.225	67.6799	97.9701	117.402	117.225
784	111.2	117.225	67.6799	97.9701	117.402	117.225
785	130.6	117.225	67.6799	97.9701	117.402	117.225
786	121.2	117.225	67.6799	97.9701	117.402	117.225
787	124.3	117.225	67.6799	97.9701	117.402	117.225
788	104.8	117.225	67.6799	97.9701	117.402	117.225
789	114.6	117.225	67.6799	97.9701	117.402	117.225
790	122.9	117.225	67.6799	97.9701	117.402	117.225
791	113.9	117.225	67.6799	97.9701	117.402	117.225
792	117.8	117.225	67.6799	97.9701	117.402	117.225
793	123.4	117.225	67.6799	97.9701	117.402	117.225
794	126.1	117.225	67.6799	97.9701	117.402	117.225
795	122.5	117.225	67.6799	97.9701	117.402	117.225
796	116.8	117.225	67.6799	97.9701	117.402	117.225
797	110.7	117.225	67.6799	97.9701	117.402	117.225
798	104.2	117.225	67.6799	97.9701	117.402	117.225
799	115.6	117.225	67.6799	97.9701	117.402	117.225
800	122	117.225	67.6799	97.9701	117.402	117.225
801	117.4	117.225	67.6799	97.9701	117.402	117.225
802	112.8	117.225	67.6799	97.9701	117.402	117.225
803	128.4	117.225	67.6799	97.9701	117.402	117.225
804	112.5	117.225	67.6799	97.9701	117.402	117.225
805	123.9	117.225	67.6799	97.9701	117.402	117.225
806	114.4	117.225	67.6799	97.9701	117.402	117.225
807	129.4	117.225	67.6799	97.9701	117.402	117.225
808	90.7	117.225	67.6799	97.9701	117.402	117.225
809	118.6	117.225	67.6799	97.9701	117.402	117.225
810	112.3	117.225	67.6799	97.9701	117.402	117.225
811	125.7	117.225	67.6799	97.9701	117.402	117.225
812	131.3	117.225	67.6799	97.9701	117.402	117.225
813	112.5	117.225	67.6799	97.9701	117.402	117.225
814	119.6	117.225	67.6799	97.9701	117.402	117.225
815	92.3	85.3328	67.6799	97.9701	85.6105	85.3328
816	50.3	48.7272	67.6799	38.7145	48.6553	48.8479
817	44.8	48.7272	67.6799	38.7145	48.6553	48.8479
818	39	48.7272	67.6799	38.7145	48.6553	48.8479
819	58	48.7272	67.6799	38.7145	48.6553	48.8479
820	46.7	48.7272	67.6799	38.7145	48.6553	48.8479
821	53	48.7272	67.6799	38.7145	48.6553	48.8479
822	49.5	48.7272	67.6799	38.7145	48.6553	48.8479
823	51.7	48.7272	67.6799	38.7145	48.6553	48.8479
824	36.3	48.7272	67.6799	38.7145	48.6553	48.8479
825	86.2	85.3328	67.6799	97.9701	85.6105	85.3328
826	97.2	85.3328	67.6799	97.9701	85.6105	85.3328
827	86.5	85.3328	67.6799	97.9701	85.6105	85.3328
828	82.3	85.3328	67.6799	97.9701	85.6105	85.3328
829	82.3	85.3328	67.6799	97.9701	85.6105	85.3328
830	92.4	85.3328	67.6799	97.9701	85.6105	85.3328
831	96.4	85.3328	67.6799	97.9701	85.6105	85.3328
832	87.5	85.3328	67.6799	97.9701	85.6105	85.3328
833	39	48.7272	67.6799	38.7145	48.6553	48.8479
834	56	48.7272	67.6799	38.7145	48.6553	48.8479
835	29.3	48.7272	67.6799	38.7145	48.6553	48.8479
836	53	48.7272	67.6799	38.7145	48.6553	48.8479
837	48.1	48.7272	67.6799	38.7145	48.6553	48.8479
838	49.8	48.7272	67.6799	38.7145	48.6553	48.8479
839	58.2	48.7272	67.6799	38.7145	48.6553	48.8479
840	48.7	48.7272	67.6799	38.7145	48.6553	48.8479
841	40.8	48.7272	67.6799	38.7145	48.6553	48.8479
842	55.7	48.7272	67.6799	38.7145	48.6553	48.8479
843	19.9	21.7257	67.6799	38.7145	21.627	21.667
844	15.2	21.7257	67.6799	38.7145	21.627	21.667
845	18	21.7257	67.6799	38.7145	21.627	21.667
846	7.9	21.7257	67.6799	38.7145	21.627	21.667
847	19.6	21.7257	67.6799	38.7145	21.627	21.667
848	32.9	21.7257	67.6799	38.7145	21.627	21.667
849	16.4	21.7257	67.6799	38.7145	21.627	21.667
850	33.5	21.7257	67.6799	38.7145	21.627	21.667
851	14.3	21.7257	67.6799	38.7145	21.627	21.667
852	33	21.7257	67.6799	38.7145	21.627	21.667
853	17.1	21.7257	67.6799	38.7145	21.627	21.667
854	21	21.7257	67.6799	38.7145	21.627	21.667
855	17	21.7257	67.6799	38.7145	21.627	21.667
856	14.4	21.7257	67.6799	38.7145	21.627	21.667
857	30.5	21.7257	67.6799	38.7145	21.627	21.667
858	29.5	21.7257	67.6799	38.7145	21.627	21.667
859	6.5	21.7257	67.6799	38.7145	21.627	21.667
860	17.8	21.7257	67.6799	38.7145	21.627	21.667
861	34.2	21.7257	67.6799	38.7145	21.627	21.667
862	25.3	21.7257	67.6799	38.7145	21.627	21.667
863	44	48.7272	67.6799	38.7145	48.6553	48.8479
864	49.3	48.7272	67.6799	38.7145	48.6553	48.8479
865	49.7	48.7272	67.6799	38.7145	48.6553	48.8479
866	46.7	48.7272	67.6799	38.7145	48.6553	48.8479
867	37	48.7272	67.6799	38.7145	48.6553	48.8479
868	106.9	85.3328	67.6799	97.9701	85.6105	85.3328
869	91.4	85.3328	67.6799	97.9701	85.6105	85.3328
870	83.5	85.3328	67.6799	97.9701	85.6105	85.3328
871	89.1	85.3328	67.6799	97.9701	85.6105	85.3328
872	84.4	85.3328	67.6799	97.9701	85.6105	85.3328
873	88	85.3328	67.6799	97.9701	85.6105	85.3328
874	93.2	85.3328	67.6799	97.9701	85.6105	85.3328
875	84.8	85.3328	67.6799	97.9701	85.6105	85.3328
876	97.3	85.3328	67.6799	97.9701	85.6105	85.3328
877	83.8	85.3328	67.6799	97.9701	85.6105	85.3328
878	81.1	85.3328	67.6799	97.9701	85.6105	85.3328
879	92.7	85.3328	67.6799	97.9701	85.6105	85.3328
880	73.1	85.3328	67.6799	97.9701	85.6105	85.3328
881	68.7	85.3328	67.6799	97.9701	85.6105	85.3328
882	86.7	85.3328	67.6799	97.9701	85.6105	85.3328
883	88.1	85.3328	67.6799	97.9701	85.6105	85.3328
884	90.2	85.3328	67.6799	97.9701	85.6105	85.3328
885	114.9	117.225	67.6799	97.9701	117.402	117.225
886	125.4	117.225	67.6799	97.9701	117.402	117.225
887	114.6	117.225	67.6799	97.9701	117.402	117.225
888	125.9	117.225	67.6799	97.9701	117.402	117.225
889	137.3	117.225	67.6799	97.9701	117.402	117.225
890	119.1	117.225	67.6799	97.9701	117.402	117.225
891	120	117.225	67.6799	97.9701	117.402	117.225
892	121.9	117.225	67.6799	97.9701	117.402	117.225
893	110.9	117.225	67.6799	97.9701	117.402	117.225
894	104.9	117.225	67.6799	97.9701	117.402	117.225
895	116.2	117.225	67.6799	97.9701	117.402	117.225
896	117.4	117.225	67.6799	97.9701	117.402	117.225
897	127	117.225	67.6799	97.9701	117.402	117.225
898	127.3	117.225	67.6799	97.9701	117.402	117.225
899	127.8	117.225	67.6799	97.9701	117.402	117.225
900	124.1	117.225	67.6799	97.9701	117.402	117.225
901	121	117.225	67.6799	97.9701	117.402	117.225
902	123.9	117.225	67.6799	97.9701	117.402	117.225
903	98.5	85.3328	67.6799	97.9701	85.6105	85.3328
904	89.3	85.3328	67.6799	97.9701	85.6105	85.3328
905	88.9	85.3328	67.6799	97.9701	85.6105	85.3328
906	79.4	85.3328	67.6799	97.9701	85.6105	85.3328
907	90.3	85.3328	67.6799	97.9701	85.6105	85.3328
908	99.1	85.3328	67.6799	97.9701	85.6105	85.3328
909	86.1	85.3328	67.6799	97.9701	85.6105	85.3328
910	88.8	85.3328	67.6799	97.9701	85.6105	85.3328
911	92.1	85.3328	67.6799	97.9701	85.6105	85.3328
912	83.9	85.3328	67.6799	97.9701	85.6105	85.3328
913	78.6	85.3328	67.6799	97.9701	85.6105	85.3328
914	74.3	85.3328	67.6799	97.9701	85.6105	85.3328
915	94.1	85.3328	67.6799	97.9701	85.6105	85.3328
916	45.8	48.7272	67.6799	38.7145	48.6553	48.8479
917	38.9	48.7272	67.6799	38.7145	48.6553	48.8479
918	48.1	48.7272	67.6799	38.7145	48.6553	48.8479
919	51.2	48.7272	67.6799	38.7145	48.6553	48.8479
920	45.7	48.7272	67.6799	38.7145	48.6553	48.8479
921	53.9	48.7272	67.6799	38.7145	48.6553	48.8479
922	89.2	85.3328	67.6799	97.9701	85.6105	85.3328
923	83.5	85.3328	67.6799	97.9701	85.6105	85.3328
924	85.7	85.3328	67.6799	97.9701	85.6105	85.3328
925	88.3	85.3328	67.6799	97.9701	85.6105	85.3328
926	93.9	85.3328	67.6799	97.9701	85.6105	85.3328
927	86.9	85.3328	67.6799	97.9701	85.6105	85.3328
928	79.3	85.3328	67.6799	97.9701	85.6105	85.3328
929	84.3	85.3328	67.6799	97.9701	85.6105	85.3328
930	81.3	85.3328	67.6799	97.9701	85.6105	85.3328
931	106.3	85.3328	67.6799	97.9701	85.6105	85.3328
932	89.4	85.3328	67.6799	97.9701	85.6105	85.3328
933	32.4	21.7257	67.6799	38.7145	48.6553	21.667
934	16.8	21.7257	67.6799	38.7145	21.627	21.667
935	21.4	21.7257	67.6799	38.7145	21.627	21.667
936	21	21.7257	67.6799	38.7145	21.627	21.667
937	15.4	21.7257	67.6799	38.7145	21.627	21.667
938	21.5	21.7257	67.6799	38.7145	21.627	21.667
939	30.2	21.7257	67.6799	38.7145	21.627	21.667
940	16.4	21.7257	67.6799	38.7145	21.627	21.667
941	21.4	21.7257	67.6799	38.7145	21.627	21.667
942	15.9	21.7257	67.6799	38.7145	21.627	21.667
943	6.2	21.7257	67.6799	38.7145	21.627	21.667
944	16.4	21.7257	67.6799	38.7145	21.627	21.667
945	33.1	21.7257	67.6799	38.7145	21.627	21.667
946	16.4	21.7257	67.6799	38.7145	21.627	21.667
947	21.5	21.7257	67.6799	38.7145	21.627	21.667
948	27.4	21.7257	67.6799	38.7145	21.627	21.667
949	7	21.7257	67.6799	38.7145	21.627	21.667
950	19.1	21.7257	67.6799	38.7145	21.627	21.667
951	18.8	21.7257	67.6799	38.7145	21.627	21.667
952	24	21.7257	67.6799	38.7145	21.627	21.667
953	28.3	21.7257	67.6799	38.7145	21.627	21.667
954	17.6	21.7257	67.6799	38.7145	21.627	21.667
955	14.3	21.7257	67.6799	38.7145	21.627	21.667
956	11	21.7257	67.6799	38.7145	21.627	21.667
957	30.7	21.7257	67.6799	38.7145	21.627	21.667
958	33.4	21.7257	67.6799	38.7145	21.627	21.667
959	18.1	21.7257	67.6799	38.7145	21.627	21.667
960	27.8	21.7257	67.6799	38.7145	21.627	21.667
961	50.3	48.7272	67.6799	38.7145	48.6553	48.8479
962	51.6	48.7272	67.6799	38.7145	48.6553	48.8479
963	55.4	48.7272	67.6799	38.7145	48.6553	48.8479
964	43.2	48.7272	67.6799	38.7145	48.6553	48.8479
965	49.9	48.7272	67.6799	38.7145	48.6553	48.8479
966	54.3	48.7272	67.6799	38.7145	48.6553	48.8479
967	40.5	48.7272	67.6799	38.7145	48.6553	48.8479
968	41.2	48.7272	67.6799	38.7145	48.6553	48.8479
969	88.8	85.3328	67.6799	97.9701	85.6105	85.3328
970	76.6	85.3328	67.6799	97.9701	85.6105	85.3328
971	33.5	48.7272	67.6799	38.7145	48.6553	48.8479
972	53.2	48.7272	67.6799	38.7145	48.6553	48.8479
973	46.2	48.7272	67.6799	38.7145	48.6553	48.8479
974	57.3	48.7272	67.6799	38.7145	48.6553	48.8479
975	68.4	48.7272	67.6799	38.7145	48.6553	48.8479
976	47.1	48.7272	67.6799	38.7145	48.6553	48.8479
977	10.7	48.7272	67.6799	38.7145	48.6553	21.667
978	52.5	48.7272	67.6799	38.7145	48.6553	48.8479
979	43.6	48.7272	67.6799	38.7145	48.6553	48.8479
980	65.9	48.7272	67.6799	38.7145	48.6553	48.8479
981	42.4	48.7272	67.6799	38.7145	48.6553	48.8479
982	54.4	48.7272	67.6799	38.7145	48.6553	48.8479
983	36.2	48.7272	67.6799	38.7145	48.6553	48.8479
984	48.4	48.7272	67.6799	38.7145	48.6553	48.8479
