# Supplementary material for: Top-down machine learning approach for high-throughput single-molecule analysis
Source: eLife journal article supplement (doi:10.7554/elife.53357), 2020-04-08
Supplement: supp [file elife-53357-supp-v1.zip › elife_poa_e53357_Figure_2_source_data_1.xlsx]

## Sheet: Figure 2a
Frame	Simulated Intensity (au)	CP Detection	Divisive Segmentation
1	1.97962	2.01575	2.01433
2	1.77358	2.01575	2.01433
3	2.0711	2.01575	2.01433
4	1.9174	2.01575	2.01433
5	2.20921	2.01575	2.01433
6	1.9772	2.01575	2.01433
7	1.76156	2.01575	2.01433
8	2.31435	2.01575	2.01433
9	2.26812	2.01575	2.01433
10	2.10026	2.01575	2.01433
11	1.81083	2.01575	2.01433
12	2.22846	2.01575	2.01433
13	1.88025	2.01575	2.01433
14	1.99823	2.01575	2.01433
15	1.9461	2.01575	2.01433
16	3.12893	3.03456	3.00365
17	3.30691	3.03456	3.00365
18	2.91426	3.03456	3.00365
19	2.93865	3.03456	3.00365
20	2.7118	3.03456	3.00365
21	3.16052	3.03456	3.00365
22	3.01905	3.03456	3.00365
23	2.94576	3.03456	3.00365
24	2.9724	3.03456	3.00365
25	3.17564	3.03456	3.00365
26	3.10622	3.03456	3.00365
27	3.57601	3.71799	4.00281
28	3.72452	3.71799	4.00281
29	3.76809	3.71799	4.00281
30	3.80335	3.71799	4.00281
31	4.09561	4.0275	4.00281
32	4.11547	4.0275	4.00281
33	4.16527	4.0275	4.00281
34	4.02264	4.0275	4.00281
35	4.18182	4.0275	4.00281
36	3.81202	4.0275	4.00281
37	3.82911	4.0275	4.00281
38	4.21129	4.0275	4.00281
39	3.51938	4.0275	4.00281
40	4.09765	4.0275	4.00281
41	3.96049	4.0275	4.00281
42	4.05907	4.0275	4.00281
43	4.16756	4.0275	4.00281
44	4.0562	4.0275	4.00281
45	4.08125	4.0275	4.00281
46	4.26224	4.0275	4.00281
47	3.86076	4.0275	4.00281
48	4.14393	4.0275	4.00281
49	3.62558	4.0275	4.00281
50	4.33828	4.0275	4.00281
51	4.03976	4.0275	4.00281
52	4.01462	4.0275	4.00281
53	4.02977	4.0275	4.00281
54	4.00661	4.0275	4.00281
55	4.22223	4.0275	4.00281
56	3.82734	4.0275	4.00281
57	4.07424	4.0275	4.00281
58	4.04307	4.0275	4.00281
59	3.86124	4.0275	4.00281
60	3.97071	4.0275	4.00281
61	4.29222	4.0275	4.00281
62	4.34647	4.0275	4.00281
63	3.98787	4.0275	4.00281
64	4.03253	4.0275	4.00281
65	3.97515	4.0275	4.00281
66	4.29157	4.0275	4.00281
67	3.8388	4.0275	4.00281
68	4.19719	4.0275	4.00281
69	4.07178	4.0275	4.00281
70	4.04495	4.0275	4.00281
71	4.22278	4.0275	4.00281
72	4.21848	4.0275	4.00281
73	3.87701	4.0275	4.00281
74	4.09113	4.0275	4.00281
75	4.20703	4.0275	4.00281
76	3.98232	4.0275	4.00281
77	4.13305	4.0275	4.00281
78	3.84864	4.0275	4.00281
79	4.09673	4.0275	4.00281
80	4.29917	4.0275	4.00281
81	4.17591	4.0275	4.00281
82	3.93479	4.0275	4.00281
83	3.66466	4.0275	4.00281
84	4.02255	4.0275	4.00281
85	3.45491	4.0275	4.00281
86	4.14699	4.0275	4.00281
87	3.97435	4.0275	4.00281
88	3.755	4.0275	4.00281
89	4.06958	4.0275	4.00281
90	4.20266	4.0275	4.00281
91	4.12405	4.0275	4.00281
92	4.43054	4.0275	4.00281
93	4.0347	4.0275	4.00281
94	4.45468	4.0275	4.00281
95	4.04495	4.0275	4.00281
96	4.07433	4.0275	4.00281
97	4.15116	4.0275	4.00281
98	3.91651	4.0275	4.00281
99	4.19654	4.0275	4.00281
100	4.1431	4.0275	4.00281
101	4.35185	4.0275	4.00281
102	3.91338	4.0275	4.00281
103	3.86521	4.0275	4.00281
104	3.95497	4.0275	4.00281
105	3.73198	4.0275	4.00281
106	3.80108	4.0275	4.00281
107	3.81354	4.0275	4.00281
108	4.2067	4.0275	4.00281
109	4.36588	4.0275	4.00281
110	4.35781	4.0275	4.00281
111	3.66812	4.0275	4.00281
112	4.22301	4.0275	4.00281
113	3.97543	4.0275	4.00281
114	4.30221	4.0275	4.00281
115	3.99832	4.0275	4.00281
116	4.28614	4.0275	4.00281
117	3.8318	4.0275	4.00281
118	3.75783	4.0275	4.00281
119	3.61511	4.0275	4.00281
120	4.11305	4.0275	4.00281
121	4.03629	4.0275	4.00281
122	4.05454	4.0275	4.00281
123	3.7864	4.0275	4.00281
124	4.04982	4.0275	4.00281
125	3.48482	4.0275	4.00281
126	3.64738	4.0275	4.00281
127	3.87166	4.0275	4.00281
128	4.09471	4.0275	4.00281
129	4.14787	4.0275	4.00281
130	4.04582	4.0275	4.00281
131	4.23336	4.0275	4.00281
132	4.11668	4.0275	4.00281
133	3.81356	4.0275	4.00281
134	4.09188	4.0275	4.00281
135	3.90143	4.0275	4.00281
136	3.93978	4.0275	4.00281
137	4.16749	4.0275	4.00281
138	3.80005	4.0275	4.00281
139	4.04302	4.0275	4.00281
140	4.01047	4.0275	4.00281
141	4.03672	4.0275	4.00281
142	3.84455	4.0275	4.00281
143	3.94399	4.0275	4.00281
144	4.0349	4.0275	4.00281
145	4.10768	4.0275	4.00281
146	4.25231	4.0275	4.00281
147	4.13567	4.0275	4.00281
148	3.84426	4.0275	4.00281
149	4.18565	4.0275	4.00281
150	3.60594	4.0275	4.00281
151	3.91955	4.0275	4.00281
152	3.73135	4.0275	4.00281
153	3.97698	4.0275	4.00281
154	3.76928	4.0275	4.00281
155	4.5067	4.0275	4.00281
156	3.87975	4.0275	4.00281
157	4.08275	4.0275	4.00281
158	4.1841	4.0275	4.00281
159	4.22464	4.0275	4.00281
160	4.12401	4.0275	4.00281
161	3.88091	4.0275	4.00281
162	4.17611	4.0275	4.00281
163	4.07683	4.0275	4.00281
164	4.37651	4.0275	4.00281
165	4.30353	4.0275	4.00281
166	4.02069	4.0275	4.00281
167	4.15438	4.0275	4.00281
168	3.89909	4.0275	4.00281
169	3.82743	4.0275	4.00281
170	3.70534	4.0275	4.00281
171	3.95426	4.0275	4.00281
172	3.82704	4.0275	4.00281
173	4.00756	4.0275	4.00281
174	4.24162	4.0275	4.00281
175	4.01674	4.0275	4.00281
176	3.976	4.0275	4.00281
177	4.01577	4.0275	4.00281
178	2.99868	2.92342	3.00365
179	2.69503	2.92342	3.00365
180	3.04839	2.92342	3.00365
181	2.70821	2.92342	3.00365
182	3.19907	2.92342	3.00365
183	2.67791	2.92342	3.00365
184	3.13667	2.92342	3.00365
185	2.35494	2.35494	3.00365
186	0.968101	1.09192	1.10028
187	1.1709	1.09192	1.10028
188	1.15353	1.09192	1.10028
189	1.07513	1.09192	1.10028
190	0.558067	0.771869	0.952304
191	0.835515	0.771869	0.952304
192	0.578223	0.771869	0.952304
193	0.823639	0.771869	0.952304
194	0.921146	0.771869	0.952304
195	0.6926	0.771869	0.952304
196	1.25943	0.771869	0.952304
197	0.502942	0.771869	0.952304
198	0.775256	0.771869	0.952304
199	2.03208	2.02486	2.01433
200	2.01579	2.02486	2.01433
201	1.80659	2.02486	2.01433
202	1.73087	2.02486	2.01433
203	2.42519	2.02486	2.01433
204	2.132	2.02486	2.01433
205	1.9813	2.02486	2.01433
206	2.14996	2.02486	2.01433
207	2.00948	2.02486	2.01433
208	1.72084	2.02486	2.01433
209	2.17716	2.02486	2.01433
210	1.91145	2.02486	2.01433
211	2.07291	2.02486	2.01433
212	1.73675	2.02486	2.01433
213	2.40486	2.02486	2.01433
214	2.07088	2.02486	2.01433
215	1.9053	2.02486	2.01433
216	1.89361	2.02486	2.01433
217	2.12	2.02486	2.01433
218	2.05078	2.02486	2.01433
219	2.12025	2.02486	2.01433
220	1.97752	2.02486	2.01433
221	1.84162	2.02486	2.01433
222	1.94225	2.02486	2.01433
223	2.39201	2.02486	2.01433
224	3.20128	3.05045	3.00365
225	3.21933	3.05045	3.00365
226	3.01358	3.05045	3.00365
227	3.37311	3.05045	3.00365
228	3.02719	3.05045	3.00365
229	2.94102	3.05045	3.00365
230	2.81649	3.05045	3.00365
231	2.85878	3.05045	3.00365
232	3.05597	3.05045	3.00365
233	2.75303	3.05045	3.00365
234	3.17851	3.05045	3.00365
235	3.17305	3.05045	3.00365
236	2.81285	3.05045	3.00365
237	2.82041	3.05045	3.00365
238	2.98208	3.05045	3.00365
239	3.35492	3.05045	3.00365
240	2.97279	3.05045	3.00365
241	2.9468	3.05045	3.00365
242	3.36431	3.05045	3.00365
243	3.14354	3.05045	3.00365
244	4.07292	4.10037	4.00281
245	3.91155	4.10037	4.00281
246	3.99605	4.10037	4.00281
247	3.98726	4.10037	4.00281
248	4.33001	4.10037	4.00281
249	3.89936	4.10037	4.00281
250	4.11302	4.10037	4.00281
251	4.13134	4.10037	4.00281
252	4.15425	4.10037	4.00281
253	4.05457	4.10037	4.00281
254	4.45371	4.10037	4.00281
255	3.43338	3.8823	4.00281
256	3.84439	3.8823	4.00281
257	4.08239	3.8823	4.00281
258	3.98155	3.8823	4.00281
259	4.14305	3.8823	4.00281
260	3.9299	3.8823	4.00281
261	4.00894	3.8823	4.00281
262	3.83709	3.8823	4.00281
263	3.69825	3.8823	4.00281
264	3.81691	3.8823	4.00281
265	3.9294	3.8823	4.00281
266	3.34187	3.34187	4.00281
267	3.92035	4.05075	4.00281
268	4.36549	4.05075	4.00281
269	4.16235	4.05075	4.00281
270	3.69128	4.05075	4.00281
271	3.78264	4.05075	4.00281
272	4.2608	4.05075	4.00281
273	4.0152	4.05075	4.00281
274	3.80911	4.05075	4.00281
275	4.31622	4.05075	4.00281
276	4.13671	4.05075	4.00281
277	4.15475	4.05075	4.00281
278	3.98504	4.05075	4.00281
279	4.08035	4.05075	4.00281
280	4.00666	4.05075	4.00281
281	4.12738	4.05075	4.00281
282	3.99771	4.05075	4.00281
283	3.73627	3.82908	4.00281
284	3.8556	3.82908	4.00281
285	3.85909	3.82908	4.00281
286	4.02446	3.82908	4.00281
287	3.66995	3.82908	4.00281
288	4.3409	4.11841	4.00281
289	3.98303	4.11841	4.00281
290	4.16213	4.11841	4.00281
291	3.98757	4.11841	4.00281
292	4.8137	4.94472	5.01557
293	4.7268	4.94472	5.01557
294	4.94868	4.94472	5.01557
295	4.78892	4.94472	5.01557
296	5.09315	4.94472	5.01557
297	5.15327	4.94472	5.01557
298	4.93758	4.94472	5.01557
299	5.22643	4.94472	5.01557
300	4.91902	4.94472	5.01557
301	5.07921	4.94472	5.01557
302	5.02567	4.94472	5.01557
303	4.67754	4.94472	5.01557
304	4.87286	4.94472	5.01557
305	4.49085	4.94472	5.01557
306	5.0143	4.94472	5.01557
307	5.33033	4.94472	5.01557
308	4.73172	4.94472	5.01557
309	4.81078	4.94472	5.01557
310	4.92465	4.94472	5.01557
311	5.05361	4.94472	5.01557
312	5.09178	4.94472	5.01557
313	5.14488	4.94472	5.01557
314	4.84145	4.94472	5.01557
315	4.86235	4.94472	5.01557
316	4.49483	4.94472	5.01557
317	5.39346	4.94472	5.01557
318	4.84494	4.94472	5.01557
319	4.94653	4.94472	5.01557
320	5.1139	4.94472	5.01557
321	4.9187	4.94472	5.01557
322	5.06154	4.94472	5.01557
323	4.609	4.94472	5.01557
324	5.35904	4.94472	5.01557
325	4.78373	4.94472	5.01557
326	5.13086	4.94472	5.01557
327	4.97317	4.94472	5.01557
328	4.95129	4.94472	5.01557
329	4.75894	4.94472	5.01557
330	5.21126	5.15797	5.01557
331	5.25529	5.15797	5.01557
332	4.82979	5.15797	5.01557
333	5.21876	5.15797	5.01557
334	5.29871	5.15797	5.01557
335	5.28279	5.15797	5.01557
336	5.0092	5.15797	5.01557
337	4.54429	4.79403	5.01557
338	4.87637	4.79403	5.01557
339	4.71136	4.79403	5.01557
340	4.91011	4.79403	5.01557
341	4.93186	4.79403	5.01557
342	4.7902	4.79403	5.01557
343	5.18392	5.15425	5.01557
344	5.03223	5.15425	5.01557
345	5.63991	5.15425	5.01557
346	5.23185	5.15425	5.01557
347	4.93918	5.15425	5.01557
348	4.99169	5.15425	5.01557
349	5.41807	5.15425	5.01557
350	4.83718	5.15425	5.01557
351	5.1142	5.15425	5.01557
352	4.2742	4.02594	4.00281
353	3.62514	4.02594	4.00281
354	3.94465	4.02594	4.00281
355	4.30611	4.02594	4.00281
356	4.08422	4.02594	4.00281
357	3.9001	4.02594	4.00281
358	4.01036	4.02594	4.00281
359	4.20277	4.02594	4.00281
360	3.63395	4.02594	4.00281
361	4.19059	4.02594	4.00281
362	3.87394	4.02594	4.00281
363	4.05398	4.02594	4.00281
364	4.18175	4.02594	4.00281
365	4.09256	4.02594	4.00281
366	4.16163	4.02594	4.00281
367	4.07729	4.02594	4.00281
368	4.31247	4.02594	4.00281
369	3.97992	4.02594	4.00281
370	3.86278	4.02594	4.00281
371	4.05283	4.02594	4.00281
372	3.91792	4.02594	4.00281
373	3.90785	4.02594	4.00281
374	3.48726	4.02594	4.00281
375	4.25325	4.02594	4.00281
376	3.94814	4.02594	4.00281
377	3.99169	4.02594	4.00281
378	3.95872	4.02594	4.00281
379	4.07218	4.02594	4.00281
380	4.06619	4.02594	4.00281
381	4.25374	4.02594	4.00281
382	3.9777	4.02594	4.00281
383	4.19084	4.02594	4.00281
384	4.37216	4.02594	4.00281
385	4.05043	4.02594	4.00281
386	4.40509	4.02594	4.00281
387	3.9256	4.02594	4.00281
388	4.13422	4.02594	4.00281
389	3.89984	4.02594	4.00281
390	3.94792	4.02594	4.00281
391	4.08009	4.02594	4.00281
392	4.27258	4.02594	4.00281
393	3.91034	4.02594	4.00281
394	3.58758	4.02594	4.00281
395	4.07564	4.02594	4.00281
396	3.76386	4.02594	4.00281
397	3.60364	4.02594	4.00281
398	3.69947	4.02594	4.00281
399	3.8315	4.02594	4.00281
400	3.97999	4.02594	4.00281
401	4.03663	4.02594	4.00281
402	4.07285	4.02594	4.00281
403	3.92595	4.02594	4.00281
404	3.84466	4.02594	4.00281
405	4.09348	4.02594	4.00281
406	4.01447	4.02594	4.00281
407	4.22073	4.02594	4.00281
408	4.11457	4.02594	4.00281
409	3.76714	4.02594	4.00281
410	4.05969	4.02594	4.00281
411	4.28193	4.02594	4.00281
412	3.94206	4.02594	4.00281
413	3.95269	4.02594	4.00281
414	4.18307	4.02594	4.00281
415	4.35481	4.02594	4.00281
416	4.02707	4.02594	4.00281
417	3.72789	4.02594	4.00281
418	3.94741	4.02594	4.00281
419	4.30425	4.02594	4.00281
420	4.09363	4.02594	4.00281
421	4.37958	4.02594	4.00281
422	4.15484	4.02594	4.00281
423	3.98143	4.02594	4.00281
424	3.69854	3.91073	4.00281
425	3.7895	3.91073	4.00281
426	3.95238	3.91073	4.00281
427	3.69719	3.91073	4.00281
428	4.00199	3.91073	4.00281
429	3.88825	3.91073	4.00281
430	3.8743	3.91073	4.00281
431	3.92222	3.91073	4.00281
432	3.9454	3.91073	4.00281
433	3.80133	3.91073	4.00281
434	3.87596	3.91073	4.00281
435	4.05003	3.91073	4.00281
436	3.94891	3.91073	4.00281
437	4.15834	3.91073	4.00281
438	3.9493	3.91073	4.00281
439	4.04202	3.91073	4.00281
440	3.88674	3.91073	4.00281
441	5.20403	5.00201	5.01557
442	4.81633	5.00201	5.01557
443	5.0792	5.00201	5.01557
444	5.17638	5.00201	5.01557
445	4.95993	5.00201	5.01557
446	5.17951	5.00201	5.01557
447	5.06531	5.00201	5.01557
448	5.0373	5.00201	5.01557
449	4.738	5.00201	5.01557
450	4.96653	5.00201	5.01557
451	4.87958	5.00201	5.01557
452	4.8296	5.00201	5.01557
453	5.23833	5.00201	5.01557
454	4.87648	5.00201	5.01557
455	5.10757	5.00201	5.01557
456	5.37064	5.00201	5.01557
457	4.72968	5.00201	5.01557
458	5.02284	5.00201	5.01557
459	4.6442	5.00201	5.01557
460	5.11505	5.00201	5.01557
461	4.92494	5.00201	5.01557
462	5.16051	5.00201	5.01557
463	4.86788	5.00201	5.01557
464	5.08099	5.00201	5.01557
465	4.94242	5.00201	5.01557
466	5.0137	5.00201	5.01557
467	5.02734	5.00201	5.01557
468	5.31928	5.11472	5.01557
469	4.92989	5.11472	5.01557
470	5.18845	5.11472	5.01557
471	5.05384	5.11472	5.01557
472	5.39722	5.11472	5.01557
473	5.14778	5.11472	5.01557
474	5.14033	5.11472	5.01557
475	4.9958	5.11472	5.01557
476	4.87122	5.11472	5.01557
477	5.22158	5.11472	5.01557
478	4.89826	5.11472	5.01557
479	5.12968	5.11472	5.01557
480	4.75166	5.11472	5.01557
481	5.01731	5.11472	5.01557
482	5.24841	5.11472	5.01557
483	5.11331	5.11472	5.01557
484	5.00888	5.11472	5.01557
485	5.12157	5.11472	5.01557
486	5.19498	5.11472	5.01557
487	5.14431	5.11472	5.01557
488	5.2351	5.11472	5.01557
489	5.33468	5.11472	5.01557
490	5.09982	5.11472	5.01557
491	4.9295	5.11472	5.01557
492	5.49214	5.11472	5.01557
493	5.09283	5.11472	5.01557
494	5.34773	5.11472	5.01557
495	5.38853	5.11472	5.01557
496	4.85995	5.11472	5.01557
497	4.69863	5.11472	5.01557
498	5.20216	5.11472	5.01557
499	5.11878	5.11472	5.01557

## Sheet: Figure 2b
Total States Found						Analysis Time (s)
Summary						Summary
	CP Detection	CP-HAC	Divisive Segmentation	DISC			CP Detection	CP-HAC	Divisive Segmentation	DISC
mu	47.21	5.006	5.712	4.982		mu	0.00171896	0.0504917	0.0165581	0.0174741
s.d.	8.38036	0.184478	0.725333	0.133084		s.d.	0.000581051	0.0151049	0.00723945	0.00333565
Raw Data						Raw Data
	CP Detection	CP-HAC	Divisive Segmentation	DISC			CP Detection	CP-HAC	Divisive Segmentation	DISC
	41	5	6	5			0.00547925	0.0475739	0.141531	0.0254478
	39	5	5	5			0.00170126	0.0387326	0.0369974	0.0183402
	55	5	6	5			0.00166121	0.0630853	0.0157571	0.0227791
	53	6	6	5			0.00155548	0.0669312	0.0217133	0.0215847
	51	5	6	5			0.00379348	0.0572603	0.0214136	0.0257551
	48	5	7	5			0.00214341	0.047629	0.0369613	0.0246498
	50	5	6	5			0.00139534	0.0553213	0.0294121	0.0188874
	54	5	7	5			0.00131256	0.0582407	0.0319756	0.0219012
	50	5	7	5			0.0013164	0.0558606	0.0391784	0.0237209
	55	5	5	5			0.0013167	0.0642981	0.0272871	0.0160279
	40	4	5	4			0.00112681	0.0383677	0.0196734	0.0144012
	46	5	5	5			0.00148224	0.0444435	0.0213886	0.0146975
	50	5	5	5			0.00162387	0.054754	0.0217873	0.0154319
	48	5	5	5			0.00128017	0.0505321	0.0154786	0.0114573
	39	5	5	5			0.00109355	0.0386735	0.0205604	0.0136909
	49	5	6	5			0.00121708	0.0497884	0.0234099	0.019336
	41	5	5	5			0.00108659	0.0377162	0.0202464	0.0137202
	47	5	6	5			0.00170445	0.048421	0.0162026	0.019237
	38	5	6	5			0.00225151	0.0336607	0.0262261	0.0200515
	42	5	6	5			0.00169909	0.0424706	0.0271911	0.0228398
	48	5	6	5			0.00165442	0.0517696	0.0157972	0.0166332
	58	5	5	5			0.00159266	0.0709252	0.0226355	0.0169649
	46	5	6	5			0.00199255	0.0458125	0.0203656	0.0156982
	48	5	5	5			0.00186748	0.0541439	0.0235255	0.0156473
	49	5	6	5			0.00161736	0.0568731	0.02177	0.0223774
	33	5	5	5			0.00100887	0.0270307	0.0168833	0.0148073
	33	5	7	5			0.00103519	0.0269371	0.0303444	0.0210098
	44	5	6	5			0.00115422	0.0416328	0.0169083	0.013729
	42	5	6	5			0.00120952	0.0432363	0.01744	0.0169
	45	5	5	5			0.00132428	0.0447942	0.0231868	0.0193057
	43	5	6	5			0.00133692	0.0411051	0.0217113	0.0176866
	61	5	6	5			0.00161305	0.081243	0.0196156	0.017389
	46	5	5	5			0.00138348	0.0471932	0.0203056	0.015054
	40	5	5	5			0.00115475	0.0359108	0.0163807	0.0119623
	52	5	6	5			0.00174496	0.0584627	0.0190755	0.0185497
	33	5	7	5			0.00177235	0.0362038	0.0279388	0.0200967
	42	5	6	5			0.00128779	0.0500103	0.0212088	0.0189122
	47	5	5	5			0.00119491	0.0585199	0.0143466	0.0143818
	43	5	7	5			0.00111631	0.0461273	0.018366	0.0189447
	56	5	5	5			0.00131794	0.0723185	0.0106541	0.0128239
	32	5	6	5			0.000971175	0.0302136	0.0126676	0.0148851
	45	5	6	5			0.00113455	0.0486348	0.0130435	0.0155525
	41	5	6	5			0.00108592	0.0440195	0.0152409	0.0172676
	38	5	6	5			0.00104521	0.0378407	0.0137843	0.0188784
	42	5	6	5			0.00109621	0.0396796	0.0179685	0.0184575
	43	5	6	5			0.00112009	0.0399323	0.0143441	0.0174094
	47	5	6	5			0.00117635	0.0481363	0.0146137	0.0182281
	47	5	6	5			0.00116584	0.0486317	0.0156078	0.0178878
	43	5	5	5			0.00133219	0.0438711	0.0128546	0.0147858
	42	6	5	5			0.00240116	0.0386871	0.0118643	0.0142007
	50	5	6	5			0.00268936	0.0603349	0.0170769	0.0181164
	33	5	7	5			0.00182237	0.0271182	0.0149322	0.0172391
	42	5	6	5			0.00158362	0.0396386	0.0148152	0.0172177
	36	4	5	4			0.00132646	0.0297513	0.011612	0.012975
	52	5	6	5			0.00126953	0.0601185	0.0155563	0.0180601
	41	5	5	5			0.0010926	0.0407228	0.0134282	0.0173456
	52	5	5	5			0.00134767	0.0555931	0.0128508	0.0155239
	53	5	6	5			0.00131723	0.06032	0.0127783	0.0145972
	45	5	7	5			0.00122767	0.047965	0.017151	0.0208982
	43	5	5	5			0.00117617	0.0411404	0.010842	0.0132884
	40	5	6	5			0.00108986	0.0360784	0.0130621	0.0162492
	33	5	5	5			0.00101103	0.0262255	0.0107498	0.0131069
	44	5	6	5			0.0011786	0.040973	0.0161797	0.0204237
	46	5	6	5			0.00118687	0.0456973	0.0150124	0.0174718
	67	5	6	5			0.00159563	0.0942732	0.018782	0.0216765
	38	5	6	5			0.00129721	0.0365451	0.0218579	0.0165632
	48	5	7	5			0.00128232	0.0503154	0.0223904	0.0166078
	59	5	5	5			0.0015372	0.0707533	0.0219464	0.0156807
	34	5	6	5			0.00137792	0.031693	0.0238153	0.0164692
	45	5	7	5			0.00142683	0.0436395	0.0300501	0.0249079
	49	5	6	5			0.00185022	0.0547301	0.0167254	0.0176948
	45	5	6	5			0.00165728	0.0500582	0.0230113	0.0246663
	56	5	6	5			0.00164484	0.0615101	0.0249965	0.0282638
	33	5	5	5			0.00119028	0.0270045	0.0193792	0.0250815
	49	5	6	5			0.00175675	0.0572926	0.0191676	0.0199249
	39	5	5	5			0.001321	0.0428979	0.0154701	0.0252636
	46	5	5	5			0.00154767	0.0453027	0.013091	0.0198335
	50	5	6	5			0.00151205	0.0505236	0.0162097	0.0242221
	60	5	5	5			0.00167676	0.0751123	0.0142869	0.0203115
	65	5	5	5			0.00177383	0.081968	0.0172417	0.0250409
	49	5	5	5			0.0015052	0.0507955	0.0133308	0.0178022
	33	5	5	5			0.00121746	0.0272156	0.010708	0.0141283
	51	6	5	5			0.00161727	0.0516722	0.0148392	0.0154406
	70	5	5	5			0.00378534	0.0934149	0.0163935	0.0169716
	46	5	6	5			0.00224419	0.0486364	0.0132416	0.0145723
	52	5	5	5			0.00253235	0.054101	0.0115497	0.0136318
	51	5	6	5			0.00250639	0.0519635	0.0135131	0.0171793
	51	5	5	5			0.00180933	0.0565193	0.0136396	0.0151395
	43	5	5	5			0.00326077	0.041526	0.0127443	0.0155396
	51	5	5	5			0.00247662	0.0533725	0.0131337	0.0155533
	62	5	5	5			0.00277869	0.0728471	0.0122564	0.0150055
	33	5	6	5			0.00198292	0.0272865	0.0140801	0.0176877
	53	4	5	4			0.00168276	0.0556472	0.0125653	0.0128415
	55	5	5	5			0.00156076	0.0598099	0.0152278	0.0206064
	57	5	6	5			0.00157019	0.0633134	0.017477	0.0221679
	47	5	6	5			0.00143514	0.0482923	0.0172564	0.020984
	47	5	6	5			0.00166483	0.0495042	0.0206006	0.0164926
	52	5	5	5			0.00225009	0.060338	0.0163444	0.0157715
	52	5	6	5			0.00221409	0.0553678	0.020245	0.0174141
	51	5	5	5			0.00201481	0.0516385	0.0125997	0.0171351
	37	5	6	5			0.0020087	0.0319251	0.011285	0.0144693
	56	5	7	5			0.00257733	0.0626846	0.0175431	0.0206587
	35	5	5	5			0.00192243	0.0358188	0.00989836	0.0123898
	37	5	5	5			0.00189738	0.0313132	0.0114719	0.013948
	52	5	5	5			0.00192157	0.0536566	0.0124892	0.0145105
	33	5	7	5			0.00123545	0.0269541	0.0155452	0.021143
	46	5	6	5			0.00147452	0.0507739	0.0132937	0.0166237
	46	5	7	5			0.001491	0.0465531	0.0147064	0.0172103
	39	6	5	5			0.00213419	0.0340585	0.0166144	0.0156339
	48	5	6	5			0.00241353	0.0480376	0.0164068	0.0221092
	54	5	6	5			0.0024058	0.0571774	0.0144427	0.017114
	55	5	6	5			0.00233381	0.065853	0.0117698	0.014383
	48	5	5	5			0.00230822	0.0483267	0.012638	0.0145086
	35	5	5	5			0.00205483	0.0336185	0.0102479	0.0127017
	43	5	7	5			0.00314339	0.039475	0.0161471	0.0183589
	61	5	5	5			0.0027123	0.0754132	0.0149618	0.0161691
	57	5	5	5			0.00263808	0.0613295	0.0123167	0.0154026
	49	5	6	5			0.00235096	0.0515528	0.0143247	0.0195544
	50	5	6	5			0.00262469	0.0553304	0.0140644	0.018718
	60	5	5	5			0.00279184	0.0677956	0.0138978	0.015375
	31	5	6	5			0.00187509	0.0244361	0.0107489	0.014964
	55	6	5	5			0.00258484	0.0583328	0.0198985	0.0183112
	47	5	6	5			0.00238638	0.051499	0.0149496	0.0195411
	42	5	5	5			0.00242244	0.0395577	0.012372	0.0170078
	45	5	6	5			0.00253192	0.0448693	0.0144386	0.0195899
	50	5	6	5			0.00260052	0.0506847	0.0118163	0.0141041
	56	5	5	5			0.00263345	0.0618802	0.010071	0.0123935
	40	5	5	5			0.00214199	0.0416522	0.0147499	0.0158785
	61	5	5	5			0.00268555	0.0725131	0.0151878	0.0231679
	57	5	7	5			0.00262369	0.0629766	0.0186728	0.0241529
	35	5	6	5			0.00204328	0.0284799	0.0160719	0.0179711
	47	5	5	5			0.00230988	0.0530488	0.0159395	0.0161374
	49	5	5	5			0.00261637	0.0507783	0.0162111	0.0134189
	31	5	6	5			0.00184909	0.0269621	0.0190889	0.017129
	47	5	5	5			0.00226877	0.045858	0.0220919	0.0152152
	52	5	5	5			0.00206511	0.0561707	0.0212295	0.0145117
	47	5	5	5			0.00218604	0.0462252	0.0154317	0.0144035
	58	5	5	5			0.00251815	0.0700961	0.0175591	0.0140769
	47	5	8	5			0.00264939	0.0472912	0.0321622	0.0362803
	52	4	6	4			0.00255848	0.0591074	0.0202873	0.0185312
	45	5	5	5			0.00224623	0.0464624	0.0235107	0.0276288
	56	5	5	5			0.00262819	0.0653166	0.0191323	0.0194976
	54	5	6	5			0.00248839	0.0595305	0.0208017	0.0168377
	45	5	6	5			0.00321375	0.0443181	0.0187502	0.0148935
	53	5	6	5			0.00313909	0.0608441	0.0248015	0.0166926
	51	5	6	5			0.00294693	0.0535908	0.0278491	0.0207181
	52	5	6	5			0.00271273	0.0562916	0.0304775	0.0208202
	61	5	7	5			0.00275087	0.0778693	0.0259856	0.0213935
	56	5	6	5			0.00265136	0.0627359	0.0199398	0.0174165
	50	5	8	5			0.00231929	0.0523784	0.0307457	0.0253
	39	6	6	5			0.00208466	0.03448	0.0205826	0.0153457
	56	5	5	5			0.00253835	0.0693796	0.0200926	0.0198857
	54	5	5	5			0.00236884	0.0607099	0.0194242	0.0154663
	47	5	5	5			0.00222486	0.0510965	0.0176801	0.0171648
	38	5	6	5			0.00129404	0.0342492	0.0186952	0.015407
	47	5	7	5			0.00140756	0.0515545	0.0292838	0.025867
	46	5	5	5			0.00135942	0.0452067	0.0204821	0.0170251
	53	5	6	5			0.00159859	0.0634519	0.0168728	0.0176964
	52	5	6	5			0.00169872	0.0596639	0.0241644	0.0169364
	42	5	5	5			0.00212583	0.0385582	0.0189221	0.0141023
	46	5	7	5			0.00233395	0.045906	0.0257839	0.0185422
	57	5	5	5			0.00274298	0.0683941	0.0181847	0.0136568
	48	5	6	5			0.00256286	0.0563028	0.0303583	0.0194185
	39	5	7	5			0.00209382	0.0430902	0.0245461	0.0186289
	46	5	6	5			0.00221432	0.0544408	0.0241789	0.0196855
	40	5	5	5			0.00212106	0.0427689	0.0183844	0.0149712
	42	5	6	5			0.00211079	0.043926	0.0262745	0.0177269
	36	5	5	5			0.0018884	0.0373804	0.0180879	0.0141364
	50	5	5	5			0.00232111	0.0669399	0.011488	0.0109169
	40	5	5	5			0.00191768	0.0414794	0.0164393	0.0145257
	33	5	6	5			0.00118177	0.0295879	0.0157759	0.0160081
	50	5	5	5			0.00150065	0.0588945	0.0175441	0.0152963
	36	5	7	5			0.00120934	0.0332961	0.0239506	0.0205847
	65	5	6	5			0.00195033	0.0859193	0.0257086	0.0197187
	64	5	5	5			0.00216371	0.0907868	0.0216897	0.0174987
	40	5	5	5			0.00218206	0.0398422	0.014559	0.0145754
	50	5	5	5			0.00212999	0.0598706	0.0207	0.0244356
	43	5	5	5			0.00166899	0.039606	0.0184159	0.0166878
	45	5	6	5			0.00141241	0.0436802	0.0205006	0.0182386
	45	5	5	5			0.00137382	0.042697	0.0169189	0.0162105
	46	5	5	5			0.00138853	0.0442918	0.0178199	0.0163356
	46	5	6	5			0.00140944	0.0462255	0.0179739	0.0168654
	49	5	6	5			0.0014725	0.0489271	0.0238839	0.0184665
	39	5	5	5			0.00129636	0.0345155	0.0154321	0.0122842
	46	5	6	5			0.00141664	0.0447494	0.0184764	0.019891
	56	5	7	5			0.00159301	0.078149	0.0183582	0.0217948
	40	5	5	5			0.00126375	0.0525123	0.0154911	0.0126205
	47	5	5	5			0.00163634	0.0579498	0.0173002	0.0141731
	45	5	6	5			0.00143187	0.0542158	0.0217611	0.0163096
	41	5	6	5			0.00129026	0.0420712	0.0184026	0.0167713
	48	5	5	5			0.00200903	0.0578993	0.0130407	0.0134743
	45	5	6	5			0.0015253	0.0537891	0.0278714	0.0202339
	56	5	6	5			0.00152878	0.0772122	0.0239626	0.0178649
	55	5	6	5			0.0021982	0.0742099	0.0251384	0.019945
	53	5	6	5			0.00236194	0.0627542	0.0169439	0.0189821
	42	5	5	5			0.00204305	0.0486443	0.0168987	0.0140543
	65	5	6	5			0.00277156	0.0981411	0.0179757	0.0167106
	56	5	6	5			0.00251399	0.0637809	0.0211265	0.0166234
	36	6	5	5			0.00192591	0.0304821	0.0189899	0.0157345
	38	5	5	5			0.00212588	0.0367447	0.0163217	0.0132641
	45	5	6	5			0.00233303	0.0423205	0.0178221	0.0164632
	53	5	6	5			0.00256815	0.0625943	0.0219385	0.016034
	45	5	6	5			0.00235875	0.0482083	0.0253333	0.0198081
	54	5	7	5			0.0026745	0.0611887	0.0264993	0.0241032
	46	5	5	5			0.00239829	0.0451905	0.018648	0.013387
	42	5	6	5			0.0018557	0.0385369	0.0188356	0.0160323
	57	5	5	5			0.00166575	0.0646177	0.0202308	0.0166147
	37	5	7	5			0.00201784	0.033061	0.0186336	0.0174226
	36	5	5	5			0.00203914	0.0315724	0.0126038	0.0133811
	37	5	6	5			0.00208772	0.0329346	0.0148689	0.0141714
	48	5	6	5			0.00237857	0.0469895	0.0219169	0.021363
	56	5	5	5			0.00269364	0.0623967	0.0203787	0.0143171
	64	5	7	5			0.00280052	0.0818304	0.027113	0.0203486
	40	5	5	5			0.00206405	0.0408678	0.0194329	0.0141839
	30	5	6	5			0.00120323	0.0230298	0.0139491	0.0190892
	56	5	5	5			0.00163396	0.0664372	0.0189659	0.0148572
	46	5	5	5			0.0021182	0.0497633	0.0174091	0.0132612
	44	5	6	5			0.00238304	0.0405409	0.0182358	0.0161774
	38	5	5	5			0.00219545	0.032977	0.0176801	0.0140289
	46	5	6	5			0.00232992	0.0462677	0.0150722	0.0155828
	44	5	6	5			0.00220052	0.0417156	0.0141617	0.0174605
	38	5	6	5			0.00193511	0.0342354	0.00943032	0.0128778
	63	5	7	5			0.00278405	0.0806818	0.0156936	0.0194325
	48	5	6	5			0.00233778	0.0510207	0.0149656	0.0182357
	62	5	6	5			0.0027896	0.0721005	0.013774	0.0169408
	52	5	6	5			0.00185684	0.0540392	0.0125663	0.0171916
	46	5	6	5			0.001511	0.0439863	0.0131561	0.0164393
	53	5	5	5			0.00150442	0.0628661	0.016433	0.0204391
	33	4	5	4			0.00129667	0.0267523	0.0118201	0.016423
	61	5	5	5			0.00294562	0.071576	0.0131931	0.0157443
	53	5	5	5			0.00263776	0.0556867	0.0131434	0.0160589
	45	5	7	5			0.00238259	0.0482653	0.0149369	0.0189897
	54	5	5	5			0.00267011	0.0704942	0.0123597	0.0139939
	46	5	6	5			0.00250528	0.0482778	0.0149427	0.0177281
	44	5	5	5			0.00228388	0.0451485	0.011985	0.0134948
	54	5	7	5			0.00262413	0.0575584	0.015443	0.0202568
	51	5	6	5			0.00218168	0.0526553	0.0153319	0.0188417
	46	5	6	5			0.00143247	0.0460374	0.0133126	0.016132
	47	5	6	5			0.00136051	0.0456629	0.0134222	0.0165128
	65	5	5	5			0.00168056	0.0816834	0.0136278	0.0162157
	60	5	6	5			0.00157576	0.0833646	0.0153328	0.0163448
	57	5	6	5			0.00181067	0.0721245	0.014339	0.0174767
	55	5	6	5			0.00248605	0.0606002	0.0185874	0.02058
	58	5	5	5			0.00173417	0.0696139	0.0128306	0.0173571
	38	5	5	5			0.00120772	0.0380112	0.0092538	0.0131884
	52	5	7	5			0.00141138	0.0540826	0.0198213	0.0223619
	49	5	5	5			0.00135847	0.0550873	0.0111741	0.0131874
	44	5	8	5			0.00126402	0.0421643	0.0184239	0.0195735
	41	5	5	5			0.00122271	0.0362724	0.0141927	0.0141603
	38	5	5	5			0.00146015	0.0344916	0.0116139	0.0153112
	45	5	6	5			0.00212666	0.0423634	0.0151203	0.0211022
	52	5	6	5			0.00294445	0.0575633	0.0151561	0.0187723
	47	5	6	5			0.00259021	0.0455579	0.013052	0.0170092
	52	5	6	5			0.00194989	0.055537	0.0179509	0.0205165
	43	5	7	5			0.00177896	0.0451583	0.0157113	0.0200451
	42	5	5	5			0.00141672	0.0398683	0.00969669	0.0113785
	63	5	6	5			0.00173873	0.0797487	0.0134358	0.0168419
	49	5	6	5			0.00137291	0.0519802	0.0204007	0.0178526
	46	5	5	5			0.00148068	0.0485363	0.0124544	0.014554
	56	5	6	5			0.00140994	0.0639314	0.0188527	0.0205565
	43	5	5	5			0.0011352	0.0438394	0.0102353	0.0133609
	50	5	5	5			0.00123825	0.0532912	0.0112206	0.0135111
	48	5	7	5			0.00119627	0.0504294	0.0167295	0.020303
	53	5	5	5			0.00227203	0.0542846	0.0132886	0.0179306
	43	5	7	5			0.00212703	0.040401	0.0176476	0.0214233
	49	5	7	5			0.0020235	0.0496225	0.0169824	0.0187398
	46	5	6	5			0.00197878	0.0456748	0.011428	0.0140636
	60	5	6	5			0.00231257	0.0695482	0.0160077	0.0188791
	38	5	6	5			0.0016162	0.0324608	0.0130461	0.0162757
	48	5	6	5			0.00154783	0.0474368	0.0141847	0.0166312
	51	5	5	5			0.0013935	0.0544919	0.011075	0.0140933
	65	5	5	5			0.00144432	0.0849037	0.0148576	0.0174071
	37	5	5	5			0.00102557	0.0318059	0.00988595	0.0120724
	56	5	5	5			0.00132366	0.0599217	0.0128882	0.0190591
	56	5	6	5			0.00147935	0.0602065	0.0143518	0.0170089
	51	5	5	5			0.00133978	0.053615	0.0138837	0.0171
	44	5	5	5			0.00113705	0.0425402	0.0119767	0.0137393
	57	5	6	5			0.0018696	0.0805352	0.015308	0.0176729
	42	5	6	5			0.0023093	0.0439663	0.0162331	0.0189883
	52	5	5	5			0.00239976	0.0796617	0.0146121	0.0162236
	32	5	6	5			0.00166754	0.0315432	0.0176373	0.0184748
	40	5	5	5			0.00145244	0.0405238	0.0170292	0.01634
	39	5	6	5			0.00139095	0.0376787	0.0145179	0.0149718
	63	5	6	5			0.00144784	0.0868392	0.020504	0.0219479
	45	5	6	5			0.00119342	0.0530828	0.0216853	0.0185994
	45	5	5	5			0.00117361	0.0524852	0.013067	0.0155882
	38	5	5	5			0.00116697	0.038025	0.01364	0.0146877
	66	5	5	5			0.00173106	0.098922	0.0159942	0.0183492
	48	5	5	5			0.00125366	0.0619635	0.0150568	0.0201851
	45	5	6	5			0.00116759	0.0433596	0.0139586	0.023224
	60	5	5	5			0.0024133	0.0718082	0.012351	0.0156649
	49	5	6	5			0.00228711	0.0510991	0.0127691	0.0170732
	54	5	6	5			0.00252238	0.0584746	0.0145562	0.0200274
	41	6	6	5			0.00206907	0.0401447	0.0121197	0.015882
	54	4	5	4			0.00213433	0.0577796	0.0143217	0.0155053
	45	5	5	5			0.00159049	0.046241	0.0123924	0.0146735
	60	5	7	5			0.00184343	0.0844509	0.0171054	0.0217449
	66	5	5	5			0.00149742	0.0888896	0.0149319	0.0176187
	43	5	6	5			0.00113407	0.0396661	0.0133112	0.0161414
	52	5	7	5			0.00127732	0.0535182	0.0201767	0.0223637
	37	5	6	5			0.00116915	0.0314589	0.0132487	0.0157433
	52	5	6	5			0.00137608	0.0556808	0.0164389	0.0236078
	46	5	6	5			0.00122015	0.0457696	0.0181679	0.0258048
	25	6	5	5			0.00085446	0.0183427	0.0116696	0.0157918
	38	5	7	5			0.00106881	0.0376005	0.020264	0.027146
	32	5	6	5			0.000978919	0.0253001	0.0167898	0.0191218
	46	5	5	5			0.00117812	0.0441439	0.00959631	0.0130598
	49	5	6	5			0.00126587	0.0530582	0.0146904	0.018912
	41	5	6	5			0.00132759	0.0420301	0.0125328	0.0178591
	66	5	6	5			0.00149342	0.0889166	0.0161049	0.0222614
	52	5	6	5			0.00132886	0.0656492	0.0134949	0.017086
	48	5	6	5			0.0013444	0.0473141	0.0142936	0.0184205
	53	5	5	5			0.00149614	0.0574627	0.01069	0.0122071
	61	5	5	5			0.00162418	0.0737686	0.0149998	0.0156367
	53	5	7	5			0.00153353	0.0572462	0.0180399	0.0216478
	44	5	5	5			0.00118568	0.0415048	0.013125	0.0150127
	59	5	6	5			0.00137856	0.0681091	0.0183508	0.0200446
	52	5	5	4			0.00128454	0.0599886	0.0108478	0.0124176
	38	5	5	5			0.00101519	0.0332645	0.0129432	0.014451
	33	5	6	5			0.000950441	0.0282652	0.0141675	0.0175038
	46	5	6	5			0.00117155	0.044029	0.0156022	0.0186697
	44	5	7	5			0.00115763	0.0443453	0.0182923	0.0278876
	49	5	5	5			0.00126261	0.0503548	0.0124691	0.0189209
	40	5	6	5			0.00107785	0.0362088	0.0175409	0.0171257
	53	5	5	5			0.00124825	0.0558291	0.0131475	0.0171176
	46	5	6	5			0.00121559	0.0438747	0.0159753	0.0180317
	44	5	5	5			0.00209454	0.0407617	0.0106694	0.0127599
	47	5	6	5			0.00247256	0.0500873	0.0139074	0.0171868
	39	5	5	5			0.0021606	0.035012	0.0136982	0.0171296
	53	5	7	5			0.00237138	0.0616979	0.0185128	0.0219543
	33	5	6	5			0.00161195	0.0300802	0.0138491	0.0177256
	40	5	4	4			0.00168126	0.0432688	0.00937445	0.00978388
	47	5	7	5			0.00164797	0.0468962	0.0180202	0.0224721
	32	5	6	5			0.00111621	0.0252917	0.0167753	0.0184735
	59	5	6	5			0.00154282	0.0715015	0.0124487	0.0161871
	53	5	6	5			0.00132182	0.0558168	0.013499	0.0164029
	46	5	9	5			0.00119318	0.0452947	0.0259179	0.0295543
	49	5	7	5			0.0012471	0.0487602	0.0174073	0.0201886
	70	5	5	5			0.00150459	0.0942663	0.0122648	0.0160546
	55	5	6	5			0.00135981	0.0591198	0.015605	0.0205418
	54	5	7	5			0.00257068	0.0593997	0.0164301	0.02006
	56	5	5	5			0.00140828	0.0610841	0.0121124	0.0149244
	41	5	6	5			0.00111196	0.0384957	0.0160836	0.0176349
	55	5	5	5			0.00130369	0.0576339	0.0127609	0.0168564
	29	5	7	5			0.00090191	0.021877	0.0149542	0.0186329
	38	5	5	5			0.00102279	0.0335007	0.0112255	0.0139199
	36	5	6	5			0.000992546	0.0316472	0.0164054	0.0197302
	46	5	5	5			0.00119687	0.0438148	0.0116923	0.0142963
	49	5	6	5			0.00249264	0.0517641	0.0131422	0.0160096
	46	5	5	5			0.00130445	0.0437139	0.0108294	0.013069
	51	5	6	5			0.00132239	0.0587678	0.0171955	0.0180181
	68	5	5	5			0.00168604	0.087791	0.0150513	0.0196051
	44	5	7	5			0.00140998	0.0408748	0.0166766	0.0208012
	55	5	6	5			0.00154423	0.0636526	0.0156108	0.0192194
	40	5	5	5			0.0016852	0.0373819	0.00958674	0.0124259
	48	5	6	5			0.00138798	0.0492978	0.0173923	0.0212261
	51	5	6	5			0.001672	0.0538959	0.0109527	0.0184506
	46	5	6	5			0.00199458	0.0465861	0.0212178	0.0219032
	30	5	5	5			0.00151693	0.0246553	0.0108709	0.0139011
	56	5	6	5			0.00176617	0.0632152	0.0154242	0.0169703
	48	5	6	5			0.00121459	0.0518004	0.0134934	0.0165352
	57	5	6	5			0.00137667	0.0623117	0.0147406	0.0189826
	45	5	5	5			0.00124928	0.0461908	0.0132129	0.0157961
	42	5	5	5			0.00123564	0.038898	0.0141314	0.0120746
	57	5	7	5			0.00136389	0.0645545	0.0191417	0.021552
	41	5	5	5			0.00112352	0.0369542	0.0145325	0.014339
	26	5	6	5			0.000863473	0.0188768	0.0145032	0.0163505
	58	5	5	5			0.00135358	0.0657675	0.0143425	0.0160967
	39	5	5	5			0.0011489	0.0399921	0.0114047	0.0137851
	50	5	8	5			0.00123673	0.0603092	0.0187851	0.0226101
	48	5	7	5			0.00118744	0.0482219	0.0178988	0.0207711
	51	5	6	5			0.00137624	0.0526401	0.0140001	0.0164827
	50	5	5	5			0.00147706	0.0526177	0.0120396	0.0124792
	46	5	5	5			0.00144793	0.0455575	0.0150674	0.0168691
	50	5	6	5			0.00136224	0.0506033	0.0134341	0.0147829
	51	5	7	5			0.00126808	0.0615551	0.0157281	0.0191927
	43	5	7	5			0.00112535	0.0488598	0.01854	0.0218539
	77	5	5	5			0.00160858	0.11876	0.0144485	0.0151939
	48	5	7	5			0.00119092	0.0540014	0.0156397	0.0187864
	56	5	5	5			0.00128153	0.0686588	0.0132458	0.0254105
	52	5	5	5			0.00121211	0.0586948	0.0112327	0.0151824
	39	5	6	5			0.00106193	0.0359144	0.014583	0.0176761
	64	5	5	5			0.00145809	0.0799638	0.0149727	0.0165197
	37	5	6	5			0.00105462	0.0354864	0.013188	0.0154054
	33	5	5	5			0.00100964	0.0262893	0.0143278	0.01331
	40	5	7	5			0.00110575	0.0368197	0.0167055	0.0225421
	45	5	6	5			0.00118397	0.04669	0.0121079	0.0150088
	42	5	6	5			0.00113353	0.0413632	0.016786	0.0162894
	55	5	6	5			0.00131084	0.0742521	0.0261225	0.019644
	46	5	6	5			0.00120024	0.0453251	0.0207708	0.0187106
	54	5	7	5			0.00129396	0.0573022	0.0183701	0.0231657
	67	6	7	5			0.00145616	0.0902945	0.0228601	0.0302666
	40	5	6	5			0.00127256	0.0419881	0.0158124	0.0170089
	49	5	6	5			0.00251261	0.0521504	0.0136334	0.0153831
	48	5	6	5			0.0023755	0.0474704	0.0113052	0.0134003
	59	5	6	5			0.00218891	0.0728246	0.0173729	0.0189763
	36	5	5	5			0.00117389	0.0327771	0.0147385	0.0167046
	42	5	6	5			0.00110413	0.0392984	0.0187863	0.0245353
	36	5	6	5			0.00101546	0.0303374	0.0133288	0.0191078
	49	5	6	5			0.00120059	0.0493466	0.0186225	0.0232102
	40	5	6	5			0.00106415	0.0357977	0.0118364	0.0152909
	45	5	7	5			0.00118275	0.0484481	0.0218818	0.0197111
	65	5	6	5			0.00164648	0.0896305	0.015368	0.0183012
	62	5	6	5			0.00143108	0.0926404	0.0184873	0.0203287
	44	5	5	5			0.00111091	0.0429349	0.0118218	0.0132068
	42	5	5	5			0.00109673	0.0415196	0.0127851	0.0141274
	53	5	5	5			0.00124281	0.0606159	0.0142587	0.0194439
	40	5	5	5			0.00107663	0.0378717	0.0110199	0.0131307
	32	5	5	5			0.000944518	0.0259142	0.0119413	0.014337
	42	5	6	5			0.00153622	0.0424937	0.013718	0.0165055
	50	5	6	5			0.00258479	0.051523	0.0158507	0.0181755
	50	5	6	5			0.00252887	0.0520774	0.0143211	0.0164219
	47	5	5	5			0.00313808	0.0474118	0.0136111	0.0181003
	45	5	6	5			0.00200115	0.0421541	0.0130917	0.0175084
	38	5	6	5			0.00179849	0.0342004	0.0138142	0.0166023
	57	5	7	5			0.00341033	0.0638012	0.0151781	0.0185759
	35	5	5	5			0.00155754	0.0323079	0.0140036	0.0134805
	47	5	5	5			0.00135319	0.0470071	0.0127329	0.0144953
	56	5	5	5			0.00136382	0.0618893	0.0121623	0.0143851
	39	5	5	5			0.00106922	0.0435343	0.0123718	0.0149667
	59	5	5	5			0.00136593	0.0659882	0.011225	0.0136889
	42	5	8	5			0.00147622	0.040432	0.021529	0.0238666
	40	5	6	5			0.00135771	0.04061	0.0152897	0.0232693
	32	5	5	5			0.00198265	0.0291425	0.0095215	0.0127418
	37	5	5	5			0.00207006	0.0321591	0.00801593	0.0120937
	47	5	5	5			0.00230079	0.0459279	0.0111658	0.0140042
	47	5	6	5			0.00195859	0.0457514	0.0138301	0.0188891
	40	5	5	5			0.00157359	0.0404942	0.0127449	0.0166911
	48	5	5	5			0.00180283	0.0531551	0.0166169	0.016238
	40	5	5	5			0.00130609	0.0354062	0.0136796	0.0141845
	36	5	6	5			0.00120471	0.0331159	0.0158177	0.0188222
	50	5	5	5			0.00140925	0.0518107	0.0118962	0.0147809
	63	5	6	5			0.00236601	0.0801587	0.0150994	0.0186493
	39	5	6	5			0.00154955	0.037444	0.0148464	0.016379
	39	5	6	5			0.00140089	0.0360484	0.0147678	0.0179921
	44	5	5	5			0.00220077	0.0493378	0.0129213	0.0161359
	57	5	5	5			0.00278445	0.0682862	0.0125149	0.0148768
	36	5	6	5			0.0020489	0.0323838	0.0136486	0.0166157
	38	5	6	5			0.00194151	0.0364378	0.0130438	0.0164288
	38	5	6	5			0.00170379	0.0335283	0.014729	0.0182003
	53	5	6	5			0.00186442	0.0552305	0.0192767	0.0194033
	47	5	5	5			0.00154967	0.0456694	0.0133732	0.0153608
	61	5	6	5			0.00159356	0.0754309	0.0146928	0.0202857
	36	5	6	5			0.00109614	0.0345646	0.0107108	0.0147162
	44	5	6	5			0.00115079	0.042907	0.0138442	0.0152937
	28	5	5	5			0.000920987	0.0215037	0.0122339	0.015424
	50	5	6	5			0.00120837	0.0497166	0.0129686	0.0153951
	44	5	8	5			0.0011252	0.0439696	0.024976	0.0238957
	45	5	6	5			0.00114215	0.0432286	0.0160002	0.0194743
	55	5	5	5			0.00128437	0.0624695	0.0114051	0.0142973
	53	5	5	5			0.0025731	0.0622407	0.0124932	0.014741
	48	5	6	5			0.0024518	0.0484149	0.0155697	0.0187025
	53	5	5	5			0.00256188	0.0593174	0.0164029	0.0173068
	48	5	5	5			0.00209849	0.0486109	0.0129441	0.0152929
	38	5	5	5			0.00194468	0.0323625	0.0152864	0.0165225
	36	5	5	5			0.00140583	0.0314253	0.0145823	0.0158064
	46	5	7	5			0.00143849	0.0493153	0.0187451	0.0209564
	55	5	5	5			0.00128217	0.0590726	0.0154888	0.0177109
	32	5	5	5			0.00118698	0.0256033	0.0121521	0.0157322
	40	5	6	5			0.00128731	0.0372611	0.0146644	0.0176948
	42	5	5	5			0.00132312	0.0414485	0.0121094	0.0155492
	38	5	5	5			0.00129743	0.0352373	0.0121444	0.0146042
	45	5	5	5			0.00140985	0.0423785	0.0151341	0.0177232
	60	5	5	5			0.0015337	0.0698556	0.0123131	0.0169541
	40	5	6	5			0.00231854	0.0361926	0.0135535	0.0212259
	56	5	6	5			0.00240433	0.0629793	0.0124526	0.0196776
	46	5	6	5			0.0019374	0.0444206	0.0140587	0.0162702
	41	5	6	5			0.00144478	0.0370599	0.0152678	0.018375
	43	5	5	5			0.00139489	0.0434255	0.0138415	0.0159412
	41	5	5	5			0.00126732	0.037484	0.015819	0.016287
	41	5	6	5			0.00111767	0.0370278	0.011884	0.0166397
	51	5	5	5			0.00122983	0.0548449	0.0125424	0.0173737
	37	5	5	5			0.00103061	0.0320871	0.0102511	0.0148666
	31	5	6	5			0.000937831	0.0247383	0.0123748	0.0155199
	49	5	5	5			0.00119118	0.0533768	0.0117863	0.0141636
	50	5	6	5			0.0012038	0.0520812	0.0141167	0.0171621
	47	5	6	5			0.00122658	0.0485759	0.0122873	0.0153683
	38	5	5	5			0.00117743	0.0380593	0.0140086	0.0155586
	44	5	6	5			0.00119623	0.0420757	0.0170406	0.0198958
	46	5	6	5			0.00115848	0.048799	0.0141854	0.0178704
	66	5	5	5			0.00176051	0.0840198	0.0136636	0.0176497
	49	5	5	5			0.00251279	0.0582895	0.0114681	0.0145006
	40	5	6	5			0.00218104	0.0385924	0.0138322	0.0173251
	59	5	5	5			0.00275238	0.0744578	0.0113157	0.0138119
	45	4	5	4			0.00214155	0.0451425	0.0125951	0.01518
	45	5	6	5			0.00183471	0.0428388	0.0174184	0.0199088
	47	5	6	5			0.00162231	0.0470305	0.0177234	0.0191151
	53	5	6	5			0.00137722	0.0563167	0.0170529	0.0220757
	47	5	7	5			0.00118166	0.049685	0.0177494	0.0188198
	49	5	6	5			0.00128217	0.0551494	0.0166704	0.0197296
	41	5	5	5			0.00109935	0.0416361	0.0121415	0.0149391
	35	5	6	5			0.00100787	0.0304763	0.0137006	0.0152978
	55	5	5	5			0.00147265	0.0628244	0.020782	0.013793
	51	5	5	5			0.00149525	0.0549566	0.0179602	0.0150784
	45	5	6	5			0.00125631	0.0439388	0.0147166	0.0170751
	41	5	6	5			0.00110196	0.0376954	0.0147758	0.019376
	53	5	5	5			0.00126122	0.0653347	0.0177595	0.0189235
	51	5	6	5			0.00123208	0.0528828	0.0149454	0.0169905
	64	5	5	5			0.00143099	0.0785343	0.0127556	0.0158706
	44	5	5	5			0.00118567	0.0410694	0.0123076	0.0147009

## Sheet: Figure 2c
	koff = 0.01 (frame-1)				koff = 0.1 (frame-1)					koff = 1 (frame-1)
Frame	Simulated Intensity (au)	True Sequence		Frame	Simulated Intensity (au)	True Sequence			Frame	Simulated Intensity (au)	True Sequence
1	1.12811	1.00941		1	1.04216	0.988087			1	0.983734	1.00333
2	1.18225	1.00941		2	0.973483	0.988087			2	1.04264	1.00333
3	0.946553	1.00941		3	1.06753	0.988087			3	1.08352	1.00333
4	1.28776	1.00941		4	1.28457	0.988087			4	1.07839	1.00333
5	0.844203	1.00941		5	0.993508	0.988087			5	0.808416	1.00333
6	0.528953	1.00941		6	1.40425	0.988087			6	1.02363	1.00333
7	0.883023	1.00941		7	1.11673	0.988087			7	1.26747	1.00333
8	1.53525	1.00941		8	1.19184	0.988087			8	1.0193	1.00333
9	0.896055	1.00941		9	0.837851	0.988087			9	1.13126	1.00333
10	1.08951	1.00941		10	1.26555	0.988087			10	1.06282	1.00333
11	0.996799	1.00941		11	0.900083	0.988087			11	1.04305	1.00333
12	1.13633	1.00941		12	1.01292	0.988087			12	1.02555	1.00333
13	0.82172	1.00941		13	0.881019	0.988087			13	1.04955	1.00333
14	1.14264	1.00941		14	0.937392	0.988087			14	1.20918	1.00333
15	0.495478	1.00941		15	1.24437	0.988087			15	0.747646	1.00333
16	1.30848	1.00941		16	0.935271	0.988087			16	1.09037	1.00333
17	0.749202	1.00941		17	0.955055	0.988087			17	1.31576	1.00333
18	2.28073	2.00934		18	1.1484	0.988087			18	1.3442	1.00333
19	2.19035	2.00934		19	1.11788	0.988087			19	0.923231	1.00333
20	2.29157	2.00934		20	1.29112	0.988087			20	0.685836	1.00333
21	1.91472	2.00934		21	1.00408	0.988087			21	0.860371	1.00333
22	2.02026	2.00934		22	1.39291	0.988087			22	1.37852	1.00333
23	2.0608	2.00934		23	0.863592	0.988087			23	0.652001	1.00333
24	2.07282	2.00934		24	1.02536	0.988087			24	1.05483	1.00333
25	2.09234	2.00934		25	2.24509	2.01593			25	0.713987	1.00333
26	2.02223	2.00934		26	2.35004	2.01593			26	0.961933	1.00333
27	2.05597	2.00934		27	1.79296	2.01593			27	1.17731	1.00333
28	2.14448	2.00934		28	1.89	2.01593			28	1.37264	1.00333
29	1.93895	2.00934		29	2.08572	2.01593			29	1.00076	1.00333
30	1.93491	2.00934		30	2.09054	2.01593			30	1.07594	1.00333
31	1.10783	1.00941		31	1.9179	2.01593			31	0.85609	1.00333
32	1.02303	1.00941		32	2.36964	2.01593			32	1.13441	1.00333
33	0.822316	1.00941		33	1.84564	2.01593			33	0.881604	1.00333
34	1.12532	1.00941		34	2.10842	2.01593			34	1.36132	1.00333
35	1.24371	1.00941		35	2.0469	2.01593			35	1.08817	1.00333
36	0.558073	1.00941		36	0.827481	0.988087			36	1.07498	1.00333
37	0.580571	1.00941		37	1.06737	0.988087			37	0.87674	1.00333
38	0.543789	1.00941		38	1.18974	0.988087			38	1.12892	1.00333
39	0.806481	1.00941		39	1.32576	0.988087			39	0.715463	1.00333
40	1.18879	1.00941		40	0.947826	0.988087			40	0.881184	1.00333
41	1.33679	1.00941		41	0.781646	0.988087			41	0.847458	1.00333
42	1.09356	1.00941		42	1.35303	0.988087			42	0.905984	1.00333
43	0.817086	1.00941		43	1.12621	0.988087			43	1.03533	1.00333
44	0.821097	1.00941		44	0.951079	0.988087			44	1.51135	1.00333
45	0.747743	1.00941		45	1.55585	0.988087			45	1.97035	2.04109
46	1.26795	1.00941		46	0.758947	0.988087			46	0.603393	1.00333
47	1.071	1.00941		47	0.699836	0.988087			47	0.792773	1.00333
48	0.704255	1.00941		48	2.26761	2.01593			48	0.840629	1.00333
49	1.10351	1.00941		49	1.92922	2.01593			49	0.960538	1.00333
50	0.855916	1.00941		50	0.97058	0.988087			50	1.18861	1.00333
51	1.0382	1.00941		51	0.973116	0.988087			51	1.09792	1.00333
52	1.1806	1.00941		52	0.852627	0.988087			52	1.28332	1.00333
53	0.691595	1.00941		53	1.1558	0.988087			53	0.688521	1.00333
54	0.891565	1.00941		54	0.704992	0.988087			54	1.19848	1.00333
55	1.8971	2.00934		55	0.669027	0.988087			55	1.00882	1.00333
56	2.17135	2.00934		56	1.15449	0.988087			56	1.29416	1.00333
57	1.97872	2.00934		57	1.45696	0.988087			57	0.891068	1.00333
58	1.74453	2.00934		58	0.970706	0.988087			58	1.99362	2.04109
59	2.08031	2.00934		59	0.733293	0.988087			59	1.41362	1.00333
60	2.35411	2.00934		60	1.09224	0.988087			60	0.702441	1.00333
61	1.91182	2.00934		61	0.896376	0.988087			61	1.12039	1.00333
62	2.16448	2.00934		62	0.735044	0.988087			62	1.07799	1.00333
63	2.21862	2.00934		63	0.817945	0.988087			63	1.05386	1.00333
64	2.00414	2.00934		64	0.690047	0.988087			64	0.494369	1.00333
65	2.05568	2.00934		65	1.11655	0.988087			65	0.912324	1.00333
66	1.9505	2.00934		66	0.937235	0.988087			66	0.992831	1.00333
67	1.85642	2.00934		67	0.878334	0.988087			67	1.16162	1.00333
68	2.07108	2.00934		68	0.919331	0.988087			68	1.00838	1.00333
69	2.15626	2.00934		69	1.02143	0.988087			69	0.95721	1.00333
70	2.03408	2.00934		70	1.19072	0.988087			70	1.07116	1.00333
71	1.51115	2.00934		71	0.895793	0.988087			71	1.06047	1.00333
72	1.89145	2.00934		72	1.37806	0.988087			72	1.14693	1.00333
73	1.97447	2.00934		73	0.975376	0.988087			73	0.996938	1.00333
74	1.99221	2.00934		74	0.728382	0.988087			74	1.05761	1.00333
75	1.91411	2.00934		75	1.13645	0.988087			75	1.38048	1.00333
76	2.06168	2.00934		76	0.873393	0.988087			76	0.802893	1.00333
77	1.94016	2.00934		77	0.981833	0.988087			77	1.16358	1.00333
78	2.00586	2.00934		78	1.13895	0.988087			78	0.629786	1.00333
79	2.15015	2.00934		79	1.49468	0.988087			79	0.799183	1.00333
80	1.96606	2.00934		80	1.17133	0.988087			80	0.998216	1.00333
81	2.27338	2.00934		81	0.87339	0.988087			81	1.17177	1.00333
82	1.96587	2.00934		82	0.943247	0.988087			82	1.1345	1.00333
83	2.10546	2.00934		83	0.674022	0.988087			83	1.16124	1.00333
84	1.82974	2.00934		84	1.09125	0.988087			84	0.909697	1.00333
85	1.95677	2.00934		85	0.621769	0.988087			85	1.32439	1.00333
86	1.87169	2.00934		86	0.959156	0.988087			86	0.80873	1.00333
87	2.1856	2.00934		87	0.946113	0.988087			87	1.35626	1.00333
88	1.99807	2.00934		88	0.898066	0.988087			88	0.810385	1.00333
89	1.82247	2.00934		89	1.2661	0.988087			89	1.27236	1.00333
90	2.1099	2.00934		90	1.0433	0.988087			90	1.18302	1.00333
91	2.21182	2.00934		91	1.16185	0.988087			91	0.721199	1.00333
92	1.9916	2.00934		92	1.05843	0.988087			92	0.853056	1.00333
93	1.94294	2.00934		93	0.897393	0.988087			93	0.829495	1.00333
94	1.74834	2.00934		94	1.23336	0.988087			94	0.950477	1.00333
95	2.02335	2.00934		95	1.07625	0.988087			95	1.23594	1.00333
96	2.18574	2.00934		96	1.23297	0.988087			96	0.903958	1.00333
97	2.01146	2.00934		97	0.677568	0.988087			97	1.3594	1.00333
98	2.13633	2.00934		98	1.22416	0.988087			98	0.98814	1.00333
99	1.9886	2.00934		99	0.716354	0.988087			99	0.917979	1.00333
100	1.86237	2.00934		100	0.99296	0.988087			100	1.22562	1.00333
101	1.67563	2.00934		101	1.09661	0.988087			101	0.618149	1.00333
102	2.03013	2.00934		102	0.906304	0.988087			102	1.09412	1.00333
103	1.62702	2.00934		103	1.0365	0.988087			103	0.823684	1.00333
104	2.01338	2.00934		104	0.789733	0.988087			104	0.689447	1.00333
105	2.04037	2.00934		105	1.12641	0.988087			105	0.741904	1.00333
106	2.24769	2.00934		106	1.05864	0.988087			106	0.722754	1.00333
107	1.81722	2.00934		107	0.605264	0.988087			107	0.765405	1.00333
108	1.87662	2.00934		108	1.25889	0.988087			108	1.29198	1.00333
109	2.14005	2.00934		109	1.11527	0.988087			109	0.868616	1.00333
110	2.02965	2.00934		110	1.26882	0.988087			110	1.36145	1.00333
111	2.56958	2.00934		111	0.836035	0.988087			111	0.742584	1.00333
112	1.93029	2.00934		112	0.681649	0.988087			112	0.985133	1.00333
113	1.76938	2.00934		113	0.721647	0.988087			113	1.15386	1.00333
114	1.9852	2.00934		114	0.986553	0.988087			114	1.14353	1.00333
115	2.266	2.00934		115	0.741811	0.988087			115	1.12411	1.00333
116	2.11024	2.00934		116	0.943774	0.988087			116	1.16511	1.00333
117	1.59828	2.00934		117	0.986323	0.988087			117	0.646403	1.00333
118	2.09676	2.00934		118	0.866742	0.988087			118	0.825884	1.00333
119	1.95957	2.00934		119	1.05205	0.988087			119	0.986864	1.00333
120	1.46996	1.00941		120	0.644627	0.988087			120	1.095	1.00333
121	1.06235	1.00941		121	1.01603	0.988087			121	1.03227	1.00333
122	0.837019	1.00941		122	0.948302	0.988087			122	1.36713	1.00333
123	0.894139	1.00941		123	0.803336	0.988087			123	1.03554	1.00333
124	0.943059	1.00941		124	0.883656	0.988087			124	1.22366	1.00333
125	0.956276	1.00941		125	0.945261	0.988087			125	1.01868	1.00333
126	1.5181	1.00941		126	1.18798	0.988087			126	0.948122	1.00333
127	0.950124	1.00941		127	0.781521	0.988087			127	0.730543	1.00333
128	0.913222	1.00941		128	0.92682	0.988087			128	1.11932	1.00333
129	1.06281	1.00941		129	1.05637	0.988087			129	0.99091	1.00333
130	0.722764	1.00941		130	1.08013	0.988087			130	1.16524	1.00333
131	1.25863	1.00941		131	0.76572	0.988087			131	0.868245	1.00333
132	1.18104	1.00941		132	0.962485	0.988087			132	1.08182	1.00333
133	1.22865	1.00941		133	1.15391	0.988087			133	0.874546	1.00333
134	0.983612	1.00941		134	1.25275	0.988087			134	1.08668	1.00333
135	1.39374	1.00941		135	0.705316	0.988087			135	1.10551	1.00333
136	1.0357	1.00941		136	1.13188	0.988087			136	1.29624	1.00333
137	1.03542	1.00941		137	0.923967	0.988087			137	1.0085	1.00333
138	1.05339	1.00941		138	0.90811	0.988087			138	0.999311	1.00333
139	1.24949	1.00941		139	1.08885	0.988087			139	1.16527	1.00333
140	0.886668	1.00941		140	0.98104	0.988087			140	1.2283	1.00333
141	1.39618	1.00941		141	0.852901	0.988087			141	0.710112	1.00333
142	0.816636	1.00941		142	1.89035	2.01593			142	1.14691	1.00333
143	1.03805	1.00941		143	2.29519	2.01593			143	0.82671	1.00333
144	0.839058	1.00941		144	2.16643	2.01593			144	0.965708	1.00333
145	1.04273	1.00941		145	0.857307	0.988087			145	0.892457	1.00333
146	1.16483	1.00941		146	0.864974	0.988087			146	0.773139	1.00333
147	1.86903	2.00934		147	0.79778	0.988087			147	0.941811	1.00333
148	2.22975	2.00934		148	0.926976	0.988087			148	0.849406	1.00333
149	2.23801	2.00934		149	0.847926	0.988087			149	1.00464	1.00333
150	2.19034	2.00934		150	1.00696	0.988087			150	1.30007	1.00333
151	2.11134	2.00934		151	0.976179	0.988087			151	0.718741	1.00333
152	2.06861	2.00934		152	0.878481	0.988087			152	1.00385	1.00333
153	2.10764	2.00934		153	1.18668	0.988087			153	1.18905	1.00333
154	2.09973	2.00934		154	0.928417	0.988087			154	1.36791	1.00333
155	1.92781	2.00934		155	0.706047	0.988087			155	0.95722	1.00333
156	2.16518	2.00934		156	1.19002	0.988087			156	0.76464	1.00333
157	2.14201	2.00934		157	1.17614	0.988087			157	0.941116	1.00333
158	1.78049	2.00934		158	1.12047	0.988087			158	1.10201	1.00333
159	1.84922	2.00934		159	0.649829	0.988087			159	1.04372	1.00333
160	1.82895	2.00934		160	1.08393	0.988087			160	0.860746	1.00333
161	1.96953	2.00934		161	1.07475	0.988087			161	1.19049	1.00333
162	2.09449	2.00934		162	1.0491	0.988087			162	0.637312	1.00333
163	1.91657	2.00934		163	0.781212	0.988087			163	0.898018	1.00333
164	1.76335	2.00934		164	1.30492	0.988087			164	1.19011	1.00333
165	1.7216	2.00934		165	1.00165	0.988087			165	1.19423	1.00333
166	2.05262	2.00934		166	1.30315	0.988087			166	1.15343	1.00333
167	1.92754	2.00934		167	0.838892	0.988087			167	1.22848	1.00333
168	2.15162	2.00934		168	0.779958	0.988087			168	1.33017	1.00333
169	2.00229	2.00934		169	0.971351	0.988087			169	1.16381	1.00333
170	1.71248	2.00934		170	0.895074	0.988087			170	1.19492	1.00333
171	2.20257	2.00934		171	0.794288	0.988087			171	0.848831	1.00333
172	2.26074	2.00934		172	1.30219	0.988087			172	0.970508	1.00333
173	1.91376	2.00934		173	0.722081	0.988087			173	1.3248	1.00333
174	2.03388	2.00934		174	0.670293	0.988087			174	0.858095	1.00333
175	1.86906	2.00934		175	0.889814	0.988087			175	1.13518	1.00333
176	1.87055	2.00934		176	0.960117	0.988087			176	0.811001	1.00333
177	2.11443	2.00934		177	0.946205	0.988087			177	0.541923	1.00333
178	2.1198	2.00934		178	1.48192	0.988087			178	0.773205	1.00333
179	2.21435	2.00934		179	0.841191	0.988087			179	0.772316	1.00333
180	1.88427	2.00934		180	1.1909	0.988087			180	1.07171	1.00333
181	1.86386	2.00934		181	1.11119	0.988087			181	1.40304	1.00333
182	2.12076	2.00934		182	1.08257	0.988087			182	0.992632	1.00333
183	1.85442	2.00934		183	0.733668	0.988087			183	1.35196	1.00333
184	2.07317	2.00934		184	1.1401	0.988087			184	0.992443	1.00333
185	1.86354	2.00934		185	1.93406	2.01593			185	0.778133	1.00333
186	1.82726	2.00934		186	1.82353	2.01593			186	0.922117	1.00333
187	1.78481	2.00934		187	2.10321	2.01593			187	0.721892	1.00333
188	2.15999	2.00934		188	2.05111	2.01593			188	1.1042	1.00333
189	2.02328	2.00934		189	2.06499	2.01593			189	0.961043	1.00333
190	1.88324	2.00934		190	1.99308	2.01593			190	1.2433	1.00333
191	1.60522	2.00934		191	1.84371	2.01593			191	0.764155	1.00333
192	1.98429	2.00934		192	2.02518	2.01593			192	1.93507	2.04109
193	2.21768	2.00934		193	1.99606	2.01593			193	1.057	1.00333
194	2.01194	2.00934		194	1.7609	2.01593			194	1.22296	1.00333
195	1.95187	2.00934		195	2.25303	2.01593			195	0.925351	1.00333
196	2.04569	2.00934		196	1.9075	2.01593			196	1.19218	1.00333
197	1.94035	2.00934		197	1.80759	2.01593			197	0.873577	1.00333
198	1.96493	2.00934		198	1.88193	2.01593			198	0.712565	1.00333
199	1.74699	2.00934		199	2.05354	2.01593			199	1.15649	1.00333

## Sheet: Figure 2d
Precision						Recall
koff	no Viterbi		Viterbi			koff	no Viterbi		Viterbi
	mu	sd	mu	sd			mu	sd	mu	sd
0.01	0.944116	0.0916519	0.99799	0.0143482		0.01	0.932682	0.107552	0.996681	0.0243413
0.0109854	0.944925	0.0776883	0.992379	0.0316849		0.0109854	0.922122	0.114831	0.98849	0.0462688
0.0120679	0.959834	0.0712774	0.989959	0.0345194		0.0120679	0.947101	0.0802256	0.988489	0.0399503
0.0132571	0.945347	0.0827823	0.989863	0.0365006		0.0132571	0.925134	0.102399	0.983721	0.0511635
0.0145635	0.95535	0.0689395	0.994074	0.0228257		0.0145635	0.94187	0.0829871	0.990292	0.0363443
0.0159986	0.957534	0.0605133	0.994233	0.0227627		0.0159986	0.935248	0.0851503	0.986284	0.0521913
0.0175751	0.943485	0.0793031	0.988326	0.0315659		0.0175751	0.919914	0.10468	0.98397	0.0469766
0.019307	0.963982	0.0569196	0.993282	0.0210161		0.019307	0.941662	0.0748708	0.985034	0.0444114
0.0212095	0.956542	0.0669519	0.991054	0.0280467		0.0212095	0.934043	0.0954161	0.983195	0.0524118
0.0232995	0.946745	0.0709845	0.993403	0.0245401		0.0232995	0.915223	0.0965249	0.989483	0.0373712
0.0255955	0.965274	0.0517178	0.989937	0.0282432		0.0255955	0.94401	0.0865522	0.983804	0.0477005
0.0281177	0.957057	0.0497447	0.993817	0.0186205		0.0281177	0.927198	0.0809781	0.986397	0.0385357
0.0308884	0.941659	0.0786725	0.991349	0.0255785		0.0308884	0.911319	0.108073	0.986658	0.0419008
0.0339322	0.935385	0.0698679	0.988675	0.0278308		0.0339322	0.896747	0.108264	0.979013	0.0498547
0.0372759	0.951432	0.0596863	0.992575	0.0197597		0.0372759	0.909185	0.0999032	0.983665	0.0413479
0.0409492	0.945598	0.0640751	0.990709	0.0210396		0.0409492	0.899796	0.10192	0.978432	0.0470221
0.0449843	0.950915	0.0584345	0.99098	0.0223474		0.0449843	0.913004	0.0972442	0.984211	0.0383826
0.0494171	0.942485	0.0577494	0.990018	0.0228462		0.0494171	0.882026	0.106869	0.979728	0.045526
0.0542868	0.930814	0.0594606	0.985289	0.0310208		0.0542868	0.870712	0.103715	0.977487	0.0468624
0.0596362	0.935073	0.0620284	0.992286	0.0205915		0.0596362	0.88369	0.0987669	0.98441	0.0376715
0.0655129	0.933944	0.0654413	0.992792	0.0187006		0.0655129	0.882183	0.0940861	0.984821	0.0350242
0.0719686	0.934104	0.0677861	0.987603	0.0244328		0.0719686	0.881452	0.106044	0.976513	0.0426186
0.0790604	0.924943	0.0659846	0.989332	0.0234628		0.0790604	0.844157	0.116469	0.977226	0.0427582
0.0868511	0.926484	0.0746792	0.98878	0.0230278		0.0868511	0.85538	0.114478	0.979984	0.0407413
0.0954095	0.91399	0.0639645	0.990132	0.0205145		0.0954095	0.827549	0.111725	0.976855	0.0478592
0.104811	0.921384	0.0606383	0.98065	0.0346819		0.104811	0.819153	0.115624	0.968729	0.049678
0.11514	0.908682	0.069913	0.980805	0.0336448		0.11514	0.815268	0.115453	0.962463	0.055463
0.126486	0.905138	0.0707224	0.982086	0.0305851		0.126486	0.80232	0.112418	0.962579	0.058524
0.13895	0.89904	0.0657897	0.983979	0.0305887		0.13895	0.78222	0.121321	0.967172	0.0565941
0.152642	0.899598	0.0699142	0.979689	0.0333367		0.152642	0.771446	0.130504	0.960312	0.0565487
0.167683	0.899139	0.0615966	0.984673	0.0249146		0.167683	0.758438	0.131672	0.961812	0.0554038
0.184207	0.892422	0.0562695	0.98224	0.0254255		0.184207	0.744545	0.133061	0.957199	0.0613444
0.202359	0.890116	0.0590658	0.97666	0.0357468		0.202359	0.740464	0.120111	0.956273	0.0623526
0.2223	0.886087	0.0674581	0.977054	0.0351492		0.2223	0.737891	0.128298	0.95751	0.0596951
0.244205	0.863736	0.0695644	0.97895	0.0297209		0.244205	0.680128	0.131011	0.955653	0.0620177
0.26827	0.863871	0.0677001	0.98044	0.0253564		0.26827	0.687102	0.127288	0.952531	0.059061
0.294705	0.851866	0.0881629	0.975418	0.0357162		0.294705	0.664567	0.137808	0.945612	0.0755888
0.323746	0.832125	0.0715728	0.97073	0.0337923		0.323746	0.60363	0.148297	0.931973	0.0747223
0.355648	0.82734	0.0858265	0.967846	0.0395496		0.355648	0.590432	0.148369	0.926608	0.0820159
0.390694	0.807524	0.100228	0.964064	0.0387027		0.390694	0.56891	0.15341	0.915836	0.0881539
0.429193	0.790693	0.114654	0.950706	0.108768		0.429193	0.534028	0.160096	0.893232	0.143798
0.471487	0.805104	0.094603	0.953659	0.0425427		0.471487	0.517226	0.14472	0.893647	0.100028
0.517947	0.783322	0.0943031	0.949306	0.0550152		0.517947	0.460004	0.157103	0.874307	0.121008
0.568987	0.754147	0.144156	0.928176	0.143917		0.568987	0.446747	0.170382	0.85296	0.174338
0.625055	0.727636	0.152099	0.914469	0.122271		0.625055	0.374984	0.183868	0.810594	0.177827
0.686649	0.685875	0.220226	0.874914	0.21505		0.686649	0.351433	0.180745	0.774294	0.224559
0.754312	0.65366	0.229033	0.851107	0.249253		0.754312	0.320049	0.181514	0.742648	0.264053
0.828643	0.657567	0.233822	0.863548	0.246271		0.828643	0.328351	0.166552	0.766967	0.254255
0.910298	0.623134	0.251031	0.844346	0.267591		0.910298	0.289565	0.176535	0.740013	0.277713
1	0.561959	0.268568	0.787929	0.295102		1	0.23663	0.17439	0.655268	0.304044

## Sheet: Figure 2-supplement 1b
kon (frame -1)	koff (frame -1)	State 1 Occupancy (off)		State 2 Occupancy (on)
		mu	sd	mu	sd
0.02	0.01	0.33435	0.105078	0.66565	0.105078
0.02	0.0109854	0.34644	0.104767	0.65356	0.104767
0.02	0.0120679	0.35959	0.126402	0.64041	0.126402
0.02	0.0132571	0.38191	0.109425	0.61809	0.109425
0.02	0.0145635	0.41654	0.122983	0.58346	0.122983
0.02	0.0159986	0.43109	0.123586	0.56891	0.123586
0.02	0.0175751	0.4652	0.113504	0.5348	0.113504
0.02	0.019307	0.48593	0.118335	0.51407	0.118335
0.02	0.0212095	0.49321	0.105079	0.50679	0.105079
0.02	0.0232995	0.51513	0.111263	0.48487	0.111263
0.02	0.0255955	0.53757	0.105211	0.46243	0.105211
0.02	0.0281177	0.58929	0.0974508	0.41071	0.0974508
0.02	0.0308884	0.60879	0.106901	0.39121	0.106901
0.02	0.0339322	0.63981	0.0978053	0.36019	0.0978053
0.02	0.0372759	0.6611	0.0858448	0.3389	0.0858448
0.02	0.0409492	0.66595	0.0898459	0.33405	0.0898459
0.02	0.0449843	0.69395	0.0891494	0.30605	0.0891494
0.02	0.0494171	0.70229	0.0716602	0.29771	0.0716602
0.02	0.0542868	0.73387	0.0694182	0.26613	0.0694182
0.02	0.0596362	0.73819	0.0685264	0.26181	0.0685264
0.02	0.0655129	0.76622	0.0621397	0.23378	0.0621397
0.02	0.0719686	0.7846	0.0551373	0.2154	0.0551373
0.02	0.0790604	0.80008	0.0570032	0.19992	0.0570032
0.02	0.0868511	0.79991	0.0564715	0.20009	0.0564715
0.02	0.0954095	0.82729	0.0426682	0.17271	0.0426682
0.02	0.104811	0.84355	0.0431634	0.15645	0.0431634
0.02	0.11514	0.84797	0.0458569	0.15203	0.0458569
0.02	0.126486	0.86056	0.0394073	0.13944	0.0394073
0.02	0.13895	0.86909	0.0418767	0.13091	0.0418767
0.02	0.152642	0.878	0.0334271	0.122	0.0334271
0.02	0.167683	0.88954	0.0274941	0.11046	0.0274941
0.02	0.184207	0.89665	0.0326795	0.10335	0.0326795
0.02	0.202359	0.90844	0.0269913	0.09156	0.0269913
0.02	0.2223	0.90683	0.0248096	0.09317	0.0248096
0.02	0.244205	0.91463	0.0250085	0.08537	0.0250085
0.02	0.26827	0.92348	0.0226473	0.07652	0.0226473
0.02	0.294705	0.92689	0.0205814	0.07311	0.0205814
0.02	0.323746	0.93377	0.01876	0.06623	0.01876
0.02	0.355648	0.93744	0.0174948	0.06256	0.0174948
0.02	0.390694	0.94191	0.0157012	0.05809	0.0157012
0.02	0.429193	0.94836	0.0116233	0.05164	0.0116233
0.02	0.471487	0.94831	0.014913	0.05169	0.014913
0.02	0.517947	0.95487	0.0124897	0.04513	0.0124897
0.02	0.568987	0.95463	0.0116919	0.04537	0.0116919
0.02	0.625055	0.95916	0.0112759	0.04084	0.0112759
0.02	0.686649	0.96352	0.0103362	0.03648	0.0103362
0.02	0.754312	0.96485	0.00970512	0.03515	0.00970512
0.02	0.828643	0.96519	0.00856195	0.03481	0.00856195
0.02	0.910298	0.9665	0.00859469	0.0335	0.00859469
0.02	1	0.97085	0.00838635	0.02915	0.00838635

## Sheet: Figure 2-supplement 1c,d
kon (frame-1)	koff (frame-1)	Occupancy of State 1	Occupancy of State 2	Idealizatiton Accuracy
				no Viterbi	Viterbi
0.02	0.01	0.195	0.805	1	1
0.02	0.01	0.21	0.79	1	1
0.02	0.01	0.457	0.543	0.833333	1
0.02	0.01	0.224	0.776	0.666667	1
0.02	0.01	0.329	0.671	0.652174	1
0.02	0.01	0.29	0.71	1	1
0.02	0.01	0.27	0.73	1	1
0.02	0.01	0.257	0.743	1	1
0.02	0.01	0.252	0.748	1	1
0.02	0.01	0.396	0.604	1	1
0.02	0.01	0.337	0.663	0.733333	1
0.02	0.01	0.28	0.72	1	1
0.02	0.01	0.409	0.591	0.809524	1
0.02	0.01	0.406	0.594	1	1
0.02	0.01	0.266	0.734	1	1
0.02	0.01	0.283	0.717	1	1
0.02	0.01	0.261	0.739	1	1
0.02	0.01	0.33	0.67	0.764706	1
0.02	0.01	0.304	0.696	1	1
0.02	0.01	0.328	0.672	0.714286	1
0.02	0.01	0.232	0.768	0.6	1
0.02	0.01	0.493	0.507	1	1
0.02	0.01	0.506	0.494	0.789474	0.789474
0.02	0.01	0.425	0.575	1	1
0.02	0.01	0.31	0.69	1	1
0.02	0.01	0.286	0.714	1	1
0.02	0.01	0.228	0.772	1	1
0.02	0.01	0.213	0.787	0.666667	1
0.02	0.01	0.411	0.589	1	1
0.02	0.01	0.259	0.741	0.555556	1
0.02	0.01	0.342	0.658	1	1
0.02	0.01	0.327	0.673	1	1
0.02	0.01	0.417	0.583	0.789474	1
0.02	0.01	0.312	0.688	0.777778	1
0.02	0.01	0.28	0.72	1	1
0.02	0.01	0.314	0.686	1	1
0.02	0.01	0.218	0.782	1	1
0.02	0.01	0.49	0.51	0.777778	1
0.02	0.01	0.356	0.644	1	1
0.02	0.01	0.222	0.778	1	1
0.02	0.01	0.211	0.789	0.818182	1
0.02	0.01	0.266	0.734	0.809524	1
0.02	0.01	0.332	0.668	1	1
0.02	0.01	0.399	0.601	1	1
0.02	0.01	0.41	0.59	0.733333	1
0.02	0.01	0.59	0.41	1	1
0.02	0.01	0.355	0.645	0.692308	1
0.02	0.01	0.255	0.745	0.75	1
0.02	0.01	0.441	0.559	0.636364	1
0.02	0.01	0.356	0.644	1	1
0.02	0.01	0.354	0.646	1	1
0.02	0.01	0.389	0.611	1	1
0.02	0.01	0.605	0.395	0.789474	1
0.02	0.01	0.272	0.728	0.789474	1
0.02	0.01	0.299	0.701	1	1
0.02	0.01	0.253	0.747	0.733333	1
0.02	0.01	0.298	0.702	0.84	1
0.02	0.01	0.195	0.805	1	1
0.02	0.01	0.342	0.658	1	1
0.02	0.01	0.34	0.66	1	1
0.02	0.01	0.299	0.701	0.777778	1
0.02	0.01	0.436	0.564	0.777778	1
0.02	0.01	0.369	0.631	1	1
0.02	0.01	0.464	0.536	0.68	1
0.02	0.01	0.082	0.918	0.714286	1
0.02	0.01	0.248	0.752	0.75	1
0.02	0.01	0.277	0.723	1	1
0.02	0.01	0.488	0.512	1	1
0.02	0.01	0.439	0.561	1	1
0.02	0.01	0.273	0.727	1	1
0.02	0.01	0.355	0.645	1	1
0.02	0.01	0.347	0.653	1	1
0.02	0.01	0.199	0.801	1	1
0.02	0.01	0.435	0.565	0.666667	1
0.02	0.01	0.306	0.694	0.5	0.733333
0.02	0.01	0.227	0.773	1	1
0.02	0.01	0.524	0.476	1	1
0.02	0.01	0.379	0.621	1	1
0.02	0.01	0.559	0.441	1	1
0.02	0.01	0.569	0.431	0.75	1
0.02	0.01	0.149	0.851	1	1
0.02	0.01	0.384	0.616	1	1
0.02	0.01	0.322	0.678	1	1
0.02	0.01	0.377	0.623	1	1
0.02	0.01	0.176	0.824	1	1
0.02	0.01	0.244	0.756	0.714286	1
0.02	0.01	0.17	0.83	1	1
0.02	0.01	0.394	0.606	1	1
0.02	0.01	0.227	0.773	1	1
0.02	0.01	0.568	0.432	1	1
0.02	0.01	0.438	0.562	0.733333	1
0.02	0.01	0.162	0.838	1	1
0.02	0.01	0.208	0.792	0.4	1
0.02	0.01	0.341	0.659	1	1
0.02	0.01	0.371	0.629	1	1
0.02	0.01	0.29	0.71	1	1
0.02	0.01	0.387	0.613	1	1
0.02	0.01	0.395	0.605	0.5	1
0.02	0.01	0.443	0.557	0.692308	1
0.02	0.01	0.427	0.573	1	1
0.02	0.0109854	0.166	0.834	1	1
0.02	0.0109854	0.386	0.614	1	1
0.02	0.0109854	0.367	0.633	1	1
0.02	0.0109854	0.157	0.843	1	1
0.02	0.0109854	0.279	0.721	1	1
0.02	0.0109854	0.266	0.734	1	1
0.02	0.0109854	0.292	0.708	1	1
0.02	0.0109854	0.532	0.468	0.764706	1
0.02	0.0109854	0.424	0.576	1	1
0.02	0.0109854	0.553	0.447	1	1
0.02	0.0109854	0.402	0.598	1	1
0.02	0.0109854	0.362	0.638	0.5	1
0.02	0.0109854	0.182	0.818	0.692308	1
0.02	0.0109854	0.288	0.712	0.928571	1
0.02	0.0109854	0.343	0.657	0.777778	1
0.02	0.0109854	0.29	0.71	1	1
0.02	0.0109854	0.506	0.494	1	1
0.02	0.0109854	0.411	0.589	0.8	1
0.02	0.0109854	0.325	0.675	0.809524	1
0.02	0.0109854	0.219	0.781	0.416667	1
0.02	0.0109854	0.211	0.789	1	1
0.02	0.0109854	0.494	0.506	0.833333	1
0.02	0.0109854	0.341	0.659	0.764706	1
0.02	0.0109854	0.195	0.805	0.666667	1
0.02	0.0109854	0.377	0.623	1	1
0.02	0.0109854	0.361	0.639	1	1
0.02	0.0109854	0.438	0.562	0.692308	1
0.02	0.0109854	0.472	0.528	1	1
0.02	0.0109854	0.208	0.792	0.555556	1
0.02	0.0109854	0.496	0.504	0.764706	0.764706
0.02	0.0109854	0.366	0.634	1	1
0.02	0.0109854	0.412	0.588	1	1
0.02	0.0109854	0.297	0.703	1	1
0.02	0.0109854	0.337	0.663	0.789474	0.789474
0.02	0.0109854	0.28	0.72	0.777778	1
0.02	0.0109854	0.48	0.52	0.73913	1
0.02	0.0109854	0.438	0.562	0.75	1
0.02	0.0109854	0.374	0.626	1	1
0.02	0.0109854	0.419	0.581	1	1
0.02	0.0109854	0.274	0.726	1	1
0.02	0.0109854	0.473	0.527	1	1
0.02	0.0109854	0.242	0.758	1	1
0.02	0.0109854	0.209	0.791	1	1
0.02	0.0109854	0.415	0.585	1	1
0.02	0.0109854	0.152	0.848	0.666667	1
0.02	0.0109854	0.301	0.699	0.75	1
0.02	0.0109854	0.445	0.555	1	1
0.02	0.0109854	0.155	0.845	1	1
0.02	0.0109854	0.409	0.591	1	0.75
0.02	0.0109854	0.286	0.714	1	1
0.02	0.0109854	0.269	0.731	0.764706	0.764706
0.02	0.0109854	0.188	0.812	0.894737	1
0.02	0.0109854	0.349	0.651	1	1
0.02	0.0109854	0.207	0.793	0.5	1
0.02	0.0109854	0.258	0.742	0.733333	1
0.02	0.0109854	0.273	0.727	0.714286	1
0.02	0.0109854	0.337	0.663	1	1
0.02	0.0109854	0.429	0.571	1	1
0.02	0.0109854	0.365	0.635	1	1
0.02	0.0109854	0.255	0.745	1	1
0.02	0.0109854	0.43	0.57	1	1
0.02	0.0109854	0.313	0.687	0.777778	1
0.02	0.0109854	0.438	0.562	1	1
0.02	0.0109854	0.543	0.457	1	1
0.02	0.0109854	0.356	0.644	1	1
0.02	0.0109854	0.364	0.636	1	1
0.02	0.0109854	0.254	0.746	1	1
0.02	0.0109854	0.136	0.864	0.809524	1
0.02	0.0109854	0.276	0.724	0.8	0.9
0.02	0.0109854	0.242	0.758	1	1
0.02	0.0109854	0.492	0.508	1	1
0.02	0.0109854	0.299	0.701	1	1
0.02	0.0109854	0.353	0.647	1	1
0.02	0.0109854	0.368	0.632	1	1
0.02	0.0109854	0.392	0.608	1	1
0.02	0.0109854	0.431	0.569	0.733333	1
0.02	0.0109854	0.305	0.695	0.8	1
0.02	0.0109854	0.445	0.555	1	1
0.02	0.0109854	0.299	0.701	1	1
0.02	0.0109854	0.341	0.659	1	1
0.02	0.0109854	0.296	0.704	0.777778	1
0.02	0.0109854	0.124	0.876	0.692308	1
0.02	0.0109854	0.35	0.65	0.666667	0.666667
0.02	0.0109854	0.485	0.515	0.818182	1
0.02	0.0109854	0.354	0.646	1	1
0.02	0.0109854	0.299	0.701	0.8125	1
0.02	0.0109854	0.5	0.5	0.73913	1
0.02	0.0109854	0.572	0.428	0.642857	1
0.02	0.0109854	0.386	0.614	0.692308	1
0.02	0.0109854	0.351	0.649	1	1
0.02	0.0109854	0.366	0.634	1	1
0.02	0.0109854	0.548	0.452	0.666667	0.666667
0.02	0.0109854	0.393	0.607	1	1
0.02	0.0109854	0.235	0.765	1	1
0.02	0.0109854	0.302	0.698	0.764706	1
0.02	0.0109854	0.518	0.482	0.666667	1
0.02	0.0109854	0.448	0.552	0.666667	1
0.02	0.0109854	0.433	0.567	1	1
0.02	0.0109854	0.288	0.712	1	1
0.02	0.0109854	0.282	0.718	0.846154	1
0.02	0.0120679	0.348	0.652	0.826087	0.826087
0.02	0.0120679	0.582	0.418	1	1
0.02	0.0120679	0.49	0.51	0.8	1
0.02	0.0120679	0.263	0.737	1	1
0.02	0.0120679	0.218	0.782	0.777778	1
0.02	0.0120679	0.374	0.626	0.692308	1
0.02	0.0120679	0.221	0.779	0.733333	1
0.02	0.0120679	0.364	0.636	1	1
0.02	0.0120679	0.239	0.761	1	1
0.02	0.0120679	0.478	0.522	0.8	1
0.02	0.0120679	0.524	0.476	1	0.733333
0.02	0.0120679	0.276	0.724	1	1
0.02	0.0120679	0.798	0.202	1	1
0.02	0.0120679	0.188	0.812	1	1
0.02	0.0120679	0.167	0.833	0.764706	1
0.02	0.0120679	0.173	0.827	1	1
0.02	0.0120679	0.562	0.438	1	1
0.02	0.0120679	0.206	0.794	1	1
0.02	0.0120679	0.187	0.813	0.764706	1
0.02	0.0120679	0.539	0.461	1	1
0.02	0.0120679	0.302	0.698	0.846154	1
0.02	0.0120679	0.163	0.837	0.75	0.75
0.02	0.0120679	0.406	0.594	0.84	0.84
0.02	0.0120679	0.417	0.583	1	1
0.02	0.0120679	0.375	0.625	1	1
0.02	0.0120679	0.309	0.691	0.75	1
0.02	0.0120679	0.277	0.723	0.909091	1
0.02	0.0120679	0.231	0.769	0.75	1
0.02	0.0120679	0.346	0.654	0.733333	1
0.02	0.0120679	0.514	0.486	1	1
0.02	0.0120679	0.343	0.657	1	1
0.02	0.0120679	0.213	0.787	1	1
0.02	0.0120679	0.257	0.743	0.764706	1
0.02	0.0120679	0.316	0.684	0.8	1
0.02	0.0120679	0.446	0.554	0.809524	0.809524
0.02	0.0120679	0.43	0.57	0.818182	1
0.02	0.0120679	0.464	0.536	1	1
0.02	0.0120679	0.418	0.582	1	1
0.02	0.0120679	0.266	0.734	0.764706	1
0.02	0.0120679	0.207	0.793	1	1
0.02	0.0120679	0.231	0.769	0.826087	1
0.02	0.0120679	0.332	0.668	0.809524	1
0.02	0.0120679	0.458	0.542	1	1
0.02	0.0120679	0.401	0.599	1	1
0.02	0.0120679	0.342	0.658	1	1
0.02	0.0120679	0.21	0.79	0.8	1
0.02	0.0120679	0.282	0.718	0.555556	1
0.02	0.0120679	0.259	0.741	1	1
0.02	0.0120679	0.275	0.725	1	1
0.02	0.0120679	0.506	0.494	1	1
0.02	0.0120679	0.321	0.679	0.733333	1
0.02	0.0120679	0.206	0.794	1	1
0.02	0.0120679	0.301	0.699	1	1
0.02	0.0120679	0.472	0.528	0.642857	1
0.02	0.0120679	0.296	0.704	1	1
0.02	0.0120679	0.443	0.557	0.846154	1
0.02	0.0120679	0.273	0.727	1	0.764706
0.02	0.0120679	0.617	0.383	1	1
0.02	0.0120679	0.237	0.763	0.75	0.75
0.02	0.0120679	0.41	0.59	0.809524	0.809524
0.02	0.0120679	0.391	0.609	1	1
0.02	0.0120679	0.733	0.267	1	1
0.02	0.0120679	0.387	0.613	0.882353	1
0.02	0.0120679	0.411	0.589	1	1
0.02	0.0120679	0.24	0.76	0.5	1
0.02	0.0120679	0.673	0.327	1	1
0.02	0.0120679	0.254	0.746	1	1
0.02	0.0120679	0.51	0.49	1	1
0.02	0.0120679	0.282	0.718	0.833333	1
0.02	0.0120679	0.521	0.479	0.777778	1
0.02	0.0120679	0.383	0.617	1	0.809524
0.02	0.0120679	0.3	0.7	1	1
0.02	0.0120679	0.442	0.558	1	1
0.02	0.0120679	0.547	0.453	1	1
0.02	0.0120679	0.285	0.715	1	1
0.02	0.0120679	0.408	0.592	1	1
0.02	0.0120679	0.333	0.667	1	1
0.02	0.0120679	0.293	0.707	1	1
0.02	0.0120679	0.44	0.56	1	1
0.02	0.0120679	0.351	0.649	0.809524	1
0.02	0.0120679	0.474	0.526	0.789474	1
0.02	0.0120679	0.182	0.818	1	1
0.02	0.0120679	0.3	0.7	1	1
0.02	0.0120679	0.443	0.557	1	1
0.02	0.0120679	0.446	0.554	1	1
0.02	0.0120679	0.361	0.639	1	1
0.02	0.0120679	0.37	0.63	1	1
0.02	0.0120679	0.162	0.838	1	1
0.02	0.0120679	0.343	0.657	1	1
0.02	0.0120679	0.371	0.629	0.733333	1
0.02	0.0120679	0.338	0.662	1	1
0.02	0.0120679	0.282	0.718	1	1
0.02	0.0120679	0.274	0.726	1	1
0.02	0.0120679	0.28	0.72	1	1
0.02	0.0120679	0.506	0.494	1	1
0.02	0.0120679	0.49	0.51	1	1
0.02	0.0120679	0.394	0.606	0.9	1
0.02	0.0120679	0.302	0.698	1	0.9375
0.02	0.0120679	0.342	0.658	1	1
0.02	0.0120679	0.346	0.654	1	1
0.02	0.0132571	0.383	0.617	1	1
0.02	0.0132571	0.596	0.404	1	1
0.02	0.0132571	0.427	0.573	0.75	1
0.02	0.0132571	0.437	0.563	0.733333	1
0.02	0.0132571	0.488	0.512	1	1
0.02	0.0132571	0.383	0.617	0.68	1
0.02	0.0132571	0.31	0.69	1	1
0.02	0.0132571	0.506	0.494	1	1
0.02	0.0132571	0.395	0.605	1	1
0.02	0.0132571	0.269	0.731	1	1
0.02	0.0132571	0.353	0.647	1	1
0.02	0.0132571	0.438	0.562	0.75	1
0.02	0.0132571	0.385	0.615	0.894737	1
0.02	0.0132571	0.348	0.652	1	1
0.02	0.0132571	0.402	0.598	1	1
0.02	0.0132571	0.33	0.67	0.714286	1
0.02	0.0132571	0.435	0.565	0.833333	1
0.02	0.0132571	0.306	0.694	1	1
0.02	0.0132571	0.394	0.606	0.692308	0.809524
0.02	0.0132571	0.373	0.627	0.714286	0.714286
0.02	0.0132571	0.275	0.725	1	1
0.02	0.0132571	0.142	0.858	1	1
0.02	0.0132571	0.552	0.448	0.826087	1
0.02	0.0132571	0.297	0.703	1	1
0.02	0.0132571	0.571	0.429	0.764706	1
0.02	0.0132571	0.222	0.778	0.809524	1
0.02	0.0132571	0.328	0.672	0.777778	1
0.02	0.0132571	0.344	0.656	1	1
0.02	0.0132571	0.372	0.628	1	1
0.02	0.0132571	0.57	0.43	0.619048	1
0.02	0.0132571	0.482	0.518	1	1
0.02	0.0132571	0.524	0.476	0.84	1
0.02	0.0132571	0.446	0.554	1	1
0.02	0.0132571	0.478	0.522	1	1
0.02	0.0132571	0.452	0.548	1	1
0.02	0.0132571	0.367	0.633	0.666667	0.826087
0.02	0.0132571	0.302	0.698	0.785714	1
0.02	0.0132571	0.537	0.463	1	1
0.02	0.0132571	0.734	0.266	1	1
0.02	0.0132571	0.317	0.683	0.928571	1
0.02	0.0132571	0.216	0.784	0.571429	1
0.02	0.0132571	0.258	0.742	1	1
0.02	0.0132571	0.321	0.679	1	1
0.02	0.0132571	0.431	0.569	1	1
0.02	0.0132571	0.377	0.623	0.8	0.8
0.02	0.0132571	0.467	0.533	0.666667	1
0.02	0.0132571	0.269	0.731	1	1
0.02	0.0132571	0.451	0.549	1	1
0.02	0.0132571	0.255	0.745	1	1
0.02	0.0132571	0.415	0.585	0.818182	0.818182
0.02	0.0132571	0.5	0.5	1	1
0.02	0.0132571	0.399	0.601	0.846154	1
0.02	0.0132571	0.489	0.511	1	1
0.02	0.0132571	0.451	0.549	1	1
0.02	0.0132571	0.464	0.536	1	1
0.02	0.0132571	0.256	0.744	0.818182	1
0.02	0.0132571	0.264	0.736	0.714286	1
0.02	0.0132571	0.348	0.652	1	1
0.02	0.0132571	0.192	0.808	1	1
0.02	0.0132571	0.49	0.51	1	1
0.02	0.0132571	0.293	0.707	1	1
0.02	0.0132571	0.322	0.678	0.789474	1
0.02	0.0132571	0.37	0.63	1	1
0.02	0.0132571	0.436	0.564	0.809524	1
0.02	0.0132571	0.345	0.655	0.764706	1
0.02	0.0132571	0.526	0.474	1	1
0.02	0.0132571	0.445	0.555	1	1
0.02	0.0132571	0.185	0.815	1	1
0.02	0.0132571	0.508	0.492	0.789474	0.789474
0.02	0.0132571	0.317	0.683	0.733333	1
0.02	0.0132571	0.447	0.553	1	1
0.02	0.0132571	0.329	0.671	0.833333	1
0.02	0.0132571	0.361	0.639	1	1
0.02	0.0132571	0.251	0.749	1	1
0.02	0.0132571	0.264	0.736	0.333333	1
0.02	0.0132571	0.493	0.507	0.75	1
0.02	0.0132571	0.304	0.696	1	1
0.02	0.0132571	0.349	0.651	1	0.714286
0.02	0.0132571	0.521	0.479	0.652174	0.8
0.02	0.0132571	0.463	0.537	1	1
0.02	0.0132571	0.401	0.599	1	1
0.02	0.0132571	0.501	0.499	0.789474	1
0.02	0.0132571	0.337	0.663	0.8	1
0.02	0.0132571	0.59	0.41	0.894737	1
0.02	0.0132571	0.114	0.886	1	1
0.02	0.0132571	0.384	0.616	1	1
0.02	0.0132571	0.21	0.79	0.789474	1
0.02	0.0132571	0.415	0.585	0.714286	0.714286
0.02	0.0132571	0.306	0.694	0.75	1
0.02	0.0132571	0.34	0.66	0.619048	0.652174
0.02	0.0132571	0.262	0.738	0.75	1
0.02	0.0132571	0.377	0.623	1	1
0.02	0.0132571	0.233	0.767	0.789474	1
0.02	0.0132571	0.544	0.456	1	1
0.02	0.0132571	0.436	0.564	1	1
0.02	0.0132571	0.256	0.744	0.764706	1
0.02	0.0132571	0.402	0.598	0.733333	1
0.02	0.0132571	0.376	0.624	1	1
0.02	0.0132571	0.334	0.666	0.777778	1
0.02	0.0132571	0.261	0.739	1	1
0.02	0.0145635	0.484	0.516	0.809524	1
0.02	0.0145635	0.464	0.536	1	1
0.02	0.0145635	0.409	0.591	0.75	1
0.02	0.0145635	0.182	0.818	1	1
0.02	0.0145635	0.328	0.672	1	1
0.02	0.0145635	0.316	0.684	0.84	0.84
0.02	0.0145635	0.493	0.507	0.714286	0.851852
0.02	0.0145635	0.346	0.654	1	1
0.02	0.0145635	0.397	0.603	1	1
0.02	0.0145635	0.521	0.479	0.809524	1
0.02	0.0145635	0.409	0.591	0.764706	1
0.02	0.0145635	0.412	0.588	0.789474	1
0.02	0.0145635	0.658	0.342	0.764706	1
0.02	0.0145635	0.636	0.364	0.857143	1
0.02	0.0145635	0.293	0.707	0.8	1
0.02	0.0145635	0.343	0.657	0.764706	1
0.02	0.0145635	0.461	0.539	1	1
0.02	0.0145635	0.417	0.583	1	1
0.02	0.0145635	0.448	0.552	0.684211	0.777778
0.02	0.0145635	0.28	0.72	1	1
0.02	0.0145635	0.533	0.467	1	1
0.02	0.0145635	0.286	0.714	0.8	1
0.02	0.0145635	0.405	0.595	0.777778	1
0.02	0.0145635	0.531	0.469	0.833333	1
0.02	0.0145635	0.335	0.665	0.789474	1
0.02	0.0145635	0.495	0.505	1	1
0.02	0.0145635	0.389	0.611	1	1
0.02	0.0145635	0.416	0.584	0.8	1
0.02	0.0145635	0.287	0.713	0.8	1
0.02	0.0145635	0.592	0.408	0.826087	1
0.02	0.0145635	0.314	0.686	1	1
0.02	0.0145635	0.442	0.558	1	1
0.02	0.0145635	0.393	0.607	1	1
0.02	0.0145635	0.21	0.79	1	1
0.02	0.0145635	0.285	0.715	1	1
0.02	0.0145635	0.42	0.58	1	1
0.02	0.0145635	0.44	0.56	1	1
0.02	0.0145635	0.344	0.656	1	1
0.02	0.0145635	0.512	0.488	1	1
0.02	0.0145635	0.377	0.623	1	1
0.02	0.0145635	0.135	0.865	1	1
0.02	0.0145635	0.512	0.488	0.75	1
0.02	0.0145635	0.589	0.411	0.8	1
0.02	0.0145635	0.284	0.716	0.84	1
0.02	0.0145635	0.488	0.512	0.714286	1
0.02	0.0145635	0.612	0.388	1	1
0.02	0.0145635	0.266	0.734	0.8	1
0.02	0.0145635	0.644	0.356	1	1
0.02	0.0145635	0.395	0.605	0.75	1
0.02	0.0145635	0.605	0.395	1	1
0.02	0.0145635	0.467	0.533	0.6	1
0.02	0.0145635	0.679	0.321	1	1
0.02	0.0145635	0.301	0.699	1	1
0.02	0.0145635	0.343	0.657	1	1
0.02	0.0145635	0.291	0.709	0.851852	1
0.02	0.0145635	0.23	0.77	1	1
0.02	0.0145635	0.534	0.466	1	1
0.02	0.0145635	0.463	0.537	1	1
0.02	0.0145635	0.247	0.753	0.818182	1
0.02	0.0145635	0.421	0.579	0.733333	0.733333
0.02	0.0145635	0.403	0.597	0.870968	1
0.02	0.0145635	0.389	0.611	1	1
0.02	0.0145635	0.576	0.424	1	1
0.02	0.0145635	0.558	0.442	1	1
0.02	0.0145635	0.514	0.486	0.866667	1
0.02	0.0145635	0.398	0.602	1	1
0.02	0.0145635	0.132	0.868	0.578947	1
0.02	0.0145635	0.409	0.591	1	1
0.02	0.0145635	0.267	0.733	1	1
0.02	0.0145635	0.285	0.715	1	1
0.02	0.0145635	0.374	0.626	1	1
0.02	0.0145635	0.384	0.616	1	1
0.02	0.0145635	0.575	0.425	1	1
0.02	0.0145635	0.526	0.474	0.571429	1
0.02	0.0145635	0.482	0.518	0.8	1
0.02	0.0145635	0.627	0.373	1	1
0.02	0.0145635	0.702	0.298	1	1
0.02	0.0145635	0.375	0.625	1	1
0.02	0.0145635	0.536	0.464	0.833333	0.833333
0.02	0.0145635	0.375	0.625	1	1
0.02	0.0145635	0.347	0.653	0.84	0.84
0.02	0.0145635	0.536	0.464	0.724138	0.857143
0.02	0.0145635	0.444	0.556	1	1
0.02	0.0145635	0.447	0.553	1	1
0.02	0.0145635	0.333	0.667	0.789474	1
0.02	0.0145635	0.436	0.564	1	1
0.02	0.0145635	0.5	0.5	1	1
0.02	0.0145635	0.442	0.558	1	1
0.02	0.0145635	0.461	0.539	1	1
0.02	0.0145635	0.404	0.596	1	1
0.02	0.0145635	0.317	0.683	1	1
0.02	0.0145635	0.436	0.564	1	1
0.02	0.0145635	0.577	0.423	1	1
0.02	0.0145635	0.432	0.568	1	1
0.02	0.0145635	0.408	0.592	1	1
0.02	0.0145635	0.211	0.789	0.809524	1
0.02	0.0145635	0.264	0.736	1	1
0.02	0.0145635	0.274	0.726	1	1
0.02	0.0145635	0.492	0.508	0.8	0.818182
0.02	0.0145635	0.197	0.803	0.666667	1
0.02	0.0159986	0.618	0.382	0.833333	1
0.02	0.0159986	0.509	0.491	0.8	1
0.02	0.0159986	0.241	0.759	1	1
0.02	0.0159986	0.362	0.638	0.818182	1
0.02	0.0159986	0.373	0.627	1	1
0.02	0.0159986	0.375	0.625	0.789474	1
0.02	0.0159986	0.503	0.497	0.666667	1
0.02	0.0159986	0.207	0.793	0.692308	1
0.02	0.0159986	0.284	0.716	1	1
0.02	0.0159986	0.382	0.618	1	1
0.02	0.0159986	0.379	0.621	1	1
0.02	0.0159986	0.147	0.853	0.818182	1
0.02	0.0159986	0.181	0.819	1	1
0.02	0.0159986	0.343	0.657	1	1
0.02	0.0159986	0.381	0.619	0.692308	0.692308
0.02	0.0159986	0.48	0.52	1	1
0.02	0.0159986	0.412	0.588	1	1
0.02	0.0159986	0.294	0.706	1	1
0.02	0.0159986	0.555	0.445	1	1
0.02	0.0159986	0.469	0.531	1	1
0.02	0.0159986	0.659	0.341	1	1
0.02	0.0159986	0.468	0.532	0.833333	1
0.02	0.0159986	0.38	0.62	1	1
0.02	0.0159986	0.466	0.534	1	1
0.02	0.0159986	0.49	0.51	1	1
0.02	0.0159986	0.264	0.736	0.789474	1
0.02	0.0159986	0.299	0.701	0.764706	1
0.02	0.0159986	0.25	0.75	0.818182	1
0.02	0.0159986	0.284	0.716	1	1
0.02	0.0159986	0.253	0.747	1	1
0.02	0.0159986	0.495	0.505	1	1
0.02	0.0159986	0.521	0.479	0.846154	1
0.02	0.0159986	0.309	0.691	0.615385	0.84
0.02	0.0159986	0.468	0.532	1	1
0.02	0.0159986	0.349	0.651	1	1
0.02	0.0159986	0.463	0.537	0.913043	1
0.02	0.0159986	0.5	0.5	1	1
0.02	0.0159986	0.205	0.795	1	1
0.02	0.0159986	0.657	0.343	0.863636	1
0.02	0.0159986	0.508	0.492	1	1
0.02	0.0159986	0.425	0.575	0.833333	1
0.02	0.0159986	0.449	0.551	1	1
0.02	0.0159986	0.366	0.634	0.730769	1
0.02	0.0159986	0.572	0.428	1	1
0.02	0.0159986	0.444	0.556	0.777778	1
0.02	0.0159986	0.512	0.488	0.75	1
0.02	0.0159986	0.606	0.394	0.789474	1
0.02	0.0159986	0.471	0.529	0.818182	0.818182
0.02	0.0159986	0.484	0.516	0.818182	1
0.02	0.0159986	0.424	0.576	1	1
0.02	0.0159986	0.393	0.607	0.789474	1
0.02	0.0159986	0.485	0.515	1	1
0.02	0.0159986	0.421	0.579	1	1
0.02	0.0159986	0.177	0.823	0.764706	1
0.02	0.0159986	0.434	0.566	1	1
0.02	0.0159986	0.456	0.544	0.652174	1
0.02	0.0159986	0.452	0.548	0.75	1
0.02	0.0159986	0.631	0.369	1	1
0.02	0.0159986	0.369	0.631	0.925926	1
0.02	0.0159986	0.34	0.66	0.777778	1
0.02	0.0159986	0.181	0.819	0.714286	1
0.02	0.0159986	0.633	0.367	0.8	1
0.02	0.0159986	0.435	0.565	1	1
0.02	0.0159986	0.54	0.46	1	1
0.02	0.0159986	0.603	0.397	0.809524	1
0.02	0.0159986	0.48	0.52	1	1
0.02	0.0159986	0.225	0.775	1	0.75
0.02	0.0159986	0.532	0.468	1	1
0.02	0.0159986	0.391	0.609	1	1
0.02	0.0159986	0.212	0.788	0.733333	1
0.02	0.0159986	0.61	0.39	1	1
0.02	0.0159986	0.45	0.55	0.84	1
0.02	0.0159986	0.304	0.696	0.8	0.8
0.02	0.0159986	0.567	0.433	1	1
0.02	0.0159986	0.53	0.47	1	1
0.02	0.0159986	0.281	0.719	1	1
0.02	0.0159986	0.478	0.522	0.9375	0.9375
0.02	0.0159986	0.363	0.637	1	1
0.02	0.0159986	0.441	0.559	0.857143	1
0.02	0.0159986	0.563	0.437	0.666667	1
0.02	0.0159986	0.485	0.515	0.777778	1
0.02	0.0159986	0.355	0.645	1	1
0.02	0.0159986	0.41	0.59	0.764706	1
0.02	0.0159986	0.564	0.436	1	1
0.02	0.0159986	0.512	0.488	0.736842	0.6
0.02	0.0159986	0.434	0.566	1	1
0.02	0.0159986	0.529	0.471	1	1
0.02	0.0159986	0.495	0.505	0.928571	1
0.02	0.0159986	0.325	0.675	0.818182	0.818182
0.02	0.0159986	0.346	0.654	1	1
0.02	0.0159986	0.465	0.535	0.692308	1
0.02	0.0159986	0.549	0.451	1	1
0.02	0.0159986	0.595	0.405	0.851852	1
0.02	0.0159986	0.566	0.434	1	1
0.02	0.0159986	0.374	0.626	1	1
0.02	0.0159986	0.576	0.424	1	1
0.02	0.0159986	0.338	0.662	1	1
0.02	0.0159986	0.586	0.414	0.826087	1
0.02	0.0159986	0.684	0.316	1	1
0.02	0.0159986	0.408	0.592	1	1
0.02	0.0175751	0.446	0.554	0.8	1
0.02	0.0175751	0.568	0.432	0.818182	1
0.02	0.0175751	0.34	0.66	1	1
0.02	0.0175751	0.455	0.545	0.5	0.8
0.02	0.0175751	0.563	0.437	0.833333	1
0.02	0.0175751	0.403	0.597	1	1
0.02	0.0175751	0.448	0.552	0.8	1
0.02	0.0175751	0.314	0.686	0.789474	0.809524
0.02	0.0175751	0.404	0.596	0.733333	1
0.02	0.0175751	0.592	0.408	1	1
0.02	0.0175751	0.418	0.582	1	1
0.02	0.0175751	0.405	0.595	1	1
0.02	0.0175751	0.497	0.503	0.789474	1
0.02	0.0175751	0.614	0.386	1	1
0.02	0.0175751	0.409	0.591	1	1
0.02	0.0175751	0.426	0.574	0.692308	1
0.02	0.0175751	0.324	0.676	0.9375	0.882353
0.02	0.0175751	0.625	0.375	1	1
0.02	0.0175751	0.539	0.461	1	1
0.02	0.0175751	0.293	0.707	1	1
0.02	0.0175751	0.433	0.567	1	1
0.02	0.0175751	0.419	0.581	1	0.933333
0.02	0.0175751	0.509	0.491	1	1
0.02	0.0175751	0.482	0.518	0.851852	1
0.02	0.0175751	0.63	0.37	0.809524	1
0.02	0.0175751	0.326	0.674	1	1
0.02	0.0175751	0.461	0.539	0.8	1
0.02	0.0175751	0.467	0.533	1	1
0.02	0.0175751	0.474	0.526	1	1
0.02	0.0175751	0.349	0.651	0.478261	1
0.02	0.0175751	0.393	0.607	1	1
0.02	0.0175751	0.575	0.425	1	1
0.02	0.0175751	0.46	0.54	1	1
0.02	0.0175751	0.281	0.719	0.789474	1
0.02	0.0175751	0.43	0.57	0.4	1
0.02	0.0175751	0.488	0.512	0.84	1
0.02	0.0175751	0.475	0.525	0.833333	1
0.02	0.0175751	0.659	0.341	0.789474	0.789474
0.02	0.0175751	0.534	0.466	1	1
0.02	0.0175751	0.554	0.446	0.958333	1
0.02	0.0175751	0.451	0.549	1	1
0.02	0.0175751	0.422	0.578	1	1
0.02	0.0175751	0.45	0.55	1	1
0.02	0.0175751	0.201	0.799	0.8	1
0.02	0.0175751	0.321	0.679	0.826087	1
0.02	0.0175751	0.461	0.539	0.666667	1
0.02	0.0175751	0.471	0.529	1	1
0.02	0.0175751	0.27	0.73	0.75	1
0.02	0.0175751	0.716	0.284	1	1
0.02	0.0175751	0.365	0.635	0.818182	0.833333
0.02	0.0175751	0.348	0.652	1	1
0.02	0.0175751	0.496	0.504	1	1
0.02	0.0175751	0.585	0.415	1	1
0.02	0.0175751	0.591	0.409	1	1
0.02	0.0175751	0.497	0.503	0.833333	1
0.02	0.0175751	0.606	0.394	0.789474	1
0.02	0.0175751	0.604	0.396	1	1
0.02	0.0175751	0.571	0.429	1	1
0.02	0.0175751	0.309	0.691	1	1
0.02	0.0175751	0.443	0.557	1	1
0.02	0.0175751	0.501	0.499	1	1
0.02	0.0175751	0.414	0.586	1	1
0.02	0.0175751	0.439	0.561	0.666667	0.826087
0.02	0.0175751	0.512	0.488	0.652174	1
0.02	0.0175751	0.466	0.534	1	1
0.02	0.0175751	0.371	0.629	0.529412	0.714286
0.02	0.0175751	0.579	0.421	0.666667	0.809524
0.02	0.0175751	0.534	0.466	1	1
0.02	0.0175751	0.536	0.464	0.777778	1
0.02	0.0175751	0.252	0.748	1	1
0.02	0.0175751	0.426	0.574	1	1
0.02	0.0175751	0.444	0.556	0.785714	0.846154
0.02	0.0175751	0.441	0.559	1	1
0.02	0.0175751	0.324	0.676	0.652174	1
0.02	0.0175751	0.416	0.584	0.8	1
0.02	0.0175751	0.43	0.57	0.84	1
0.02	0.0175751	0.329	0.671	1	1
0.02	0.0175751	0.507	0.493	1	1
0.02	0.0175751	0.551	0.449	1	1
0.02	0.0175751	0.321	0.679	0.826087	1
0.02	0.0175751	0.415	0.585	1	1
0.02	0.0175751	0.211	0.789	0.851852	1
0.02	0.0175751	0.571	0.429	0.764706	0.764706
0.02	0.0175751	0.303	0.697	0.789474	1
0.02	0.0175751	0.505	0.495	0.666667	1
0.02	0.0175751	0.355	0.645	0.777778	1
0.02	0.0175751	0.538	0.462	0.733333	1
0.02	0.0175751	0.547	0.453	1	1
0.02	0.0175751	0.772	0.228	1	1
0.02	0.0175751	0.676	0.324	1	1
0.02	0.0175751	0.415	0.585	0.809524	1
0.02	0.0175751	0.457	0.543	1	1
0.02	0.0175751	0.522	0.478	0.84	1
0.02	0.0175751	0.602	0.398	0.789474	0.789474
0.02	0.0175751	0.401	0.599	0.692308	0.818182
0.02	0.0175751	0.69	0.31	0.818182	1
0.02	0.0175751	0.554	0.446	0.826087	0.826087
0.02	0.0175751	0.713	0.287	1	1
0.02	0.0175751	0.444	0.556	0.826087	1
0.02	0.0175751	0.376	0.624	1	1
0.02	0.019307	0.415	0.585	1	1
0.02	0.019307	0.355	0.645	1	1
0.02	0.019307	0.469	0.531	0.818182	1
0.02	0.019307	0.591	0.409	0.846154	1
0.02	0.019307	0.346	0.654	0.965517	1
0.02	0.019307	0.622	0.378	1	1
0.02	0.019307	0.165	0.835	1	1
0.02	0.019307	0.627	0.373	1	1
0.02	0.019307	0.54	0.46	0.724138	1
0.02	0.019307	0.556	0.444	1	1
0.02	0.019307	0.508	0.492	1	1
0.02	0.019307	0.308	0.692	1	1
0.02	0.019307	0.476	0.524	1	1
0.02	0.019307	0.444	0.556	1	1
0.02	0.019307	0.592	0.408	0.833333	1
0.02	0.019307	0.791	0.209	1	1
0.02	0.019307	0.31	0.69	0.789474	1
0.02	0.019307	0.643	0.357	1	1
0.02	0.019307	0.398	0.602	0.636364	0.809524
0.02	0.019307	0.602	0.398	0.862069	1
0.02	0.019307	0.541	0.459	0.857143	1
0.02	0.019307	0.467	0.533	1	1
0.02	0.019307	0.357	0.643	0.733333	1
0.02	0.019307	0.446	0.554	0.851852	1
0.02	0.019307	0.491	0.509	0.636364	1
0.02	0.019307	0.356	0.644	1	1
0.02	0.019307	0.277	0.723	1	1
0.02	0.019307	0.683	0.317	0.818182	1
0.02	0.019307	0.459	0.541	0.741935	1
0.02	0.019307	0.533	0.467	1	1
0.02	0.019307	0.539	0.461	1	1
0.02	0.019307	0.499	0.501	0.870968	1
0.02	0.019307	0.578	0.422	1	1
0.02	0.019307	0.536	0.464	1	1
0.02	0.019307	0.506	0.494	0.846154	0.846154
0.02	0.019307	0.489	0.511	1	1
0.02	0.019307	0.531	0.469	1	1
0.02	0.019307	0.462	0.538	1	1
0.02	0.019307	0.39	0.61	1	1
0.02	0.019307	0.623	0.377	1	1
0.02	0.019307	0.438	0.562	1	1
0.02	0.019307	0.785	0.215	1	1
0.02	0.019307	0.496	0.504	0.882353	1
0.02	0.019307	0.448	0.552	0.809524	1
0.02	0.019307	0.643	0.357	0.809524	1
0.02	0.019307	0.501	0.499	1	1
0.02	0.019307	0.455	0.545	0.75	0.870968
0.02	0.019307	0.58	0.42	1	1
0.02	0.019307	0.355	0.645	0.8	0.8
0.02	0.019307	0.505	0.495	1	1
0.02	0.019307	0.474	0.526	1	1
0.02	0.019307	0.558	0.442	0.764706	1
0.02	0.019307	0.265	0.735	1	1
0.02	0.019307	0.578	0.422	0.851852	0.851852
0.02	0.019307	0.556	0.444	1	1
0.02	0.019307	0.327	0.673	1	1
0.02	0.019307	0.294	0.706	0.8	0.8
0.02	0.019307	0.395	0.605	0.809524	1
0.02	0.019307	0.36	0.64	1	1
0.02	0.019307	0.414	0.586	0.714286	1
0.02	0.019307	0.543	0.457	1	1
0.02	0.019307	0.363	0.637	0.826087	0.826087
0.02	0.019307	0.56	0.44	0.857143	1
0.02	0.019307	0.231	0.769	0.714286	1
0.02	0.019307	0.558	0.442	1	1
0.02	0.019307	0.546	0.454	1	1
0.02	0.019307	0.676	0.324	1	1
0.02	0.019307	0.626	0.374	0.809524	1
0.02	0.019307	0.546	0.454	0.809524	0.809524
0.02	0.019307	0.341	0.659	1	1
0.02	0.019307	0.5	0.5	0.8	1
0.02	0.019307	0.495	0.505	0.833333	1
0.02	0.019307	0.513	0.487	0.809524	0.809524
0.02	0.019307	0.537	0.463	1	1
0.02	0.019307	0.548	0.452	1	1
0.02	0.019307	0.666	0.334	1	1
0.02	0.019307	0.584	0.416	0.764706	0.764706
0.02	0.019307	0.646	0.354	1	1
0.02	0.019307	0.484	0.516	1	1
0.02	0.019307	0.368	0.632	0.75	1
0.02	0.019307	0.223	0.777	1	1
0.02	0.019307	0.663	0.337	1	0.8
0.02	0.019307	0.568	0.432	1	1
0.02	0.019307	0.401	0.599	0.826087	1
0.02	0.019307	0.568	0.432	0.818182	1
0.02	0.019307	0.408	0.592	0.733333	1
0.02	0.019307	0.321	0.679	1	1
0.02	0.019307	0.663	0.337	0.833333	1
0.02	0.019307	0.487	0.513	0.809524	1
0.02	0.019307	0.471	0.529	1	1
0.02	0.019307	0.353	0.647	1	1
0.02	0.019307	0.552	0.448	1	1
0.02	0.019307	0.441	0.559	1	1
0.02	0.019307	0.467	0.533	1	1
0.02	0.019307	0.44	0.56	1	1
0.02	0.019307	0.518	0.482	0.76	1
0.02	0.019307	0.383	0.617	0.866667	1
0.02	0.019307	0.498	0.502	1	1
0.02	0.019307	0.426	0.574	0.952381	1
0.02	0.019307	0.463	0.537	1	1
0.02	0.0212095	0.635	0.365	1	1
0.02	0.0212095	0.446	0.554	0.806452	1
0.02	0.0212095	0.457	0.543	1	1
0.02	0.0212095	0.384	0.616	1	1
0.02	0.0212095	0.59	0.41	0.607143	0.846154
0.02	0.0212095	0.614	0.386	0.636364	1
0.02	0.0212095	0.561	0.439	0.631579	1
0.02	0.0212095	0.534	0.466	1	1
0.02	0.0212095	0.516	0.484	0.925926	1
0.02	0.0212095	0.289	0.711	0.8	1
0.02	0.0212095	0.583	0.417	0.826087	1
0.02	0.0212095	0.599	0.401	1	1
0.02	0.0212095	0.4	0.6	1	1
0.02	0.0212095	0.513	0.487	1	1
0.02	0.0212095	0.494	0.506	0.733333	1
0.02	0.0212095	0.641	0.359	1	1
0.02	0.0212095	0.585	0.415	1	1
0.02	0.0212095	0.463	0.537	1	1
0.02	0.0212095	0.382	0.618	0.73913	0.73913
0.02	0.0212095	0.503	0.497	1	1
0.02	0.0212095	0.486	0.514	1	1
0.02	0.0212095	0.54	0.46	0.652174	1
0.02	0.0212095	0.62	0.38	1	1
0.02	0.0212095	0.539	0.461	0.826087	1
0.02	0.0212095	0.516	0.484	1	1
0.02	0.0212095	0.39	0.61	1	1
0.02	0.0212095	0.359	0.641	1	1
0.02	0.0212095	0.535	0.465	1	1
0.02	0.0212095	0.567	0.433	1	1
0.02	0.0212095	0.452	0.548	1	0.870968
0.02	0.0212095	0.314	0.686	1	1
0.02	0.0212095	0.479	0.521	1	1
0.02	0.0212095	0.413	0.587	1	1
0.02	0.0212095	0.239	0.761	1	1
0.02	0.0212095	0.34	0.66	1	1
0.02	0.0212095	0.601	0.399	1	1
0.02	0.0212095	0.789	0.211	1	1
0.02	0.0212095	0.742	0.258	0.625	1
0.02	0.0212095	0.253	0.747	1	1
0.02	0.0212095	0.426	0.574	0.809524	1
0.02	0.0212095	0.367	0.633	0.851852	1
0.02	0.0212095	0.481	0.519	1	1
0.02	0.0212095	0.532	0.468	1	1
0.02	0.0212095	0.64	0.36	1	1
0.02	0.0212095	0.494	0.506	0.75	1
0.02	0.0212095	0.504	0.496	1	1
0.02	0.0212095	0.401	0.599	1	1
0.02	0.0212095	0.395	0.605	0.619048	1
0.02	0.0212095	0.53	0.47	0.652174	1
0.02	0.0212095	0.427	0.573	0.84	0.84
0.02	0.0212095	0.477	0.523	1	1
0.02	0.0212095	0.474	0.526	1	1
0.02	0.0212095	0.561	0.439	1	1
0.02	0.0212095	0.499	0.501	0.789474	0.764706
0.02	0.0212095	0.397	0.603	0.666667	1
0.02	0.0212095	0.567	0.433	1	1
0.02	0.0212095	0.652	0.348	0.833333	1
0.02	0.0212095	0.352	0.648	0.677419	0.851852
0.02	0.0212095	0.495	0.505	0.909091	0.666667
0.02	0.0212095	0.437	0.563	0.736842	0.789474
0.02	0.0212095	0.35	0.65	1	1
0.02	0.0212095	0.477	0.523	1	1
0.02	0.0212095	0.421	0.579	0.866667	1
0.02	0.0212095	0.463	0.537	1	1
0.02	0.0212095	0.534	0.466	1	1
0.02	0.0212095	0.493	0.507	0.875	1
0.02	0.0212095	0.523	0.477	0.818182	1
0.02	0.0212095	0.499	0.501	1	1
0.02	0.0212095	0.43	0.57	1	1
0.02	0.0212095	0.566	0.434	1	1
0.02	0.0212095	0.62	0.38	0.703704	1
0.02	0.0212095	0.547	0.453	0.947368	1
0.02	0.0212095	0.651	0.349	1	1
0.02	0.0212095	0.536	0.464	1	1
0.02	0.0212095	0.423	0.577	0.866667	1
0.02	0.0212095	0.466	0.534	0.857143	0.724138
0.02	0.0212095	0.369	0.631	0.8	1
0.02	0.0212095	0.569	0.431	1	1
0.02	0.0212095	0.509	0.491	0.777778	1
0.02	0.0212095	0.586	0.414	1	1
0.02	0.0212095	0.509	0.491	0.818182	1
0.02	0.0212095	0.594	0.406	1	1
0.02	0.0212095	0.507	0.493	1	1
0.02	0.0212095	0.443	0.557	1	1
0.02	0.0212095	0.319	0.681	1	1
0.02	0.0212095	0.682	0.318	1	1
0.02	0.0212095	0.441	0.559	0.84	1
0.02	0.0212095	0.265	0.735	0.615385	1
0.02	0.0212095	0.613	0.387	1	1
0.02	0.0212095	0.716	0.284	0.652174	1
0.02	0.0212095	0.39	0.61	1	1
0.02	0.0212095	0.544	0.456	0.84	1
0.02	0.0212095	0.549	0.451	0.851852	1
0.02	0.0212095	0.404	0.596	1	1
0.02	0.0212095	0.347	0.653	1	1
0.02	0.0212095	0.542	0.458	1	1
0.02	0.0212095	0.482	0.518	0.703704	0.846154
0.02	0.0212095	0.535	0.465	0.612903	0.733333
0.02	0.0212095	0.512	0.488	1	1
0.02	0.0212095	0.424	0.576	1	1
0.02	0.0232995	0.319	0.681	0.851852	1
0.02	0.0232995	0.72	0.28	1	1
0.02	0.0232995	0.52	0.48	1	1
0.02	0.0232995	0.378	0.622	0.826087	1
0.02	0.0232995	0.495	0.505	1	1
0.02	0.0232995	0.555	0.445	0.846154	1
0.02	0.0232995	0.447	0.553	1	1
0.02	0.0232995	0.54	0.46	0.757576	1
0.02	0.0232995	0.637	0.363	0.764706	1
0.02	0.0232995	0.654	0.346	1	1
0.02	0.0232995	0.533	0.467	0.764706	1
0.02	0.0232995	0.419	0.581	0.870968	1
0.02	0.0232995	0.637	0.363	0.777778	0.777778
0.02	0.0232995	0.502	0.498	0.862069	1
0.02	0.0232995	0.663	0.337	0.62963	1
0.02	0.0232995	0.489	0.511	0.8	1
0.02	0.0232995	0.482	0.518	0.826087	1
0.02	0.0232995	0.723	0.277	1	1
0.02	0.0232995	0.474	0.526	0.928571	1
0.02	0.0232995	0.446	0.554	1	1
0.02	0.0232995	0.656	0.344	0.866667	0.8125
0.02	0.0232995	0.453	0.547	0.826087	1
0.02	0.0232995	0.558	0.442	0.933333	1
0.02	0.0232995	0.464	0.536	0.764706	1
0.02	0.0232995	0.605	0.395	1	1
0.02	0.0232995	0.698	0.302	1	1
0.02	0.0232995	0.427	0.573	1	1
0.02	0.0232995	0.361	0.639	1	1
0.02	0.0232995	0.662	0.338	0.852941	1
0.02	0.0232995	0.661	0.339	0.571429	1
0.02	0.0232995	0.524	0.476	1	1
0.02	0.0232995	0.388	0.612	0.612903	1
0.02	0.0232995	0.543	0.457	1	1
0.02	0.0232995	0.5	0.5	0.826087	0.826087
0.02	0.0232995	0.442	0.558	1	1
0.02	0.0232995	0.497	0.503	0.757576	1
0.02	0.0232995	0.574	0.426	0.833333	1
0.02	0.0232995	0.462	0.538	0.565217	1
0.02	0.0232995	0.445	0.555	0.904762	1
0.02	0.0232995	0.399	0.601	0.851852	1
0.02	0.0232995	0.557	0.443	1	1
0.02	0.0232995	0.581	0.419	1	1
0.02	0.0232995	0.484	0.516	0.823529	1
0.02	0.0232995	0.278	0.722	0.818182	1
0.02	0.0232995	0.326	0.674	0.866667	1
0.02	0.0232995	0.427	0.573	0.862069	1
0.02	0.0232995	0.676	0.324	0.818182	1
0.02	0.0232995	0.305	0.695	0.833333	1
0.02	0.0232995	0.678	0.322	1	1
0.02	0.0232995	0.585	0.415	0.818182	1
0.02	0.0232995	0.459	0.541	1	1
0.02	0.0232995	0.772	0.228	1	1
0.02	0.0232995	0.471	0.529	1	1
0.02	0.0232995	0.548	0.452	1	1
0.02	0.0232995	0.505	0.495	0.862069	1
0.02	0.0232995	0.632	0.368	0.517241	0.818182
0.02	0.0232995	0.387	0.613	0.461538	1
0.02	0.0232995	0.633	0.367	1	1
0.02	0.0232995	0.679	0.321	0.826087	1
0.02	0.0232995	0.428	0.572	0.619048	1
0.02	0.0232995	0.469	0.531	1	1
0.02	0.0232995	0.445	0.555	0.857143	1
0.02	0.0232995	0.537	0.463	0.857143	1
0.02	0.0232995	0.58	0.42	1	1
0.02	0.0232995	0.364	0.636	1	1
0.02	0.0232995	0.614	0.386	1	1
0.02	0.0232995	0.501	0.499	0.826087	1
0.02	0.0232995	0.428	0.572	1	1
0.02	0.0232995	0.416	0.584	0.8	1
0.02	0.0232995	0.783	0.217	0.8	1
0.02	0.0232995	0.57	0.43	0.925926	1
0.02	0.0232995	0.682	0.318	0.652174	0.818182
0.02	0.0232995	0.401	0.599	1	1
0.02	0.0232995	0.415	0.585	0.652174	1
0.02	0.0232995	0.556	0.444	0.84	1
0.02	0.0232995	0.483	0.517	0.846154	1
0.02	0.0232995	0.443	0.557	0.846154	1
0.02	0.0232995	0.308	0.692	0.875	1
0.02	0.0232995	0.386	0.614	1	1
0.02	0.0232995	0.413	0.587	1	1
0.02	0.0232995	0.457	0.543	1	1
0.02	0.0232995	0.52	0.48	1	1
0.02	0.0232995	0.611	0.389	1	1
0.02	0.0232995	0.599	0.401	1	1
0.02	0.0232995	0.402	0.598	0.777778	0.777778
0.02	0.0232995	0.526	0.474	0.84	1
0.02	0.0232995	0.395	0.605	1	1
0.02	0.0232995	0.436	0.564	1	1
0.02	0.0232995	0.608	0.392	0.857143	1
0.02	0.0232995	0.464	0.536	1	1
0.02	0.0232995	0.534	0.466	0.789474	1
0.02	0.0232995	0.563	0.437	1	0.809524
0.02	0.0232995	0.66	0.34	0.777778	1
0.02	0.0232995	0.549	0.451	1	1
0.02	0.0232995	0.506	0.494	0.733333	1
0.02	0.0232995	0.634	0.366	1	1
0.02	0.0232995	0.577	0.423	1	1
0.02	0.0232995	0.608	0.392	1	1
0.02	0.0232995	0.39	0.61	0.652174	1
0.02	0.0232995	0.317	0.683	0.789474	0.789474
0.02	0.0255955	0.567	0.433	0.806452	0.806452
0.02	0.0255955	0.56	0.44	1	1
0.02	0.0255955	0.494	0.506	1	1
0.02	0.0255955	0.511	0.489	0.846154	1
0.02	0.0255955	0.521	0.479	0.846154	1
0.02	0.0255955	0.632	0.368	1	1
0.02	0.0255955	0.575	0.425	0.809524	1
0.02	0.0255955	0.382	0.618	1	1
0.02	0.0255955	0.524	0.476	0.925926	1
0.02	0.0255955	0.678	0.322	1	1
0.02	0.0255955	0.586	0.414	0.826087	1
0.02	0.0255955	0.623	0.377	1	1
0.02	0.0255955	0.488	0.512	0.485714	0.757576
0.02	0.0255955	0.469	0.531	1	1
0.02	0.0255955	0.672	0.328	0.862069	1
0.02	0.0255955	0.561	0.439	0.833333	0.833333
0.02	0.0255955	0.612	0.388	1	1
0.02	0.0255955	0.576	0.424	0.75	1
0.02	0.0255955	0.441	0.559	1	1
0.02	0.0255955	0.474	0.526	1	1
0.02	0.0255955	0.517	0.483	1	1
0.02	0.0255955	0.715	0.285	0.793103	1
0.02	0.0255955	0.49	0.51	1	1
0.02	0.0255955	0.659	0.341	1	1
0.02	0.0255955	0.584	0.416	1	1
0.02	0.0255955	0.476	0.524	1	1
0.02	0.0255955	0.432	0.568	1	1
0.02	0.0255955	0.47	0.53	1	1
0.02	0.0255955	0.377	0.623	1	1
0.02	0.0255955	0.45	0.55	0.6	1
0.02	0.0255955	0.681	0.319	0.866667	1
0.02	0.0255955	0.707	0.293	1	1
0.02	0.0255955	0.609	0.391	1	1
0.02	0.0255955	0.358	0.642	0.826087	1
0.02	0.0255955	0.362	0.638	1	1
0.02	0.0255955	0.458	0.542	1	1
0.02	0.0255955	0.517	0.483	1	1
0.02	0.0255955	0.624	0.376	0.68	1
0.02	0.0255955	0.406	0.594	0.714286	1
0.02	0.0255955	0.52	0.48	0.826087	1
0.02	0.0255955	0.409	0.591	1	1
0.02	0.0255955	0.421	0.579	1	1
0.02	0.0255955	0.612	0.388	1	1
0.02	0.0255955	0.228	0.772	1	1
0.02	0.0255955	0.338	0.662	0.92	1
0.02	0.0255955	0.586	0.414	1	1
0.02	0.0255955	0.676	0.324	1	1
0.02	0.0255955	0.532	0.468	0.882353	1
0.02	0.0255955	0.469	0.531	1	1
0.02	0.0255955	0.608	0.392	1	1
0.02	0.0255955	0.687	0.313	0.857143	1
0.02	0.0255955	0.508	0.492	0.826087	1
0.02	0.0255955	0.319	0.681	0.809524	1
0.02	0.0255955	0.673	0.327	0.846154	1
0.02	0.0255955	0.604	0.396	0.862069	0.862069
0.02	0.0255955	0.576	0.424	1	1
0.02	0.0255955	0.448	0.552	1	1
0.02	0.0255955	0.517	0.483	0.833333	1
0.02	0.0255955	0.662	0.338	1	1
0.02	0.0255955	0.774	0.226	1	1
0.02	0.0255955	0.748	0.252	1	1
0.02	0.0255955	0.628	0.372	1	1
0.02	0.0255955	0.657	0.343	1	1
0.02	0.0255955	0.42	0.58	1	1
0.02	0.0255955	0.472	0.528	0.818182	0.818182
0.02	0.0255955	0.426	0.574	1	1
0.02	0.0255955	0.559	0.441	0.724138	1
0.02	0.0255955	0.633	0.367	0.833333	0.833333
0.02	0.0255955	0.564	0.436	1	1
0.02	0.0255955	0.506	0.494	0.714286	1
0.02	0.0255955	0.492	0.508	1	1
0.02	0.0255955	0.486	0.514	1	1
0.02	0.0255955	0.389	0.611	0.862069	1
0.02	0.0255955	0.584	0.416	1	1
0.02	0.0255955	0.57	0.43	1	1
0.02	0.0255955	0.508	0.492	1	1
0.02	0.0255955	0.532	0.468	1	1
0.02	0.0255955	0.509	0.491	0.878788	0.878788
0.02	0.0255955	0.567	0.433	0.666667	0.666667
0.02	0.0255955	0.436	0.564	1	1
0.02	0.0255955	0.578	0.422	1	1
0.02	0.0255955	0.552	0.448	0.84	0.84
0.02	0.0255955	0.456	0.544	1	1
0.02	0.0255955	0.293	0.707	1	1
0.02	0.0255955	0.544	0.456	1	1
0.02	0.0255955	0.617	0.383	1	1
0.02	0.0255955	0.61	0.39	1	1
0.02	0.0255955	0.65	0.35	1	1
0.02	0.0255955	0.535	0.465	0.818182	1
0.02	0.0255955	0.503	0.497	0.862069	0.870968
0.02	0.0255955	0.698	0.302	0.84	0.84
0.02	0.0255955	0.648	0.352	0.851852	1
0.02	0.0255955	0.463	0.537	0.692308	1
0.02	0.0255955	0.649	0.351	0.785714	0.857143
0.02	0.0255955	0.649	0.351	0.866667	1
0.02	0.0255955	0.499	0.501	0.733333	0.851852
0.02	0.0255955	0.542	0.458	0.857143	1
0.02	0.0255955	0.644	0.356	1	1
0.02	0.0255955	0.553	0.447	1	1
0.02	0.0255955	0.383	0.617	1	0.84
0.02	0.0281177	0.529	0.471	0.809524	1
0.02	0.0281177	0.529	0.471	1	1
0.02	0.0281177	0.762	0.238	1	1
0.02	0.0281177	0.664	0.336	0.857143	1
0.02	0.0281177	0.809	0.191	1	1
0.02	0.0281177	0.73	0.27	1	1
0.02	0.0281177	0.366	0.634	0.925926	1
0.02	0.0281177	0.722	0.278	0.833333	1
0.02	0.0281177	0.452	0.548	0.870968	1
0.02	0.0281177	0.63	0.37	0.785714	1
0.02	0.0281177	0.68	0.32	0.689655	1
0.02	0.0281177	0.771	0.229	1	1
0.02	0.0281177	0.683	0.317	0.875	1
0.02	0.0281177	0.555	0.445	0.916667	1
0.02	0.0281177	0.556	0.444	0.733333	1
0.02	0.0281177	0.438	0.562	0.8	1
0.02	0.0281177	0.511	0.489	0.703704	0.846154
0.02	0.0281177	0.469	0.531	1	1
0.02	0.0281177	0.621	0.379	0.857143	1
0.02	0.0281177	0.422	0.578	0.891892	1
0.02	0.0281177	0.625	0.375	1	1
0.02	0.0281177	0.41	0.59	1	1
0.02	0.0281177	0.646	0.354	1	1
0.02	0.0281177	0.539	0.461	0.741935	1
0.02	0.0281177	0.619	0.381	1	1
0.02	0.0281177	0.518	0.482	0.84	1
0.02	0.0281177	0.498	0.502	1	1
0.02	0.0281177	0.531	0.469	0.857143	1
0.02	0.0281177	0.688	0.312	1	0.857143
0.02	0.0281177	0.681	0.319	1	1
0.02	0.0281177	0.684	0.316	1	1
0.02	0.0281177	0.595	0.405	1	1
0.02	0.0281177	0.726	0.274	1	1
0.02	0.0281177	0.569	0.431	0.956522	1
0.02	0.0281177	0.469	0.531	1	1
0.02	0.0281177	0.592	0.408	1	1
0.02	0.0281177	0.547	0.453	0.866667	1
0.02	0.0281177	0.537	0.463	0.833333	1
0.02	0.0281177	0.472	0.528	0.75	0.870968
0.02	0.0281177	0.559	0.441	1	1
0.02	0.0281177	0.522	0.478	1	1
0.02	0.0281177	0.62	0.38	1	1
0.02	0.0281177	0.54	0.46	1	1
0.02	0.0281177	0.657	0.343	0.833333	1
0.02	0.0281177	0.708	0.292	1	1
0.02	0.0281177	0.529	0.471	1	1
0.02	0.0281177	0.516	0.484	1	1
0.02	0.0281177	0.583	0.417	0.8	1
0.02	0.0281177	0.546	0.454	1	1
0.02	0.0281177	0.668	0.332	0.777778	0.777778
0.02	0.0281177	0.643	0.357	0.809524	1
0.02	0.0281177	0.575	0.425	1	1
0.02	0.0281177	0.69	0.31	1	1
0.02	0.0281177	0.651	0.349	0.741935	1
0.02	0.0281177	0.74	0.26	0.833333	1
0.02	0.0281177	0.725	0.275	0.75	1
0.02	0.0281177	0.67	0.33	1	1
0.02	0.0281177	0.591	0.409	0.857143	1
0.02	0.0281177	0.756	0.244	0.75	0.870968
0.02	0.0281177	0.488	0.512	0.68	0.833333
0.02	0.0281177	0.493	0.507	1	1
0.02	0.0281177	0.412	0.588	1	1
0.02	0.0281177	0.652	0.348	0.8	0.8
0.02	0.0281177	0.629	0.371	0.846154	1
0.02	0.0281177	0.601	0.399	1	1
0.02	0.0281177	0.492	0.508	0.84	1
0.02	0.0281177	0.517	0.483	1	1
0.02	0.0281177	0.465	0.535	0.833333	1
0.02	0.0281177	0.673	0.327	0.833333	1
0.02	0.0281177	0.655	0.345	1	1
0.02	0.0281177	0.489	0.511	0.8	1
0.02	0.0281177	0.532	0.468	0.826087	1
0.02	0.0281177	0.465	0.535	0.846154	1
0.02	0.0281177	0.542	0.458	0.666667	0.826087
0.02	0.0281177	0.71	0.29	1	1
0.02	0.0281177	0.583	0.417	0.846154	1
0.02	0.0281177	0.522	0.478	1	1
0.02	0.0281177	0.481	0.519	0.75	1
0.02	0.0281177	0.648	0.352	0.875	1
0.02	0.0281177	0.684	0.316	0.826087	1
0.02	0.0281177	0.627	0.373	0.714286	1
0.02	0.0281177	0.63	0.37	0.870968	0.870968
0.02	0.0281177	0.597	0.403	0.818182	1
0.02	0.0281177	0.582	0.418	0.92	1
0.02	0.0281177	0.857	0.143	0.809524	1
0.02	0.0281177	0.675	0.325	0.833333	1
0.02	0.0281177	0.656	0.344	1	1
0.02	0.0281177	0.56	0.44	1	1
0.02	0.0281177	0.495	0.505	1	1
0.02	0.0281177	0.556	0.444	1	1
0.02	0.0281177	0.456	0.544	1	1
0.02	0.0281177	0.398	0.602	0.851852	0.851852
0.02	0.0281177	0.566	0.434	0.866667	0.866667
0.02	0.0281177	0.594	0.406	0.75	1
0.02	0.0281177	0.621	0.379	1	1
0.02	0.0281177	0.606	0.394	0.757576	0.875
0.02	0.0281177	0.654	0.346	1	1
0.02	0.0281177	0.579	0.421	1	1
0.02	0.0281177	0.657	0.343	0.703704	1
0.02	0.0281177	0.496	0.504	0.703704	1
0.02	0.0308884	0.68	0.32	0.866667	1
0.02	0.0308884	0.525	0.475	0.818182	1
0.02	0.0308884	0.719	0.281	1	1
0.02	0.0308884	0.623	0.377	1	1
0.02	0.0308884	0.521	0.479	0.870968	1
0.02	0.0308884	0.621	0.379	1	1
0.02	0.0308884	0.748	0.252	1	1
0.02	0.0308884	0.689	0.311	1	1
0.02	0.0308884	0.521	0.479	1	1
0.02	0.0308884	0.72	0.28	0.724138	1
0.02	0.0308884	0.8	0.2	1	1
0.02	0.0308884	0.617	0.383	1	1
0.02	0.0308884	0.471	0.529	1	1
0.02	0.0308884	0.514	0.486	1	1
0.02	0.0308884	0.582	0.418	1	1
0.02	0.0308884	0.547	0.453	1	1
0.02	0.0308884	0.698	0.302	0.52	1
0.02	0.0308884	0.54	0.46	0.933333	1
0.02	0.0308884	0.393	0.607	0.8	1
0.02	0.0308884	0.466	0.534	0.885714	1
0.02	0.0308884	0.584	0.416	1	0.882353
0.02	0.0308884	0.479	0.521	0.866667	1
0.02	0.0308884	0.424	0.576	1	1
0.02	0.0308884	0.532	0.468	0.846154	0.846154
0.02	0.0308884	0.491	0.509	0.809524	1
0.02	0.0308884	0.79	0.21	0.857143	1
0.02	0.0308884	0.541	0.459	1	1
0.02	0.0308884	0.614	0.386	0.916667	1
0.02	0.0308884	0.71	0.29	0.846154	1
0.02	0.0308884	0.856	0.144	0.75	0.75
0.02	0.0308884	0.746	0.254	0.92	1
0.02	0.0308884	0.611	0.389	0.68	1
0.02	0.0308884	0.755	0.245	1	1
0.02	0.0308884	0.548	0.452	0.882353	1
0.02	0.0308884	0.57	0.43	0.4375	0.666667
0.02	0.0308884	0.589	0.411	0.555556	0.851852
0.02	0.0308884	0.708	0.292	0.724138	1
0.02	0.0308884	0.614	0.386	1	1
0.02	0.0308884	0.477	0.523	0.818182	0.818182
0.02	0.0308884	0.511	0.489	0.885714	1
0.02	0.0308884	0.517	0.483	1	1
0.02	0.0308884	0.697	0.303	0.8	1
0.02	0.0308884	0.559	0.441	1	1
0.02	0.0308884	0.664	0.336	0.703704	1
0.02	0.0308884	0.608	0.392	1	1
0.02	0.0308884	0.6	0.4	1	1
0.02	0.0308884	0.709	0.291	1	1
0.02	0.0308884	0.509	0.491	0.846154	1
0.02	0.0308884	0.612	0.388	0.714286	1
0.02	0.0308884	0.718	0.282	1	1
0.02	0.0308884	0.653	0.347	1	1
0.02	0.0308884	0.379	0.621	0.894737	1
0.02	0.0308884	0.667	0.333	0.789474	1
0.02	0.0308884	0.695	0.305	1	1
0.02	0.0308884	0.688	0.312	0.454545	1
0.02	0.0308884	0.646	0.354	1	1
0.02	0.0308884	0.619	0.381	1	1
0.02	0.0308884	0.561	0.439	0.870968	1
0.02	0.0308884	0.838	0.162	0.8	1
0.02	0.0308884	0.586	0.414	1	0.862069
0.02	0.0308884	0.654	0.346	1	1
0.02	0.0308884	0.585	0.415	0.733333	1
0.02	0.0308884	0.548	0.452	0.862069	0.862069
0.02	0.0308884	0.543	0.457	1	1
0.02	0.0308884	0.569	0.431	0.846154	1
0.02	0.0308884	0.606	0.394	1	1
0.02	0.0308884	0.69	0.31	1	1
0.02	0.0308884	0.479	0.521	0.84	1
0.02	0.0308884	0.753	0.247	1	1
0.02	0.0308884	0.746	0.254	0.866667	1
0.02	0.0308884	0.47	0.53	1	1
0.02	0.0308884	0.631	0.369	0.866667	0.866667
0.02	0.0308884	0.786	0.214	1	1
0.02	0.0308884	0.761	0.239	0.818182	1
0.02	0.0308884	0.568	0.432	0.666667	1
0.02	0.0308884	0.616	0.384	1	1
0.02	0.0308884	0.733	0.267	0.846154	1
0.02	0.0308884	0.568	0.432	0.878788	1
0.02	0.0308884	0.451	0.549	0.870968	1
0.02	0.0308884	0.683	0.317	0.882353	1
0.02	0.0308884	0.437	0.563	0.684211	0.882353
0.02	0.0308884	0.433	0.567	1	1
0.02	0.0308884	0.688	0.312	0.714286	1
0.02	0.0308884	0.731	0.269	0.928571	1
0.02	0.0308884	0.568	0.432	0.846154	1
0.02	0.0308884	0.407	0.593	1	1
0.02	0.0308884	0.6	0.4	1	1
0.02	0.0308884	0.605	0.395	1	1
0.02	0.0308884	0.763	0.237	1	1
0.02	0.0308884	0.643	0.357	0.724138	0.857143
0.02	0.0308884	0.626	0.374	0.809524	1
0.02	0.0308884	0.498	0.502	0.586207	1
0.02	0.0308884	0.64	0.36	0.846154	1
0.02	0.0308884	0.768	0.232	0.636364	1
0.02	0.0308884	0.391	0.609	0.826087	1
0.02	0.0308884	0.49	0.51	0.870968	1
0.02	0.0308884	0.591	0.409	0.833333	0.888889
0.02	0.0308884	0.701	0.299	0.647059	1
0.02	0.0308884	0.566	0.434	0.470588	0.933333
0.02	0.0308884	0.623	0.377	0.666667	1
0.02	0.0339322	0.656	0.344	1	1
0.02	0.0339322	0.618	0.382	0.846154	1
0.02	0.0339322	0.525	0.475	0.647059	0.741935
0.02	0.0339322	0.692	0.308	0.857143	0.846154
0.02	0.0339322	0.852	0.148	0.578947	1
0.02	0.0339322	0.48	0.52	1	1
0.02	0.0339322	0.374	0.626	1	0.862069
0.02	0.0339322	0.623	0.377	0.6	1
0.02	0.0339322	0.667	0.333	1	1
0.02	0.0339322	0.74	0.26	0.870968	1
0.02	0.0339322	0.745	0.255	0.783784	1
0.02	0.0339322	0.628	0.372	0.862069	0.851852
0.02	0.0339322	0.577	0.423	0.833333	1
0.02	0.0339322	0.718	0.282	1	1
0.02	0.0339322	0.458	0.542	0.806452	1
0.02	0.0339322	0.619	0.381	0.764706	1
0.02	0.0339322	0.723	0.277	1	1
0.02	0.0339322	0.664	0.336	0.722222	1
0.02	0.0339322	0.568	0.432	1	1
0.02	0.0339322	0.751	0.249	1	1
0.02	0.0339322	0.66	0.34	1	1
0.02	0.0339322	0.625	0.375	0.826087	1
0.02	0.0339322	0.642	0.358	0.771429	1
0.02	0.0339322	0.588	0.412	1	1
0.02	0.0339322	0.873	0.127	1	1
0.02	0.0339322	0.766	0.234	1	1
0.02	0.0339322	0.731	0.269	1	1
0.02	0.0339322	0.601	0.399	0.882353	1
0.02	0.0339322	0.528	0.472	0.826087	1
0.02	0.0339322	0.665	0.335	0.851852	1
0.02	0.0339322	0.647	0.353	0.870968	1
0.02	0.0339322	0.77	0.23	0.789474	1
0.02	0.0339322	0.667	0.333	0.741935	1
0.02	0.0339322	0.816	0.184	1	1
0.02	0.0339322	0.534	0.466	0.878788	1
0.02	0.0339322	0.586	0.414	0.875	0.875
0.02	0.0339322	0.646	0.354	0.8	1
0.02	0.0339322	0.716	0.284	0.724138	1
0.02	0.0339322	0.792	0.208	0.857143	1
0.02	0.0339322	0.584	0.416	0.866667	1
0.02	0.0339322	0.654	0.346	0.733333	0.862069
0.02	0.0339322	0.663	0.337	1	1
0.02	0.0339322	0.67	0.33	0.7	0.8
0.02	0.0339322	0.604	0.396	0.625	0.741935
0.02	0.0339322	0.625	0.375	0.875	1
0.02	0.0339322	0.682	0.318	1	1
0.02	0.0339322	0.574	0.426	1	1
0.02	0.0339322	0.697	0.303	0.846154	1
0.02	0.0339322	0.739	0.261	0.692308	1
0.02	0.0339322	0.681	0.319	0.769231	1
0.02	0.0339322	0.725	0.275	1	0.857143
0.02	0.0339322	0.514	0.486	0.875	1
0.02	0.0339322	0.665	0.335	0.478261	1
0.02	0.0339322	0.544	0.456	0.875	1
0.02	0.0339322	0.566	0.434	0.818182	0.818182
0.02	0.0339322	0.769	0.231	0.5	1
0.02	0.0339322	0.586	0.414	0.875	1
0.02	0.0339322	0.524	0.476	1	1
0.02	0.0339322	0.656	0.344	1	1
0.02	0.0339322	0.539	0.461	0.962963	1
0.02	0.0339322	0.536	0.464	1	1
0.02	0.0339322	0.636	0.364	0.862069	0.862069
0.02	0.0339322	0.514	0.486	1	1
0.02	0.0339322	0.636	0.364	0.806452	1
0.02	0.0339322	0.658	0.342	1	1
0.02	0.0339322	0.563	0.437	0.733333	0.733333
0.02	0.0339322	0.522	0.478	0.846154	0.846154
0.02	0.0339322	0.565	0.435	0.612903	1
0.02	0.0339322	0.679	0.321	0.652174	1
0.02	0.0339322	0.519	0.481	1	0.888889
0.02	0.0339322	0.665	0.335	0.636364	1
0.02	0.0339322	0.752	0.248	0.741935	1
0.02	0.0339322	0.596	0.404	1	1
0.02	0.0339322	0.63	0.37	0.866667	1
0.02	0.0339322	0.647	0.353	0.818182	1
0.02	0.0339322	0.643	0.357	0.548387	0.862069
0.02	0.0339322	0.692	0.308	1	1
0.02	0.0339322	0.87	0.13	0.55	1
0.02	0.0339322	0.752	0.248	1	1
0.02	0.0339322	0.656	0.344	0.833333	1
0.02	0.0339322	0.781	0.219	0.666667	0.862069
0.02	0.0339322	0.787	0.213	0.846154	0.846154
0.02	0.0339322	0.762	0.238	0.692308	0.84
0.02	0.0339322	0.558	0.442	0.703704	1
0.02	0.0339322	0.711	0.289	0.84	1
0.02	0.0339322	0.755	0.245	0.8	1
0.02	0.0339322	0.598	0.402	0.875	1
0.02	0.0339322	0.636	0.364	0.826087	1
0.02	0.0339322	0.568	0.432	1	1
0.02	0.0339322	0.542	0.458	1	1
0.02	0.0339322	0.627	0.373	1	1
0.02	0.0339322	0.376	0.624	1	1
0.02	0.0339322	0.564	0.436	0.84	1
0.02	0.0339322	0.502	0.498	1	1
0.02	0.0339322	0.783	0.217	1	1
0.02	0.0339322	0.65	0.35	0.807692	1
0.02	0.0339322	0.597	0.403	0.857143	1
0.02	0.0339322	0.591	0.409	0.878788	1
0.02	0.0339322	0.467	0.533	0.714286	1
0.02	0.0339322	0.603	0.397	1	1
0.02	0.0372759	0.602	0.398	0.875	1
0.02	0.0372759	0.603	0.397	0.846154	0.846154
0.02	0.0372759	0.58	0.42	0.846154	0.846154
0.02	0.0372759	0.718	0.282	0.846154	1
0.02	0.0372759	0.708	0.292	0.818182	1
0.02	0.0372759	0.726	0.274	0.666667	1
0.02	0.0372759	0.674	0.326	1	1
0.02	0.0372759	0.589	0.411	1	1
0.02	0.0372759	0.545	0.455	1	1
0.02	0.0372759	0.668	0.332	0.891892	1
0.02	0.0372759	0.569	0.431	0.741935	0.857143
0.02	0.0372759	0.587	0.413	0.75	1
0.02	0.0372759	0.559	0.441	0.730769	0.84
0.02	0.0372759	0.69	0.31	1	1
0.02	0.0372759	0.755	0.245	0.724138	1
0.02	0.0372759	0.749	0.251	0.757576	1
0.02	0.0372759	0.485	0.515	1	1
0.02	0.0372759	0.583	0.417	1	1
0.02	0.0372759	0.791	0.209	1	1
0.02	0.0372759	0.638	0.362	1	1
0.02	0.0372759	0.59	0.41	1	1
0.02	0.0372759	0.695	0.305	1	1
0.02	0.0372759	0.522	0.478	0.714286	1
0.02	0.0372759	0.766	0.234	0.75	0.862069
0.02	0.0372759	0.7	0.3	0.833333	1
0.02	0.0372759	0.781	0.219	0.529412	0.862069
0.02	0.0372759	0.63	0.37	1	1
0.02	0.0372759	0.67	0.33	1	1
0.02	0.0372759	0.702	0.298	0.72093	0.902439
0.02	0.0372759	0.686	0.314	1	1
0.02	0.0372759	0.676	0.324	0.470588	0.741935
0.02	0.0372759	0.768	0.232	0.851852	1
0.02	0.0372759	0.705	0.295	1	1
0.02	0.0372759	0.691	0.309	1	1
0.02	0.0372759	0.75	0.25	1	1
0.02	0.0372759	0.638	0.362	0.789474	1
0.02	0.0372759	0.611	0.389	0.878788	0.878788
0.02	0.0372759	0.653	0.347	0.866667	1
0.02	0.0372759	0.663	0.337	1	1
0.02	0.0372759	0.599	0.401	0.870968	1
0.02	0.0372759	0.723	0.277	1	1
0.02	0.0372759	0.733	0.267	1	1
0.02	0.0372759	0.646	0.354	1	1
0.02	0.0372759	0.569	0.431	0.647059	1
0.02	0.0372759	0.568	0.432	0.84	1
0.02	0.0372759	0.663	0.337	1	1
0.02	0.0372759	0.68	0.32	1	1
0.02	0.0372759	0.773	0.227	0.809524	1
0.02	0.0372759	0.666	0.334	1	1
0.02	0.0372759	0.579	0.421	0.866667	1
0.02	0.0372759	0.577	0.423	1	1
0.02	0.0372759	0.727	0.273	1	1
0.02	0.0372759	0.699	0.301	1	1
0.02	0.0372759	0.78	0.22	0.692308	1
0.02	0.0372759	0.717	0.283	1	1
0.02	0.0372759	0.688	0.312	0.692308	1
0.02	0.0372759	0.42	0.58	0.88	1
0.02	0.0372759	0.729	0.271	1	1
0.02	0.0372759	0.5	0.5	1	1
0.02	0.0372759	0.798	0.202	0.818182	1
0.02	0.0372759	0.638	0.362	0.833333	0.833333
0.02	0.0372759	0.492	0.508	0.833333	1
0.02	0.0372759	0.671	0.329	0.586207	0.84
0.02	0.0372759	0.618	0.382	1	1
0.02	0.0372759	0.652	0.348	0.833333	1
0.02	0.0372759	0.678	0.322	1	1
0.02	0.0372759	0.854	0.146	1	1
0.02	0.0372759	0.668	0.332	0.894737	1
0.02	0.0372759	0.67	0.33	0.857143	1
0.02	0.0372759	0.607	0.393	0.818182	1
0.02	0.0372759	0.575	0.425	1	1
0.02	0.0372759	0.769	0.231	0.84	1
0.02	0.0372759	0.772	0.228	0.615385	1
0.02	0.0372759	0.557	0.443	1	1
0.02	0.0372759	0.72	0.28	0.818182	1
0.02	0.0372759	0.704	0.296	0.735294	0.878788
0.02	0.0372759	0.404	0.596	0.84	1
0.02	0.0372759	0.697	0.303	0.851852	1
0.02	0.0372759	0.721	0.279	1	1
0.02	0.0372759	0.663	0.337	1	1
0.02	0.0372759	0.721	0.279	0.789474	1
0.02	0.0372759	0.62	0.38	1	1
0.02	0.0372759	0.652	0.348	0.862069	1
0.02	0.0372759	0.553	0.447	0.96875	1
0.02	0.0372759	0.696	0.304	0.666667	1
0.02	0.0372759	0.626	0.374	0.757576	0.870968
0.02	0.0372759	0.581	0.419	0.75	0.870968
0.02	0.0372759	0.785	0.215	0.846154	1
0.02	0.0372759	0.763	0.237	0.809524	1
0.02	0.0372759	0.776	0.224	1	1
0.02	0.0372759	0.565	0.435	1	1
0.02	0.0372759	0.751	0.249	0.84	0.84
0.02	0.0372759	0.806	0.194	1	1
0.02	0.0372759	0.745	0.255	1	1
0.02	0.0372759	0.652	0.348	0.857143	1
0.02	0.0372759	0.527	0.473	0.692308	1
0.02	0.0372759	0.69	0.31	1	1
0.02	0.0372759	0.634	0.366	0.75	1
0.02	0.0372759	0.619	0.381	0.68	1
0.02	0.0372759	0.668	0.332	1	1
0.02	0.0409492	0.649	0.351	1	1
0.02	0.0409492	0.716	0.284	0.724138	1
0.02	0.0409492	0.753	0.247	0.846154	1
0.02	0.0409492	0.8	0.2	0.857143	1
0.02	0.0409492	0.709	0.291	1	1
0.02	0.0409492	0.725	0.275	0.866667	1
0.02	0.0409492	0.752	0.248	0.888889	1
0.02	0.0409492	0.759	0.241	1	1
0.02	0.0409492	0.554	0.446	1	1
0.02	0.0409492	0.781	0.219	0.8	1
0.02	0.0409492	0.752	0.248	0.846154	0.846154
0.02	0.0409492	0.556	0.444	1	1
0.02	0.0409492	0.682	0.318	1	1
0.02	0.0409492	0.708	0.292	1	1
0.02	0.0409492	0.568	0.432	1	1
0.02	0.0409492	0.665	0.335	0.724138	1
0.02	0.0409492	0.74	0.26	0.6	1
0.02	0.0409492	0.724	0.276	1	1
0.02	0.0409492	0.675	0.325	0.857143	1
0.02	0.0409492	0.664	0.336	1	1
0.02	0.0409492	0.508	0.492	1	1
0.02	0.0409492	0.644	0.356	0.72093	1
0.02	0.0409492	0.674	0.326	1	1
0.02	0.0409492	0.538	0.462	1	1
0.02	0.0409492	0.567	0.433	0.878788	1
0.02	0.0409492	0.779	0.221	0.625	1
0.02	0.0409492	0.699	0.301	0.68	0.833333
0.02	0.0409492	0.743	0.257	1	1
0.02	0.0409492	0.769	0.231	0.833333	0.833333
0.02	0.0409492	0.581	0.419	0.933333	1
0.02	0.0409492	0.472	0.528	0.714286	1
0.02	0.0409492	0.722	0.278	0.826087	1
0.02	0.0409492	0.696	0.304	0.785714	1
0.02	0.0409492	0.55	0.45	0.813953	0.904762
0.02	0.0409492	0.607	0.393	0.742857	1
0.02	0.0409492	0.61	0.39	1	1
0.02	0.0409492	0.66	0.34	0.666667	1
0.02	0.0409492	0.633	0.367	0.741935	1
0.02	0.0409492	0.599	0.401	1	0.857143
0.02	0.0409492	0.507	0.493	1	1
0.02	0.0409492	0.614	0.386	1	1
0.02	0.0409492	0.751	0.249	1	1
0.02	0.0409492	0.666	0.334	0.714286	1
0.02	0.0409492	0.763	0.237	1	1
0.02	0.0409492	0.63	0.37	0.9	1
0.02	0.0409492	0.532	0.468	0.757576	0.875
0.02	0.0409492	0.459	0.541	1	1
0.02	0.0409492	0.604	0.396	0.866667	0.866667
0.02	0.0409492	0.579	0.421	0.75	1
0.02	0.0409492	0.763	0.237	0.846154	0.846154
0.02	0.0409492	0.615	0.385	0.657143	1
0.02	0.0409492	0.684	0.316	0.851852	1
0.02	0.0409492	0.553	0.447	0.783784	1
0.02	0.0409492	0.712	0.288	1	1
0.02	0.0409492	0.549	0.451	1	1
0.02	0.0409492	0.54	0.46	1	1
0.02	0.0409492	0.668	0.332	0.675676	1
0.02	0.0409492	0.721	0.279	0.833333	1
0.02	0.0409492	0.791	0.209	0.777778	1
0.02	0.0409492	0.613	0.387	0.909091	1
0.02	0.0409492	0.749	0.251	0.862069	1
0.02	0.0409492	0.642	0.358	1	1
0.02	0.0409492	0.805	0.195	1	1
0.02	0.0409492	0.683	0.317	0.84	0.84
0.02	0.0409492	0.682	0.318	0.862069	1
0.02	0.0409492	0.715	0.285	0.615385	1
0.02	0.0409492	0.565	0.435	0.878788	1
0.02	0.0409492	0.641	0.359	0.619048	0.8
0.02	0.0409492	0.76	0.24	0.851852	0.851852
0.02	0.0409492	0.777	0.223	0.8	0.862069
0.02	0.0409492	0.785	0.215	0.783784	0.882353
0.02	0.0409492	0.671	0.329	0.866667	1
0.02	0.0409492	0.726	0.274	1	1
0.02	0.0409492	0.629	0.371	0.542857	1
0.02	0.0409492	0.668	0.332	1	1
0.02	0.0409492	0.501	0.499	0.882353	1
0.02	0.0409492	0.732	0.268	0.740741	1
0.02	0.0409492	0.682	0.318	1	1
0.02	0.0409492	0.647	0.353	0.818182	0.818182
0.02	0.0409492	0.696	0.304	1	1
0.02	0.0409492	0.499	0.501	0.5	0.84
0.02	0.0409492	0.701	0.299	0.84	0.84
0.02	0.0409492	0.573	0.427	1	1
0.02	0.0409492	0.786	0.214	0.75	1
0.02	0.0409492	0.681	0.319	0.733333	0.862069
0.02	0.0409492	0.686	0.314	0.5625	1
0.02	0.0409492	0.718	0.282	0.866667	1
0.02	0.0409492	0.6	0.4	0.777778	1
0.02	0.0409492	0.756	0.244	1	1
0.02	0.0409492	0.728	0.272	1	1
0.02	0.0409492	0.711	0.289	1	1
0.02	0.0409492	0.436	0.564	0.783784	0.888889
0.02	0.0409492	0.583	0.417	0.870968	1
0.02	0.0409492	0.727	0.273	0.69697	0.757576
0.02	0.0409492	0.572	0.428	0.885714	1
0.02	0.0409492	0.613	0.387	0.777778	1
0.02	0.0409492	0.749	0.251	1	1
0.02	0.0409492	0.789	0.211	1	1
0.02	0.0409492	0.821	0.179	1	1
0.02	0.0409492	0.813	0.187	1	1
0.02	0.0449843	0.501	0.499	0.866667	1
0.02	0.0449843	0.767	0.233	0.846154	1
0.02	0.0449843	0.668	0.332	0.891892	1
0.02	0.0449843	0.727	0.273	1	1
0.02	0.0449843	0.7	0.3	1	1
0.02	0.0449843	0.727	0.273	0.882353	0.882353
0.02	0.0449843	0.855	0.145	0.818182	0.9
0.02	0.0449843	0.818	0.182	0.970588	1
0.02	0.0449843	0.727	0.273	1	1
0.02	0.0449843	0.579	0.421	1	1
0.02	0.0449843	0.781	0.219	0.724138	1
0.02	0.0449843	0.793	0.207	1	1
0.02	0.0449843	0.741	0.259	1	1
0.02	0.0449843	0.675	0.325	0.857143	1
0.02	0.0449843	0.817	0.183	1	1
0.02	0.0449843	0.772	0.228	0.888889	1
0.02	0.0449843	0.7	0.3	1	1
0.02	0.0449843	0.763	0.237	0.757576	0.866667
0.02	0.0449843	0.74	0.26	1	1
0.02	0.0449843	0.506	0.494	0.789474	1
0.02	0.0449843	0.812	0.188	0.862069	1
0.02	0.0449843	0.528	0.472	0.85	1
0.02	0.0449843	0.615	0.385	0.862069	1
0.02	0.0449843	0.597	0.403	0.894737	0.894737
0.02	0.0449843	0.587	0.413	0.733333	1
0.02	0.0449843	0.573	0.427	0.755102	1
0.02	0.0449843	0.7	0.3	1	1
0.02	0.0449843	0.617	0.383	0.75	1
0.02	0.0449843	0.721	0.279	1	1
0.02	0.0449843	0.742	0.258	1	0.885714
0.02	0.0449843	0.681	0.319	0.862069	1
0.02	0.0449843	0.651	0.349	0.8125	1
0.02	0.0449843	0.771	0.229	1	1
0.02	0.0449843	0.716	0.284	0.882353	1
0.02	0.0449843	0.658	0.342	0.675676	1
0.02	0.0449843	0.563	0.437	0.69697	1
0.02	0.0449843	0.688	0.312	1	1
0.02	0.0449843	0.755	0.245	0.741935	1
0.02	0.0449843	0.6	0.4	0.722222	1
0.02	0.0449843	0.62	0.38	0.857143	1
0.02	0.0449843	0.62	0.38	0.888889	1
0.02	0.0449843	0.729	0.271	1	1
0.02	0.0449843	0.752	0.248	1	1
0.02	0.0449843	0.765	0.235	0.818182	1
0.02	0.0449843	0.838	0.162	0.818182	1
0.02	0.0449843	0.643	0.357	0.902439	1
0.02	0.0449843	0.847	0.153	0.666667	0.833333
0.02	0.0449843	0.685	0.315	1	1
0.02	0.0449843	0.574	0.426	1	1
0.02	0.0449843	0.761	0.239	0.741935	0.857143
0.02	0.0449843	0.689	0.311	1	1
0.02	0.0449843	0.652	0.348	0.724138	0.857143
0.02	0.0449843	0.71	0.29	1	1
0.02	0.0449843	0.8	0.2	0.705882	0.878788
0.02	0.0449843	0.538	0.462	0.875	1
0.02	0.0449843	0.625	0.375	1	1
0.02	0.0449843	0.916	0.084	0.677419	1
0.02	0.0449843	0.795	0.205	0.862069	1
0.02	0.0449843	0.679	0.321	0.794872	1
0.02	0.0449843	0.71	0.29	1	1
0.02	0.0449843	0.8	0.2	0.9	1
0.02	0.0449843	0.827	0.173	0.657143	1
0.02	0.0449843	0.709	0.291	0.75	1
0.02	0.0449843	0.646	0.354	0.846154	1
0.02	0.0449843	0.719	0.281	0.84	1
0.02	0.0449843	0.779	0.221	1	1
0.02	0.0449843	0.708	0.292	0.851852	1
0.02	0.0449843	0.642	0.358	0.897436	0.897436
0.02	0.0449843	0.484	0.516	1	1
0.02	0.0449843	0.696	0.304	1	1
0.02	0.0449843	0.728	0.272	1	1
0.02	0.0449843	0.831	0.169	1	1
0.02	0.0449843	0.619	0.381	0.923077	1
0.02	0.0449843	0.662	0.338	0.6	1
0.02	0.0449843	0.605	0.395	0.777778	1
0.02	0.0449843	0.646	0.354	1	1
0.02	0.0449843	0.74	0.26	0.631579	0.783784
0.02	0.0449843	0.634	0.366	1	1
0.02	0.0449843	0.898	0.102	0.517241	0.84
0.02	0.0449843	0.787	0.213	1	1
0.02	0.0449843	0.678	0.322	1	1
0.02	0.0449843	0.715	0.285	1	1
0.02	0.0449843	0.751	0.249	0.575758	0.857143
0.02	0.0449843	0.687	0.313	0.666667	0.857143
0.02	0.0449843	0.679	0.321	1	1
0.02	0.0449843	0.717	0.283	1	1
0.02	0.0449843	0.659	0.341	1	1
0.02	0.0449843	0.628	0.372	1	1
0.02	0.0449843	0.763	0.237	0.652174	1
0.02	0.0449843	0.684	0.316	0.84	0.84
0.02	0.0449843	0.697	0.303	0.933333	0.875
0.02	0.0449843	0.496	0.504	0.961538	1
0.02	0.0449843	0.682	0.318	0.833333	1
0.02	0.0449843	0.56	0.44	0.862069	1
0.02	0.0449843	0.607	0.393	0.882353	1
0.02	0.0449843	0.699	0.301	0.851852	0.851852
0.02	0.0449843	0.588	0.412	1	1
0.02	0.0449843	0.775	0.225	1	1
0.02	0.0449843	0.655	0.345	0.846154	1
0.02	0.0449843	0.635	0.365	1	1
0.02	0.0494171	0.664	0.336	0.882353	1
0.02	0.0494171	0.745	0.255	1	1
0.02	0.0494171	0.628	0.372	0.913043	1
0.02	0.0494171	0.876	0.124	0.461538	0.818182
0.02	0.0494171	0.661	0.339	0.741935	1
0.02	0.0494171	0.748	0.252	0.736842	0.789474
0.02	0.0494171	0.782	0.218	0.8	1
0.02	0.0494171	0.604	0.396	0.891892	1
0.02	0.0494171	0.691	0.309	0.764706	1
0.02	0.0494171	0.724	0.276	1	1
0.02	0.0494171	0.753	0.247	0.636364	0.862069
0.02	0.0494171	0.772	0.228	0.84	1
0.02	0.0494171	0.869	0.131	0.619048	1
0.02	0.0494171	0.798	0.202	1	1
0.02	0.0494171	0.584	0.416	0.902439	1
0.02	0.0494171	0.655	0.345	0.538462	0.84
0.02	0.0494171	0.764	0.236	0.741935	1
0.02	0.0494171	0.657	0.343	1	1
0.02	0.0494171	0.561	0.439	0.675676	1
0.02	0.0494171	0.805	0.195	1	1
0.02	0.0494171	0.76	0.24	0.657143	1
0.02	0.0494171	0.821	0.179	0.862069	1
0.02	0.0494171	0.572	0.428	0.857143	1
0.02	0.0494171	0.736	0.264	0.846154	1
0.02	0.0494171	0.709	0.291	0.695652	0.822222
0.02	0.0494171	0.775	0.225	0.862069	1
0.02	0.0494171	0.63	0.37	0.916667	1
0.02	0.0494171	0.766	0.234	0.846154	0.846154
0.02	0.0494171	0.593	0.407	1	1
0.02	0.0494171	0.744	0.256	0.783784	1
0.02	0.0494171	0.597	0.403	0.68	0.846154
0.02	0.0494171	0.79	0.21	0.7	1
0.02	0.0494171	0.737	0.263	0.84	0.84
0.02	0.0494171	0.568	0.432	0.866667	1
0.02	0.0494171	0.789	0.211	1	1
0.02	0.0494171	0.802	0.198	0.769231	1
0.02	0.0494171	0.609	0.391	0.878788	1
0.02	0.0494171	0.67	0.33	1	1
0.02	0.0494171	0.756	0.244	0.833333	1
0.02	0.0494171	0.649	0.351	0.969697	1
0.02	0.0494171	0.651	0.349	0.771429	1
0.02	0.0494171	0.583	0.417	1	1
0.02	0.0494171	0.711	0.289	0.795918	1
0.02	0.0494171	0.694	0.306	0.888889	1
0.02	0.0494171	0.664	0.336	0.882353	0.882353
0.02	0.0494171	0.722	0.278	1	1
0.02	0.0494171	0.72	0.28	1	1
0.02	0.0494171	0.667	0.333	0.7	1
0.02	0.0494171	0.705	0.295	0.818182	1
0.02	0.0494171	0.684	0.316	0.846154	1
0.02	0.0494171	0.696	0.304	1	1
0.02	0.0494171	0.838	0.162	0.8	1
0.02	0.0494171	0.744	0.256	0.666667	0.882353
0.02	0.0494171	0.845	0.155	0.909091	1
0.02	0.0494171	0.622	0.378	0.894737	0.894737
0.02	0.0494171	0.656	0.344	0.846154	1
0.02	0.0494171	0.735	0.265	0.813953	1
0.02	0.0494171	0.723	0.277	0.714286	0.897436
0.02	0.0494171	0.784	0.216	0.857143	1
0.02	0.0494171	0.757	0.243	0.533333	0.857143
0.02	0.0494171	0.696	0.304	0.866667	1
0.02	0.0494171	0.739	0.261	0.875	1
0.02	0.0494171	0.731	0.269	1	1
0.02	0.0494171	0.813	0.187	0.818182	0.818182
0.02	0.0494171	0.639	0.361	0.851852	1
0.02	0.0494171	0.682	0.318	0.794872	1
0.02	0.0494171	0.699	0.301	1	1
0.02	0.0494171	0.719	0.281	1	1
0.02	0.0494171	0.617	0.383	0.885714	1
0.02	0.0494171	0.732	0.268	1	1
0.02	0.0494171	0.701	0.299	0.657143	1
0.02	0.0494171	0.608	0.392	0.870968	1
0.02	0.0494171	0.711	0.289	0.891892	1
0.02	0.0494171	0.689	0.311	0.8125	1
0.02	0.0494171	0.785	0.215	1	1
0.02	0.0494171	0.605	0.395	0.789474	0.891892
0.02	0.0494171	0.639	0.361	0.848485	1
0.02	0.0494171	0.791	0.209	0.571429	1
0.02	0.0494171	0.75	0.25	0.8	1
0.02	0.0494171	0.759	0.241	0.655172	1
0.02	0.0494171	0.653	0.347	1	0.902439
0.02	0.0494171	0.776	0.224	1	1
0.02	0.0494171	0.61	0.39	0.894737	1
0.02	0.0494171	0.715	0.285	1	1
0.02	0.0494171	0.716	0.284	1	1
0.02	0.0494171	0.579	0.421	0.487805	1
0.02	0.0494171	0.692	0.308	0.878788	1
0.02	0.0494171	0.629	0.371	1	1
0.02	0.0494171	0.678	0.322	0.882353	1
0.02	0.0494171	0.643	0.357	0.826087	0.826087
0.02	0.0494171	0.675	0.325	0.885714	1
0.02	0.0494171	0.754	0.246	0.76	1
0.02	0.0494171	0.622	0.378	0.9	1
0.02	0.0494171	0.645	0.355	1	1
0.02	0.0494171	0.615	0.385	1	1
0.02	0.0494171	0.7	0.3	0.685714	0.771429
0.02	0.0494171	0.736	0.264	0.891892	1
0.02	0.0494171	0.728	0.272	0.84	1
0.02	0.0494171	0.669	0.331	0.833333	1
0.02	0.0494171	0.674	0.326	0.875	0.875
0.02	0.0542868	0.731	0.269	1	1
0.02	0.0542868	0.773	0.227	0.761905	1
0.02	0.0542868	0.672	0.328	0.882353	1
0.02	0.0542868	0.589	0.411	0.619048	0.8
0.02	0.0542868	0.874	0.126	0.68	1
0.02	0.0542868	0.715	0.285	0.6	1
0.02	0.0542868	0.683	0.317	0.644444	1
0.02	0.0542868	0.862	0.138	0.875	1
0.02	0.0542868	0.699	0.301	1	1
0.02	0.0542868	0.666	0.334	0.826087	0.826087
0.02	0.0542868	0.775	0.225	0.947368	1
0.02	0.0542868	0.777	0.223	1	1
0.02	0.0542868	0.794	0.206	0.631579	0.888889
0.02	0.0542868	0.776	0.224	0.878788	0.885714
0.02	0.0542868	0.672	0.328	0.862069	1
0.02	0.0542868	0.805	0.195	0.75	1
0.02	0.0542868	0.683	0.317	0.644444	0.727273
0.02	0.0542868	0.679	0.321	0.818182	1
0.02	0.0542868	0.87	0.13	0.851852	0.851852
0.02	0.0542868	0.72	0.28	1	1
0.02	0.0542868	0.74	0.26	0.771429	1
0.02	0.0542868	0.679	0.321	0.722222	1
0.02	0.0542868	0.731	0.269	1	0.857143
0.02	0.0542868	0.667	0.333	0.897436	1
0.02	0.0542868	0.767	0.233	0.692308	1
0.02	0.0542868	0.693	0.307	1	1
0.02	0.0542868	0.687	0.313	0.891892	1
0.02	0.0542868	0.713	0.287	0.84	1
0.02	0.0542868	0.797	0.203	0.888889	0.888889
0.02	0.0542868	0.846	0.154	0.757576	1
0.02	0.0542868	0.659	0.341	0.882353	1
0.02	0.0542868	0.536	0.464	1	1
0.02	0.0542868	0.607	0.393	0.657143	0.764706
0.02	0.0542868	0.783	0.217	1	1
0.02	0.0542868	0.81	0.19	0.862069	1
0.02	0.0542868	0.701	0.299	0.741935	0.866667
0.02	0.0542868	0.796	0.204	1	1
0.02	0.0542868	0.779	0.221	0.885714	1
0.02	0.0542868	0.671	0.329	0.578947	0.888889
0.02	0.0542868	0.722	0.278	0.885714	1
0.02	0.0542868	0.725	0.275	0.931034	1
0.02	0.0542868	0.7	0.3	0.851852	1
0.02	0.0542868	0.667	0.333	0.7	0.794872
0.02	0.0542868	0.699	0.301	0.9	1
0.02	0.0542868	0.711	0.289	0.809524	1
0.02	0.0542868	0.754	0.246	0.741935	0.857143
0.02	0.0542868	0.785	0.215	0.888889	0.894737
0.02	0.0542868	0.784	0.216	1	0.866667
0.02	0.0542868	0.652	0.348	0.870968	1
0.02	0.0542868	0.691	0.309	0.567568	1
0.02	0.0542868	0.756	0.244	0.857143	1
0.02	0.0542868	0.715	0.285	0.777778	1
0.02	0.0542868	0.643	0.357	0.829787	1
0.02	0.0542868	0.641	0.359	0.783784	1
0.02	0.0542868	0.817	0.183	0.666667	1
0.02	0.0542868	0.808	0.192	0.714286	0.882353
0.02	0.0542868	0.653	0.347	0.849057	1
0.02	0.0542868	0.737	0.263	0.882353	1
0.02	0.0542868	0.693	0.307	0.764706	1
0.02	0.0542868	0.857	0.143	0.733333	1
0.02	0.0542868	0.763	0.237	0.878788	1
0.02	0.0542868	0.53	0.47	0.916667	1
0.02	0.0542868	0.724	0.276	0.741935	1
0.02	0.0542868	0.845	0.155	0.68	1
0.02	0.0542868	0.745	0.255	0.851852	1
0.02	0.0542868	0.834	0.166	1	1
0.02	0.0542868	0.858	0.142	0.636364	1
0.02	0.0542868	0.733	0.267	0.851852	1
0.02	0.0542868	0.741	0.259	0.891892	1
0.02	0.0542868	0.695	0.305	0.459459	0.878788
0.02	0.0542868	0.692	0.308	1	1
0.02	0.0542868	0.88	0.12	0.733333	1
0.02	0.0542868	0.752	0.248	0.7	0.894737
0.02	0.0542868	0.661	0.339	1	1
0.02	0.0542868	0.726	0.274	0.875	1
0.02	0.0542868	0.721	0.279	0.878788	1
0.02	0.0542868	0.874	0.126	1	1
0.02	0.0542868	0.736	0.264	0.6875	0.866667
0.02	0.0542868	0.723	0.277	0.862069	1
0.02	0.0542868	0.735	0.265	0.666667	0.882353
0.02	0.0542868	0.731	0.269	0.857143	0.857143
0.02	0.0542868	0.781	0.219	0.941176	1
0.02	0.0542868	0.746	0.254	0.870968	1
0.02	0.0542868	0.711	0.289	1	1
0.02	0.0542868	0.737	0.263	1	1
0.02	0.0542868	0.772	0.228	0.666667	1
0.02	0.0542868	0.666	0.334	0.823529	1
0.02	0.0542868	0.722	0.278	0.882353	1
0.02	0.0542868	0.795	0.205	0.862069	0.862069
0.02	0.0542868	0.811	0.189	0.666667	1
0.02	0.0542868	0.726	0.274	0.894737	1
0.02	0.0542868	0.71	0.29	0.757576	1
0.02	0.0542868	0.769	0.231	0.655172	1
0.02	0.0542868	0.742	0.258	1	1
0.02	0.0542868	0.699	0.301	0.904762	1
0.02	0.0542868	0.809	0.191	0.652174	1
0.02	0.0542868	0.648	0.352	0.757576	0.875
0.02	0.0542868	0.632	0.368	0.75	1
0.02	0.0542868	0.789	0.211	0.846154	0.846154
0.02	0.0542868	0.736	0.264	0.888889	1
0.02	0.0596362	0.763	0.237	1	1
0.02	0.0596362	0.799	0.201	0.818182	1
0.02	0.0596362	0.707	0.293	0.783784	0.888889
0.02	0.0596362	0.835	0.165	0.68	1
0.02	0.0596362	0.734	0.266	0.769231	0.846154
0.02	0.0596362	0.775	0.225	1	1
0.02	0.0596362	0.72	0.28	0.741935	1
0.02	0.0596362	0.775	0.225	0.758621	1
0.02	0.0596362	0.73	0.27	1	1
0.02	0.0596362	0.664	0.336	1	1
0.02	0.0596362	0.704	0.296	0.783784	0.888889
0.02	0.0596362	0.824	0.176	0.870968	0.870968
0.02	0.0596362	0.797	0.203	0.724138	1
0.02	0.0596362	0.823	0.177	0.7	1
0.02	0.0596362	0.66	0.34	0.818182	1
0.02	0.0596362	0.572	0.428	0.794872	0.894737
0.02	0.0596362	0.775	0.225	0.888889	1
0.02	0.0596362	0.7	0.3	0.882353	1
0.02	0.0596362	0.643	0.357	1	1
0.02	0.0596362	0.797	0.203	0.724138	0.857143
0.02	0.0596362	0.74	0.26	0.878788	1
0.02	0.0596362	0.693	0.307	0.55	1
0.02	0.0596362	0.731	0.269	1	1
0.02	0.0596362	0.732	0.268	0.904762	1
0.02	0.0596362	0.722	0.278	1	0.882353
0.02	0.0596362	0.724	0.276	0.870968	1
0.02	0.0596362	0.595	0.405	0.804878	0.894737
0.02	0.0596362	0.66	0.34	0.809524	1
0.02	0.0596362	0.654	0.346	0.757576	1
0.02	0.0596362	0.745	0.255	0.9	1
0.02	0.0596362	0.798	0.202	0.866667	1
0.02	0.0596362	0.776	0.224	0.741935	0.733333
0.02	0.0596362	0.799	0.201	0.684211	0.885714
0.02	0.0596362	0.626	0.374	0.8	1
0.02	0.0596362	0.759	0.241	0.69697	1
0.02	0.0596362	0.719	0.281	0.657143	1
0.02	0.0596362	0.695	0.305	0.888889	1
0.02	0.0596362	0.693	0.307	0.875	1
0.02	0.0596362	0.642	0.358	1	1
0.02	0.0596362	0.756	0.244	0.826087	1
0.02	0.0596362	0.708	0.292	0.678571	1
0.02	0.0596362	0.783	0.217	0.741935	1
0.02	0.0596362	0.664	0.336	0.777778	1
0.02	0.0596362	0.763	0.237	1	1
0.02	0.0596362	0.751	0.249	1	1
0.02	0.0596362	0.61	0.39	1	1
0.02	0.0596362	0.759	0.241	0.878788	1
0.02	0.0596362	0.756	0.244	0.741935	1
0.02	0.0596362	0.749	0.251	0.692308	1
0.02	0.0596362	0.7	0.3	0.911111	1
0.02	0.0596362	0.825	0.175	0.857143	1
0.02	0.0596362	0.655	0.345	0.85	1
0.02	0.0596362	0.725	0.275	0.806452	0.878788
0.02	0.0596362	0.661	0.339	1	1
0.02	0.0596362	0.809	0.191	1	1
0.02	0.0596362	0.739	0.261	0.567568	1
0.02	0.0596362	0.746	0.254	1	1
0.02	0.0596362	0.701	0.299	0.803922	0.918367
0.02	0.0596362	0.614	0.386	1	1
0.02	0.0596362	0.795	0.205	0.5	1
0.02	0.0596362	0.806	0.194	0.821429	1
0.02	0.0596362	0.614	0.386	1	1
0.02	0.0596362	0.872	0.128	0.714286	1
0.02	0.0596362	0.806	0.194	0.714286	1
0.02	0.0596362	0.695	0.305	1	1
0.02	0.0596362	0.751	0.249	0.833333	1
0.02	0.0596362	0.804	0.196	0.714286	1
0.02	0.0596362	0.643	0.357	0.771429	1
0.02	0.0596362	0.869	0.131	1	1
0.02	0.0596362	0.748	0.252	1	1
0.02	0.0596362	0.747	0.253	0.741935	1
0.02	0.0596362	0.644	0.356	0.804878	1
0.02	0.0596362	0.704	0.296	0.888889	0.888889
0.02	0.0596362	0.733	0.267	1	1
0.02	0.0596362	0.694	0.306	0.789474	1
0.02	0.0596362	0.662	0.338	0.789474	1
0.02	0.0596362	0.805	0.195	1	1
0.02	0.0596362	0.804	0.196	0.68	1
0.02	0.0596362	0.785	0.215	1	1
0.02	0.0596362	0.821	0.179	0.857143	1
0.02	0.0596362	0.854	0.146	0.885714	1
0.02	0.0596362	0.699	0.301	0.733333	0.9
0.02	0.0596362	0.787	0.213	0.823529	1
0.02	0.0596362	0.706	0.294	0.875	1
0.02	0.0596362	0.742	0.258	1	1
0.02	0.0596362	0.75	0.25	0.875	1
0.02	0.0596362	0.862	0.138	0.588235	0.875
0.02	0.0596362	0.706	0.294	1	1
0.02	0.0596362	0.745	0.255	0.756098	1
0.02	0.0596362	0.646	0.354	0.846154	1
0.02	0.0596362	0.762	0.238	0.822222	1
0.02	0.0596362	0.589	0.411	0.888889	1
0.02	0.0596362	0.71	0.29	0.789474	0.891892
0.02	0.0596362	0.811	0.189	1	1
0.02	0.0596362	0.844	0.156	0.870968	1
0.02	0.0596362	0.829	0.171	0.84375	1
0.02	0.0596362	0.724	0.276	0.928571	1
0.02	0.0596362	0.795	0.205	1	1
[truncated: 3,002 more rows]
