# Supplementary material for: Top-down machine learning approach for high-throughput single-molecule analysis
Source: eLife journal article supplement (doi:10.7554/elife.53357), 2020-04-08
Supplement: supp [file elife-53357-supp-v1.zip › elife_poa_e53357_Figure_3_source_data_1.xlsx]

## Sheet: Figure 3-State Occupancy
	Occupancy Per Simulated State
# Binding Sites	U	B1	B2	B3	B4
1	0.66 ± 0.09	0.34 ± 0.09
2	0.44 ± 0.08	0.45 ± 0.07	0.12 ± 0.05
3	0.29 ± 0.08	0.44 ± 0.06	0.23 ± 0.06	0.04 ± 0.03
4	0.19 ± 0.06	0.39 ± 0.06	0.30 ± 0.06	0.11 ± 0.04	0.01 ± 0.01
Fractional occupancy of each liganded state across CNBD simulations with varying number of binding sites (mean ± s.d.).
These dynamics were used in Figure 3a, 3b, and Figure 3-figure supplement 3

## Sheet: Figure 3a
		DISC						STaSI						vbFRET
Number of States	Signal to Noise	Accuracy		Precision		Recall		Accuracy		Precision		Recall		Accuracy		Precision		Recall
		mean	s.d.	mean	s.d.	mean	s.d.	mean	s.d.	mean	s.d.	mean	s.d.	mean	s.d.	mean	s.d.	mean	s.d.
2	1	0	0	0	0	0	0	0.0184349	0.0184349	0.0795769	0.0795769	0.0232562	0.0232562	0.0499644	0.0499644	0.159861	0.159861	0.0670999	0.0670999
2	2	0.343125	0.343125	0.597289	0.597289	0.433312	0.433312	0.201708	0.201708	0.45104	0.45104	0.261295	0.261295	0.359963	0.359963	0.613002	0.613002	0.456924	0.456924
2	3	0.661508	0.661508	0.853716	0.853716	0.738261	0.738261	0.406553	0.406553	0.672006	0.672006	0.494389	0.494389	0.680443	0.680443	0.855104	0.855104	0.761551	0.761551
2	4	0.861195	0.861195	0.950808	0.950808	0.897364	0.897364	0.564135	0.564135	0.760287	0.760287	0.675501	0.675501	0.857209	0.857209	0.93506	0.93506	0.909243	0.909243
2	5	0.959179	0.959179	0.986895	0.986895	0.970187	0.970187	0.641024	0.641024	0.752078	0.752078	0.800624	0.800624	0.930913	0.930913	0.951966	0.951966	0.973873	0.973873
2	6	0.984757	0.984757	0.994705	0.994705	0.989398	0.989398	0.641089	0.641089	0.723604	0.723604	0.836072	0.836072	0.873238	0.873238	0.882727	0.882727	0.984462	0.984462
2	7	0.990928	0.990928	0.993478	0.993478	0.997327	0.997327	0.58988	0.58988	0.647759	0.647759	0.865298	0.865298	0.839678	0.839678	0.844055	0.844055	0.98696	0.98696
2	8	0.9992	0.9992	0.999787	0.999787	0.999388	0.999388	0.585301	0.585301	0.629392	0.629392	0.888116	0.888116	0.76731	0.76731	0.770823	0.770823	0.984426	0.984426
2	9	1	1	1	1	1	1	0.561285	0.561285	0.584812	0.584812	0.920933	0.920933	0.658979	0.658979	0.662321	0.662321	0.973814	0.973814
2	10	0.993906	0.993906	0.993906	0.993906	1	1	0.564568	0.564568	0.585924	0.585924	0.93136	0.93136	0.65713	0.65713	0.661475	0.661475	0.983257	0.983257
3	1	0	0	0	0	0	0	0.00780967	0.00780967	0.0375273	0.0375273	0.00974212	0.00974212	0.0301308	0.0301308	0.101362	0.101362	0.0408018	0.0408018
3	2	0.0762603	0.0762603	0.181012	0.181012	0.104358	0.104358	0.118602	0.118602	0.297121	0.297121	0.159296	0.159296	0.323802	0.323802	0.576148	0.576148	0.421441	0.421441
3	3	0.637586	0.637586	0.843717	0.843717	0.718874	0.718874	0.345253	0.345253	0.603841	0.603841	0.435792	0.435792	0.658349	0.658349	0.847534	0.847534	0.74294	0.74294
3	4	0.850414	0.850414	0.946072	0.946072	0.89161	0.89161	0.533786	0.533786	0.746945	0.746945	0.639745	0.639745	0.82865	0.82865	0.907546	0.907546	0.899918	0.899918
3	5	0.941223	0.941223	0.981282	0.981282	0.957604	0.957604	0.638045	0.638045	0.792613	0.792613	0.753481	0.753481	0.891497	0.891497	0.922629	0.922629	0.959647	0.959647
3	6	0.980723	0.980723	0.993996	0.993996	0.986252	0.986252	0.596784	0.596784	0.679473	0.679473	0.805113	0.805113	0.844341	0.844341	0.852853	0.852853	0.979429	0.979429
3	7	0.995429	0.995429	0.998667	0.998667	0.99669	0.99669	0.534311	0.534311	0.583519	0.583519	0.849902	0.849902	0.788072	0.788072	0.791865	0.791865	0.989395	0.989395
3	8	0.997119	0.997119	0.998742	0.998742	0.998327	0.998327	0.490456	0.490456	0.522189	0.522189	0.878917	0.878917	0.690941	0.690941	0.696109	0.696109	0.978579	0.978579
3	9	0.993203	0.993203	0.993947	0.993947	0.999233	0.999233	0.45989	0.45989	0.480244	0.480244	0.900549	0.900549	0.630495	0.630495	0.635064	0.635064	0.981683	0.981683
3	10	0.995757	0.995757	0.996103	0.996103	0.999638	0.999638	0.405324	0.405324	0.41871	0.41871	0.926697	0.926697	0.577672	0.577672	0.582503	0.582503	0.981772	0.981772
4	1	0	0	0	0	0	0	0.00528801	0.00528801	0.0269406	0.0269406	0.00648575	0.00648575	0.0208851	0.0208851	0.077542	0.077542	0.0276391	0.0276391
4	2	0.0586926	0.0586926	0.13443	0.13443	0.0788107	0.0788107	0.0919158	0.0919158	0.251433	0.251433	0.12318	0.12318	0.281714	0.281714	0.530282	0.530282	0.372541	0.372541
4	3	0.552468	0.552468	0.776548	0.776548	0.646397	0.646397	0.27161	0.27161	0.524585	0.524585	0.348064	0.348064	0.611408	0.611408	0.808208	0.808208	0.711312	0.711312
4	4	0.810336	0.810336	0.925023	0.925023	0.863295	0.863295	0.480166	0.480166	0.717025	0.717025	0.580037	0.580037	0.834802	0.834802	0.929918	0.929918	0.889402	0.889402
3	5	0.917961	0.917961	0.970152	0.970152	0.94188	0.94188	0.568272	0.568272	0.740306	0.740306	0.693687	0.693687	0.893554	0.893554	0.929113	0.929113	0.954878	0.954878
4	6	0.968307	0.968307	0.986025	0.986025	0.981137	0.981137	0.535965	0.535965	0.628618	0.628618	0.759399	0.759399	0.864017	0.864017	0.877317	0.877317	0.97571	0.97571
4	7	0.983441	0.983441	0.989465	0.989465	0.993304	0.993304	0.509484	0.509484	0.565642	0.565642	0.819089	0.819089	0.857355	0.857355	0.862085	0.862085	0.989899	0.989899
4	8	0.987048	0.987048	0.989657	0.989657	0.997155	0.997155	0.409016	0.409016	0.437739	0.437739	0.838572	0.838572	0.728198	0.728198	0.732097	0.732097	0.983281	0.983281
4	9	0.988632	0.988632	0.991286	0.991286	0.996735	0.996735	0.325186	0.325186	0.341388	0.341388	0.863335	0.863335	0.677843	0.677843	0.681466	0.681466	0.980702	0.980702
4	10	0.983382	0.983382	0.985454	0.985454	0.996955	0.996955	0.337727	0.337727	0.347702	0.347702	0.900771	0.900771	0.615213	0.615213	0.617772	0.617772	0.98405	0.98405
5	1	0	0	0	0	0	0	0.00285317	0.00285317	0.0161932	0.0161932	0.00343375	0.00343375	0.0112891	0.0112891	0.0435256	0.0435256	0.0149176	0.0149176
5	2	0.016317	0.016317	0.0444996	0.0444996	0.0219182	0.0219182	0.0501042	0.0501042	0.149588	0.149588	0.06828	0.06828	0.259868	0.259868	0.493442	0.493442	0.349	0.349
5	3	0.520205	0.520205	0.748958	0.748958	0.613396	0.613396	0.208435	0.208435	0.42225	0.42225	0.278691	0.278691	0.59172	0.59172	0.788217	0.788217	0.699769	0.699769
5	4	0.795242	0.795242	0.917329	0.917329	0.854577	0.854577	0.413622	0.413622	0.649911	0.649911	0.520602	0.520602	0.793965	0.793965	0.894176	0.894176	0.873915	0.873915
5	5	0.904855	0.904855	0.959954	0.959954	0.93911	0.93911	0.507685	0.507685	0.691817	0.691817	0.641906	0.641906	0.848288	0.848288	0.89083	0.89083	0.938905	0.938905
5	6	0.961092	0.961092	0.981959	0.981959	0.977725	0.977725	0.53629	0.53629	0.645149	0.645149	0.739184	0.739184	0.848452	0.848452	0.869498	0.869498	0.96923	0.96923
5	7	0.968555	0.968555	0.978233	0.978233	0.989131	0.989131	0.424531	0.424531	0.47768	0.47768	0.762204	0.762204	0.80048	0.80048	0.812887	0.812887	0.976287	0.976287
5	8	0.984899	0.984899	0.990862	0.990862	0.993519	0.993519	0.286863	0.286863	0.307399	0.307399	0.786509	0.786509	0.741713	0.741713	0.749568	0.749568	0.981334	0.981334
5	9	0.984679	0.984679	0.989233	0.989233	0.994945	0.994945	0.293007	0.293007	0.306689	0.306689	0.846991	0.846991	0.709671	0.709671	0.718147	0.718147	0.976237	0.976237
5	10	0.984251	0.984251	0.987056	0.987056	0.996912	0.996912	0.262186	0.262186	0.270475	0.270475	0.882365	0.882365	0.680389	0.680389	0.687929	0.687929	0.98075	0.98075

## Sheet: Figure 3b
Frame	Time (s)	Simulation	True Fit	DISC	STaSI	vbFRET
1	0.1	90.0842	72.122	71.9942	72.6228	72.122		plotted data
2	0.2	57.3699	72.122	71.9942	72.6228	72.122
3	0.3	93.5827	72.122	71.9942	72.6228	72.122
4	0.4	60.0846	72.122	71.9942	72.6228	72.122
5	0.5	195.913	213.887	213.859	205.199	204.233
6	0.6	200.666	213.887	213.859	205.199	204.233
7	0.7	124.461	142.135	142.047	130.248	133.617
8	0.8	140.102	142.135	142.047	130.248	133.617
9	0.9	124.412	142.135	142.047	130.248	133.617
10	1	127.495	142.135	142.047	130.248	133.617
11	1.1	151.853	142.135	142.047	130.248	133.617
12	1.2	134.708	142.135	142.047	130.248	133.617
13	1.3	117.757	142.135	142.047	130.248	133.617
14	1.4	132.177	142.135	142.047	130.248	133.617
15	1.5	123.126	142.135	142.047	130.248	133.617
16	1.6	145.9	142.135	142.047	130.248	133.617
17	1.7	130.746	142.135	142.047	130.248	133.617
18	1.8	129.096	142.135	142.047	130.248	133.617
19	1.9	128.42	142.135	142.047	130.248	133.617
20	2	121.843	142.135	142.047	130.248	133.617
21	2.1	127.598	142.135	142.047	130.248	133.617
22	2.2	138.837	142.135	142.047	130.248	133.617
23	2.3	77.7199	72.122	71.9942	72.6228	72.122
24	2.4	88.6046	72.122	71.9942	72.6228	72.122
25	2.5	71.0795	72.122	71.9942	72.6228	72.122
26	2.6	75.7802	72.122	71.9942	72.6228	72.122
27	2.7	116.096	72.122	71.9942	72.6228	72.122
28	2.8	76.0461	72.122	71.9942	72.6228	72.122
29	2.9	77.0676	72.122	71.9942	72.6228	72.122
30	3	80.419	72.122	71.9942	72.6228	72.122
31	3.1	79.1747	72.122	71.9942	72.6228	72.122
32	3.2	88.249	72.122	71.9942	72.6228	72.122
33	3.3	85.5596	72.122	71.9942	72.6228	72.122
34	3.4	66.7119	72.122	71.9942	72.6228	72.122
35	3.5	65.1196	72.122	71.9942	72.6228	72.122
36	3.6	77.073	72.122	71.9942	72.6228	72.122
37	3.7	56.4329	72.122	71.9942	72.6228	72.122
38	3.8	81.8263	72.122	71.9942	72.6228	72.122
39	3.9	140.796	142.135	142.047	141.076	146.082
40	4	163.852	142.135	142.047	141.076	146.082
41	4.1	148.532	142.135	142.047	141.076	146.082
42	4.2	140.311	142.135	142.047	141.076	146.082
43	4.3	145.758	142.135	142.047	141.076	146.082
44	4.4	130.054	142.135	142.047	141.076	133.617
45	4.5	140.194	142.135	142.047	141.076	133.617
46	4.6	126.527	142.135	142.047	141.076	133.617
47	4.7	196.253	213.887	213.859	205.199	204.233
48	4.8	191.09	213.887	213.859	205.199	204.233
49	4.9	214.884	213.887	213.859	229.628	204.233
50	5	261.768	282.195	281.735	229.628	282.195
51	5.1	268.208	282.195	281.735	229.628	282.195
52	5.2	204.53	213.887	213.859	205.199	204.233
53	5.3	204.74	213.887	213.859	205.199	204.233
54	5.4	214.568	213.887	213.859	205.199	204.233
55	5.5	206.397	213.887	213.859	205.199	204.233
56	5.6	275.32	282.195	281.735	229.628	282.195
57	5.7	282.218	282.195	281.735	229.628	282.195
58	5.8	221.404	213.887	213.859	229.628	217.222
59	5.9	220.149	213.887	213.859	229.628	217.222
60	6	226.165	213.887	213.859	229.628	217.222
61	6.1	220.373	213.887	213.859	229.628	217.222
62	6.2	225.966	213.887	213.859	229.628	217.222
63	6.3	245.349	213.887	213.859	229.628	217.222
64	6.4	218.84	213.887	213.859	229.628	217.222
65	6.5	201.353	213.887	213.859	229.628	217.222
66	6.6	203.806	213.887	213.859	229.628	217.222
67	6.7	218.31	213.887	213.859	229.628	217.222
68	6.8	212.55	213.887	213.859	229.628	217.222
69	6.9	215.866	213.887	213.859	229.628	217.222
70	7	241.128	213.887	213.859	229.628	217.222
71	7.1	211.673	213.887	213.859	229.628	217.222
72	7.2	217.565	213.887	213.859	229.628	217.222
73	7.3	219.074	213.887	213.859	229.628	217.222
74	7.4	288.682	282.195	281.735	282.751	282.195
75	7.5	280.176	282.195	281.735	282.751	282.195
76	7.6	287.693	282.195	281.735	282.751	282.195
77	7.7	312.907	282.195	281.735	282.751	282.195
78	7.8	297.25	282.195	281.735	282.751	282.195
79	7.9	282.919	282.195	281.735	282.751	282.195
80	8	262.579	282.195	281.735	282.751	282.195
81	8.1	265.213	282.195	281.735	282.751	282.195
82	8.2	286.273	282.195	281.735	282.751	282.195
83	8.3	279.485	282.195	281.735	282.751	282.195
84	8.4	292.096	282.195	281.735	282.751	282.195
85	8.5	276.86	282.195	281.735	282.751	282.195
86	8.6	287.376	282.195	281.735	282.751	282.195
87	8.7	282.23	282.195	281.735	282.751	282.195
88	8.8	295.791	282.195	281.735	282.751	282.195
89	8.9	229.333	213.887	281.735	229.628	217.222
90	9	270.601	282.195	281.735	229.628	282.195
91	9.1	257.913	282.195	281.735	229.628	282.195
92	9.2	289.585	282.195	281.735	282.751	282.195
93	9.3	287.848	282.195	281.735	282.751	282.195
94	9.4	294.953	282.195	281.735	282.751	282.195
95	9.5	287.009	282.195	281.735	282.751	282.195
96	9.6	202.959	213.887	213.859	216.398	217.222
97	9.7	214.019	213.887	213.859	216.398	217.222
98	9.8	204.367	213.887	213.859	216.398	217.222
99	9.9	224.411	213.887	213.859	216.398	217.222
100	10	223.168	213.887	213.859	216.398	217.222
101	10.1	291.207	282.195	281.735	282.751	282.195
102	10.2	305.84	282.195	281.735	282.751	282.195
103	10.3	279.871	282.195	281.735	282.751	282.195
104	10.4	288.362	282.195	281.735	282.751	282.195
105	10.5	272.212	282.195	281.735	282.751	282.195
106	10.6	286.58	282.195	281.735	282.751	282.195
107	10.7	296.887	282.195	281.735	282.751	282.195
108	10.8	298.778	282.195	281.735	282.751	282.195
109	10.9	288.989	282.195	281.735	282.751	282.195
110	11	222.106	213.887	213.859	216.398	217.222
111	11.1	215.377	213.887	213.859	216.398	217.222
112	11.2	215.764	213.887	213.859	216.398	217.222
113	11.3	210.581	213.887	213.859	216.398	217.222
114	11.4	217.115	213.887	213.859	216.398	217.222
115	11.5	228.051	213.887	213.859	216.398	217.222
116	11.6	206.171	213.887	213.859	216.398	217.222
117	11.7	233.483	213.887	213.859	216.398	217.222
118	11.8	223.759	213.887	213.859	216.398	217.222
119	11.9	216.67	213.887	213.859	216.398	217.222
120	12	206.989	213.887	213.859	216.398	217.222
121	12.1	242.808	213.887	213.859	216.398	217.222
122	12.2	223.408	213.887	213.859	216.398	217.222
123	12.3	201.596	213.887	213.859	216.398	217.222
124	12.4	210.352	213.887	213.859	216.398	217.222
125	12.5	217.159	213.887	213.859	216.398	217.222
126	12.6	152.599	142.135	142.047	141.076	146.082
127	12.7	136.199	142.135	142.047	141.076	146.082
128	12.8	158.511	142.135	142.047	141.076	146.082
129	12.9	126.487	142.135	142.047	141.076	146.082
130	13	141.966	142.135	142.047	141.076	146.082
131	13.1	139.214	142.135	142.047	141.076	146.082
132	13.2	156.105	142.135	142.047	141.076	146.082
133	13.3	141.393	142.135	142.047	141.076	146.082
134	13.4	121.221	142.135	142.047	141.076	146.082
135	13.5	133.16	142.135	142.047	141.076	146.082
136	13.6	212.534	213.887	213.859	216.398	217.222
137	13.7	217.381	213.887	213.859	216.398	217.222
138	13.8	205.606	213.887	213.859	216.398	217.222
139	13.9	221.238	213.887	213.859	216.398	217.222
140	14	219.731	213.887	213.859	216.398	217.222
141	14.1	214.135	213.887	213.859	216.398	217.222
142	14.2	215.268	213.887	213.859	216.398	217.222
143	14.3	223.459	213.887	213.859	216.398	217.222
144	14.4	235.334	213.887	213.859	216.398	217.222
145	14.5	231.134	213.887	213.859	216.398	217.222
146	14.6	217.222	213.887	213.859	216.398	217.222
147	14.7	212.751	213.887	213.859	216.398	217.222
148	14.8	184.308	213.887	213.859	216.398	217.222
149	14.9	227.957	213.887	213.859	216.398	217.222
150	15	226.529	213.887	213.859	216.398	217.222
151	15.1	133.803	142.135	142.047	141.076	146.082
152	15.2	118.716	142.135	142.047	141.076	146.082
153	15.3	143.09	142.135	142.047	141.076	146.082
154	15.4	146.269	142.135	142.047	141.076	146.082
155	15.5	144.767	142.135	142.047	141.076	146.082
156	15.6	146.91	142.135	142.047	141.076	146.082
157	15.7	138.789	142.135	142.047	141.076	146.082
158	15.8	151.213	142.135	142.047	141.076	146.082
159	15.9	153.431	142.135	142.047	141.076	146.082
160	16	140.61	142.135	142.047	141.076	146.082
161	16.1	118.002	142.135	142.047	141.076	146.082
162	16.2	211.468	213.887	213.859	216.398	217.222
163	16.3	232.769	213.887	213.859	216.398	217.222
164	16.4	205.969	213.887	213.859	216.398	217.222
165	16.5	201.705	213.887	213.859	216.398	217.222
166	16.6	160.141	142.135	142.047	152.311	146.082
167	16.7	140.801	142.135	142.047	141.076	146.082
168	16.8	153.578	142.135	142.047	141.076	146.082
169	16.9	128.1	142.135	142.047	141.076	133.617
170	17	116.202	142.135	142.047	141.076	133.617
171	17.1	117.634	142.135	142.047	141.076	133.617
172	17.2	150.209	142.135	142.047	141.076	133.617
173	17.3	137.597	142.135	142.047	141.076	133.617
174	17.4	142.181	142.135	142.047	141.076	133.617
175	17.5	135.776	142.135	142.047	141.076	133.617
176	17.6	149.947	142.135	142.047	141.076	133.617
177	17.7	157.681	142.135	142.047	141.076	133.617
178	17.8	126.392	142.135	142.047	141.076	133.617
179	17.9	141.575	142.135	142.047	141.076	133.617
180	18	146.568	142.135	142.047	141.076	133.617
181	18.1	121.387	142.135	142.047	141.076	133.617
182	18.2	156.911	142.135	142.047	141.076	133.617
183	18.3	145.425	142.135	142.047	141.076	133.617
184	18.4	143.25	142.135	142.047	141.076	133.617
185	18.5	139.552	142.135	142.047	141.076	133.617
186	18.6	147.735	142.135	142.047	141.076	133.617
187	18.7	118.381	142.135	142.047	141.076	133.617
188	18.8	136.454	142.135	142.047	141.076	133.617
189	18.9	116.704	142.135	142.047	141.076	133.617
190	19	132.725	142.135	142.047	141.076	133.617
191	19.1	120.831	142.135	142.047	141.076	133.617
192	19.2	133.434	142.135	142.047	141.076	133.617
193	19.3	147.051	142.135	142.047	141.076	133.617
194	19.4	132.364	142.135	142.047	141.076	133.617
195	19.5	133.411	142.135	142.047	141.076	133.617
196	19.6	154.044	142.135	142.047	141.076	146.082
197	19.7	137.462	142.135	142.047	141.076	146.082
198	19.8	158.963	142.135	142.047	141.076	146.082
199	19.9	143.932	142.135	142.047	141.076	146.082
200	20	164.204	142.135	142.047	141.076	146.082
201	20.1	135.549	142.135	142.047	141.076	146.082
202	20.2	133.484	142.135	142.047	141.076	146.082
203	20.3	121.162	142.135	142.047	141.076	146.082
204	20.4	157.016	142.135	142.047	141.076	146.082
205	20.5	65.3724	72.122	71.9942	72.6228	72.122
206	20.6	72.5879	72.122	71.9942	72.6228	72.122
207	20.7	71.2616	72.122	71.9942	72.6228	72.122
208	20.8	77.5705	72.122	71.9942	72.6228	72.122
209	20.9	72.0295	72.122	71.9942	72.6228	72.122
210	21	52.0655	72.122	71.9942	72.6228	72.122
211	21.1	144.746	142.135	142.047	72.6228	146.082
212	21.2	74.2301	72.122	71.9942	72.6228	72.122
213	21.3	85.73	72.122	71.9942	72.6228	72.122
214	21.4	69.1387	72.122	71.9942	72.6228	72.122
215	21.5	62.6815	72.122	71.9942	72.6228	72.122
216	21.6	80.5851	72.122	71.9942	72.6228	72.122
217	21.7	81.2689	72.122	71.9942	72.6228	72.122
218	21.8	71.1286	72.122	71.9942	72.6228	72.122
219	21.9	57.9558	72.122	71.9942	72.6228	72.122
220	22	47.8516	72.122	71.9942	72.6228	72.122
221	22.1	76.8562	72.122	71.9942	72.6228	72.122
222	22.2	58.728	72.122	71.9942	72.6228	72.122
223	22.3	59.5617	72.122	71.9942	72.6228	72.122
224	22.4	67.5207	72.122	71.9942	72.6228	72.122
225	22.5	66.8785	72.122	71.9942	72.6228	72.122
226	22.6	93.8908	72.122	71.9942	72.6228	72.122
227	22.7	62.5186	72.122	71.9942	72.6228	72.122
228	22.8	75.6791	72.122	71.9942	72.6228	72.122
229	22.9	64.6873	72.122	71.9942	72.6228	72.122
230	23	48.3403	72.122	71.9942	72.6228	72.122
231	23.1	79.8195	72.122	71.9942	72.6228	72.122
232	23.2	83.9443	72.122	71.9942	72.6228	72.122
233	23.3	50.8794	72.122	71.9942	72.6228	72.122
234	23.4	93.6804	72.122	71.9942	72.6228	72.122
235	23.5	72.4199	72.122	71.9942	72.6228	72.122
236	23.6	65.028	72.122	71.9942	72.6228	72.122
237	23.7	54.3968	72.122	71.9942	72.6228	72.122
238	23.8	67.1609	72.122	71.9942	72.6228	72.122
239	23.9	81.3361	72.122	71.9942	72.6228	72.122
240	24	72.6373	72.122	71.9942	72.6228	72.122
241	24.1	73.3803	72.122	71.9942	72.6228	72.122
242	24.2	76.7977	72.122	71.9942	72.6228	72.122
243	24.3	81.4008	72.122	71.9942	72.6228	72.122
244	24.4	68.6793	72.122	71.9942	72.6228	72.122
245	24.5	154.924	142.135	142.047	152.311	146.082
246	24.6	147.616	142.135	142.047	152.311	146.082
247	24.7	161.091	142.135	142.047	152.311	146.082
248	24.8	161.674	142.135	142.047	152.311	146.082
249	24.9	154.345	142.135	142.047	152.311	146.082
250	25	145.906	142.135	142.047	152.311	146.082
251	25.1	142.27	142.135	142.047	152.311	146.082
252	25.2	150.345	142.135	142.047	152.311	146.082
253	25.3	68.9505	72.122	71.9942	72.6228	72.122
254	25.4	57.8121	72.122	71.9942	72.6228	72.122
255	25.5	77.2549	72.122	71.9942	72.6228	72.122
256	25.6	69.6777	72.122	71.9942	72.6228	72.122
257	25.7	84.8264	72.122	71.9942	72.6228	72.122
258	25.8	78.0138	72.122	71.9942	72.6228	72.122
259	25.9	95.9208	72.122	71.9942	72.6228	72.122
260	26	59.2484	72.122	71.9942	72.6228	72.122
261	26.1	87.2259	72.122	71.9942	72.6228	72.122
262	26.2	78.9567	72.122	71.9942	72.6228	72.122
263	26.3	68.6254	72.122	71.9942	72.6228	72.122
264	26.4	96.3952	72.122	71.9942	72.6228	72.122
265	26.5	65.1781	72.122	71.9942	72.6228	72.122
266	26.6	82.6773	72.122	71.9942	72.6228	72.122
267	26.7	58.8289	72.122	71.9942	72.6228	72.122
268	26.8	65.7385	72.122	71.9942	72.6228	72.122
269	26.9	76.5386	72.122	71.9942	72.6228	72.122
270	27	92.8347	72.122	71.9942	72.6228	72.122
271	27.1	70.8767	72.122	71.9942	72.6228	72.122
272	27.2	106.228	72.122	71.9942	72.6228	72.122
273	27.3	97.2821	72.122	71.9942	72.6228	72.122
274	27.4	83.4288	72.122	71.9942	72.6228	72.122
275	27.5	67.2988	72.122	71.9942	72.6228	72.122
276	27.6	81.7249	72.122	71.9942	72.6228	72.122
277	27.7	67.4281	72.122	71.9942	72.6228	72.122
278	27.8	63.3378	72.122	71.9942	72.6228	72.122
279	27.9	63.7882	72.122	71.9942	72.6228	72.122
280	28	72.9267	72.122	71.9942	72.6228	72.122
281	28.1	58.902	72.122	71.9942	72.6228	72.122
282	28.2	75.0495	72.122	71.9942	72.6228	72.122
283	28.3	73.6253	72.122	71.9942	72.6228	72.122
284	28.4	76.4975	72.122	71.9942	72.6228	72.122
285	28.5	143.463	142.135	142.047	152.311	146.082
286	28.6	171.078	142.135	142.047	152.311	146.082
287	28.7	168.667	142.135	142.047	152.311	146.082
288	28.8	66.3035	72.122	71.9942	72.6228	72.122
289	28.9	76.3406	72.122	71.9942	72.6228	72.122
290	29	80.1703	72.122	71.9942	72.6228	72.122
291	29.1	76.4494	72.122	71.9942	72.6228	72.122
292	29.2	83.7752	72.122	71.9942	72.6228	72.122
293	29.3	83.431	72.122	71.9942	72.6228	72.122
294	29.4	74.1053	72.122	71.9942	72.6228	72.122
295	29.5	72.6282	72.122	71.9942	72.6228	72.122
296	29.6	61.0944	72.122	71.9942	72.6228	72.122
297	29.7	85.7871	72.122	71.9942	72.6228	72.122
298	29.8	59.9787	72.122	71.9942	72.6228	72.122
299	29.9	88.1361	72.122	71.9942	72.6228	72.122
300	30	65.1052	72.122	71.9942	72.6228	72.122
301	30.1	59.9707	72.122	71.9942	72.6228	72.122
302	30.2	84.1778	72.122	71.9942	72.6228	72.122
303	30.3	64.892	72.122	71.9942	72.6228	72.122
304	30.4	57.4099	72.122	71.9942	72.6228	72.122
305	30.5	87.645	72.122	71.9942	72.6228	72.122
306	30.6	96.3561	72.122	71.9942	72.6228	72.122
307	30.7	89.3079	72.122	71.9942	72.6228	72.122
308	30.8	62.5237	72.122	71.9942	72.6228	72.122
309	30.9	84.1717	72.122	71.9942	72.6228	72.122
310	31	55.9482	72.122	71.9942	72.6228	72.122
311	31.1	74.4085	72.122	71.9942	72.6228	72.122
312	31.2	74.4803	72.122	71.9942	72.6228	72.122
313	31.3	53.603	72.122	71.9942	72.6228	72.122
314	31.4	61.2922	72.122	71.9942	72.6228	72.122
315	31.5	73.9751	72.122	71.9942	72.6228	72.122
316	31.6	87.0255	72.122	71.9942	72.6228	72.122
317	31.7	63.2026	72.122	71.9942	72.6228	72.122
318	31.8	58.1002	72.122	71.9942	72.6228	72.122
319	31.9	58.8873	72.122	71.9942	72.6228	72.122
320	32	73.4272	72.122	71.9942	72.6228	72.122
321	32.1	60.4635	72.122	71.9942	72.6228	72.122
322	32.2	61.376	72.122	71.9942	72.6228	72.122
323	32.3	82.9867	72.122	71.9942	72.6228	72.122
324	32.4	75.8974	72.122	71.9942	72.6228	72.122
325	32.5	69.4177	72.122	71.9942	72.6228	72.122
326	32.6	83.5922	72.122	71.9942	72.6228	72.122
327	32.7	64.4108	72.122	71.9942	72.6228	72.122
328	32.8	41.7934	72.122	71.9942	72.6228	72.122
329	32.9	79.5173	72.122	71.9942	72.6228	72.122
330	33	69.473	72.122	71.9942	72.6228	72.122
331	33.1	74.4046	72.122	71.9942	72.6228	72.122
332	33.2	64.7242	72.122	71.9942	72.6228	72.122
333	33.3	61.968	72.122	71.9942	72.6228	72.122
334	33.4	74.712	72.122	71.9942	72.6228	72.122
335	33.5	75.95	72.122	71.9942	72.6228	72.122
336	33.6	49.5929	72.122	71.9942	72.6228	72.122
337	33.7	58.4919	72.122	71.9942	72.6228	72.122
338	33.8	47.0744	72.122	71.9942	72.6228	72.122
339	33.9	62.8859	72.122	71.9942	72.6228	72.122
340	34	64.9079	72.122	71.9942	72.6228	72.122
341	34.1	92.0666	72.122	71.9942	72.6228	72.122
342	34.2	60.1147	72.122	71.9942	72.6228	72.122
343	34.3	75.811	72.122	71.9942	72.6228	72.122
344	34.4	66.6849	72.122	71.9942	72.6228	72.122
345	34.5	71.0398	72.122	71.9942	72.6228	72.122
346	34.6	88.8052	72.122	71.9942	72.6228	72.122
347	34.7	75.5882	72.122	71.9942	72.6228	72.122
348	34.8	80.7038	72.122	71.9942	72.6228	72.122
349	34.9	72.384	72.122	71.9942	72.6228	72.122
350	35	67.2841	72.122	71.9942	72.6228	72.122
351	35.1	155.054	142.135	142.047	152.311	146.082
352	35.2	243.337	213.887	213.859	229.628	217.222
353	35.3	128.511	142.135	142.047	141.076	146.082
354	35.4	158.941	142.135	142.047	141.076	146.082
355	35.5	141.378	142.135	142.047	141.076	146.082
356	35.6	139.01	142.135	142.047	141.076	146.082
357	35.7	130.825	142.135	142.047	141.076	146.082
358	35.8	131.732	142.135	142.047	141.076	146.082
359	35.9	127.449	142.135	142.047	141.076	146.082
360	36	142.054	142.135	142.047	141.076	146.082
361	36.1	143.224	142.135	142.047	141.076	146.082
362	36.2	150.128	142.135	142.047	141.076	146.082
363	36.3	150.133	142.135	142.047	141.076	146.082
364	36.4	232.575	213.887	213.859	205.199	217.222
365	36.5	193.085	213.887	213.859	205.199	217.222
366	36.6	211.708	213.887	213.859	205.199	217.222
367	36.7	197.9	213.887	213.859	205.199	217.222
368	36.8	213.277	213.887	213.859	205.199	217.222
369	36.9	197.039	213.887	213.859	205.199	217.222
370	37	200.958	213.887	213.859	205.199	217.222
371	37.1	218.773	213.887	213.859	205.199	217.222
372	37.2	225.754	213.887	213.859	205.199	217.222
373	37.3	191.846	213.887	213.859	205.199	217.222
374	37.4	224.189	213.887	213.859	205.199	217.222
375	37.5	206.177	213.887	213.859	205.199	217.222
376	37.6	218.862	213.887	213.859	205.199	217.222
377	37.7	211.5	213.887	213.859	205.199	217.222
378	37.8	225.375	213.887	213.859	205.199	217.222
379	37.9	187.113	213.887	213.859	205.199	217.222
380	38	188.178	213.887	213.859	205.199	217.222
381	38.1	198.285	213.887	213.859	205.199	217.222
382	38.2	242.832	213.887	213.859	205.199	217.222
383	38.3	212.916	213.887	213.859	205.199	217.222
384	38.4	224.227	213.887	213.859	205.199	217.222
385	38.5	212.637	213.887	213.859	205.199	217.222
386	38.6	206.349	213.887	213.859	205.199	217.222
387	38.7	132.105	142.135	142.047	130.248	133.617
388	38.8	116.587	142.135	142.047	130.248	133.617
389	38.9	121.159	142.135	142.047	130.248	133.617
390	39	131.213	142.135	142.047	130.248	133.617
391	39.1	145.692	142.135	142.047	130.248	133.617
392	39.2	137.759	142.135	142.047	130.248	133.617
393	39.3	133.868	142.135	142.047	130.248	133.617
394	39.4	131.112	142.135	142.047	130.248	133.617
395	39.5	115.725	142.135	142.047	130.248	133.617
396	39.6	137.561	142.135	142.047	130.248	133.617
397	39.7	126.67	142.135	142.047	130.248	133.617
398	39.8	143.298	142.135	142.047	130.248	133.617
399	39.9	121.071	142.135	142.047	130.248	133.617
400	40	128.848	142.135	142.047	130.248	133.617
401	40.1	150.257	142.135	142.047	130.248	133.617
402	40.2	140.744	142.135	142.047	130.248	133.617
403	40.3	129.333	142.135	142.047	130.248	133.617
404	40.4	127.022	142.135	142.047	130.248	133.617
405	40.5	143.62	142.135	142.047	130.248	133.617
406	40.6	107.024	142.135	142.047	130.248	133.617
407	40.7	147.497	142.135	142.047	130.248	133.617
408	40.8	117.695	142.135	142.047	130.248	133.617
409	40.9	115.566	142.135	142.047	130.248	133.617
410	41	108.055	142.135	142.047	130.248	133.617
411	41.1	136.419	142.135	142.047	130.248	133.617
412	41.2	137.956	142.135	142.047	130.248	133.617
413	41.3	120.073	142.135	142.047	130.248	133.617
414	41.4	139.401	142.135	142.047	130.248	133.617
415	41.5	136.624	142.135	142.047	130.248	133.617
416	41.6	123.382	142.135	142.047	130.248	133.617
417	41.7	117.921	142.135	142.047	130.248	133.617
418	41.8	130.457	142.135	142.047	130.248	133.617
419	41.9	154.991	142.135	142.047	130.248	133.617
420	42	128.44	142.135	142.047	130.248	133.617
421	42.1	138.402	142.135	142.047	130.248	133.617
422	42.2	97.6201	142.135	142.047	130.248	133.617
423	42.3	120.259	142.135	142.047	130.248	133.617
424	42.4	61.2002	72.122	71.9942	72.6228	72.122
425	42.5	67.6739	72.122	71.9942	72.6228	72.122
426	42.6	124.122	142.135	142.047	141.076	146.082
427	42.7	157.339	142.135	142.047	141.076	146.082
428	42.8	140.24	142.135	142.047	141.076	146.082
429	42.9	125.744	142.135	142.047	141.076	146.082
430	43	148.823	142.135	142.047	141.076	146.082
431	43.1	41.96	72.122	71.9942	72.6228	72.122
432	43.2	65.0212	72.122	71.9942	72.6228	72.122
433	43.3	60.9423	72.122	71.9942	72.6228	72.122
434	43.4	72.8789	72.122	71.9942	72.6228	72.122
435	43.5	78.4472	72.122	71.9942	72.6228	72.122
436	43.6	55.1599	72.122	71.9942	72.6228	72.122
437	43.7	77.3286	72.122	71.9942	72.6228	72.122
438	43.8	163.822	142.135	142.047	152.311	146.082
439	43.9	132.024	142.135	142.047	152.311	146.082
440	44	65.6773	72.122	71.9942	72.6228	72.122
441	44.1	85.9594	72.122	71.9942	72.6228	72.122
442	44.2	90.6529	72.122	71.9942	72.6228	72.122
443	44.3	74.3715	72.122	71.9942	72.6228	72.122
444	44.4	139.824	142.135	142.047	152.311	146.082
445	44.5	138.87	142.135	142.047	152.311	146.082
446	44.6	153.696	142.135	142.047	152.311	146.082
447	44.7	139.58	142.135	142.047	152.311	146.082
448	44.8	141.572	142.135	142.047	152.311	146.082
449	44.9	155.434	142.135	142.047	152.311	146.082
450	45	146.47	142.135	142.047	152.311	146.082
451	45.1	154.245	142.135	142.047	152.311	146.082
452	45.2	125.745	142.135	142.047	152.311	146.082
453	45.3	150.75	142.135	142.047	152.311	146.082
454	45.4	154.536	142.135	142.047	152.311	146.082
455	45.5	157.151	142.135	142.047	152.311	146.082
456	45.6	163.558	142.135	142.047	152.311	146.082
457	45.7	150.893	142.135	142.047	152.311	146.082
458	45.8	143.918	142.135	142.047	152.311	146.082
459	45.9	142.235	142.135	142.047	152.311	146.082
460	46	164.109	142.135	142.047	152.311	146.082
461	46.1	149.523	142.135	142.047	152.311	146.082
462	46.2	155.139	142.135	142.047	152.311	146.082
463	46.3	143.979	142.135	142.047	152.311	146.082
464	46.4	146.004	142.135	142.047	152.311	146.082
465	46.5	150.808	142.135	142.047	152.311	146.082
466	46.6	154.513	142.135	142.047	152.311	146.082
467	46.7	146.132	142.135	142.047	152.311	146.082
468	46.8	143.505	142.135	142.047	152.311	146.082
469	46.9	174.16	142.135	142.047	152.311	146.082
470	47	133.961	142.135	142.047	152.311	146.082
471	47.1	159.287	142.135	142.047	152.311	146.082
472	47.2	129.116	142.135	142.047	152.311	146.082
473	47.3	165.67	142.135	142.047	152.311	146.082
474	47.4	129.168	142.135	142.047	152.311	146.082
475	47.5	126.072	142.135	142.047	152.311	146.082
476	47.6	162.754	142.135	142.047	152.311	146.082
477	47.7	142.187	142.135	142.047	152.311	146.082
478	47.8	212.829	213.887	213.859	216.398	217.222
479	47.9	215.583	213.887	213.859	216.398	217.222
480	48	215.845	213.887	213.859	216.398	217.222
481	48.1	223.355	213.887	213.859	216.398	217.222
482	48.2	200.49	213.887	213.859	216.398	217.222
483	48.3	223.331	213.887	213.859	216.398	217.222
484	48.4	206.432	213.887	213.859	216.398	217.222
485	48.5	220.535	213.887	213.859	216.398	217.222
486	48.6	199.926	213.887	213.859	216.398	217.222
487	48.7	231.199	213.887	213.859	216.398	217.222
488	48.8	281.122	282.195	281.735	282.751	282.195
489	48.9	274.705	282.195	281.735	282.751	282.195
490	49	272.829	282.195	281.735	282.751	282.195
491	49.1	219.861	213.887	213.859	229.628	217.222
492	49.2	239.079	213.887	213.859	229.628	217.222
493	49.3	134.415	142.135	142.047	130.248	133.617
494	49.4	141.646	142.135	142.047	130.248	133.617
495	49.5	138.056	142.135	142.047	130.248	133.617
496	49.6	142.708	142.135	142.047	130.248	133.617
497	49.7	129.483	142.135	142.047	130.248	133.617
498	49.8	125.297	142.135	142.047	130.248	133.617
499	49.9	215.989	213.887	213.859	205.199	204.233
500	50	207.698	213.887	213.859	205.199	204.233
501	50.1	181.132	213.887	213.859	205.199	204.233
502	50.2	192.576	213.887	213.859	205.199	204.233
503	50.3	198.821	213.887	213.859	205.199	204.233
504	50.4	222.29	213.887	213.859	205.199	204.233
505	50.5	199.611	213.887	213.859	205.199	204.233
506	50.6	215.029	213.887	213.859	205.199	204.233
507	50.7	179.546	213.887	213.859	205.199	204.233
508	50.8	215.166	213.887	213.859	205.199	204.233
509	50.9	218.233	213.887	213.859	205.199	204.233
510	51	199.71	213.887	213.859	205.199	204.233
511	51.1	205.462	213.887	213.859	205.199	204.233
512	51.2	214.928	213.887	213.859	205.199	204.233
513	51.3	220.514	213.887	213.859	205.199	204.233
514	51.4	201.943	213.887	213.859	205.199	204.233
515	51.5	203.091	213.887	213.859	205.199	204.233
516	51.6	216.056	213.887	213.859	205.199	204.233
517	51.7	204.829	213.887	213.859	205.199	204.233
518	51.8	223.208	213.887	213.859	205.199	204.233
519	51.9	206.885	213.887	213.859	205.199	204.233
520	52	212.22	213.887	213.859	205.199	204.233
521	52.1	192.122	213.887	213.859	205.199	204.233
522	52.2	255.279	282.195	281.735	229.628	282.195
523	52.3	261.124	282.195	281.735	229.628	282.195
524	52.4	199.669	213.887	213.859	205.199	217.222
525	52.5	213.946	213.887	213.859	205.199	217.222
526	52.6	135.874	142.135	142.047	141.076	146.082
527	52.7	136.185	142.135	142.047	141.076	146.082
528	52.8	150.204	142.135	142.047	141.076	146.082
529	52.9	150.452	142.135	142.047	141.076	146.082
530	53	161.018	142.135	142.047	141.076	146.082
531	53.1	82.9214	72.122	71.9942	72.6228	72.122
532	53.2	68.1181	72.122	71.9942	72.6228	72.122
533	53.3	68.3589	72.122	71.9942	72.6228	72.122
534	53.4	85.5107	72.122	71.9942	72.6228	72.122
535	53.5	60.1713	72.122	71.9942	72.6228	72.122
536	53.6	69.7743	72.122	71.9942	72.6228	72.122
537	53.7	78.981	72.122	71.9942	72.6228	72.122
538	53.8	73.223	72.122	71.9942	72.6228	72.122
539	53.9	72.614	72.122	71.9942	72.6228	72.122
540	54	72.5702	72.122	71.9942	72.6228	72.122
541	54.1	72.5989	72.122	71.9942	72.6228	72.122
542	54.2	49.7548	72.122	71.9942	72.6228	72.122
543	54.3	160.546	142.135	142.047	152.311	146.082
544	54.4	151.022	142.135	142.047	152.311	146.082
545	54.5	184.685	213.887	213.859	152.311	217.222
546	54.6	243.562	213.887	213.859	216.398	217.222
547	54.7	198.093	213.887	213.859	216.398	217.222
548	54.8	214.019	213.887	213.859	216.398	217.222
549	54.9	215.021	213.887	213.859	216.398	217.222
550	55	203.997	213.887	213.859	216.398	217.222
551	55.1	217.673	213.887	213.859	216.398	217.222
552	55.2	214.487	213.887	213.859	216.398	217.222
553	55.3	233.994	213.887	213.859	216.398	217.222
554	55.4	214.395	213.887	213.859	216.398	217.222
555	55.5	224.001	213.887	213.859	216.398	217.222
556	55.6	225.088	213.887	213.859	216.398	217.222
557	55.7	206.103	213.887	213.859	216.398	217.222
558	55.8	218.971	213.887	213.859	216.398	217.222
559	55.9	202.474	213.887	213.859	216.398	217.222
560	56	218.2	213.887	213.859	216.398	217.222
561	56.1	242.422	213.887	213.859	216.398	217.222
562	56.2	208.653	213.887	213.859	216.398	217.222
563	56.3	229.635	213.887	213.859	216.398	217.222
564	56.4	206.686	213.887	213.859	216.398	217.222
565	56.5	213.413	213.887	213.859	216.398	217.222
566	56.6	219.161	213.887	213.859	216.398	217.222
567	56.7	230.8	213.887	213.859	216.398	217.222
568	56.8	212.309	213.887	213.859	216.398	217.222
569	56.9	231.856	213.887	213.859	216.398	217.222
570	57	233.04	213.887	213.859	216.398	217.222
571	57.1	213.835	213.887	213.859	216.398	217.222
572	57.2	214.914	213.887	213.859	216.398	217.222
573	57.3	202.686	213.887	213.859	216.398	217.222
574	57.4	246.275	213.887	213.859	216.398	217.222
575	57.5	145.464	142.135	142.047	141.076	146.082
576	57.6	137.587	142.135	142.047	141.076	146.082
577	57.7	147.039	142.135	142.047	141.076	146.082
578	57.8	215.787	213.887	213.859	216.398	217.222
579	57.9	203.605	213.887	213.859	216.398	217.222
580	58	209.475	213.887	213.859	216.398	217.222
581	58.1	204.713	213.887	213.859	216.398	217.222
582	58.2	205.651	213.887	213.859	216.398	217.222
583	58.3	218.758	213.887	213.859	216.398	217.222
584	58.4	218.219	213.887	213.859	216.398	217.222
585	58.5	216.642	213.887	213.859	216.398	217.222
586	58.6	228.445	213.887	213.859	216.398	217.222
587	58.7	220.391	213.887	213.859	216.398	217.222
588	58.8	223.843	213.887	213.859	216.398	217.222
589	58.9	220.803	213.887	213.859	216.398	217.222
590	59	216.442	213.887	213.859	216.398	217.222
591	59.1	207.125	213.887	213.859	216.398	217.222
592	59.2	198.195	213.887	213.859	216.398	217.222
593	59.3	225.837	213.887	213.859	216.398	217.222
594	59.4	204.918	213.887	213.859	216.398	217.222
595	59.5	209.925	213.887	213.859	216.398	217.222
596	59.6	217.698	213.887	213.859	216.398	217.222
597	59.7	213.083	213.887	213.859	216.398	217.222
598	59.8	243.328	213.887	213.859	216.398	217.222
599	59.9	214.978	213.887	213.859	216.398	217.222
600	60	221.88	213.887	213.859	216.398	217.222
601	60.1	226.265	213.887	213.859	216.398	217.222
602	60.2	233.774	213.887	213.859	216.398	217.222
603	60.3	227.629	213.887	213.859	216.398	217.222
604	60.4	219.572	213.887	213.859	216.398	217.222
605	60.5	232.326	213.887	213.859	216.398	217.222
606	60.6	208.746	213.887	213.859	216.398	217.222
607	60.7	220.162	213.887	213.859	216.398	217.222
608	60.8	232.651	213.887	213.859	216.398	217.222
609	60.9	218.692	213.887	213.859	216.398	217.222
610	61	227.746	213.887	213.859	216.398	217.222
611	61.1	227.464	213.887	213.859	216.398	217.222
612	61.2	225.282	213.887	213.859	216.398	217.222
613	61.3	199.6	213.887	213.859	216.398	217.222
614	61.4	225.095	213.887	213.859	216.398	217.222
615	61.5	205.577	213.887	213.859	216.398	217.222
616	61.6	195.319	213.887	213.859	216.398	217.222
617	61.7	195.242	213.887	213.859	216.398	217.222
618	61.8	207.864	213.887	213.859	216.398	217.222
619	61.9	215.281	213.887	213.859	216.398	217.222
620	62	137.341	142.135	142.047	152.311	146.082
621	62.1	161.328	142.135	142.047	152.311	146.082
622	62.2	140.809	142.135	142.047	152.311	146.082
623	62.3	153.884	142.135	142.047	152.311	146.082
624	62.4	146.355	142.135	142.047	152.311	146.082
625	62.5	149.623	142.135	142.047	152.311	146.082
626	62.6	145.561	142.135	142.047	152.311	146.082
627	62.7	152.662	142.135	142.047	152.311	146.082
628	62.8	140.835	142.135	142.047	152.311	146.082
629	62.9	151.657	142.135	142.047	152.311	146.082
630	63	125.976	142.135	142.047	152.311	146.082
631	63.1	168.819	142.135	142.047	152.311	146.082
632	63.2	119.946	142.135	142.047	152.311	146.082
633	63.3	155.07	142.135	142.047	152.311	146.082
634	63.4	154.784	142.135	142.047	152.311	146.082
635	63.5	149.464	142.135	142.047	152.311	146.082
636	63.6	182.857	142.135	142.047	152.311	146.082
637	63.7	130.493	142.135	142.047	141.076	146.082
638	63.8	139.694	142.135	142.047	141.076	146.082
639	63.9	146.533	142.135	142.047	141.076	146.082
640	64	150.454	142.135	142.047	141.076	146.082
641	64.1	159.463	142.135	142.047	141.076	146.082
642	64.2	135.181	142.135	142.047	141.076	146.082
643	64.3	142.64	142.135	142.047	141.076	146.082
644	64.4	145.454	142.135	142.047	141.076	146.082
645	64.5	150.076	142.135	142.047	141.076	146.082
646	64.6	147.294	142.135	142.047	141.076	146.082
647	64.7	159.73	142.135	142.047	141.076	146.082
648	64.8	140.484	142.135	142.047	141.076	146.082
649	64.9	75.4209	72.122	71.9942	72.6228	72.122
650	65	95.3108	72.122	71.9942	72.6228	72.122
651	65.1	76.0709	72.122	71.9942	72.6228	72.122
652	65.2	66.4143	72.122	71.9942	72.6228	72.122
653	65.3	77.3787	72.122	71.9942	72.6228	72.122
654	65.4	83.0327	72.122	71.9942	72.6228	72.122
655	65.5	79.7288	72.122	71.9942	72.6228	72.122
656	65.6	84.6997	72.122	71.9942	72.6228	72.122
657	65.7	69.3667	72.122	71.9942	72.6228	72.122
658	65.8	73.2844	72.122	71.9942	72.6228	72.122
659	65.9	86.1084	72.122	71.9942	72.6228	72.122
660	66	73.9257	72.122	71.9942	72.6228	72.122
661	66.1	66.9547	72.122	71.9942	72.6228	72.122
662	66.2	67.7191	72.122	71.9942	72.6228	72.122
663	66.3	79.5688	72.122	71.9942	72.6228	72.122
664	66.4	52.1723	72.122	71.9942	72.6228	72.122
665	66.5	67.7138	72.122	71.9942	72.6228	72.122
666	66.6	81.8611	72.122	71.9942	72.6228	72.122
667	66.7	55.815	72.122	71.9942	72.6228	72.122
668	66.8	74.9673	72.122	71.9942	72.6228	72.122
669	66.9	51.9363	72.122	71.9942	72.6228	72.122
670	67	90.1715	72.122	71.9942	72.6228	72.122
671	67.1	74.0974	72.122	71.9942	72.6228	72.122
672	67.2	83.4201	72.122	71.9942	72.6228	72.122
673	67.3	90.979	72.122	71.9942	72.6228	72.122
674	67.4	71.6957	72.122	71.9942	72.6228	72.122
675	67.5	79.9391	72.122	71.9942	72.6228	72.122
676	67.6	61.2694	72.122	71.9942	72.6228	72.122
677	67.7	72.3618	72.122	71.9942	72.6228	72.122
678	67.8	94.7688	72.122	71.9942	72.6228	72.122
679	67.9	80.7665	72.122	71.9942	72.6228	72.122
680	68	65.7086	72.122	71.9942	72.6228	72.122
681	68.1	67.5965	72.122	71.9942	72.6228	72.122
682	68.2	63.7064	72.122	71.9942	72.6228	72.122
683	68.3	51.5029	72.122	71.9942	72.6228	72.122
684	68.4	60.2311	72.122	71.9942	72.6228	72.122
685	68.5	72.1528	72.122	71.9942	72.6228	72.122
686	68.6	66.268	72.122	71.9942	72.6228	72.122
687	68.7	63.2554	72.122	71.9942	72.6228	72.122
688	68.8	110.147	72.122	71.9942	72.6228	72.122
689	68.9	78.1807	72.122	71.9942	72.6228	72.122
690	69	81.9363	72.122	71.9942	72.6228	72.122
691	69.1	82.7349	72.122	71.9942	72.6228	72.122
692	69.2	72.5115	72.122	71.9942	72.6228	72.122
693	69.3	76.5355	72.122	71.9942	72.6228	72.122
694	69.4	69.7336	72.122	71.9942	72.6228	72.122
695	69.5	80.5031	72.122	71.9942	72.6228	72.122
696	69.6	90.0606	72.122	71.9942	72.6228	72.122
697	69.7	145.502	142.135	142.047	141.076	146.082
698	69.8	147.8	142.135	142.047	141.076	146.082
699	69.9	146.204	142.135	142.047	141.076	146.082
700	70	145.006	142.135	142.047	141.076	146.082
701	70.1	100.81	72.122	71.9942	141.076	72.122
702	70.2	66.6494	72.122	71.9942	72.6228	72.122
703	70.3	67.25	72.122	71.9942	72.6228	72.122
704	70.4	72.677	72.122	71.9942	72.6228	72.122
705	70.5	81.3344	72.122	71.9942	72.6228	72.122
706	70.6	65.0281	72.122	71.9942	72.6228	72.122
707	70.7	50.5217	72.122	71.9942	72.6228	72.122
708	70.8	58.6643	72.122	71.9942	72.6228	72.122
709	70.9	85.9148	72.122	71.9942	72.6228	72.122
710	71	96.943	72.122	71.9942	72.6228	72.122
711	71.1	63.0225	72.122	71.9942	72.6228	72.122
712	71.2	68.8246	72.122	71.9942	72.6228	72.122
713	71.3	72.3199	72.122	71.9942	72.6228	72.122
714	71.4	77.1197	72.122	71.9942	72.6228	72.122
715	71.5	73.1131	72.122	71.9942	72.6228	72.122
716	71.6	51.119	72.122	71.9942	72.6228	72.122
717	71.7	75.7457	72.122	71.9942	72.6228	72.122
718	71.8	79.4755	72.122	71.9942	72.6228	72.122
719	71.9	61.8753	72.122	71.9942	72.6228	72.122
720	72	81.8413	72.122	71.9942	72.6228	72.122
721	72.1	77.4906	72.122	71.9942	72.6228	72.122
722	72.2	69.2802	72.122	71.9942	72.6228	72.122
723	72.3	69.2463	72.122	71.9942	72.6228	72.122
724	72.4	141.733	142.135	142.047	72.6228	146.082
725	72.5	141.101	142.135	142.047	72.6228	146.082
726	72.6	131.799	142.135	142.047	72.6228	146.082
727	72.7	146.53	142.135	142.047	72.6228	146.082
728	72.8	64.1772	72.122	71.9942	72.6228	72.122
729	72.9	62.5162	72.122	71.9942	72.6228	72.122
730	73	69.6666	72.122	71.9942	72.6228	72.122
731	73.1	72.9879	72.122	71.9942	72.6228	72.122
732	73.2	87.8037	72.122	71.9942	72.6228	72.122
733	73.3	74.0048	72.122	71.9942	72.6228	72.122
734	73.4	63.4946	72.122	71.9942	72.6228	72.122
735	73.5	86.8193	72.122	71.9942	72.6228	72.122
736	73.6	71.9009	72.122	71.9942	72.6228	72.122
737	73.7	73.8444	72.122	71.9942	72.6228	72.122
738	73.8	80.971	72.122	71.9942	72.6228	72.122
739	73.9	38.9294	72.122	71.9942	72.6228	72.122
740	74	73.6178	72.122	71.9942	72.6228	72.122
741	74.1	78.8946	72.122	71.9942	72.6228	72.122
742	74.2	65.5483	72.122	71.9942	72.6228	72.122
743	74.3	82.1845	72.122	71.9942	72.6228	72.122
744	74.4	84.4389	72.122	71.9942	72.6228	72.122
745	74.5	69.299	72.122	71.9942	72.6228	72.122
746	74.6	78.0744	72.122	71.9942	72.6228	72.122
747	74.7	77.8659	72.122	71.9942	72.6228	72.122
748	74.8	86.5496	72.122	71.9942	72.6228	72.122
749	74.9	62.3525	72.122	71.9942	72.6228	72.122
750	75	66.599	72.122	71.9942	72.6228	72.122
751	75.1	55.3558	72.122	71.9942	72.6228	72.122
752	75.2	88.2251	72.122	71.9942	72.6228	72.122
753	75.3	61.5878	72.122	71.9942	72.6228	72.122
754	75.4	61.8826	72.122	71.9942	72.6228	72.122
755	75.5	145.235	142.135	142.047	141.076	146.082
756	75.6	156.473	142.135	142.047	141.076	146.082
757	75.7	152.216	142.135	142.047	141.076	146.082
758	75.8	144.055	142.135	142.047	141.076	146.082
759	75.9	160.778	142.135	142.047	141.076	146.082
760	76	134.235	142.135	142.047	141.076	146.082
761	76.1	160.883	142.135	142.047	141.076	146.082
762	76.2	136.441	142.135	142.047	141.076	133.617
763	76.3	110.017	142.135	142.047	141.076	133.617
764	76.4	144.191	142.135	142.047	141.076	133.617
765	76.5	140.925	142.135	142.047	141.076	133.617
766	76.6	136.225	142.135	142.047	141.076	133.617
767	76.7	143.937	142.135	142.047	141.076	133.617
768	76.8	129.603	142.135	142.047	141.076	133.617
769	76.9	144.749	142.135	142.047	141.076	133.617
770	77	129.536	142.135	142.047	141.076	133.617
771	77.1	146.089	142.135	142.047	141.076	133.617
772	77.2	152.558	142.135	142.047	141.076	133.617
773	77.3	149.247	142.135	142.047	141.076	133.617
774	77.4	132.033	142.135	142.047	141.076	133.617
775	77.5	131.831	142.135	142.047	141.076	133.617
776	77.6	121.529	142.135	142.047	141.076	133.617
777	77.7	135.416	142.135	142.047	141.076	133.617
778	77.8	213.566	213.887	213.859	216.398	217.222
779	77.9	200.471	213.887	213.859	216.398	217.222
780	78	203.451	213.887	213.859	216.398	217.222
781	78.1	218.158	213.887	213.859	216.398	217.222
782	78.2	222.176	213.887	213.859	216.398	217.222
783	78.3	238.78	213.887	213.859	216.398	217.222
784	78.4	225.575	213.887	213.859	216.398	217.222
785	78.5	198.57	213.887	213.859	216.398	217.222
786	78.6	153.733	142.135	142.047	152.311	146.082
787	78.7	146.221	142.135	142.047	152.311	146.082
788	78.8	163.515	142.135	142.047	152.311	146.082
789	78.9	211.738	213.887	213.859	152.311	217.222
790	79	194.632	213.887	213.859	152.311	217.222
791	79.1	149.339	142.135	142.047	152.311	146.082
792	79.2	138.004	142.135	142.047	141.076	146.082
793	79.3	147.445	142.135	142.047	141.076	146.082
794	79.4	145.637	142.135	142.047	141.076	146.082
795	79.5	139.641	142.135	142.047	141.076	146.082
796	79.6	135.167	142.135	142.047	141.076	146.082
797	79.7	130.31	142.135	142.047	141.076	146.082
798	79.8	61.5323	72.122	71.9942	72.6228	72.122
799	79.9	87.513	72.122	71.9942	72.6228	72.122
800	80	48.3715	72.122	71.9942	72.6228	72.122
801	80.1	60.4402	72.122	71.9942	72.6228	72.122
802	80.2	62.7735	72.122	71.9942	72.6228	72.122
803	80.3	66.6605	72.122	71.9942	72.6228	72.122
804	80.4	51.3613	72.122	71.9942	72.6228	72.122
805	80.5	88.6558	72.122	71.9942	72.6228	72.122
806	80.6	82.9775	72.122	71.9942	72.6228	72.122
807	80.7	70.8864	72.122	71.9942	72.6228	72.122
808	80.8	161.648	142.135	142.047	152.311	146.082
809	80.9	155.141	142.135	142.047	152.311	146.082
810	81	157.357	142.135	142.047	152.311	146.082
811	81.1	170.702	142.135	142.047	152.311	146.082
812	81.2	147.027	142.135	142.047	152.311	146.082
813	81.3	160.965	142.135	142.047	152.311	146.082
814	81.4	147.36	142.135	142.047	152.311	146.082
815	81.5	162.87	142.135	142.047	152.311	146.082
816	81.6	139.522	142.135	142.047	152.311	146.082
817	81.7	214.928	213.887	213.859	205.199	204.233
818	81.8	198.37	213.887	213.859	205.199	204.233
819	81.9	204.9	213.887	213.859	205.199	204.233
820	82	191.055	213.887	213.859	205.199	204.233
821	82.1	205.85	213.887	213.859	205.199	204.233
822	82.2	138.305	142.135	142.047	141.076	146.082
823	82.3	147.181	142.135	142.047	141.076	146.082
824	82.4	147.919	142.135	142.047	141.076	146.082
825	82.5	136.144	142.135	142.047	141.076	146.082
826	82.6	74.12	72.122	71.9942	72.6228	72.122
827	82.7	57.6592	72.122	71.9942	72.6228	72.122
828	82.8	66.4936	72.122	71.9942	72.6228	72.122
829	82.9	75.8823	72.122	71.9942	72.6228	72.122
830	83	75.0725	72.122	71.9942	72.6228	72.122
831	83.1	71.5794	72.122	71.9942	72.6228	72.122
832	83.2	84.1242	72.122	71.9942	72.6228	72.122
833	83.3	66.7084	72.122	71.9942	72.6228	72.122
834	83.4	61.7073	72.122	71.9942	72.6228	72.122
835	83.5	105.908	72.122	71.9942	72.6228	72.122
836	83.6	76.1986	72.122	71.9942	72.6228	72.122
837	83.7	65.1076	72.122	71.9942	72.6228	72.122
838	83.8	150.746	142.135	142.047	152.311	146.082
839	83.9	221.051	213.887	213.859	152.311	217.222
840	84	153.042	142.135	142.047	152.311	146.082
841	84.1	148.99	142.135	142.047	152.311	146.082
842	84.2	141.013	142.135	142.047	152.311	146.082
843	84.3	106.254	72.122	142.047	72.6228	72.122
844	84.4	90.6098	72.122	71.9942	72.6228	72.122
845	84.5	78.0563	72.122	71.9942	72.6228	72.122
846	84.6	61.5059	72.122	71.9942	72.6228	72.122
847	84.7	61.7989	72.122	71.9942	72.6228	72.122
848	84.8	58.0809	72.122	71.9942	72.6228	72.122
849	84.9	60.4587	72.122	71.9942	72.6228	72.122
850	85	74.1385	72.122	71.9942	72.6228	72.122
851	85.1	71.2187	72.122	71.9942	72.6228	72.122
852	85.2	85.5568	72.122	71.9942	72.6228	72.122
853	85.3	85.4139	72.122	71.9942	72.6228	72.122
854	85.4	47.6996	72.122	71.9942	72.6228	72.122
855	85.5	71.6993	72.122	71.9942	72.6228	72.122
856	85.6	59.4797	72.122	71.9942	72.6228	72.122
857	85.7	77.1523	72.122	71.9942	72.6228	72.122
858	85.8	94.8266	72.122	71.9942	72.6228	72.122
859	85.9	68.421	72.122	71.9942	72.6228	72.122
860	86	52.8582	72.122	71.9942	72.6228	72.122
861	86.1	63.2233	72.122	71.9942	72.6228	72.122
862	86.2	75.9019	72.122	71.9942	72.6228	72.122
863	86.3	78.4257	72.122	71.9942	72.6228	72.122
864	86.4	68.2917	72.122	71.9942	72.6228	72.122
865	86.5	77.8906	72.122	71.9942	72.6228	72.122
866	86.6	70.5013	72.122	71.9942	72.6228	72.122
867	86.7	73.1683	72.122	71.9942	72.6228	72.122
868	86.8	56.9029	72.122	71.9942	72.6228	72.122
869	86.9	81.8194	72.122	71.9942	72.6228	72.122
870	87	96.0053	72.122	71.9942	72.6228	72.122
871	87.1	52.9997	72.122	71.9942	72.6228	72.122
872	87.2	74.7746	72.122	71.9942	72.6228	72.122
873	87.3	59.8894	72.122	71.9942	72.6228	72.122
874	87.4	95.0885	72.122	71.9942	72.6228	72.122
875	87.5	74.1003	72.122	71.9942	72.6228	72.122
876	87.6	140.397	142.135	142.047	141.076	146.082
877	87.7	160.185	142.135	142.047	141.076	146.082
878	87.8	156.485	142.135	142.047	141.076	146.082
879	87.9	161.428	142.135	142.047	141.076	146.082
880	88	126.729	142.135	142.047	141.076	146.082
881	88.1	126.682	142.135	142.047	141.076	146.082
882	88.2	144.075	142.135	142.047	141.076	146.082
883	88.3	146.884	142.135	142.047	141.076	146.082
884	88.4	165.05	142.135	142.047	141.076	146.082
885	88.5	137.329	142.135	142.047	141.076	133.617
886	88.6	142.351	142.135	142.047	141.076	133.617
887	88.7	124.57	142.135	142.047	141.076	133.617
888	88.8	125.132	142.135	142.047	141.076	133.617
889	88.9	132.173	142.135	142.047	141.076	133.617
890	89	119.795	142.135	142.047	141.076	133.617
891	89.1	114.858	142.135	142.047	141.076	133.617
892	89.2	146.233	142.135	142.047	141.076	133.617
893	89.3	125.681	142.135	142.047	141.076	133.617
894	89.4	160.852	142.135	142.047	141.076	146.082
895	89.5	166.115	142.135	142.047	141.076	146.082
896	89.6	137.413	142.135	142.047	141.076	146.082
897	89.7	147.271	142.135	142.047	141.076	146.082
898	89.8	141.708	142.135	142.047	141.076	146.082
899	89.9	154.572	142.135	142.047	141.076	146.082
900	90	152.808	142.135	142.047	141.076	146.082
901	90.1	137.096	142.135	142.047	141.076	146.082
902	90.2	150.579	142.135	142.047	141.076	146.082
903	90.3	145.765	142.135	142.047	141.076	146.082
904	90.4	157.903	142.135	142.047	141.076	146.082
905	90.5	159.439	142.135	142.047	141.076	146.082
906	90.6	138.881	142.135	142.047	141.076	146.082
907	90.7	147.707	142.135	142.047	141.076	146.082
908	90.8	67.8014	72.122	71.9942	72.6228	72.122
909	90.9	69.3452	72.122	71.9942	72.6228	72.122
910	91	81.4944	72.122	71.9942	72.6228	72.122
911	91.1	68.5891	72.122	71.9942	72.6228	72.122
912	91.2	83.0452	72.122	71.9942	72.6228	72.122
913	91.3	55.8703	72.122	71.9942	72.6228	72.122
914	91.4	64.6071	72.122	71.9942	72.6228	72.122
915	91.5	72.0869	72.122	71.9942	72.6228	72.122
916	91.6	74.6313	72.122	71.9942	72.6228	72.122
917	91.7	91.0297	72.122	71.9942	72.6228	72.122
918	91.8	77.4756	72.122	71.9942	72.6228	72.122
919	91.9	80.3941	72.122	71.9942	72.6228	72.122
920	92	75.5695	72.122	71.9942	72.6228	72.122
921	92.1	87.5312	72.122	71.9942	72.6228	72.122
922	92.2	68.6449	72.122	71.9942	72.6228	72.122
923	92.3	54.3848	72.122	71.9942	72.6228	72.122
924	92.4	79.8703	72.122	71.9942	72.6228	72.122
925	92.5	83.3871	72.122	71.9942	72.6228	72.122
926	92.6	160.995	142.135	142.047	152.311	146.082
927	92.7	149.725	142.135	142.047	152.311	146.082
928	92.8	148.057	142.135	142.047	152.311	146.082
929	92.9	148.768	142.135	142.047	152.311	146.082
930	93	163.772	142.135	142.047	152.311	146.082
931	93.1	169.631	142.135	142.047	152.311	146.082
932	93.2	136.703	142.135	142.047	152.311	146.082
933	93.3	160.597	142.135	142.047	152.311	146.082
934	93.4	141.598	142.135	142.047	152.311	146.082
935	93.5	161.772	142.135	142.047	152.311	146.082
936	93.6	144.391	142.135	142.047	152.311	146.082
937	93.7	147.009	142.135	142.047	152.311	146.082
938	93.8	172.983	142.135	142.047	152.311	146.082
939	93.9	150.624	142.135	142.047	152.311	146.082
940	94	178.203	142.135	142.047	152.311	146.082
941	94.1	153.52	142.135	142.047	152.311	146.082
942	94.2	142.626	142.135	142.047	152.311	146.082
943	94.3	61.4462	72.122	71.9942	72.6228	72.122
944	94.4	54.7924	72.122	71.9942	72.6228	72.122
945	94.5	82.1532	72.122	71.9942	72.6228	72.122
946	94.6	52.4718	72.122	71.9942	72.6228	72.122
947	94.7	47.7518	72.122	71.9942	72.6228	72.122
948	94.8	67.4845	72.122	71.9942	72.6228	72.122
949	94.9	75.1835	72.122	71.9942	72.6228	72.122
950	95	94.6033	72.122	71.9942	72.6228	72.122
951	95.1	55.7006	72.122	71.9942	72.6228	72.122
952	95.2	85.7264	72.122	71.9942	72.6228	72.122
953	95.3	70.6492	72.122	71.9942	72.6228	72.122
954	95.4	65.04	72.122	71.9942	72.6228	72.122
955	95.5	44.8566	72.122	71.9942	72.6228	72.122
956	95.6	56.9373	72.122	71.9942	72.6228	72.122
957	95.7	72.4539	72.122	71.9942	72.6228	72.122
958	95.8	88.5149	72.122	71.9942	72.6228	72.122
959	95.9	38.1068	72.122	71.9942	72.6228	72.122
960	96	74.1471	72.122	71.9942	72.6228	72.122
961	96.1	56.632	72.122	71.9942	72.6228	72.122
962	96.2	55.1794	72.122	71.9942	72.6228	72.122
963	96.3	48.2077	72.122	71.9942	72.6228	72.122
964	96.4	86.6476	72.122	71.9942	72.6228	72.122
965	96.5	94.7879	72.122	71.9942	72.6228	72.122
966	96.6	60.4283	72.122	71.9942	72.6228	72.122
967	96.7	73.2549	72.122	71.9942	72.6228	72.122
968	96.8	77.1321	72.122	71.9942	72.6228	72.122
969	96.9	55.4891	72.122	71.9942	72.6228	72.122
970	97	90.5864	72.122	71.9942	72.6228	72.122
971	97.1	75.8581	72.122	71.9942	72.6228	72.122
972	97.2	64.5744	72.122	71.9942	72.6228	72.122
973	97.3	134.55	142.135	142.047	141.076	146.082
974	97.4	139.679	142.135	142.047	141.076	146.082
975	97.5	149.047	142.135	142.047	141.076	146.082
976	97.6	127.653	142.135	142.047	141.076	146.082
977	97.7	134.361	142.135	142.047	141.076	146.082
978	97.8	142.745	142.135	142.047	141.076	146.082
979	97.9	129.778	142.135	142.047	141.076	146.082
980	98	142.36	142.135	142.047	141.076	146.082
981	98.1	149.604	142.135	142.047	141.076	146.082
982	98.2	143.478	142.135	142.047	141.076	146.082
983	98.3	46.292	72.122	71.9942	72.6228	72.122
984	98.4	104.307	72.122	71.9942	72.6228	72.122
985	98.5	73.2772	72.122	71.9942	72.6228	72.122
986	98.6	68.0942	72.122	71.9942	72.6228	72.122
987	98.7	68.0156	72.122	71.9942	72.6228	72.122
988	98.8	133.821	142.135	142.047	130.248	133.617
989	98.9	125.092	142.135	142.047	130.248	133.617
990	99	116.457	142.135	142.047	130.248	133.617
991	99.1	126.603	142.135	142.047	130.248	133.617
992	99.2	154.925	142.135	142.047	130.248	133.617
993	99.3	124.129	142.135	142.047	130.248	133.617
994	99.4	111.604	142.135	142.047	130.248	133.617
995	99.5	124.112	142.135	142.047	130.248	133.617
996	99.6	232.6	213.887	213.859	229.628	217.222
997	99.7	206.601	213.887	213.859	229.628	217.222
998	99.8	220.878	213.887	213.859	229.628	217.222
999	99.9	287.63	282.195	281.735	229.628	282.195
1000	100	230.957	213.887	213.859	229.628	217.222
1001	100.1	230.346	213.887	213.859	229.628	217.222
1002	100.2	233.485	213.887	213.859	229.628	217.222
1003	100.3	143.348	142.135	142.047	152.311	146.082
1004	100.4	156.878	142.135	142.047	152.311	146.082
1005	100.5	128.192	142.135	142.047	152.311	146.082
1006	100.6	164.415	142.135	142.047	152.311	146.082
1007	100.7	143.71	142.135	142.047	152.311	146.082
1008	100.8	147.388	142.135	142.047	152.311	146.082
1009	100.9	159.602	142.135	142.047	152.311	146.082
1010	101	78.282	72.122	71.9942	72.6228	72.122
1011	101.1	73.215	72.122	71.9942	72.6228	72.122
1012	101.2	74.4696	72.122	71.9942	72.6228	72.122
1013	101.3	79.3804	72.122	71.9942	72.6228	72.122
1014	101.4	82.8104	72.122	71.9942	72.6228	72.122
1015	101.5	85.2488	72.122	71.9942	72.6228	72.122
1016	101.6	85.1282	72.122	71.9942	72.6228	72.122
1017	101.7	74.089	72.122	71.9942	72.6228	72.122
1018	101.8	66.8244	72.122	71.9942	72.6228	72.122
1019	101.9	64.9508	72.122	71.9942	72.6228	72.122
1020	102	68.0184	72.122	71.9942	72.6228	72.122
1021	102.1	91.2386	72.122	71.9942	72.6228	72.122
1022	102.2	60.7074	72.122	71.9942	72.6228	72.122
1023	102.3	78.9079	72.122	71.9942	72.6228	72.122
1024	102.4	87.6197	72.122	71.9942	72.6228	72.122
1025	102.5	74.7454	72.122	71.9942	72.6228	72.122
1026	102.6	81.2118	72.122	71.9942	72.6228	72.122
1027	102.7	87.6237	72.122	71.9942	72.6228	72.122
1028	102.8	59.4605	72.122	71.9942	72.6228	72.122
1029	102.9	79.9738	72.122	71.9942	72.6228	72.122
1030	103	86.7805	72.122	71.9942	72.6228	72.122
1031	103.1	99.4619	72.122	71.9942	72.6228	72.122
1032	103.2	75.5698	72.122	71.9942	72.6228	72.122
1033	103.3	74.7207	72.122	71.9942	72.6228	72.122
1034	103.4	73.2128	72.122	71.9942	72.6228	72.122
1035	103.5	65.4698	72.122	71.9942	72.6228	72.122
1036	103.6	64.7894	72.122	71.9942	72.6228	72.122
1037	103.7	74.8612	72.122	71.9942	72.6228	72.122
1038	103.8	89.8903	72.122	71.9942	72.6228	72.122
1039	103.9	59.9784	72.122	71.9942	72.6228	72.122
1040	104	77.2496	72.122	71.9942	72.6228	72.122
1041	104.1	67.6311	72.122	71.9942	72.6228	72.122
1042	104.2	65.2731	72.122	71.9942	72.6228	72.122
1043	104.3	73.5747	72.122	71.9942	72.6228	72.122
1044	104.4	80.0929	72.122	71.9942	72.6228	72.122
1045	104.5	74.0776	72.122	71.9942	72.6228	72.122
1046	104.6	67.5897	72.122	71.9942	72.6228	72.122
1047	104.7	66.9145	72.122	71.9942	72.6228	72.122
1048	104.8	83.9997	72.122	71.9942	72.6228	72.122
1049	104.9	65.6083	72.122	71.9942	72.6228	72.122
1050	105	70.0575	72.122	71.9942	72.6228	72.122
1051	105.1	89.6459	72.122	71.9942	72.6228	72.122
1052	105.2	97.4353	72.122	71.9942	72.6228	72.122
1053	105.3	55.4706	72.122	71.9942	72.6228	72.122
1054	105.4	65.5756	72.122	71.9942	72.6228	72.122
1055	105.5	64.006	72.122	71.9942	72.6228	72.122
1056	105.6	83.6661	72.122	71.9942	72.6228	72.122
1057	105.7	68.4691	72.122	71.9942	72.6228	72.122
1058	105.8	139.979	142.135	142.047	130.248	133.617
1059	105.9	152.093	142.135	142.047	130.248	133.617
1060	106	127.626	142.135	142.047	130.248	133.617
1061	106.1	145.288	142.135	142.047	130.248	133.617
1062	106.2	137.795	142.135	142.047	130.248	133.617
1063	106.3	140.165	142.135	142.047	130.248	133.617
1064	106.4	145.427	142.135	142.047	130.248	133.617
1065	106.5	134.712	142.135	142.047	130.248	133.617
1066	106.6	134.936	142.135	142.047	130.248	133.617
1067	106.7	124.002	142.135	142.047	130.248	133.617
1068	106.8	120.815	142.135	142.047	130.248	133.617
1069	106.9	124.806	142.135	142.047	130.248	133.617
1070	107	141.672	142.135	142.047	130.248	133.617
1071	107.1	128.729	142.135	142.047	130.248	133.617
1072	107.2	128.268	142.135	142.047	130.248	133.617
1073	107.3	141.626	142.135	142.047	130.248	133.617
1074	107.4	146.902	142.135	142.047	130.248	133.617
1075	107.5	112.674	142.135	142.047	130.248	133.617
1076	107.6	200.165	213.887	213.859	205.199	204.233
1077	107.7	121.045	142.135	142.047	130.248	133.617
1078	107.8	121.739	142.135	142.047	130.248	133.617
1079	107.9	124.406	142.135	142.047	130.248	133.617
1080	108	104.99	142.135	142.047	130.248	133.617
1081	108.1	122.107	142.135	142.047	130.248	133.617
1082	108.2	113.746	142.135	142.047	130.248	133.617
1083	108.3	122.668	142.135	142.047	130.248	133.617
1084	108.4	139.792	142.135	142.047	130.248	133.617
1085	108.5	104.016	142.135	142.047	130.248	133.617
1086	108.6	146.574	142.135	142.047	130.248	133.617
1087	108.7	137.727	142.135	142.047	130.248	133.617
1088	108.8	114.423	142.135	142.047	130.248	133.617
1089	108.9	120.717	142.135	142.047	130.248	133.617
1090	109	131.866	142.135	142.047	130.248	133.617
1091	109.1	109.493	142.135	142.047	130.248	133.617
1092	109.2	121.68	142.135	142.047	130.248	133.617
1093	109.3	211.25	213.887	213.859	205.199	204.233
1094	109.4	192.99	213.887	213.859	205.199	204.233
1095	109.5	196.796	213.887	213.859	205.199	204.233
1096	109.6	213.234	213.887	213.859	205.199	204.233
1097	109.7	199.002	213.887	213.859	205.199	204.233
1098	109.8	209.553	213.887	213.859	205.199	204.233
1099	109.9	226.922	213.887	213.859	205.199	204.233
1100	110	207.778	213.887	213.859	205.199	204.233
1101	110.1	203.735	213.887	213.859	205.199	204.233
1102	110.2	139.777	142.135	142.047	141.076	133.617
1103	110.3	122.057	142.135	142.047	141.076	133.617
1104	110.4	152.041	142.135	142.047	141.076	133.617
1105	110.5	145.315	142.135	142.047	141.076	133.617
1106	110.6	135.673	142.135	142.047	141.076	133.617
1107	110.7	132.352	142.135	142.047	141.076	133.617
1108	110.8	141.148	142.135	142.047	141.076	133.617
1109	110.9	206.517	213.887	213.859	205.199	204.233
1110	111	193.745	213.887	213.859	205.199	204.233
1111	111.1	203.693	213.887	213.859	205.199	204.233
1112	111.2	199.885	213.887	213.859	205.199	204.233
1113	111.3	210.595	213.887	213.859	205.199	204.233
1114	111.4	287.056	282.195	281.735	282.751	282.195
1115	111.5	286.376	282.195	281.735	282.751	282.195
1116	111.6	294.268	282.195	281.735	282.751	282.195
1117	111.7	288.064	282.195	281.735	282.751	282.195
1118	111.8	294.801	282.195	281.735	282.751	282.195
1119	111.9	287.904	282.195	281.735	282.751	282.195
1120	112	262.587	282.195	281.735	282.751	282.195
1121	112.1	284.184	282.195	281.735	282.751	282.195
1122	112.2	270.253	282.195	281.735	282.751	282.195
1123	112.3	276.847	282.195	281.735	282.751	282.195
1124	112.4	225.383	213.887	213.859	216.398	217.222
1125	112.5	221.286	213.887	213.859	216.398	217.222
1126	112.6	219.413	213.887	213.859	216.398	217.222
1127	112.7	231.451	213.887	213.859	216.398	217.222
1128	112.8	201.442	213.887	213.859	216.398	217.222
1129	112.9	209.507	213.887	213.859	216.398	217.222
1130	113	233.957	213.887	213.859	216.398	217.222
1131	113.1	217.151	213.887	213.859	216.398	217.222
1132	113.2	231.528	213.887	213.859	216.398	217.222
1133	113.3	200.61	213.887	213.859	216.398	217.222
1134	113.4	237.207	213.887	213.859	216.398	217.222
1135	113.5	219.217	213.887	213.859	216.398	217.222
1136	113.6	228.047	213.887	213.859	216.398	217.222
1137	113.7	201.21	213.887	213.859	216.398	217.222
1138	113.8	214.091	213.887	213.859	216.398	217.222
1139	113.9	210.501	213.887	213.859	216.398	217.222
1140	114	199.761	213.887	213.859	216.398	217.222
1141	114.1	236.888	213.887	213.859	216.398	217.222
1142	114.2	207.75	213.887	213.859	216.398	217.222
1143	114.3	238.198	213.887	213.859	216.398	217.222
1144	114.4	205.833	213.887	213.859	216.398	217.222
1145	114.5	227.424	213.887	213.859	216.398	217.222
1146	114.6	216.298	213.887	213.859	216.398	217.222
1147	114.7	215.13	213.887	213.859	216.398	217.222
1148	114.8	215.578	213.887	213.859	216.398	217.222
1149	114.9	140.118	142.135	142.047	152.311	146.082
1150	115	144.344	142.135	142.047	152.311	146.082
1151	115.1	130.277	142.135	142.047	152.311	146.082
1152	115.2	141.392	142.135	142.047	152.311	146.082
1153	115.3	150.65	142.135	142.047	152.311	146.082
1154	115.4	161.758	142.135	142.047	152.311	146.082
1155	115.5	150.857	142.135	142.047	152.311	146.082
1156	115.6	143.581	142.135	142.047	152.311	146.082
1157	115.7	159.524	142.135	142.047	152.311	146.082
1158	115.8	164.202	142.135	142.047	152.311	146.082
1159	115.9	150.702	142.135	142.047	152.311	146.082
1160	116	172.49	142.135	142.047	152.311	146.082
1161	116.1	154.649	142.135	142.047	152.311	146.082
1162	116.2	148.378	142.135	142.047	152.311	146.082
1163	116.3	149.389	142.135	142.047	152.311	146.082
1164	116.4	136.092	142.135	142.047	152.311	146.082
1165	116.5	165.109	142.135	142.047	152.311	146.082
1166	116.6	133.942	142.135	142.047	152.311	146.082
1167	116.7	159.943	142.135	142.047	152.311	146.082
1168	116.8	137.238	142.135	142.047	152.311	146.082
1169	116.9	142.037	142.135	142.047	152.311	146.082
1170	117	138.237	142.135	142.047	152.311	146.082
1171	117.1	145.769	142.135	142.047	152.311	146.082
1172	117.2	144.968	142.135	142.047	152.311	146.082
1173	117.3	144.551	142.135	142.047	152.311	146.082
1174	117.4	138.993	142.135	142.047	152.311	146.082
1175	117.5	218.276	213.887	213.859	216.398	217.222
1176	117.6	218.218	213.887	213.859	216.398	217.222
1177	117.7	225.71	213.887	213.859	216.398	217.222
1178	117.8	215.017	213.887	213.859	216.398	217.222
1179	117.9	223.456	213.887	213.859	216.398	217.222
1180	118	226.471	213.887	213.859	216.398	217.222
1181	118.1	225.418	213.887	213.859	216.398	217.222
1182	118.2	205.537	213.887	213.859	216.398	217.222
1183	118.3	240.293	213.887	213.859	216.398	217.222
1184	118.4	239.722	213.887	213.859	216.398	217.222
1185	118.5	220.033	213.887	213.859	216.398	217.222
1186	118.6	214.314	213.887	213.859	216.398	217.222
1187	118.7	220.636	213.887	213.859	216.398	217.222
1188	118.8	201.818	213.887	213.859	216.398	217.222
1189	118.9	234.534	213.887	213.859	216.398	217.222
1190	119	204.528	213.887	213.859	216.398	217.222
1191	119.1	136.558	142.135	142.047	141.076	146.082
1192	119.2	58.958	72.122	71.9942	72.6228	72.122
1193	119.3	66.4053	72.122	71.9942	72.6228	72.122
1194	119.4	63.2371	72.122	71.9942	72.6228	72.122
1195	119.5	57.8173	72.122	71.9942	72.6228	72.122
1196	119.6	55.728	72.122	71.9942	72.6228	72.122
1197	119.7	71.4821	72.122	71.9942	72.6228	72.122
1198	119.8	77.3469	72.122	71.9942	72.6228	72.122
1199	119.9	76.1564	72.122	71.9942	72.6228	72.122
1200	120	58.6856	72.122	71.9942	72.6228	72.122
1201	120.1	58.3962	72.122	71.9942	72.6228	72.122
1202	120.2	84.6037	72.122	71.9942	72.6228	72.122
1203	120.3	63.6916	72.122	71.9942	72.6228	72.122
1204	120.4	68.4906	72.122	71.9942	72.6228	72.122
1205	120.5	54.9003	72.122	71.9942	72.6228	72.122
1206	120.6	140.79	142.135	142.047	141.076	146.082
1207	120.7	145.624	142.135	142.047	141.076	146.082
1208	120.8	118.48	142.135	142.047	141.076	146.082
1209	120.9	152.999	142.135	142.047	141.076	146.082
1210	121	130.408	142.135	142.047	141.076	146.082
1211	121.1	139.323	142.135	142.047	141.076	146.082
1212	121.2	151.317	142.135	142.047	141.076	146.082
1213	121.3	136.483	142.135	142.047	141.076	146.082
1214	121.4	131.988	142.135	142.047	141.076	146.082
1215	121.5	137.511	142.135	142.047	141.076	146.082
1216	121.6	118.696	142.135	142.047	141.076	146.082
1217	121.7	131.5	142.135	142.047	141.076	146.082
1218	121.8	167.064	142.135	142.047	141.076	146.082
1219	121.9	133.803	142.135	142.047	141.076	146.082
1220	122	134.222	142.135	142.047	141.076	146.082
1221	122.1	123.213	142.135	142.047	141.076	146.082
1222	122.2	147.059	142.135	142.047	141.076	146.082
1223	122.3	132.216	142.135	142.047	141.076	146.082
1224	122.4	170.559	142.135	142.047	141.076	146.082
1225	122.5	155.987	142.135	142.047	141.076	146.082
1226	122.6	150.143	142.135	142.047	141.076	146.082
1227	122.7	124.713	142.135	142.047	141.076	146.082
1228	122.8	155.681	142.135	142.047	141.076	146.082
1229	122.9	142.689	142.135	142.047	141.076	146.082
1230	123	139.168	142.135	142.047	141.076	146.082
1231	123.1	153.982	142.135	142.047	141.076	146.082
1232	123.2	156.075	142.135	142.047	141.076	146.082
1233	123.3	143.916	142.135	142.047	141.076	146.082
1234	123.4	163.347	142.135	142.047	141.076	146.082
1235	123.5	125.826	142.135	142.047	141.076	146.082
1236	123.6	147.611	142.135	142.047	141.076	146.082
1237	123.7	146.012	142.135	142.047	141.076	146.082
1238	123.8	131.948	142.135	142.047	141.076	146.082
1239	123.9	156.547	142.135	142.047	141.076	146.082
1240	124	137.292	142.135	142.047	141.076	146.082
1241	124.1	120.005	142.135	142.047	141.076	146.082
1242	124.2	140.921	142.135	142.047	141.076	146.082
1243	124.3	141.963	142.135	142.047	141.076	146.082
1244	124.4	64.1097	72.122	71.9942	72.6228	72.122
1245	124.5	56.2287	72.122	71.9942	72.6228	72.122
1246	124.6	70.0332	72.122	71.9942	72.6228	72.122
1247	124.7	67.9636	72.122	71.9942	72.6228	72.122
1248	124.8	80.703	72.122	71.9942	72.6228	72.122
1249	124.9	91.9333	72.122	71.9942	72.6228	72.122
1250	125	64.4338	72.122	71.9942	72.6228	72.122
1251	125.1	62.3817	72.122	71.9942	72.6228	72.122
1252	125.2	77.9948	72.122	71.9942	72.6228	72.122
1253	125.3	67.4839	72.122	71.9942	72.6228	72.122
1254	125.4	62.5095	72.122	71.9942	72.6228	72.122
1255	125.5	75.1298	72.122	71.9942	72.6228	72.122
1256	125.6	51.3334	72.122	71.9942	72.6228	72.122
1257	125.7	66.0183	72.122	71.9942	72.6228	72.122
1258	125.8	66.1867	72.122	71.9942	72.6228	72.122
1259	125.9	73.0577	72.122	71.9942	72.6228	72.122
1260	126	78.8468	72.122	71.9942	72.6228	72.122
1261	126.1	79.2271	72.122	71.9942	72.6228	72.122
1262	126.2	60.7109	72.122	71.9942	72.6228	72.122
1263	126.3	97.5257	72.122	71.9942	72.6228	72.122
1264	126.4	65.7085	72.122	71.9942	72.6228	72.122
1265	126.5	60.0239	72.122	71.9942	72.6228	72.122
1266	126.6	153.391	142.135	142.047	141.076	146.082
1267	126.7	120.013	142.135	142.047	141.076	146.082
1268	126.8	163.023	142.135	142.047	141.076	146.082
1269	126.9	79.3072	72.122	71.9942	72.6228	72.122
1270	127	91.3569	72.122	71.9942	72.6228	72.122
1271	127.1	67.6466	72.122	71.9942	72.6228	72.122
1272	127.2	61.1851	72.122	71.9942	72.6228	72.122
1273	127.3	58.7284	72.122	71.9942	72.6228	72.122
1274	127.4	81.9377	72.122	71.9942	72.6228	72.122
1275	127.5	85.7174	72.122	71.9942	72.6228	72.122
1276	127.6	59.06	72.122	71.9942	72.6228	72.122
1277	127.7	47.8025	72.122	71.9942	72.6228	72.122
1278	127.8	61.6855	72.122	71.9942	72.6228	72.122
1279	127.9	82.1388	72.122	71.9942	72.6228	72.122
1280	128	60.556	72.122	71.9942	72.6228	72.122
1281	128.1	130.885	142.135	142.047	152.311	146.082
1282	128.2	161.861	142.135	142.047	152.311	146.082
1283	128.3	144.496	142.135	142.047	152.311	146.082
1284	128.4	142.862	142.135	142.047	152.311	146.082
1285	128.5	149.166	142.135	142.047	152.311	146.082
1286	128.6	145.185	142.135	142.047	152.311	146.082
1287	128.7	138.39	142.135	142.047	152.311	146.082
1288	128.8	137.242	142.135	142.047	152.311	146.082
1289	128.9	144.211	142.135	142.047	152.311	146.082
1290	129	173.007	142.135	142.047	152.311	146.082
1291	129.1	144.711	142.135	142.047	152.311	146.082
1292	129.2	141.5	142.135	142.047	152.311	146.082
1293	129.3	156.844	142.135	142.047	152.311	146.082
1294	129.4	165.33	142.135	142.047	152.311	146.082
1295	129.5	149.468	142.135	142.047	152.311	146.082
1296	129.6	158.444	142.135	142.047	152.311	146.082
1297	129.7	162.204	142.135	142.047	152.311	146.082
1298	129.8	158.893	142.135	142.047	152.311	146.082
1299	129.9	123.698	142.135	142.047	152.311	146.082
1300	130	170.745	142.135	142.047	152.311	146.082
1301	130.1	152.23	142.135	142.047	152.311	146.082
1302	130.2	152.395	142.135	142.047	152.311	146.082
1303	130.3	67.2252	72.122	71.9942	72.6228	72.122
1304	130.4	49.7746	72.122	71.9942	72.6228	72.122
1305	130.5	78.0547	72.122	71.9942	72.6228	72.122
1306	130.6	68.4119	72.122	71.9942	72.6228	72.122
1307	130.7	61.8447	72.122	71.9942	72.6228	72.122
1308	130.8	63.1	72.122	71.9942	72.6228	72.122
1309	130.9	156.087	142.135	142.047	152.311	146.082
1310	131	84.3638	72.122	71.9942	72.6228	72.122
1311	131.1	55.2531	72.122	71.9942	72.6228	72.122
1312	131.2	76.5087	72.122	71.9942	72.6228	72.122
1313	131.3	139.513	142.135	142.047	141.076	146.082
1314	131.4	163.083	142.135	142.047	141.076	146.082
1315	131.5	138.326	142.135	142.047	141.076	146.082
1316	131.6	145.465	142.135	142.047	141.076	146.082
1317	131.7	140.983	142.135	142.047	141.076	146.082
1318	131.8	137.165	142.135	142.047	141.076	146.082
1319	131.9	129.246	142.135	142.047	141.076	146.082
1320	132	137.776	142.135	142.047	141.076	146.082
1321	132.1	157.936	142.135	142.047	152.311	146.082
1322	132.2	144.29	142.135	142.047	152.311	146.082
1323	132.3	166.685	142.135	142.047	152.311	146.082
1324	132.4	167.022	142.135	142.047	152.311	146.082
1325	132.5	230.024	213.887	213.859	205.199	217.222
1326	132.6	203.908	213.887	213.859	205.199	217.222
1327	132.7	207.74	213.887	213.859	205.199	217.222
1328	132.8	193.004	213.887	213.859	205.199	217.222
1329	132.9	212.245	213.887	213.859	205.199	217.222
1330	133	210.391	213.887	213.859	205.199	217.222
1331	133.1	212.605	213.887	213.859	205.199	217.222
1332	133.2	208.967	213.887	213.859	205.199	217.222
1333	133.3	142.664	142.135	142.047	152.311	146.082
1334	133.4	163.303	142.135	142.047	152.311	146.082
1335	133.5	147.27	142.135	142.047	152.311	146.082
1336	133.6	137.874	142.135	142.047	152.311	146.082
1337	133.7	136.102	142.135	142.047	152.311	146.082
1338	133.8	158.784	142.135	142.047	152.311	146.082
1339	133.9	150.109	142.135	142.047	152.311	146.082
1340	134	153.925	142.135	142.047	152.311	146.082
1341	134.1	161.552	142.135	142.047	152.311	146.082
1342	134.2	169.942	142.135	142.047	152.311	146.082
1343	134.3	125.197	142.135	142.047	152.311	146.082
1344	134.4	159.181	142.135	142.047	152.311	146.082
1345	134.5	148.748	142.135	142.047	152.311	146.082
1346	134.6	141.464	142.135	142.047	152.311	146.082
1347	134.7	131.486	142.135	142.047	152.311	146.082
1348	134.8	133.404	142.135	142.047	152.311	146.082
1349	134.9	167.342	142.135	142.047	152.311	146.082
1350	135	134.334	142.135	142.047	152.311	146.082
1351	135.1	167.386	142.135	142.047	152.311	146.082
1352	135.2	141.174	142.135	142.047	152.311	146.082
1353	135.3	149.99	142.135	142.047	152.311	146.082
1354	135.4	148.767	142.135	142.047	152.311	146.082
1355	135.5	78.1467	72.122	71.9942	72.6228	72.122
1356	135.6	69.6637	72.122	71.9942	72.6228	72.122
1357	135.7	69.1568	72.122	71.9942	72.6228	72.122
1358	135.8	91.4897	72.122	71.9942	72.6228	72.122
1359	135.9	155.227	142.135	142.047	152.311	146.082
1360	136	145.523	142.135	142.047	152.311	146.082
1361	136.1	168.593	142.135	142.047	152.311	146.082
1362	136.2	161.224	142.135	142.047	152.311	146.082
1363	136.3	150.015	142.135	142.047	152.311	146.082
1364	136.4	155.608	142.135	142.047	152.311	146.082
1365	136.5	147.382	142.135	142.047	152.311	146.082
1366	136.6	152.062	142.135	142.047	152.311	146.082
1367	136.7	185.172	142.135	142.047	152.311	146.082
1368	136.8	166.047	142.135	142.047	152.311	146.082
1369	136.9	166.398	142.135	142.047	152.311	146.082
1370	137	157.405	142.135	142.047	152.311	146.082
1371	137.1	147.508	142.135	142.047	152.311	146.082
1372	137.2	142.526	142.135	142.047	152.311	146.082
1373	137.3	149.138	142.135	142.047	152.311	146.082
1374	137.4	178.297	142.135	142.047	152.311	146.082
1375	137.5	138.682	142.135	142.047	152.311	146.082
1376	137.6	150.311	142.135	142.047	152.311	146.082
1377	137.7	170.998	142.135	142.047	152.311	146.082
1378	137.8	148.517	142.135	142.047	152.311	146.082
1379	137.9	93.7887	72.122	71.9942	72.6228	72.122
1380	138	59.2292	72.122	71.9942	72.6228	72.122
1381	138.1	60.2365	72.122	71.9942	72.6228	72.122
1382	138.2	91.4639	72.122	71.9942	72.6228	72.122
1383	138.3	62.8644	72.122	71.9942	72.6228	72.122
1384	138.4	130.805	142.135	142.047	141.076	146.082
1385	138.5	141.388	142.135	142.047	141.076	146.082
1386	138.6	122.535	142.135	142.047	141.076	146.082
1387	138.7	147.381	142.135	142.047	141.076	146.082
1388	138.8	149.677	142.135	142.047	141.076	146.082
1389	138.9	140.206	142.135	142.047	141.076	146.082
1390	139	142.589	142.135	142.047	141.076	146.082
1391	139.1	155.334	142.135	142.047	141.076	146.082
1392	139.2	138.479	142.135	142.047	141.076	146.082
1393	139.3	125.638	142.135	142.047	141.076	146.082
1394	139.4	152.409	142.135	142.047	141.076	146.082
1395	139.5	123.81	142.135	142.047	141.076	146.082
1396	139.6	77.7312	72.122	71.9942	72.6228	72.122
1397	139.7	73.7108	72.122	71.9942	72.6228	72.122
1398	139.8	75.1739	72.122	71.9942	72.6228	72.122
1399	139.9	68.0305	72.122	71.9942	72.6228	72.122
1400	140	73.6642	72.122	71.9942	72.6228	72.122
1401	140.1	74.41	72.122	71.9942	72.6228	72.122
1402	140.2	60.9463	72.122	71.9942	72.6228	72.122
1403	140.3	78.8022	72.122	71.9942	72.6228	72.122
1404	140.4	44.7362	72.122	71.9942	72.6228	72.122
1405	140.5	50.5757	72.122	71.9942	72.6228	72.122
1406	140.6	63.5696	72.122	71.9942	72.6228	72.122
1407	140.7	78.5562	72.122	71.9942	72.6228	72.122
1408	140.8	90.8807	72.122	71.9942	72.6228	72.122
1409	140.9	96.4272	72.122	71.9942	72.6228	72.122
1410	141	97.1967	72.122	71.9942	72.6228	72.122
1411	141.1	77.0665	72.122	71.9942	72.6228	72.122
1412	141.2	62.5179	72.122	71.9942	72.6228	72.122
1413	141.3	66.0925	72.122	71.9942	72.6228	72.122
1414	141.4	58.1583	72.122	71.9942	72.6228	72.122
1415	141.5	43.6777	72.122	71.9942	72.6228	72.122
1416	141.6	64.3969	72.122	71.9942	72.6228	72.122
1417	141.7	81.2348	72.122	71.9942	72.6228	72.122
1418	141.8	82.4168	72.122	71.9942	72.6228	72.122
1419	141.9	61.9712	72.122	71.9942	72.6228	72.122
1420	142	65.3272	72.122	71.9942	72.6228	72.122
1421	142.1	61.1324	72.122	71.9942	72.6228	72.122
1422	142.2	79.8165	72.122	71.9942	72.6228	72.122
1423	142.3	122.657	142.135	142.047	141.076	146.082
1424	142.4	141.239	142.135	142.047	141.076	146.082
1425	142.5	146.704	142.135	142.047	141.076	146.082
1426	142.6	146.369	142.135	142.047	141.076	146.082
1427	142.7	151.65	142.135	142.047	141.076	146.082
1428	142.8	117.671	142.135	142.047	141.076	146.082
1429	142.9	150.815	142.135	142.047	141.076	146.082
1430	143	121.444	142.135	142.047	141.076	146.082
1431	143.1	154.245	142.135	142.047	141.076	146.082
1432	143.2	119.54	142.135	142.047	141.076	146.082
1433	143.3	157.143	142.135	142.047	141.076	146.082
1434	143.4	142.232	142.135	142.047	141.076	146.082
1435	143.5	165.983	142.135	142.047	141.076	146.082
1436	143.6	149.244	142.135	142.047	141.076	146.082
1437	143.7	142.445	142.135	142.047	141.076	146.082
1438	143.8	140.558	142.135	142.047	141.076	146.082
1439	143.9	144.395	142.135	142.047	141.076	146.082
1440	144	134.665	142.135	142.047	141.076	146.082
1441	144.1	150.896	142.135	142.047	141.076	146.082
1442	144.2	155.424	142.135	142.047	141.076	146.082
1443	144.3	155.201	142.135	142.047	141.076	146.082
1444	144.4	139.72	142.135	142.047	141.076	146.082
1445	144.5	132.368	142.135	142.047	141.076	146.082
1446	144.6	148.149	142.135	142.047	141.076	146.082
1447	144.7	135.565	142.135	142.047	141.076	146.082
1448	144.8	148.584	142.135	142.047	141.076	146.082
1449	144.9	122.866	142.135	142.047	141.076	146.082
1450	145	155.405	142.135	142.047	141.076	146.082
1451	145.1	130.85	142.135	142.047	141.076	146.082
1452	145.2	145.386	142.135	142.047	141.076	146.082
1453	145.3	170.574	142.135	142.047	141.076	146.082
1454	145.4	139.855	142.135	142.047	141.076	146.082
1455	145.5	139.128	142.135	142.047	141.076	146.082
1456	145.6	145.222	142.135	142.047	141.076	146.082
1457	145.7	109.407	142.135	142.047	141.076	146.082
1458	145.8	141.825	142.135	142.047	141.076	146.082
1459	145.9	141.259	142.135	142.047	141.076	146.082
1460	146	212.413	213.887	213.859	216.398	217.222
1461	146.1	223.244	213.887	213.859	216.398	217.222
1462	146.2	272.037	282.195	281.735	282.751	282.195
1463	146.3	319.054	282.195	281.735	282.751	282.195
1464	146.4	284.034	282.195	281.735	282.751	282.195
1465	146.5	305.5	282.195	281.735	282.751	282.195
1466	146.6	284.724	282.195	281.735	282.751	282.195
1467	146.7	222.709	213.887	213.859	282.751	217.222
1468	146.8	321.881	282.195	281.735	282.751	282.195
1469	146.9	274.848	282.195	281.735	282.751	282.195
1470	147	279.308	282.195	281.735	282.751	282.195
1471	147.1	195.75	213.887	213.859	216.398	217.222
1472	147.2	213.139	213.887	213.859	216.398	217.222
1473	147.3	209.281	213.887	213.859	216.398	217.222
1474	147.4	221.131	213.887	213.859	216.398	217.222
1475	147.5	226.542	213.887	213.859	216.398	217.222
1476	147.6	214.962	213.887	213.859	216.398	217.222
1477	147.7	208.449	213.887	213.859	216.398	217.222
1478	147.8	222.571	213.887	213.859	216.398	217.222
1479	147.9	226.013	213.887	213.859	216.398	217.222
1480	148	289.897	282.195	281.735	282.751	282.195
1481	148.1	285.763	282.195	281.735	282.751	282.195
1482	148.2	284.888	282.195	281.735	282.751	282.195
1483	148.3	299.404	282.195	281.735	282.751	282.195
1484	148.4	280.76	282.195	281.735	282.751	282.195
1485	148.5	301.566	282.195	281.735	282.751	282.195
1486	148.6	274.436	282.195	281.735	282.751	282.195
1487	148.7	284.387	282.195	281.735	282.751	282.195
1488	148.8	280.554	282.195	281.735	282.751	282.195
1489	148.9	290.723	282.195	281.735	282.751	282.195
1490	149	293.268	282.195	281.735	282.751	282.195
1491	149.1	309.781	282.195	281.735	282.751	282.195
1492	149.2	207.217	213.887	213.859	205.199	204.233
1493	149.3	209.929	213.887	213.859	205.199	204.233
1494	149.4	221.942	213.887	213.859	205.199	204.233
1495	149.5	204.131	213.887	213.859	205.199	204.233
1496	149.6	210.725	213.887	213.859	205.199	204.233
1497	149.7	201.481	213.887	213.859	205.199	204.233
1498	149.8	197.96	213.887	213.859	205.199	204.233
1499	149.9	217.885	213.887	213.859	205.199	204.233
1500	150	202.056	213.887	213.859	205.199	204.233
1501	150.1	184.001	213.887	213.859	205.199	204.233
1502	150.2	203.754	213.887	213.859	205.199	204.233
1503	150.3	194.395	213.887	213.859	205.199	204.233
1504	150.4	193.602	213.887	213.859	205.199	204.233
1505	150.5	187.648	213.887	213.859	205.199	204.233
1506	150.6	275.907	282.195	281.735	282.751	282.195
1507	150.7	268.95	282.195	281.735	282.751	282.195
1508	150.8	287.117	282.195	281.735	282.751	282.195
1509	150.9	205.082	213.887	213.859	216.398	217.222
1510	151	211.598	213.887	213.859	216.398	217.222
1511	151.1	211.768	213.887	213.859	216.398	217.222
1512	151.2	224.841	213.887	213.859	216.398	217.222
1513	151.3	227.483	213.887	213.859	216.398	217.222
1514	151.4	215.744	213.887	213.859	216.398	217.222
1515	151.5	200.137	213.887	213.859	216.398	217.222
1516	151.6	209.768	213.887	213.859	216.398	217.222
1517	151.7	206.585	213.887	213.859	216.398	217.222
1518	151.8	227.562	213.887	213.859	216.398	217.222
1519	151.9	194.459	213.887	213.859	216.398	217.222
1520	152	191.593	213.887	213.859	216.398	217.222
1521	152.1	216.924	213.887	213.859	216.398	217.222
1522	152.2	218.495	213.887	213.859	216.398	217.222
1523	152.3	210.494	213.887	213.859	216.398	217.222
1524	152.4	225.117	213.887	213.859	216.398	217.222
1525	152.5	215.397	213.887	213.859	216.398	217.222
1526	152.6	228.292	213.887	213.859	216.398	217.222
1527	152.7	201.613	213.887	213.859	216.398	217.222
1528	152.8	220.089	213.887	213.859	216.398	217.222
1529	152.9	151.363	142.135	142.047	141.076	146.082
1530	153	141.993	142.135	142.047	141.076	146.082
1531	153.1	132.569	142.135	142.047	141.076	146.082
1532	153.2	133.09	142.135	142.047	141.076	146.082
1533	153.3	140.078	142.135	142.047	141.076	146.082
1534	153.4	141.199	142.135	142.047	141.076	146.082
1535	153.5	223.747	213.887	213.859	216.398	217.222
1536	153.6	202.36	213.887	213.859	216.398	217.222
1537	153.7	216.33	213.887	213.859	216.398	217.222
1538	153.8	203.551	213.887	213.859	216.398	217.222
1539	153.9	202.081	213.887	213.859	216.398	217.222
1540	154	220.473	213.887	213.859	216.398	217.222
1541	154.1	216.642	213.887	213.859	216.398	217.222
1542	154.2	214.099	213.887	213.859	216.398	217.222
1543	154.3	207.977	213.887	213.859	216.398	217.222
1544	154.4	229.192	213.887	213.859	216.398	217.222
1545	154.5	199.186	213.887	213.859	216.398	217.222
1546	154.6	209.864	213.887	213.859	216.398	217.222
1547	154.7	210.755	213.887	213.859	216.398	217.222
1548	154.8	208.778	213.887	213.859	216.398	217.222
1549	154.9	207.991	213.887	213.859	216.398	217.222
1550	155	208.726	213.887	213.859	216.398	217.222
1551	155.1	231.766	213.887	213.859	216.398	217.222
1552	155.2	231.973	213.887	213.859	216.398	217.222
1553	155.3	210.893	213.887	213.859	216.398	217.222
1554	155.4	234.273	213.887	213.859	216.398	217.222
1555	155.5	226.411	213.887	213.859	216.398	217.222
1556	155.6	202.778	213.887	213.859	216.398	217.222
1557	155.7	212.972	213.887	213.859	216.398	217.222
1558	155.8	210.308	213.887	213.859	216.398	217.222
1559	155.9	207.985	213.887	213.859	216.398	217.222
1560	156	209.168	213.887	213.859	216.398	217.222
1561	156.1	191.046	213.887	213.859	216.398	217.222
1562	156.2	196.758	213.887	213.859	216.398	217.222
1563	156.3	197.02	213.887	213.859	216.398	217.222
1564	156.4	214.016	213.887	213.859	216.398	217.222
1565	156.5	206.897	213.887	213.859	216.398	217.222
1566	156.6	214.038	213.887	213.859	216.398	217.222
1567	156.7	221.932	213.887	213.859	216.398	217.222
1568	156.8	213.383	213.887	213.859	216.398	217.222
1569	156.9	232.4	213.887	213.859	216.398	217.222
1570	157	205.985	213.887	213.859	216.398	217.222
1571	157.1	229.05	213.887	213.859	216.398	217.222
1572	157.2	179.698	213.887	213.859	216.398	217.222
1573	157.3	206.565	213.887	213.859	216.398	217.222
1574	157.4	222.754	213.887	213.859	216.398	217.222
1575	157.5	211.193	213.887	213.859	216.398	217.222
1576	157.6	225.008	213.887	213.859	216.398	217.222
1577	157.7	224.072	213.887	213.859	216.398	217.222
1578	157.8	221.039	213.887	213.859	216.398	217.222
1579	157.9	221.608	213.887	213.859	216.398	217.222
1580	158	216.872	213.887	213.859	216.398	217.222
1581	158.1	213.185	213.887	213.859	216.398	217.222
1582	158.2	304.546	282.195	281.735	282.751	282.195
1583	158.3	286.663	282.195	281.735	282.751	282.195
1584	158.4	267.964	282.195	281.735	282.751	282.195
1585	158.5	285.664	282.195	281.735	282.751	282.195
1586	158.6	283.557	282.195	281.735	282.751	282.195
1587	158.7	278.391	282.195	281.735	282.751	282.195
1588	158.8	282.72	282.195	281.735	282.751	282.195
1589	158.9	188.575	213.887	213.859	205.199	204.233
1590	159	195.708	213.887	213.859	205.199	204.233
1591	159.1	184.461	213.887	213.859	205.199	204.233
1592	159.2	197.335	213.887	213.859	205.199	204.233
1593	159.3	199.198	213.887	213.859	205.199	204.233
1594	159.4	194.662	213.887	213.859	205.199	204.233
1595	159.5	217.481	213.887	213.859	205.199	204.233
1596	159.6	197.369	213.887	213.859	205.199	204.233
1597	159.7	214.038	213.887	213.859	205.199	204.233
1598	159.8	208.821	213.887	213.859	205.199	204.233
1599	159.9	197.073	213.887	213.859	205.199	204.233
1600	160	197.65	213.887	213.859	205.199	204.233
1601	160.1	192.752	213.887	213.859	205.199	204.233
1602	160.2	192.88	213.887	213.859	205.199	204.233
1603	160.3	183.851	213.887	213.859	205.199	204.233
1604	160.4	195.223	213.887	213.859	205.199	204.233
1605	160.5	193.183	213.887	213.859	205.199	204.233
1606	160.6	196.358	213.887	213.859	205.199	204.233
1607	160.7	195.466	213.887	213.859	205.199	204.233
1608	160.8	199.114	213.887	213.859	205.199	204.233
1609	160.9	150.099	142.135	142.047	141.076	133.617
1610	161	125.445	142.135	142.047	141.076	133.617
1611	161.1	151.999	142.135	142.047	141.076	133.617
1612	161.2	205.465	213.887	213.859	152.311	204.233
1613	161.3	153.998	142.135	142.047	152.311	133.617
1614	161.4	144.91	142.135	142.047	152.311	133.617
1615	161.5	140.901	142.135	142.047	152.311	133.617
1616	161.6	163.292	142.135	142.047	152.311	133.617
1617	161.7	143.956	142.135	142.047	141.076	133.617
1618	161.8	113.042	142.135	142.047	141.076	133.617
1619	161.9	146.404	142.135	142.047	141.076	133.617
1620	162	138.913	142.135	142.047	141.076	133.617
1621	162.1	155.007	142.135	142.047	141.076	133.617
1622	162.2	148.194	142.135	142.047	141.076	133.617
1623	162.3	105.541	142.135	142.047	141.076	133.617
1624	162.4	136.586	142.135	142.047	141.076	133.617
1625	162.5	129.964	142.135	142.047	141.076	133.617
1626	162.6	129.174	142.135	142.047	141.076	133.617
1627	162.7	155.711	142.135	142.047	141.076	133.617
1628	162.8	129.021	142.135	142.047	141.076	133.617
1629	162.9	141.134	142.135	142.047	141.076	133.617
1630	163	123.665	142.135	142.047	141.076	133.617
1631	163.1	144.071	142.135	142.047	141.076	133.617
1632	163.2	140.984	142.135	142.047	141.076	133.617
1633	163.3	147.537	142.135	142.047	141.076	133.617
1634	163.4	137.206	142.135	142.047	141.076	133.617
1635	163.5	162.042	142.135	142.047	141.076	133.617
1636	163.6	146.807	142.135	142.047	141.076	133.617
1637	163.7	154.245	142.135	142.047	141.076	133.617
1638	163.8	148.207	142.135	142.047	141.076	133.617
1639	163.9	130.34	142.135	142.047	141.076	133.617
1640	164	107.363	142.135	142.047	141.076	133.617
1641	164.1	122.673	142.135	142.047	141.076	133.617
1642	164.2	141.119	142.135	142.047	141.076	133.617
1643	164.3	156.525	142.135	142.047	141.076	133.617
1644	164.4	142.996	142.135	142.047	141.076	133.617
1645	164.5	145.269	142.135	142.047	141.076	133.617
1646	164.6	128.526	142.135	142.047	141.076	133.617
1647	164.7	129.372	142.135	142.047	141.076	133.617
1648	164.8	140.69	142.135	142.047	141.076	133.617
1649	164.9	127.352	142.135	142.047	141.076	133.617
1650	165	133.952	142.135	142.047	141.076	133.617
1651	165.1	155.226	142.135	142.047	141.076	133.617
1652	165.2	126.678	142.135	142.047	141.076	133.617
1653	165.3	140.479	142.135	142.047	141.076	133.617
1654	165.4	135.411	142.135	142.047	141.076	133.617
1655	165.5	137.407	142.135	142.047	141.076	133.617
1656	165.6	209.894	213.887	213.859	216.398	217.222
1657	165.7	222.605	213.887	213.859	216.398	217.222
1658	165.8	215.28	213.887	213.859	216.398	217.222
1659	165.9	198.047	213.887	213.859	216.398	217.222
1660	166	222.389	213.887	213.859	216.398	217.222
1661	166.1	154.28	142.135	142.047	141.076	146.082
1662	166.2	137.659	142.135	142.047	141.076	146.082
1663	166.3	134.243	142.135	142.047	141.076	146.082
1664	166.4	144.083	142.135	142.047	141.076	146.082
1665	166.5	213.155	213.887	213.859	205.199	204.233
1666	166.6	204.04	213.887	213.859	205.199	204.233
1667	166.7	187.333	213.887	213.859	205.199	204.233
1668	166.8	194.451	213.887	213.859	205.199	204.233
1669	166.9	209.271	213.887	213.859	205.199	204.233
1670	167	217.486	213.887	213.859	205.199	204.233
1671	167.1	205.505	213.887	213.859	205.199	204.233
1672	167.2	201.251	213.887	213.859	205.199	204.233
1673	167.3	192.53	213.887	213.859	205.199	204.233
1674	167.4	189.235	213.887	213.859	205.199	204.233
1675	167.5	210.007	213.887	213.859	205.199	204.233
1676	167.6	207.553	213.887	213.859	205.199	204.233
1677	167.7	202.774	213.887	213.859	205.199	204.233
1678	167.8	195.318	213.887	213.859	205.199	204.233
1679	167.9	197.298	213.887	213.859	205.199	204.233
1680	168	195.736	213.887	213.859	205.199	204.233
1681	168.1	214.041	213.887	213.859	216.398	204.233
1682	168.2	211.634	213.887	213.859	216.398	204.233
1683	168.3	250.937	282.195	281.735	282.751	282.195
1684	168.4	271.263	282.195	281.735	282.751	282.195
1685	168.5	256.134	282.195	281.735	282.751	282.195
1686	168.6	283.659	282.195	281.735	282.751	282.195
1687	168.7	285.954	282.195	281.735	282.751	282.195
1688	168.8	269.822	282.195	281.735	282.751	282.195
1689	168.9	287.655	282.195	281.735	282.751	282.195
1690	169	291.953	282.195	281.735	282.751	282.195
1691	169.1	280.747	282.195	281.735	282.751	282.195
1692	169.2	269.665	282.195	281.735	282.751	282.195
1693	169.3	276.721	282.195	281.735	282.751	282.195
1694	169.4	280.16	282.195	281.735	282.751	282.195
1695	169.5	268.624	282.195	281.735	282.751	282.195
1696	169.6	269.944	282.195	281.735	282.751	282.195
1697	169.7	271.426	282.195	281.735	282.751	282.195
1698	169.8	283.198	282.195	281.735	282.751	282.195
1699	169.9	268.235	282.195	281.735	282.751	282.195
1700	170	264.494	282.195	281.735	282.751	282.195
1701	170.1	274.46	282.195	281.735	282.751	282.195
1702	170.2	260.816	282.195	281.735	282.751	282.195
1703	170.3	279.501	282.195	281.735	282.751	282.195
1704	170.4	286.698	282.195	281.735	282.751	282.195
1705	170.5	276.134	282.195	281.735	282.751	282.195
1706	170.6	281.55	282.195	281.735	282.751	282.195
1707	170.7	269.529	282.195	281.735	282.751	282.195
1708	170.8	275.788	282.195	281.735	282.751	282.195
1709	170.9	232.345	213.887	213.859	216.398	217.222
1710	171	229.092	213.887	213.859	216.398	217.222
1711	171.1	193.503	213.887	213.859	216.398	217.222
1712	171.2	192.588	213.887	213.859	216.398	217.222
1713	171.3	202.891	213.887	213.859	216.398	217.222
1714	171.4	201.641	213.887	213.859	216.398	217.222
1715	171.5	225.026	213.887	213.859	216.398	217.222
1716	171.6	217.397	213.887	213.859	216.398	217.222
1717	171.7	218.991	213.887	213.859	216.398	217.222
1718	171.8	284.018	282.195	281.735	216.398	282.195
1719	171.9	202.302	213.887	213.859	216.398	217.222
1720	172	206.67	213.887	213.859	216.398	217.222
1721	172.1	219.007	213.887	213.859	216.398	217.222
1722	172.2	231.321	213.887	213.859	216.398	217.222
1723	172.3	216.509	213.887	213.859	216.398	217.222
1724	172.4	214.417	213.887	213.859	216.398	217.222
1725	172.5	204.99	213.887	213.859	216.398	217.222
1726	172.6	236.44	213.887	213.859	216.398	217.222
1727	172.7	155.137	142.135	142.047	141.076	146.082
1728	172.8	147.508	142.135	142.047	141.076	146.082
1729	172.9	151.527	142.135	142.047	141.076	146.082
1730	173	126.027	142.135	142.047	141.076	146.082
1731	173.1	144.749	142.135	142.047	141.076	146.082
1732	173.2	142.486	142.135	142.047	141.076	146.082
1733	173.3	150.612	142.135	142.047	141.076	146.082
1734	173.4	138.907	142.135	142.047	141.076	146.082
1735	173.5	138.009	142.135	142.047	141.076	146.082
1736	173.6	145.912	142.135	142.047	141.076	146.082
1737	173.7	144.848	142.135	142.047	141.076	146.082
1738	173.8	129.717	142.135	142.047	141.076	146.082
1739	173.9	111.485	142.135	142.047	141.076	146.082
1740	174	132.63	142.135	142.047	141.076	146.082
1741	174.1	139.8	142.135	142.047	141.076	146.082
1742	174.2	153.226	142.135	142.047	141.076	146.082
1743	174.3	158.249	142.135	142.047	141.076	146.082
1744	174.4	148.96	142.135	142.047	141.076	146.082
1745	174.5	127.007	142.135	142.047	141.076	146.082
1746	174.6	147.147	142.135	142.047	141.076	146.082
1747	174.7	130.063	142.135	142.047	141.076	146.082
1748	174.8	160.067	142.135	142.047	141.076	146.082
1749	174.9	163.485	142.135	142.047	141.076	146.082
1750	175	147.497	142.135	142.047	141.076	146.082
1751	175.1	123.681	142.135	142.047	141.076	146.082
1752	175.2	140.29	142.135	142.047	141.076	146.082
1753	175.3	217.072	213.887	213.859	216.398	217.222
1754	175.4	210.8	213.887	213.859	216.398	217.222
1755	175.5	121.758	142.135	142.047	130.248	133.617
1756	175.6	120.554	142.135	142.047	130.248	133.617
1757	175.7	127.086	142.135	142.047	130.248	133.617
1758	175.8	235.433	213.887	213.859	205.199	204.233
1759	175.9	218.077	213.887	213.859	205.199	204.233
1760	176	210.775	213.887	213.859	205.199	204.233
1761	176.1	214.801	213.887	213.859	205.199	204.233
1762	176.2	200.384	213.887	213.859	205.199	204.233
1763	176.3	194.479	213.887	213.859	205.199	204.233
1764	176.4	216.435	213.887	213.859	205.199	204.233
1765	176.5	195.933	213.887	213.859	205.199	204.233
1766	176.6	215.773	213.887	213.859	205.199	204.233
1767	176.7	221.572	213.887	213.859	205.199	204.233
1768	176.8	214.335	213.887	213.859	205.199	204.233
1769	176.9	192.286	213.887	213.859	205.199	204.233
1770	177	207.025	213.887	213.859	205.199	204.233
1771	177.1	214.143	213.887	213.859	205.199	204.233
1772	177.2	217.301	213.887	213.859	205.199	204.233
1773	177.3	207.062	213.887	213.859	205.199	204.233
1774	177.4	198.664	213.887	213.859	205.199	204.233
1775	177.5	214.369	213.887	213.859	205.199	204.233
1776	177.6	196.113	213.887	213.859	205.199	204.233
1777	177.7	205.809	213.887	213.859	205.199	204.233
1778	177.8	188.219	213.887	213.859	205.199	204.233
1779	177.9	194.788	213.887	213.859	205.199	204.233
1780	178	211.993	213.887	213.859	205.199	204.233
1781	178.1	223.953	213.887	213.859	205.199	204.233
1782	178.2	206.045	213.887	213.859	205.199	204.233
1783	178.3	209.314	213.887	213.859	205.199	204.233
1784	178.4	201.944	213.887	213.859	205.199	204.233
1785	178.5	200.879	213.887	213.859	205.199	204.233
1786	178.6	200.534	213.887	213.859	205.199	204.233
1787	178.7	147.256	142.135	142.047	130.248	133.617
1788	178.8	127.491	142.135	142.047	130.248	133.617
1789	178.9	120.899	142.135	142.047	130.248	133.617
1790	179	131.113	142.135	142.047	130.248	133.617
1791	179.1	133.053	142.135	142.047	130.248	133.617
1792	179.2	133.554	142.135	142.047	130.248	133.617
1793	179.3	112.512	142.135	142.047	130.248	133.617
1794	179.4	149.788	142.135	142.047	130.248	133.617
1795	179.5	115.121	142.135	142.047	130.248	133.617
1796	179.6	125.103	142.135	142.047	130.248	133.617
1797	179.7	121.157	142.135	142.047	130.248	133.617
1798	179.8	158.169	142.135	142.047	130.248	133.617
1799	179.9	145.018	142.135	142.047	130.248	133.617
1800	180	137.042	142.135	142.047	130.248	133.617
1801	180.1	147.739	142.135	142.047	130.248	133.617
1802	180.2	131.369	142.135	142.047	130.248	133.617
1803	180.3	198.488	213.887	213.859	205.199	204.233
1804	180.4	226.896	213.887	213.859	205.199	204.233
1805	180.5	205.248	213.887	213.859	205.199	204.233
1806	180.6	212.139	213.887	213.859	205.199	204.233
1807	180.7	220.012	213.887	213.859	205.199	204.233
1808	180.8	191.531	213.887	213.859	205.199	204.233
1809	180.9	208.243	213.887	213.859	205.199	204.233
1810	181	210.978	213.887	213.859	205.199	204.233
1811	181.1	135.198	142.135	142.047	141.076	133.617
1812	181.2	132.077	142.135	142.047	141.076	133.617
1813	181.3	140.75	142.135	142.047	141.076	133.617
1814	181.4	144.566	142.135	142.047	141.076	133.617
1815	181.5	137.532	142.135	142.047	141.076	133.617
1816	181.6	143.75	142.135	142.047	141.076	133.617
1817	181.7	121.926	142.135	142.047	141.076	133.617
1818	181.8	131.585	142.135	142.047	141.076	133.617
1819	181.9	144.558	142.135	142.047	141.076	133.617
1820	182	146.07	142.135	142.047	141.076	133.617
1821	182.1	142.472	142.135	142.047	141.076	133.617
1822	182.2	119.034	142.135	142.047	141.076	133.617
1823	182.3	151.66	142.135	142.047	141.076	133.617
1824	182.4	143.229	142.135	142.047	141.076	133.617
1825	182.5	117.186	142.135	142.047	141.076	133.617
1826	182.6	138.411	142.135	142.047	141.076	133.617
1827	182.7	225.086	213.887	213.859	229.628	217.222
1828	182.8	226.133	213.887	213.859	229.628	217.222
1829	182.9	240.08	213.887	213.859	229.628	217.222
1830	183	229.222	213.887	213.859	229.628	217.222
1831	183.1	224.202	213.887	213.859	229.628	217.222
1832	183.2	227.137	213.887	213.859	229.628	217.222
1833	183.3	151.613	142.135	142.047	152.311	146.082
1834	183.4	150.907	142.135	142.047	152.311	146.082
1835	183.5	145.151	142.135	142.047	152.311	146.082
1836	183.6	80.6542	72.122	71.9942	72.6228	72.122
1837	183.7	78.0642	72.122	71.9942	72.6228	72.122
1838	183.8	81.7347	72.122	71.9942	72.6228	72.122
1839	183.9	46.3083	72.122	71.9942	72.6228	72.122
1840	184	63.4526	72.122	71.9942	72.6228	72.122
1841	184.1	140.276	142.135	142.047	130.248	146.082
1842	184.2	151.661	142.135	142.047	130.248	146.082
1843	184.3	133.188	142.135	142.047	130.248	146.082
1844	184.4	108.833	72.122	142.047	130.248	72.122
1845	184.5	74.6408	72.122	71.9942	72.6228	72.122
1846	184.6	69.6755	72.122	71.9942	72.6228	72.122
1847	184.7	81.0034	72.122	71.9942	72.6228	72.122
1848	184.8	74.5935	72.122	71.9942	72.6228	72.122
1849	184.9	70.7247	72.122	71.9942	72.6228	72.122
1850	185	84.2249	72.122	71.9942	72.6228	72.122
1851	185.1	75.8178	72.122	71.9942	72.6228	72.122
1852	185.2	79.2402	72.122	71.9942	72.6228	72.122
1853	185.3	62.0178	72.122	71.9942	72.6228	72.122
1854	185.4	53.0392	72.122	71.9942	72.6228	72.122
1855	185.5	75.1823	72.122	71.9942	72.6228	72.122
1856	185.6	58.4697	72.122	71.9942	72.6228	72.122
1857	185.7	76.2663	72.122	71.9942	72.6228	72.122
1858	185.8	61.8561	72.122	71.9942	72.6228	72.122
1859	185.9	99.7705	72.122	71.9942	72.6228	72.122
1860	186	68.355	72.122	71.9942	72.6228	72.122
1861	186.1	70.2314	72.122	71.9942	72.6228	72.122
1862	186.2	71.0037	72.122	71.9942	72.6228	72.122
1863	186.3	65.5344	72.122	71.9942	72.6228	72.122
1864	186.4	47.3197	72.122	71.9942	72.6228	72.122
1865	186.5	80.7216	72.122	71.9942	72.6228	72.122
1866	186.6	89.1153	72.122	71.9942	72.6228	72.122
1867	186.7	57.4788	72.122	71.9942	72.6228	72.122
1868	186.8	67.1915	72.122	71.9942	72.6228	72.122
1869	186.9	146.651	142.135	142.047	141.076	146.082
1870	187	128.445	142.135	142.047	141.076	146.082
1871	187.1	142.08	142.135	142.047	141.076	146.082
1872	187.2	214.407	213.887	213.859	216.398	217.222
1873	187.3	218.823	213.887	213.859	216.398	217.222
1874	187.4	228.262	213.887	213.859	216.398	217.222
1875	187.5	227.278	213.887	213.859	216.398	217.222
1876	187.6	202.918	213.887	213.859	216.398	217.222
1877	187.7	219.028	213.887	213.859	216.398	217.222
1878	187.8	212.16	213.887	213.859	216.398	217.222
1879	187.9	208.567	213.887	213.859	216.398	217.222
1880	188	212.074	213.887	213.859	216.398	217.222
1881	188.1	206.352	213.887	213.859	216.398	217.222
1882	188.2	131.948	142.135	142.047	141.076	146.082
1883	188.3	141.925	142.135	142.047	141.076	146.082
1884	188.4	160.234	142.135	142.047	141.076	146.082
1885	188.5	141.311	142.135	142.047	141.076	146.082
1886	188.6	159.242	142.135	142.047	141.076	146.082
1887	188.7	131.492	142.135	142.047	141.076	146.082
1888	188.8	229.578	213.887	213.859	229.628	217.222
1889	188.9	245.59	213.887	213.859	229.628	217.222
1890	189	228.568	213.887	213.859	229.628	217.222
1891	189.1	218.294	213.887	213.859	229.628	217.222
1892	189.2	219.983	213.887	213.859	229.628	217.222
1893	189.3	280.16	282.195	281.735	282.751	282.195
1894	189.4	273.13	282.195	281.735	282.751	282.195
1895	189.5	263.377	282.195	281.735	282.751	282.195
1896	189.6	280.403	282.195	281.735	282.751	282.195
1897	189.7	292.267	282.195	281.735	282.751	282.195
1898	189.8	280.829	282.195	281.735	282.751	282.195
1899	189.9	315.958	282.195	281.735	282.751	282.195
1900	190	201.965	213.887	213.859	216.398	217.222
1901	190.1	222.252	213.887	213.859	216.398	217.222
1902	190.2	227.165	213.887	213.859	216.398	217.222
1903	190.3	201.346	213.887	213.859	216.398	217.222
1904	190.4	226.583	213.887	213.859	216.398	217.222
1905	190.5	215.569	213.887	213.859	216.398	217.222
1906	190.6	235.218	213.887	213.859	216.398	217.222
1907	190.7	219.025	213.887	213.859	216.398	217.222
1908	190.8	127.672	142.135	142.047	141.076	146.082
1909	190.9	133.191	142.135	142.047	141.076	146.082
1910	191	153.138	142.135	142.047	141.076	146.082
1911	191.1	151.965	142.135	142.047	141.076	146.082
1912	191.2	124.374	142.135	142.047	141.076	146.082
1913	191.3	151.966	142.135	142.047	141.076	146.082
1914	191.4	211.66	213.887	213.859	229.628	217.222
1915	191.5	227.224	213.887	213.859	229.628	217.222
1916	191.6	207.425	213.887	213.859	229.628	217.222
1917	191.7	232.862	213.887	213.859	229.628	217.222
1918	191.8	233.537	213.887	213.859	229.628	217.222
1919	191.9	232.681	213.887	213.859	229.628	217.222
1920	192	222.676	213.887	213.859	229.628	217.222
1921	192.1	196.483	213.887	213.859	229.628	217.222
1922	192.2	231.877	213.887	213.859	229.628	217.222
1923	192.3	221.92	213.887	213.859	229.628	217.222
1924	192.4	214.755	213.887	213.859	229.628	217.222
1925	192.5	221.972	213.887	213.859	229.628	217.222
1926	192.6	245.944	213.887	213.859	229.628	217.222
1927	192.7	228.877	213.887	213.859	229.628	217.222
1928	192.8	217.734	213.887	213.859	229.628	217.222
1929	192.9	236.449	213.887	213.859	229.628	217.222
1930	193	231.876	213.887	213.859	229.628	217.222
1931	193.1	236.398	213.887	213.859	229.628	217.222
1932	193.2	221.146	213.887	213.859	229.628	217.222
1933	193.3	222.16	213.887	213.859	229.628	217.222
1934	193.4	226.41	213.887	213.859	229.628	217.222
1935	193.5	218.455	213.887	213.859	229.628	217.222
1936	193.6	235.676	213.887	213.859	229.628	217.222
1937	193.7	249.675	213.887	213.859	229.628	217.222
1938	193.8	224.593	213.887	213.859	229.628	217.222
1939	193.9	214.939	213.887	213.859	229.628	217.222
1940	194	218.516	213.887	213.859	229.628	217.222
1941	194.1	228.949	213.887	213.859	229.628	217.222
1942	194.2	216.349	213.887	213.859	229.628	217.222
1943	194.3	228.072	213.887	213.859	229.628	217.222
1944	194.4	224.552	213.887	213.859	229.628	217.222
1945	194.5	230.315	213.887	213.859	229.628	217.222
1946	194.6	233.274	213.887	213.859	229.628	217.222
1947	194.7	216.11	213.887	213.859	229.628	217.222
1948	194.8	219.845	213.887	213.859	229.628	217.222
1949	194.9	220.91	213.887	213.859	229.628	217.222
1950	195	233.758	213.887	213.859	229.628	217.222
1951	195.1	227.439	213.887	213.859	229.628	217.222
1952	195.2	132.441	142.135	142.047	130.248	133.617
1953	195.3	136.246	142.135	142.047	130.248	133.617
1954	195.4	190.993	213.887	213.859	216.398	217.222
1955	195.5	229.039	213.887	213.859	216.398	217.222
1956	195.6	225.25	213.887	213.859	216.398	217.222
1957	195.7	218.19	213.887	213.859	216.398	217.222
1958	195.8	202.699	213.887	213.859	216.398	217.222
1959	195.9	221.959	213.887	213.859	216.398	217.222
1960	196	218.513	213.887	213.859	216.398	217.222
1961	196.1	212.186	213.887	213.859	216.398	217.222
1962	196.2	130.345	142.135	142.047	141.076	146.082
1963	196.3	144.685	142.135	142.047	141.076	146.082
1964	196.4	145.957	142.135	142.047	141.076	146.082
1965	196.5	146.521	142.135	142.047	141.076	146.082
1966	196.6	153.967	142.135	142.047	141.076	146.082
1967	196.7	129.904	142.135	142.047	141.076	146.082
1968	196.8	159	142.135	142.047	141.076	146.082
1969	196.9	132.569	142.135	142.047	141.076	146.082
1970	197	129.99	142.135	142.047	141.076	146.082
1971	197.1	154.677	142.135	142.047	141.076	146.082
1972	197.2	132.654	142.135	142.047	141.076	146.082
1973	197.3	170.956	142.135	142.047	141.076	146.082
1974	197.4	154.826	142.135	142.047	141.076	146.082
1975	197.5	146.824	142.135	142.047	141.076	146.082
1976	197.6	136.617	142.135	142.047	141.076	146.082
1977	197.7	143.233	142.135	142.047	141.076	146.082
1978	197.8	145.044	142.135	142.047	141.076	146.082
1979	197.9	143.945	142.135	142.047	141.076	146.082
1980	198	139.072	142.135	142.047	141.076	146.082
1981	198.1	157.856	142.135	142.047	141.076	146.082
1982	198.2	149.548	142.135	142.047	141.076	146.082
1983	198.3	150.755	142.135	142.047	141.076	146.082
1984	198.4	161.549	142.135	142.047	141.076	146.082
1985	198.5	131.244	142.135	142.047	141.076	146.082
1986	198.6	128.612	142.135	142.047	141.076	146.082
1987	198.7	139.499	142.135	142.047	141.076	146.082
1988	198.8	141.686	142.135	142.047	141.076	146.082
1989	198.9	139.678	142.135	142.047	141.076	146.082
1990	199	144.194	142.135	142.047	141.076	146.082
1991	199.1	158.408	142.135	142.047	141.076	146.082
1992	199.2	134.641	142.135	142.047	141.076	146.082
1993	199.3	152.298	142.135	142.047	141.076	146.082
1994	199.4	139.444	142.135	142.047	141.076	146.082
1995	199.5	136.353	142.135	142.047	141.076	146.082
1996	199.6	137.126	142.135	142.047	141.076	146.082
1997	199.7	150.378	142.135	142.047	141.076	146.082
1998	199.8	134.523	142.135	142.047	141.076	146.082
1999	199.9	153.652	142.135	142.047	141.076	146.082
[truncated: 1 more rows]

## Sheet: Figure 3-figure supplement 1
A-Example Trajectory					B-Intensity Separtion		C-SNR		D-Unbound Event Heterogeneity		E-Bound Event Heterogeneity
Frame	Time (s)	Intensity (au)	Idealized		71.1627		4.3301		0.747137		1.58773
1	0.1	492.571	487.309		77.8244		4.81516		2.49233		-0.355141
2	0.2	464.619	487.309		148.299		7.81148		0.402183		3.41726
3	0.3	421	487.309		47.3636		3.12106		2.23792		-2.3158
4	0.4	443.714	487.309		117.117		4.02497		1.49711		-4.62553
5	0.5	480.095	487.309		117.104		6.58629		1.15412		-2.49758
6	0.6	430.952	487.309		90.5775		4.59443		0.671944		3.753
7	0.7	450.762	487.309		94.5978		4.64897		-2.36574		5.79287
8	0.8	413.81	487.309		97.7325		4.90072		6.98784		5.2121
9	0.9	423.333	487.309		92.3375		4.85834		0.13075		-0.556382
10	1	407	487.309		100.452		5.32787		3.11466		1.63422
11	1.1	403.81	487.309		94.2712		4.898		1.88054		-1.78852
12	1.2	469.238	487.309		245.441		13.3922		3.57051		-1.32702
13	1.3	450.857	487.309		209.826		10.1196		4.12013		0.783344
14	1.4	445.952	487.309		168.142		8.31		1.62406		-0.111806
15	1.5	439.381	487.309		104.56		5.25047		3.69016		-1.17319
16	1.6	439.143	487.309		138.837		7.41671		0.941017		-1.26065
17	1.7	452.952	487.309		112.885		6.28127		2.63704		-2.0615
18	1.8	473.952	487.309		68.5282		4.74451		1.93663		-0.291809
19	1.9	440.905	487.309		135.186		7.64546		1.36134		-5.20492
20	2	448.429	487.309		252.525		12.8498		1.65247		-4.16637
21	2.1	442.19	487.309		129.936		4.64251		1.09457		-2.52492
22	2.2	467.048	487.309		123.289		6.50761		3.42021		2.53648
23	2.3	454.905	487.309		53.5812		2.66287		-0.906413		0.0676313
24	2.4	434.095	487.309		154.679		8.74699		0.0839045		-4.84035
25	2.5	420.238	487.309		111.245		5.98899		1.11706		-5.69664
26	2.6	462.333	487.309		150.984		8.55415		-2.32195		-3.64063
27	2.7	411.857	487.309		71.5207		3.86932		-4.11821		0.436355
28	2.8	473.143	487.309		141.884		8.36834		2.45892		0.915774
29	2.9	454.714	487.309		168.076		8.83675		-2.02872		0.146388
30	3	507.381	487.309		62.9064		3.31868		-1.9189		3.24982
31	3.1	475.381	487.309		201.522		11.5873		-1.76112		3.82541
32	3.2	445.667	487.309		145.552		7.7449		-0.635068		1.06199
33	3.3	320.048	333.18		118.736		6.70996		-1.4164		-6.75598
34	3.4	346.952	333.18		136.713		7.88515		-0.472632		-0.712302
35	3.5	299.143	333.18		65.5		4.25879		-1.37685		-2.63837
36	3.6	333.238	333.18		86.1715		4.76456		-1.55361		-1.05301
37	3.7	311	333.18		87.2123		5.04789		-1.3648		-2.2218
38	3.8	326.857	333.18		53.7714		3.7437		-0.571818		4.59227
39	3.9	455.286	487.309		42.5683		2.75464		-1.101		-4.26824
40	4	461.619	487.309		119.284		6.52135		-2.73248		-3.99819
41	4.1	452.619	487.309		168.767		7.18987		0.0472489		4.49726
42	4.2	483.19	487.309		245.138		13.0249		-0.372638		1.34138
43	4.3	416.286	487.309		81.4669		5.45781		-1.13533		5.70577
44	4.4	468.143	487.309		194.393		10.0989		1.88428		-0.754552
45	4.5	433.714	487.309		65.3174		3.8027		-0.552716		3.20696
46	4.6	422.333	487.309		123.381		7.59819		-1.71077		-2.1995
47	4.7	427.619	487.309		153.769		8.82403		0.256003		0.540371
48	4.8	397.333	487.309		75.5816		4.49525		3.89444		-10.548
49	4.9	458.762	487.309		145.8		7.39523		5.09659		-15.399
50	5	470.619	487.309		59.8357		3.64993		3.17174		-0.519572
51	5.1	450.381	487.309		266.925		15.2407		3.68501		2.87861
52	5.2	490.619	487.309		291.738		13.1286		5.04041		-4.87366
53	5.3	462.571	487.309		162.801		7.50605		0.420439		-3.0515
54	5.4	454.333	487.309		121.398		6.89958		3.97885		1.6831
55	5.5	475.238	487.309		106.587		5.51114		3.32978		-0.547778
56	5.6	500.429	487.309		93.0726		4.52231		1.94608		-4.71762
57	5.7	454.857	487.309		400.633		17.2779		1.86476		-3.03899
58	5.8	461.476	487.309		128.394		6.30987		2.25161		-0.268906
59	5.9	464.524	487.309		60.6831		4.44128		-0.777447		0.715191
60	6	442.952	487.309		135.114		10.5138		-0.710894		1.61264
61	6.1	488.762	487.309		33.2397		2.60305		-2.69307		4.55822
62	6.2	444.381	487.309		61.6861		5.19696		1.19806		-6.55147
63	6.3	466.476	487.309		61.3519		4.75241		-0.108384		-1.64406
64	6.4	416.571	487.309		158.584		11.4396		-1.83878		3.52607
65	6.5	538.286	487.309		83.9608		6.27592		-2.29064		-0.837748
66	6.6	486.81	487.309		80.3828		6.31562		-1.37198		-7.91606
67	6.7	441.952	487.309		54.0571		4.17851		-0.985152		-12.2453
68	6.8	437.81	487.309		86.6006		6.45678		-0.339871		-5.15055
69	6.9	449.429	487.309		119.698		9.59209		-2.23579		-5.40136
70	7	532.095	487.309		245.316		17.4639		-2.16261		0.392818
71	7.1	499.857	487.309		142.027		7.8514		0.105307		-3.45073
72	7.2	484.19	487.309		250.232		17.994		1.50302		2.46979
73	7.3	536.619	487.309		60.626		4.46014		0.580099		31.2208
74	7.4	501.095	487.309		150.995		11.3139		-0.787208		-9.77303
75	7.5	486.905	487.309		92.8681		7.10048		0.414568		-6.452
76	7.6	479.143	487.309		75.9261		5.92246		4.35225		10.8105
77	7.7	491	487.309		89.6228		6.14798		3.34984		16.9694
78	7.8	560.286	487.309		112.46		8.58033		5.90753		1.67314
79	7.9	468.048	487.309		91.3699		6.36333		2.4706		10.9091
80	8	465.381	487.309		166.768		12.2222		0.927492		-9.73102
81	8.1	509.381	487.309		68.0709		5.1494		1.62831		-6.83855
82	8.2	468	487.309		103.979		7.35286		1.77849		1.77494
83	8.3	531.571	487.309		126.271		9.60663		-0.433699		-3.73657
84	8.4	505.476	487.309		137.718		9.72809		0.0650202		3.81525
85	8.5	504.238	487.309		73.4389		5.5809		0.524323		-2.4682
86	8.6	504.286	487.309		80.2884		6.01893		0.691815		-5.67198
87	8.7	509.714	487.309		101.581		6.97597		1.08263		-6.80584
88	8.8	495.905	487.309		138.189		10.143		-1.01223		0.527951
89	8.9	467.619	487.309		69.4692		5.30013		-0.417075		3.67247
90	9	472.429	487.309		97.1275		7.44443		0.12744		-4.25849
91	9.1	334.762	333.18		126.496		9.61258		1.42247		0.135521
92	9.2	304.143	333.18		42.0342		3.04827		0.174774		-3.11782
93	9.3	320.333	333.18		174.714		12.1107		1.88975		-6.88521
94	9.4	347.952	333.18		47.4158		3.67531		-1.0893		5.20672
95	9.5	347.619	333.18		43.1858		3.39557		1.0603		4.30717
96	9.6	326.095	333.18		55.5269		4.02846		-0.0203903		4.92849
97	9.7	319.286	333.18		193.869		13.7302		-1.57035		4.17188
98	9.8	341.952	333.18		110.596		8.21439		-0.919574		6.35754
99	9.9	317.333	333.18		99.1038		7.76786		-2.66198		2.29224
100	10	329.619	333.18		143.872		10.4339		-0.713662		4.00183
101	10.1	514.286	487.309		117.547		8.036		-2.87597		0.290633
102	10.2	463.19	487.309		108.168		7.68606		2.38017		2.96433
103	10.3	507.286	487.309		62.5963		4.78534		4.64881		-3.39808
104	10.4	519.571	487.309		149.382		10.9852		5.17731		-5.85458
105	10.5	531.571	487.309		97.7101		7.57127		3.56715		-5.67966
106	10.6	485.286	487.309		152.524		11.493		4.07709		-5.08006
107	10.7	462.952	487.309		218.508		17.3952		1.16199		-6.8887
108	10.8	493.952	487.309		75.3088		5.52241		4.31807		-2.79699
109	10.9	536.905	487.309		67.4154		5.25639		2.29743		-3.55932
110	11	483.524	487.309		93.0737		6.99427		3.43497		-1.94523
111	11.1	477.333	487.309		118.206		8.70195		3.312		-0.417638
112	11.2	455.19	487.309		217.934		16.6048		1.73308		-0.921569
113	11.3	498.667	487.309		57.3192		4.46545		4.52885		-0.371961
114	11.4	471.905	487.309		147.953		10.8365		1.08788		-8.4277
115	11.5	495.952	487.309		69.0987		5.27543		-0.856097		-3.37089
116	11.6	515.286	487.309		121.915		9.42729		-1.39778		-7.49047
117	11.7	521.381	487.309		131.511		9.84666		0.341583		4.00997
118	11.8	520	487.309		33.4366		2.67469		-1.02909		3.75016
119	11.9	320	333.18		131.089		9.25986		-2.03892		-6.17712
120	12	335.952	333.18		101.642		7.10187		-4.66017		30.1156
121	12.1	376.524	333.18		120.175		8.74373		-0.876002		-9.24883
122	12.2	478.333	487.309		59.9837		4.5535		-4.08008		1.63164
123	12.3	477.857	487.309		187.538		10.6328		-2.34176		9.86871
124	12.4	542.143	487.309		92.7621		6.86003		-3.47869		9.41369
125	12.5	499.81	487.309		89.2389		6.64128		-4.15253		4.9837
126	12.6	501.571	487.309		113.255		8.05002		-1.05223		-1.19085
127	12.7	459.714	487.309		145.471		11.2134		-2.26372		0.196044
128	12.8	346	333.18		74.5324		5.58137		-2.77913		-3.39984
129	12.9	325.619	333.18		136.05		10.4704		-2.29247		-2.45369
130	13	341.476	333.18		65.4503		4.84503		-4.37324		0.243363
131	13.1	528.714	487.309		32.0884		2.35549		-2.58844		-2.25196
132	13.2	521.381	487.309		92.0411		6.66501		4.02281		-2.50378
133	13.3	492.095	487.309		110.007		7.81751		4.57162		-8.65039
134	13.4	526.667	487.309		154.941		10.6023		5.19529		-3.34354
135	13.5	527.333	487.309		115.984		8.91912		4.68997		-4.1645
136	13.6	403.619	487.309		112.485		8.58811		4.42563		-2.38526
137	13.7	340.143	333.18		144.986		10.411		3.89409		-0.779856
138	13.8	313.667	333.18		74.1641		5.35277		3.62679		-2.13993
139	13.9	327.19	333.18		107.921		7.78882		4.83764		1.81852
140	14	308.095	333.18		58.2192		4.5134		4.15012		-1.73506
141	14.1	325.286	333.18		148.308		10.9115		2.43543		-2.14571
142	14.2	337.381	333.18		58.5783		4.66297		2.0819		-1.61363
143	14.3	337.857	333.18		111.062		8.39046		0.854954		8.86798
144	14.4	314.762	333.18		78.5472		5.92716		0.0767362		-0.860429
145	14.5	472.238	487.309		129.388		10.0716		-0.658247		-1.02844
146	14.6	533.429	487.309		49.2549		3.60686		2.37389		-1.38766
147	14.7	525.619	487.309		140.194		10.4566		-0.453565		-3.78458
148	14.8	571.762	487.309		72.05		5.13276		-0.565264		-1.32774
149	14.9	539.714	487.309		51.3007		3.63791		4.24393		-1.24556
150	15	335.333	333.18		68.7621		5.22983		-1.44389		-0.874637
151	15.1	336.857	333.18		68.506		5.31587		-1.08179		4.1406
152	15.2	339.143	333.18		92.1277		6.84718		0.0225123		15.9251
153	15.3	324.905	333.18		117.036		6.92881		0.523962		-4.1532
154	15.4	323.571	333.18		74.0828		5.86434		-2.36241		4.49526
155	15.5	329.286	333.18		50.1706		3.88444		1.55546		0.643711
156	15.6	316.81	333.18		73.7608		5.03657		-2.66519		-1.1872
157	15.7	334.476	333.18		108.626		7.60456		-0.120789		7.84666
158	15.8	352.476	333.18		172.838		9.22996		-1.45504		-2.83308
159	15.9	320.81	333.18		55.5783		2.84302		-2.12026		-8.88707
160	16	323.333	333.18		70.7484		2.04509		-1.2918		-5.78166
161	16.1	330.095	333.18		136.608		4.84504		-2.82689		-3.08702
162	16.2	331.905	333.18		73.2549		2.99076		-2.435		-0.675921
163	16.3	342.286	333.18		125.829		3.97628		-1.48167		1.65705
164	16.4	336.952	333.18		84.4244		2.23285		-1.84564		-3.54915
165	16.5	305.429	333.18		61.4288		2.7611		-2.28679		-2.77001
166	16.6	325.333	333.18		78.5671		3.19444		-0.559486		-1.37246
167	16.7	339.619	333.18		62.0209		3.12423		-2.328		-3.21619
168	16.8	324.143	333.18		158.587		5.8012		-4.61201		-2.30624
169	16.9	297	333.18		137.344		4.41976		-1.71233		1.87192
170	17	342.857	333.18		84.6966		2.14604		-2.08885		1.42974
171	17.1	296.333	333.18		102.827		2.54761		-0.509237		-2.7075
172	17.2	363	333.18		142.412		4.47731		4.10789		-0.40802
173	17.3	362.048	333.18		129.391		3.15207		0.168041		-2.70272
174	17.4	335.333	333.18		88.0056		2.66227		2.84022		-0.0229135
175	17.5	327.143	333.18		46.007		3.31946		1.30687		0.425109
176	17.6	331.381	333.18		168.419		6.51982		-1.51324		-2.56936
177	17.7	340.857	333.18		174.451		6.92107		-3.62784		-3.74003
178	17.8	334.095	333.18		161.578		4.65093		1.70419		3.79188
179	17.9	507.952	487.309		38.3814		0.843418		1.85135		-2.021
180	18	338.857	333.18		122.153		4.68931		0.821464		2.83357
181	18.1	333.095	333.18		142.917		6.2496		5.38811		2.64121
182	18.2	338.381	333.18		171.704		6.15556		1.50074		3.85048
183	18.3	341.143	333.18		122.595		5.77606		2.20228		3.12213
184	18.4	348.286	333.18		126.429		4.28554		-0.28768		2.25684
185	18.5	342.286	333.18		112.783		3.01648		0.786037		9.98205
186	18.6	330.476	333.18		153.146		6.05177		-1.10799		1.95174
187	18.7	494.381	487.309		55.5513		3.12362		0.474099		-2.41448
188	18.8	508.19	487.309		114.503		5.87439		-2.55393		1.9696
189	18.9	510.952	487.309		96.2784		4.11273		-0.814385		4.9179
190	19	492.476	487.309		47.2103		0.884003		-0.0953245		4.11559
191	19.1	359.238	333.18		110.943		5.06878		0.768035		-1.03173
192	19.2	333.476	333.18		196.187		8.61553		-1.09894		-0.370068
193	19.3	295.667	333.18		189.161		7.45878		2.05693		4.18424
194	19.4	311.857	333.18		214.254		6.6895		-4.30653		5.55276
195	19.5	343.095	333.18		229.074		7.08529		-3.1123		-0.16691
196	19.6	362.476	333.18		157.647		5.84461		-0.342152		-1.53125
197	19.7	338.619	333.18		137.253		5.08286		-1.36074		-2.01821
198	19.8	318.714	333.18		120.319		5.2015		0.571172		-2.26658
199	19.9	331.286	333.18		42.6012		0.465443		1.798		0.92528
200	20	357.952	333.18		104.097		3.91844		1.66432		5.19184
201	20.1	346.714	333.18		158.454		5.17469		2.13522		-2.28332
202	20.2	350.619	333.18		234.421		9.43234		1.99389		5.78048
203	20.3	321.571	333.18		93.1755		4.86018		0.339216		3.56584
204	20.4	324.286	333.18		134.561		2.76137		0.214721		2.78167
205	20.5	314.19	333.18		164.423		7.57699		-1.52316		-2.21449
206	20.6	305.381	333.18		118.58		5.28749		0.336471		1.67714
207	20.7	361.143	333.18		156.246		5.18829		0.9012		-1.368
208	20.8	314.857	333.18		52.7114		3.13636		-0.717188		-3.42748
209	20.9	371.286	333.18		231.59		7.61508		0.939256		-1.46288
210	21	310.238	333.18		115.658		4.82489		0.422284		-1.11684
211	21.1	362.238	333.18		183.386		8.61178		-1.78329		-8.31108
212	21.2	319.524	333.18		83.8529		3.21216		-1.30766		-4.68326
213	21.3	327.952	333.18		229.857		7.54871		-0.471801		3.0105
214	21.4	339.286	333.18		216.068		8.59359		0.737508		-8.8134
215	21.5	487.857	487.309		117.105		5.09056		0.634212		-1.05126
216	21.6	466.619	487.309		152.893		4.48573		0.0577257		4.67986
217	21.7	355.048	333.18		376.784		9.64543		0.609488		6.60824
218	21.8	333.429	333.18		149.619		5.66552		1.69492		2.12998
219	21.9	420.571	487.309		223.993		10.1567		3.79347		-15.3321
220	22	484.143	487.309		276.186		9.0043		-0.452358		-5.52506
221	22.1	489.714	487.309		79.2904		3.77691		-1.51707		2.89318
222	22.2	488.333	487.309		90.861		3.58075		0.567477		-1.96812
223	22.3	393.333	487.309		93.8213		4.37703		-2.90426		-4.38897
224	22.4	462.762	487.309		210.329		8.91777		-3.18129		-4.97205
225	22.5	326.238	333.18		166.651		7.63705		5.77531		9.05716
226	22.6	329.19	333.18		104.3		4.0518		4.966		-2.73417
227	22.7	315.667	333.18		138.509		4.86622		4.92609		-7.67916
228	22.8	315.19	333.18		265.922		8.49731		-0.596919		-3.44691
229	22.9	323	333.18		151.085		5.99854		4.80893		0.571795
230	23	321.429	333.18		175.656		5.87975		0.162517		-1.72553
231	23.1	330.048	333.18		210.491		8.02338		2.60513		-0.158468
232	23.2	347.381	333.18		222.15		5.42717		0.963667		-0.41647
233	23.3	342.381	333.18		191.009		6.53917		0.750722		0.545013
234	23.4	349	333.18		168.03		5.20876		1.25582		-5.48134
235	23.5	495.571	487.309		103.466		4.3563		2.88728		-3.04381
236	23.6	506.952	487.309		113.839		4.26207		0.852219		-3.99235
237	23.7	508.143	487.309		113.375		4.78943		-2.07176		-1.80336
238	23.8	508.19	487.309		173.168		6.71695		2.43796		0.717474
239	23.9	479.857	487.309		141.723		5.95099		3.58786		0.455651
240	24	483.143	487.309		103.491		5.24273		2.47936		-1.55758
241	24.1	508.238	487.309		136.175		5.65898		5.07808		0.138039
242	24.2	443.429	487.309		142.664		6.08626		-1.67983		-2.09616
243	24.3	510.524	487.309		244.047		6.83214		-1.32161		-1.80736
244	24.4	415.905	487.309		196.421		7.21337		0.28503		1.64416
245	24.5	474.762	487.309		199.272		7.72663		-4.00722		-0.654351
246	24.6	473.952	487.309		144.325		5.99034		-2.90389		-5.05439
247	24.7	459.095	487.309		155.922		6.1031		-1.28758		17.6854
248	24.8	408.714	487.309		130.857		5.10537		-3.31991		-0.778477
249	24.9	449.714	487.309		63.8855		3.65712		0.956701		-2.70546
250	25	531.429	487.309		155.907		6.04023		2.10999		3.48732
251	25.1	501.476	487.309		181.826		4.87267		-0.180662		-7.04555
252	25.2	461.762	487.309		108.761		4.95389		-0.246146		-13.7648
253	25.3	476.524	487.309		75.5678		2.71397		-1.42063		-2.61604
254	25.4	513.381	487.309		168.856		6.7791		4.47507		5.03818
255	25.5	356.238	333.18		102.993		4.78381		-2.39951		-3.23568
256	25.6	342.619	333.18		192.953		7.4972		0.86814		-8.51747
257	25.7	515.762	487.309		115.297		5.17066		1.41037		5.22472
258	25.8	483.619	487.309		119.415		2.56995		-0.345446		-2.3677
259	25.9	436.857	487.309		46.986		2.21581		3.69891		-12.6082
260	26	355.714	333.18		257.276		7.70493		0.21923		6.18746
261	26.1	335.714	333.18		144.086		6.51364		0.426171		-6.70312
262	26.2	320.571	333.18		116.713		5.33093		-1.92522		-1.99196
263	26.3	366.714	333.18		172.253		5.56969		-2.96168		6.12542
264	26.4	339.524	333.18		224.478		6.7274		0.0951708		1.54967
265	26.5	316.952	333.18		112.354		4.96584		-0.129794		3.831
266	26.6	336.905	333.18		196.339		7.35753		-4.20591		2.78811
267	26.7	326.048	333.18		122.492		5.9317		-0.235829		-0.49521
268	26.8	347.714	333.18		134.784		5.64016		-1.2551		0.663778
269	26.9	345.81	333.18		114.338		5.26026		-1.29235		-5.33225
270	27	358.667	333.18		106.001		5.05217		-2.36583		-1.22013
271	27.1	316.619	333.18		85.9508		4.45398		-0.242863		1.85107
272	27.2	367.524	333.18		107.698		4.59524		-1.37833		2.01386
273	27.3	339.524	333.18		107.062		4.66902		2.41567		-1.31418
274	27.4	326.81	333.18		131.204		5.82502		2.61605		-1.51049
275	27.5	368.476	333.18		133.95		5.89363		-2.05914		-4.8263
276	27.6	343.905	333.18		174.982		6.09997		1.35755		-4.30528
277	27.7	296.619	333.18		205.455		5.13116		-3.09064		-0.0637882
278	27.8	319.952	333.18		211.953		6.80082		-1.848		-7.14592
279	27.9	351.667	333.18		270.787		9.20562		-2.89242		-7.61513
280	28	340.333	333.18		113.329		5.03787		0.93879		1.05559
281	28.1	369.476	333.18		288.519		10.0142		-3.99371		-1.43958
282	28.2	465.714	487.309		114.861		5.30579		4.5682		3.5766
283	28.3	444	487.309		166.449		6.7643		-0.0624481		2.88986
284	28.4	358.476	333.18		110.844		4.1365		3.40696		2.42373
285	28.5	334.762	333.18		205.926		6.4217		-5.13491		-1.42679
286	28.6	331.333	333.18		205.198		7.19658		0.121441		-0.362127
287	28.7	320.762	333.18		88.6684		3.64651		-0.392015		3.70883
288	28.8	350.571	333.18		149.834		6.77949		-7.1752		4.52866
289	28.9	345.286	333.18		64.8227		2.94037		0.0665128		0.0985432
290	29	340.095	333.18		160.547		4.94041		-3.02644		0.267456
291	29.1	330.905	333.18		96.5602		4.44917		1.49404		-1.08214
292	29.2	415.143	487.309		129.152		5.82295		-0.524319		-6.8742
293	29.3	465.571	487.309		106.055		3.78566		-2.35939		1.55015
294	29.4	444.905	487.309		173.234		7.34689		1.98122		5.74853
295	29.5	483.19	487.309		249.585		7.93819		-0.314997		4.79447
296	29.6	494.238	487.309		308.58		9.40244		-2.68465		-3.11222
297	29.7	490.095	487.309		116.951		3.02401		-1.14531		-0.867282
298	29.8	466.81	487.309		99.6215		4.98144		-3.39235		-9.54846
299	29.9	504.524	487.309		175.14		5.63452		-2.56286		7.53297
300	30	536.333	487.309		102.95		4.20045		-1.3715		4.7442
301	30.1	461	487.309		163.778		5.23247		-0.728746		-4.87336
302	30.2	443.762	487.309		107.143		4.94503		-1.95695		4.73111
303	30.3	472.095	487.309		126.515		5.55248		-1.13508		2.07351
304	30.4	430.048	487.309		119.135		4.67886		-0.179468		-3.86394
305	30.5	499.905	487.309		297.621		10.314		-3.1876		-18.5184
306	30.6	504.429	487.309		155.858		4.77178		-3.09542		-1.48308
307	30.7	456.762	487.309		161.268		6.2821		2.06302		2.1672
308	30.8	446.952	487.309		167.391		5.19248		2.41808		-13.2808
309	30.9	514.333	487.309		145.737		6.90717		3.59708		-0.490217
310	31	457.048	487.309		108.806		4.08152		2.31391		-5.51428
311	31.1	478.524	487.309		129.685		5.2829		4.84361		-1.89844
312	31.2	445.619	487.309		144.354		5.70462		2.22103		1.23482
313	31.3	476.238	487.309		102.575		3.70717		-0.350454		4.70642
314	31.4	494.714	487.309		204.056		7.12522		-1.44874		0.514428
315	31.5	467.762	487.309		170.603		6.85006		4.61458		-0.62229
316	31.6	442.857	487.309		146.521		6.70208		4.30323		4.81866
317	31.7	474.905	487.309		213.69		6.96044		1.00708		-1.48839
318	31.8	482.857	487.309		171.124		4.9106		2.33858		-3.70589
319	31.9	394.286	487.309		336.267		10.8875		3.22501		-14.3158
320	32	356.095	487.309		142.506		6.30064		3.59977		-8.86091
321	32.1	464.286	487.309		193.828		6.66611		1.51092		16.773
322	32.2	602.762	487.309		132.681		5.43598		4.71665		3.4557
323	32.3	307.905	333.18		188.703		7.1462		-0.771749		11.6016
324	32.4	391.143	333.18		140.566		4.76627		4.20051		2.27875
325	32.5	334.429	333.18		190.081		5.72984		3.35256		0.773613
326	32.6	478.143	487.309		94.2048		4.67466		-0.218763		5.31852
327	32.7	375.429	333.18		77.6353		3.97266		1.65221		-2.4851
328	32.8	334.571	333.18		110.265		5.74048		1.83461		-0.673818
329	32.9	322.524	333.18		96.8146		6.16389		-2.19809		-6.30678
330	33	324.524	333.18		106.927		4.4837		-1.43039		-0.451922
331	33.1	368.238	333.18		81.1343		3.3558		-2.36656		-0.86101
332	33.2	368.095	333.18		143.933		5.64484		0.730878		-1.97764
333	33.3	343.429	333.18		99.322		4.42243		-0.518452		14.348
334	33.4	347.095	333.18		139.365		4.16294		0.0362732		1.83441
335	33.5	334.333	333.18		105.517		4.84076		3.74856		-17.9361
336	33.6	318.714	333.18		203.332		7.83057		0.243612		-4.20769
337	33.7	353.333	333.18		171.189		7.35183		-1.15242		1.07269
338	33.8	332.095	333.18		137.374		4.70647		-1.15377		2.88675
339	33.9	342.857	333.18		243.285		5.82538		1.92773		-6.22811
340	34	339.476	333.18		96.3803		4.0042		2.87508		4.66071
341	34.1	316.714	333.18		194.531		7.53391		0.828272		1.60207
342	34.2	316.143	333.18		147.171		4.99267		4.05316		1.64492
343	34.3	310.667	333.18		221.664		7.71326		-2.1128		-2.01048
344	34.4	331.524	333.18		143.4		6.58343		-0.441533		1.2027
345	34.5	320.333	333.18		208.43		7.57676		3.21144		-0.627197
346	34.6	334.381	333.18		237.486		6.36474		0.436075		5.61534
347	34.7	312.524	333.18		114.684		3.73683		-1.9945		-1.62653
348	34.8	328.143	333.18		155.579		6.54308		-2.65424		-3.80308
349	34.9	351.333	333.18		109.543		4.95806		-0.936071		0.0230107
350	35	349.714	333.18		222.062		5.16907		6.58794		-0.278182
351	35.1	342.81	333.18		138.742		5.82777		4.1871		2.60527
352	35.2	505.238	487.309		123.524		4.99693		4.79234		6.41746
353	35.3	483.476	487.309		165.395		6.18065		7.1981		3.61489
354	35.4	433.714	487.309		247.823		9.22916		4.75188		-5.0475
355	35.5	506.952	487.309		97.508		3.92813		7.41945		-5.85851
356	35.6	467.476	487.309		134.327		5.36906		2.95848		-3.08021
357	35.7	462.19	487.309		174.228		7.29547		4.2672		6.03812
358	35.8	448.476	487.309		127.798		4.00746		5.04297		-2.90967
359	35.9	547.238	487.309		96.5925		3.26468		2.33377		0.426108
360	36	504.143	487.309		118.585		5.39366		2.36915		0.766514
361	36.1	491.857	487.309		116.701		3.5251		1.63458		-5.99478
362	36.2	447.238	487.309		235.087		4.6166		1.54747		-1.29709
363	36.3	473.952	487.309		111.095		4.44998		-0.715302		12.0042
364	36.4	482.143	487.309		402.107		5.80158		0.438013		0.665947
365	36.5	531.048	487.309		116.292		5.21749		-0.322613		2.65122
366	36.6	474.095	487.309		182.48		5.58023		0.0131485		-3.43086
367	36.7	481.571	487.309		151.896		4.77345		-1.25738		-1.29332
368	36.8	397.286	487.309		166.426		5.61747		-1.48846		-1.19596
369	36.9	323.381	333.18		167.182		4.41463		-1.86859		4.29386
370	37	355.571	333.18		255.499		8.48238		2.91376		9.76372
371	37.1	320.476	333.18		176.433		4.8116		0.629162		-8.35081
372	37.2	324.286	333.18		136.036		4.66256		3.09724		-0.322041
373	37.3	362.714	333.18		312.456		11.5442		-2.46748		-1.06448
374	37.4	338.952	333.18		233.408		7.27734		2.76719		1.43833
375	37.5	331.333	333.18		232.076		3.7435		1.18488		-8.62804
376	37.6	290.238	333.18		229.695		3.52957		0.982871		-4.28287
377	37.7	309.476	333.18		222.039		4.70975		0.0625509		-0.446883
378	37.8	314.905	333.18		338.113		6.24721		1.69254		3.29622
379	37.9	317.857	333.18		336.08		4.18875		1.55399		-0.335636
380	38	304.524	333.18		61.6236		4.19744		-0.660863		0.789973
381	38.1	323.667	333.18		73.4717		4.05429		-0.0144241		-0.592647
382	38.2	316.333	333.18		48.9743		3.71036		2.69825		-4.12817
383	38.3	326.571	333.18		88.6462		4.07598		0.602126		19.9761
384	38.4	314.667	333.18		88.654		5.39362		-0.108671		2.20161
385	38.5	297.381	333.18		104		5.7511		0.874375		-4.84766
386	38.6	343.095	333.18		88.7561		3.10071		2.56258		-0.992758
387	38.7	372.81	333.18		98.7375		6.07737		-0.0278734		-5.28786
388	38.8	424.048	487.309		94.1726		5.8869		-1.23002		8.20336
389	38.9	350.476	333.18		181.104		8.43856		1.79006		3.02462
390	39	328.905	333.18		18.6158		1.70065		1.27381		-5.92997
391	39.1	326.952	333.18		60.8165		5.38124		0.607276		-6.00287
392	39.2	343.476	333.18		59.2364		4.41566		0.0109589		-1.82912
393	39.3	310	333.18		49.8563		4.85663		-0.776844		1.22712
394	39.4	313.762	333.18		72.475		8.2758		-0.289131		2.85655
395	39.5	326.238	333.18		44.0559		5.22025		-2.89441		-5.12881
396	39.6	306.238	333.18		33.475		3.28929		0.546554		-0.125379
397	39.7	357.524	333.18		54.7513		6.04065		-2.05452		0.273545
398	39.8	332.238	333.18		36.8026		3.86068		-3.18054		4.27268
399	39.9	319.619	333.18		62.0746		6.3119		-1.81301		-4.14492
400	40	327.19	333.18		41.992		4.97304		-2.86094		1.45431
401	40.1	344.952	333.18		129.469		14.4173		-1.70712		0.478637
402	40.2	320.762	333.18		73.7507		8.05883		-1.2651		-0.0367517
403	40.3	319.333	333.18		96.3671		4.0815		-2.838		-2.89045
404	40.4	360.667	333.18		65.3962		5.13641		2.8804		0.504468
405	40.5	349.048	333.18		97.9513		5.48312		-3.63144		0.0884053
406	40.6	331.095	333.18		130.147		7.4212		0.436912		8.09335
407	40.7	344.619	333.18		64.7506		4.27086		-1.31801		-1.08892
408	40.8	331.714	333.18		86.9749		4.91596		1.89362		-1.66389
409	40.9	339.286	333.18		85.6401		4.94161		-2.0383		-2.97538
410	41	349.381	333.18		72.7172		3.63843		-1.19884		1.64497
411	41.1	314.905	333.18		148.173		8.27031		-0.522855		-10.4918
412	41.2	361.667	333.18		81.5158		4.18777		-1.21256		1.08786
413	41.3	294.524	333.18		53.8363		3.68118		-1.38811		2.88445
414	41.4	312	333.18		148.298		9.19182		-2.4222		-11.446
415	41.5	339.762	333.18		50.7546		1.38346		-0.478123		2.44776
416	41.6	496.095	487.309		70.0352		5.42881		1.18078		2.44285
417	41.7	375.762	333.18		109.279		6.01582		2.12138		0.506382
418	41.8	344	333.18		40.5879		2.83876		1.01361		-1.4557
419	41.9	350.476	333.18		104.653		6.35251		0.349216		1.94032
420	42	332.476	333.18		189.146		8.09493		-0.343409		0.189751
421	42.1	363.571	333.18		84.6535		5.64277		0.246138		-1.31253
422	42.2	361.714	333.18		83.6044		4.29459		-0.768724		2.35541
423	42.3	343.381	333.18		103.426		9.2274		-0.386522		-0.731297
424	42.4	352.333	333.18		58.6391		6.02907		2.8699		1.93087
425	42.5	341.905	333.18		50.3111		4.98456		1.58476		1.14756
426	42.6	318.524	333.18		78.3439		8.5381		0.402782		-5.21236
427	42.7	375.286	333.18		41.331		4.1442		0.363557		1.59667
428	42.8	344.524	333.18		45.1265		4.92418		0.730894		-4.62966
429	42.9	343.952	333.18		70.1153		6.77893		-1.03918		-4.19439
430	43	323.19	333.18		141.503		4.80668		0.0666652		-14.3061
431	43.1	382.381	333.18		60.0217		5.65131		-1.46156		-4.49624
432	43.2	303.143	333.18		60.5314		6.66469		-3.04685		8.22106
433	43.3	324.857	333.18		86.7414		8.75131		-0.970197		-2.05723
434	43.4	308.619	333.18		79.417		7.7757		-1.13107		-2.23451
435	43.5	335.571	333.18		99.0142		9.55543		0.366946		-0.0470905
436	43.6	309.048	333.18		37.1281		4.53964		3.83515		-1.46975
437	43.7	341.333	333.18		56.9415		5.60257		1.24275		3.84528
438	43.8	340.857	333.18		70.7515		7.1334		1.64402		-2.70094
439	43.9	325.095	333.18		90.9669		4.37185		-0.44612		-7.54314
440	44	339.19	333.18		35.8058		2.69752		0.727159		2.63265
441	44.1	345.952	333.18		63.53		4.06697		0.0739608		-1.05674
442	44.2	318.81	333.18		64.4496		4.02335		-1.98782		2.45205
443	44.3	339	333.18		105.415		6.64763		-1.13051		3.43218
444	44.4	330.714	333.18		92.8915		4.37093		-0.476274		2.93037
445	44.5	340.619	333.18		143.003		7.72373		-0.953547		-6.27724
446	44.6	320.857	333.18		41.1589		4.18061		-0.345681		-9.22737
447	44.7	362.81	333.18		69.4108		5.06978		-0.239785		5.80637
448	44.8	370.286	333.18		64.5629		4.50469		0.593922		2.38622
449	44.9	352.048	333.18		60.558		3.42109		1.05163		-12.1854
450	45	347.048	333.18		36.1249		3.25798		-2.44433		-7.81172
451	45.1	534.429	487.309		66.669		2.85522		1.05463		6.49098
452	45.2	494.476	487.309		66.1555		4.45838		0.483028		-1.95651
453	45.3	529.095	487.309		45.8725		2.46407		2.04067		2.20522
454	45.4	522.095	487.309		98.0059		5.45426		0.0749931		5.40588
455	45.5	497.81	487.309		59.0115		3.14354		1.32092		3.17502
456	45.6	534.238	487.309		143.172		6.62326		-1.48805		-1.86641
457	45.7	370.667	333.18		94.2535		5.43724		0.0442937		-4.08183
458	45.8	344.19	333.18		104.771		5.55708		-5.05329		5.14773
459	45.9	336.667	333.18		72.6157		3.94192		-0.284975		-3.12913
460	46	303.667	333.18		46.7151		2.85554		-1.19923		3.52755
461	46.1	329.429	333.18		149.126		8.58283		0.793738		-2.22765
462	46.2	331.238	333.18		78.4281		4.51552		3.69477		0.82582
463	46.3	333	333.18		110.526		6.02371		1.23013		19.7308
464	46.4	327.19	333.18		54.3862		3.43901		1.3002		10.6773
465	46.5	329.095	333.18		222.074		12.1496		1.59001		-0.558454
466	46.6	358.381	333.18		175.539		9.21022		3.08014		2.79912
467	46.7	347.667	333.18		163.034		7.50184		1.73706		-4.69919
468	46.8	322.857	333.18		143.621		7.72882		0.363896		6.72829
469	46.9	339.762	333.18		50.0491		3.31216		-0.829054		4.063
470	47	324	333.18		32.8463		2.3887		-1.34194		8.49278
471	47.1	375.905	333.18		54.7996		3.33781		-3.7398		-1.09376
472	47.2	320.238	333.18		128.027		7.68		-2.54599		0.32003
473	47.3	504	487.309		73.6752		4.63061		-1.85323		1.74089
474	47.4	462.762	487.309		133.277		7.958		-1.60387		-11.57
475	47.5	333.667	333.18		64.7642		4.73441		1.59992		1.65038
476	47.6	332.81	333.18		58.7399		4.22969		-0.0977909		-0.105548
477	47.7	523.619	487.309		184.838		12.4059		0.381674		0.362546
478	47.8	573.571	487.309		70.5215		5.1033		2.14558		-1.62147
479	47.9	442.143	487.309		121.995		9.14053		0.60435		8.81868
480	48	443.333	487.309		174.639		11.8387		-0.491868		1.5635
481	48.1	478.667	487.309		147.522		9.84214		-0.920613		-3.44373
482	48.2	442.714	487.309		50.1875		3.56238		1.72918		-3.8836
483	48.3	511.524	487.309		244.334		16.7685		3.37468		-2.71055
484	48.4	522.714	487.309		71.3607		4.80403		1.12282		-1.33801
485	48.5	539.857	487.309		136.285		9.36747		0.884514		1.22084
486	48.6	580.19	487.309		104.955		6.80308		-2.84343		1.02846
487	48.7	364.429	333.18		136.074		9.32259		-0.861875		2.29578
488	48.8	325	333.18		117.588		7.91129		1.44836		-3.64867
489	48.9	320.524	333.18		87.4283		6.28939		1.94806		0.570244
490	49	340.095	333.18		49.1321		3.40318		-0.336515		1.245
491	49.1	313.19	333.18		234.821		15.9395		-0.615873		-4.57078
492	49.2	335.333	333.18		119.952		8.45395		-1.2238		-4.30774
493	49.3	348.333	333.18		149.561		10.1227		-0.0543024		2.70838
494	49.4	321.476	333.18		70.6712		5.04506		0.467445		2.38425
495	49.5	355.429	333.18		94.0339		6.73258		3.85578		-25.389
496	49.6	378.476	333.18		170.465		11.7024		-1.3986		-19.5715
497	49.7	323.81	333.18		334.659		22.8595		-0.884223		4.41245
498	49.8	354.19	333.18		110.889		7.05914		-2.13732		-28.7219
499	49.9	334.667	333.18		206.701		14.3669		-1.80618		10.7972
500	50	320.857	333.18		147.988		11.0654		0.89739		-0.636724
501	50.1	364.476	333.18		101.078		7.14624		-0.0473663		-3.02501
502	50.2	513.667	487.309		70.4367		5.43525		0.235774		-0.720689
503	50.3	568.952	487.309		236.236		17.4422		4.02664		1.55944
504	50.4	374.952	333.18		93.0052		6.45374		0.56767		0.455965
505	50.5	326.524	333.18		54.6806		4.16877		1.15669		0.128631
506	50.6	353.238	333.18		65.5359		4.58778		-0.871801		-1.98177
507	50.7	351.667	333.18		175.345		11.7674		3.06925		4.53996
508	50.8	362.857	333.18		161.095		11.641		-0.165405		0.186547
509	50.9	363.81	333.18		79.5095		5.85026		0.699756		1.65547
510	51	344.905	333.18		105.042		6.41473		0.426635		3.5811
511	51.1	386.762	333.18		110.27		7.97613		-0.533776		-0.359706
512	51.2	330.143	333.18		178.83		12.7496		-0.0106243		-3.23766
513	51.3	326.714	333.18		85.618		6.38309		-0.397164		-6.75136
514	51.4	313.238	333.18		165.73		11.4671		-0.853054		-11.4182
515	51.5	327.952	333.18		132.809		9.04763		-0.58161		3.14073
516	51.6	308.286	333.18		146.375		8.95384		0.0377989		0.882396
517	51.7	338.238	333.18		143.187		10.2333		-1.32261		14.7381
518	51.8	308.905	333.18		92.06		6.51993		0.393618		-3.09813
519	51.9	345.286	333.18		122.415		8.90496		-2.08895		1.07993
520	52	358.286	333.18		224.826		15.3697		-0.0736908		16.0148
521	52.1	356.238	333.18		167.367		11.9933		1.50839		13.5442
522	52.2	377.143	333.18		71.1364		5.01416		-0.378387		-10.5656
523	52.3	510.905	487.309		192.545		12.5586		4.71004		-14.7096
524	52.4	545.857	487.309		88.7158		6.84279		0.432679		-3.7472
525	52.5	508.048	487.309		106.941		7.65725		3.33733		-0.212617
526	52.6	532.286	487.309		75.1255		5.19552		2.95778		1.74024
527	52.7	538.619	487.309		105.493		8.03616		1.37744		-0.0183691
528	52.8	320.714	333.18		263.582		19.3517		-1.25225		0.0795993
529	52.9	336.667	333.18		83.7714		6.32224		-0.464947		-10.6592
530	53	331.238	333.18		110.436		8.02371		-1.29214		-14.5051
531	53.1	326.857	333.18		79.1264		5.60111		1.55131		9.953
532	53.2	334.905	333.18		52.015		3.82313		-0.73805		-3.23586
533	53.3	315.857	333.18		189.711		13.0794		0.509695		0.903774
534	53.4	335.429	333.18		53.0206		4.01614		-0.382252		-2.37766
535	53.5	301.048	333.18		123.245		9.14091		0.531884		0.848178
536	53.6	321.667	333.18		192.485		13.4144		0.970461		2.31673
537	53.7	303.857	333.18		80.6211		5.71793		0.257593		-9.31414
538	53.8	315.714	333.18		138.997		9.78241		0.053135		6.84082
539	53.9	328.619	333.18		110.129		7.82033		0.215598		-1.06552
540	54	328.286	333.18		63.4963		4.57808		-0.132505		0.99777
541	54.1	365.19	333.18		64.3933		4.85137		-1.36416		-2.6848
542	54.2	340.667	333.18		146.754		10.3606		-0.760099		3.5738
543	54.3	329.048	333.18		110.056		8.16706		-0.0642575		4.64023
544	54.4	335.762	333.18		109.894		8.49684		-2.53097		4.27567
545	54.5	327.905	333.18		162.471		11.1758		6.05187		-1.97893
546	54.6	326.238	333.18		216.268		15.5256		1.36182		0.441826
547	54.7	314.714	333.18		49.7424		3.94534		-0.170403		-0.266389
548	54.8	323.571	333.18		65.3275		4.83177		-0.00264265		-2.58762
549	54.9	326.857	333.18		289.454		19.2398		1.40273		3.39098
550	55	294.619	333.18		66.0415		5.04171		-0.587768		-8.99119
551	55.1	318.905	333.18		167.325		11.3522		1.14792		-0.639435
552	55.2	333.286	333.18		58.0994		4.23807		0.254168		1.67192
553	55.3	318.524	333.18		158.034		11.6807		-0.341752		0.0781828
554	55.4	334.286	333.18		188.507		12.9661		2.59897		-0.368345
555	55.5	330.286	333.18		221.964		15.864		3.10065		0.990683
556	55.6	335.857	333.18		79.6969		6.07564		1.7656		-3.25906
557	55.7	317.762	333.18		116.883		8.46277		-2.62567		0.519704
558	55.8	361.619	333.18		192.345		12.4011		0.30238		0.177113
559	55.9	318.952	333.18		93.1409		6.98302		-2.79167		-1.84954
560	56	346.762	333.18		121.26		7.97512		2.48341		-0.644363
561	56.1	340.286	333.18		195.976		13.2862		0.912454		8.28945
562	56.2	328.476	333.18		91.7715		6.6604		0.248375		0.440968
563	56.3	327.762	333.18		70.7086		4.95244		-1.06306		-0.592605
564	56.4	327	333.18		79.8593		5.38518		-1.95166		2.0556
565	56.5	339.952	333.18		205.004		15.8717		-0.113055		-14.2819
566	56.6	310.952	333.18		128.564		5.83881		0.601842		2.85638
567	56.7	342	333.18		123.941		4.30671		5.07271		12.2205
568	56.8	342.571	333.18		143.532		6.91642		0.218621		5.36978
569	56.9	342.762	333.18		71.8033		3.61625		0.859098		4.16445
570	57	340.429	333.18		120.503		4.23544		0.591432		-19.8766
571	57.1	346	333.18		127.415		5.0599		-1.90568		-2.4416
572	57.2	326.143	333.18		202.337		8.07469		-0.833061		0.291922
573	57.3	334.81	333.18		181.241		9.87576		0.278159		2.85131
574	57.4	327.476	333.18		187.705		9.69205		2.04121		2.80451
575	57.5	334.952	333.18		126.485		7.23467		-0.346983		2.33634
576	57.6	340.286	333.18		103.985		5.6322		-0.244124		-6.63678
577	57.7	338.952	333.18		150.986		7.8166		0.913502		2.13585
578	57.8	320.571	333.18		94.5927		4.82924		-0.738102		-0.0293089
579	57.9	597.667	487.309		261.14		9.84724		-0.878119		0.660502
580	58	512.762	487.309		293.13		12.7269		1.34568		-1.27056
581	58.1	591.857	487.309		193.946		8.9938		0.0803282		-10.272
582	58.2	562.429	487.309		60.813		3.96959		2.66879		1.82651
583	58.3	617.238	487.309		80.0109		4.84177		-0.136917		0.0479055
584	58.4	518.571	487.309		74.7095		4.7838		-1.234		-15.2455
585	58.5	467.286	487.309		58.1476		3.1924		0.876734		4.23082
586	58.6	439	487.309		125.207		7.37443		0.764428		-1.60229
587	58.7	327.095	333.18		95.3263		5.60761		-0.876333		1.96998
588	58.8	355.286	333.18		111.878		7.14382		-3.63048		-0.907555
589	58.9	332.143	333.18		138.93		6.95703		-0.046906		-9.2393
590	59	313.619	333.18		129.165		6.83553		-2.49354		1.15147
591	59.1	345.095	333.18		29.2608		1.72897		0.731619		-6.67512
592	59.2	335.476	333.18		114.56		5.2347		0.665129		3.2146
593	59.3	333.524	333.18		154.129		8.6805		-0.0285619		0.000767774
594	59.4	322.476	333.18		270.48		13.2777		0.768429		-16.7769
595	59.5	337.476	333.18		188.195		10.4266		0.645496		1.10554
596	59.6	332.286	333.18		85.6594		4.88407		1.13455		-2.30767
597	59.7	370.619	333.18		106.466		6.35638		-0.454127		9.23068
598	59.8	324.381	333.18		101.911		4.83837		1.34385		2.80383
599	59.9	330.048	333.18		92.1166		4.64253		-1.95256		-0.111139
600	60	344.952	333.18		303.889		15.162		0.582429		1.08775
601	60.1	351.857	333.18		200.457		8.91042		-0.498842		-2.736
602	60.2	319.143	333.18		95.1369		5.41201		0.0618293		-4.89861
603	60.3	350.762	333.18		130.916		8.50945		-1.69193		0.730474
604	60.4	346.524	333.18		142.108		7.57862		2.21362		-1.65979
605	60.5	353.524	333.18		74.4209		4.10065		0.242403		6.78983
606	60.6	333.667	333.18		108.196		5.15832		-0.564145		0.526035
607	60.7	335.905	333.18		66.2099		4.04045		0.601041		-4.59264
608	60.8	339.762	333.18		312.795		18.5994		-0.211704		-1.6903
609	60.9	324.333	333.18		72.5597		3.86415		-0.595893		4.8163
610	61	344.714	333.18		92.123		4.92771		0.437682		-8.48643
611	61.1	323	333.18		134.004		7.25076		-0.76597		-0.631604
612	61.2	327.095	333.18		85.3786		4.30065		-2.17971		-5.58268
613	61.3	329.476	333.18		254.244		8.95098		1.86765		5.72852
614	61.4	309.048	333.18		85.3703		3.97108		-0.932171		3.36928
615	61.5	320.476	333.18		154.503		6.82026		-3.58775		-2.76077
616	61.6	344.238	333.18		112.201		6.05854		0.0639496		-2.57996
617	61.7	330.81	333.18		157.032		6.10796		1.04911		2.25746
618	61.8	357.238	333.18		284.674		10.1645		-0.0755662		0.575575
619	61.9	324.619	333.18		183.794		8.88256		-0.638864		-2.57936
620	62	315.667	333.18		197.5		9.77661		0.64356		-3.5851
621	62.1	338.095	333.18		113.003		5.60661		0.196731		29.1516
622	62.2	330.476	333.18		111.632		5.85002		0.877003		13.8577
623	62.3	341.714	333.18		104.221		4.91964		-0.603711		0.646966
624	62.4	340.333	333.18		135.341		7.62432		0.968348		-3.23906
625	62.5	325.476	333.18		184.214		9.71707		-0.723721		-10.1777
626	62.6	328.238	333.18		180.864		8.98231		-0.236096		1.31372
627	62.7	337	333.18		92.3183		5.69314		-1.49861		-1.29787
628	62.8	332	333.18		70.0878		4.45649		0.864389		4.29636
629	62.9	305.952	333.18		151.725		7.96555		0.481159		-0.04012
630	63	321.81	333.18		105.746		6.00451		-0.3749		-6.13177
631	63.1	301.429	333.18		85.0489		4.89319		-1.78708		5.77999
632	63.2	332.762	333.18		173.569		9.38246		-2.40868		0.629185
633	63.3	328.381	333.18		67.4927		4.20409		-0.162287		-1.25373
634	63.4	329.238	333.18		150.955		8.08328		3.10974		5.71085
635	63.5	323.476	333.18		152.919		4.9699		1.11876		-5.6497
636	63.6	319.095	333.18		101.402		5.92627		0.134105		-0.707006
637	63.7	328.714	333.18		128.55		5.75422		-0.219343		0.86087
638	63.8	337.714	333.18		170.529		9.58221		-0.519719		1.82976
639	63.9	313	333.18		156.806		8.57609		-1.33556		-0.762391
640	64	306.286	333.18		139.218		7.14476		1.08752		-1.32712
641	64.1	336.667	333.18		137.756		7.12064		-2.09677		-3.26492
642	64.2	308.667	333.18		181.092		9.38268		-0.733162		18.0333
643	64.3	326.714	333.18		110.975		6.40924		-1.06901		5.11426
644	64.4	321.143	333.18		130.832		6.17531		-0.361943		-4.26188
645	64.5	461.81	487.309		128.23		6.37279		0.224055		2.05191
646	64.6	523.476	487.309		114.1		6.16506		2.43723		-1.3243
647	64.7	476.714	487.309		131.833		7.63981		0.254903		-0.18991
648	64.8	556.095	487.309		153.072		5.69566		-1.96579		0.715816
649	64.9	497.762	487.309		127.448		6.99239		0.663172		3.9871
650	65	503.381	487.309		54.2986		2.88148		-0.14264		0.226828
651	65.1	348.286	333.18		246.526		8.73135		-2.51978		-1.82464
652	65.2	320.905	333.18		114.336		6.33402		-0.383834		2.13234
653	65.3	315.571	333.18		149.726		7.64933		2.79561		8.52311
654	65.4	329.095	333.18		197.373		10.0285		-1.90627		-2.26077
655	65.5	317.238	333.18		174.773		8.57846		1.10094		-5.68067
656	65.6	312.762	333.18		226.114		8.14905		2.88966		1.73553
657	65.7	406.952	487.309		116.162		6.51304		-0.992461		0.550565
658	65.8	426.476	487.309		95.3041		5.31349		-4.51382		6.60387
659	65.9	326.762	333.18		109.743		6.0943		0.819439		0.871219
660	66	312.857	333.18		375.515		19.8851		0.732987		1.3249
661	66.1	338.095	333.18		133.425		5.52484		-0.740034		-13.8298
662	66.2	334.238	333.18		99.4892		5.97214		-0.371587		8.97668
663	66.3	431.714	487.309		134.262		6.97751		-3.23015		-9.81717
664	66.4	336.952	333.18		227.389		10.7834		4.44433		-3.86042
665	66.5	350.762	333.18		133.352		7.15817		2.84171		-3.95547
666	66.6	324.714	333.18		231.93		12.4057		0.576303		-2.74124
667	66.7	337.476	333.18		109.796		5.14666		-0.732641		0.825776
668	66.8	351.762	333.18		120.773		5.88917		1.9729		-3.00227
669	66.9	365.762	333.18		152.008		6.57588		1.71631		-2.3858
670	67	377.952	333.18		111.134		3.92198		-0.3605		-2.01462
671	67.1	348.095	333.18		119.658		5.67913		0.898732		1.80485
672	67.2	308.333	333.18		99.4719		4.54676		-0.494501		6.09807
673	67.3	370.762	333.18		191.555		8.39595		-0.580262		1.84457
674	67.4	348.857	333.18		97.1834		5.87364		1.41659		0.358508
675	67.5	310.143	333.18		176.645		8.37827		0.589834		5.03807
676	67.6	346.952	333.18		77.0066		4.0787		-0.930495		-0.402784
677	67.7	345.381	333.18		122.774		6.41807		0.347518		-2.89687
678	67.8	322.524	333.18		133.559		6.76392		1.2538		-0.577495
679	67.9	345.857	333.18		205.446		8.3568		2.37183		3.05095
680	68	341.571	333.18		144.65		5.2442		1.22013		-0.379374
681	68.1	323.333	333.18		166.404		8.55575		-0.596332		4.59218
682	68.2	338.333	333.18		117.944		6.26393		-0.951616		0.508097
683	68.3	334.381	333.18		120.651		5.92515		-2.25733		1.72162
684	68.4	298.714	333.18		178.172		8.9224		1.73065		-2.08198
685	68.5	331.857	333.18		178.829		10.0223		-0.914455		-0.202629
686	68.6	302.81	333.18		158.935		7.42447		1.3317		-0.0169588
687	68.7	323.476	333.18		120.987		6.1103		-1.33667		0.22734
688	68.8	368.048	333.18		82.0791		4.49617		-0.41205		-0.517675
689	68.9	335.048	333.18		75.0235		4.33323		-1.54018		-3.57343
690	69	342.333	333.18		102.723		6.13073		0.847863		-1.66816
691	69.1	372.143	333.18		108.934		6.14589		0.274612		0.819606
692	69.2	328.524	333.18		259.379		9.48414		0.600144		-1.31447
693	69.3	336.619	333.18		112.371		6.67527		0.652545		-1.99824
694	69.4	333.952	333.18		172.838		7.1998		3.31082		1.7277
695	69.5	317.238	333.18		144.851		7.15209		2.01241		-4.42015
696	69.6	313.333	333.18		187.126		9.65062		-0.155733		-8.42621
697	69.7	342.667	333.18		205.646		10.1211		-0.350076		-1.48753
698	69.8	322.81	333.18		184.772		9.45526		3.26448		6.63048
699	69.9	297.667	333.18		116.877		7.41383		-4.54252		-2.08955
700	70	320.476	333.18		82.8687		4.85793		-2.57105		0.392142
701	70.1	309.667	333.18		78.5645		4.63873		0.0780019		2.36498
702	70.2	341.714	333.18		162.244		7.87365		-1.23455		-3.90889
703	70.3	321.429	333.18		103.291		5.78453		-5.1088		3.22016
704	70.4	335.905	333.18		134.369		7.30817		-1.12595		-2.32022
705	70.5	328.19	333.18		210.829		10.8645		1.3212		0.254681
706	70.6	290.905	333.18		197.65		9.60885		0.0521032		-0.259568
707	70.7	310.714	333.18		45.8287		2.98362		1.26607		-4.0899
708	70.8	322.762	333.18		163.152		9.15256		-1.88653		0.691629
709	70.9	333.762	333.18		123.159		6.26524		-1.84844		-3.47206
710	71	344.81	333.18		91.993		5.22521		1.67949		-5.84694
711	71.1	299.333	333.18		95.4397		4.61041		0.796042		3.36697
712	71.2	340.905	333.18		210.185		6.14901		-1.53275		3.33706
713	71.3	307.524	333.18		242.595		10.5055		-0.804553		-2.08188
714	71.4	314.238	333.18		301.832		12.064		-2.03643		5.42498
715	71.5	333.857	333.18		288.248		11.9023		0.169462		-4.57836
716	71.6	327.619	333.18		149.396		8.86699		-0.429138		-1.36406
717	71.7	362.333	333.18		164.699		7.01658		-0.147593		4.62997
718	71.8	535.238	487.309		212.498		10.9171		0.205411		-2.55355
719	71.9	493.095	487.309		176.131		9.00239		-0.153046		-12.334
720	72	517.048	487.309		198.359		8.8885		0.0438548		-0.968268
721	72.1	499.571	487.309		252.457		12.5724		0.477369		1.87568
722	72.2	457.048	487.309		286.233		14.023		1.04804		2.22707
723	72.3	500.333	487.309		321.436		15.7398		-0.504104		-1.81377
724	72.4	497.857	487.309		77.6223		4.31002		1.00715		-0.937634
725	72.5	447.762	487.309		145.57		7.72684		0.274931		0.431816
726	72.6	490.429	487.309		103.424		5.79645		-0.575919		-8.44383
727	72.7	456.238	487.309		122.634		6.23822		-0.139307		6.01468
728	72.8	480.048	487.309		165.734		6.57006		-0.16551		4.42422
729	72.9	500	487.309		81.9645		5.21122		-2.20821		3.01864
730	73	474.857	487.309		191.279		8.94153		0.186869		6.25925
731	73.1	490.952	487.309		135.966		6.78798		4.21507		-1.88707
732	73.2	517.952	487.309		128.483		6.62203		0.0588097		-3.74343
733	73.3	515.333	487.309		150.651		7.94102		0.0720653		3.13235
734	73.4	487.714	487.309		107.049		5.59169		0.784686		8.93404
735	73.5	491.667	487.309		102.357		5.63991		-0.911806		15.8928
736	73.6	445.714	487.309		186.571		9.5041		0.00575065		0.196078
737	73.7	368.619	333.18		222.118		10.3934		0.175716		-4.15987
738	73.8	321.619	333.18		238.129		12.3144		-0.183378		-0.54513
739	73.9	306.524	333.18		174.793		8.73195		-0.182251		1.50704
740	74	365.286	333.18		98.7717		5.90454		0.238911		-1.79464
741	74.1	331.095	333.18		124.635		6.15296		0.349997		-6.32887
742	74.2	409.714	487.309		82.1205		4.77697		0.29027		-2.29321
743	74.3	481.571	487.309		87.9948		5.19148		1.26963		-3.54773
744	74.4	320.095	333.18		73.4227		4.69893		-0.298533		-0.7315
745	74.5	349.571	333.18		101.402		6.79664		-0.00813084		3.36892
746	74.6	344.762	333.18		103.907		5.56897		-0.286111		0.609531
747	74.7	341.429	333.18		122.026		6.06346		0.181278		-2.71263
748	74.8	324.238	333.18		280.19		11.0234		-0.499776		-0.825106
749	74.9	343.762	333.18		176.168		10.2313		-1.17973		0.594741
750	75	333.238	333.18		86.3839		4.43358		1.08705		-1.64863
751	75.1	349.333	333.18		98.8707		5.15406		-0.656703		1.93171
752	75.2	475.619	487.309		151.138		7.85326		-1.63903		-6.19389
753	75.3	554.952	487.309		64.3208		4.17034		0.376121		-0.617637
754	75.4	585.19	487.309		190.171		8.74367		-0.235881		-0.0356904
755	75.5	501.905	487.309		52.987		2.88		0.410065		3.98127
756	75.6	503.333	487.309		106.012		5.73626		0.551744		0.45696
757	75.7	481.095	487.309		169.348		8.26596		-0.164784		-4.607
758	75.8	349.524	333.18		85.3579		5.08634		-0.732569		0.716773
759	75.9	319.524	333.18		100.538		5.71788		-1.45084		-4.00583
760	76	318.619	333.18		125.329		7.41341		-0.0551183		0.332896
761	76.1	443.381	487.309		169.533		9.32662		0.203376		3.61544
762	76.2	319.143	333.18		149.689		8.22939		0.352125		0.0925608
763	76.3	342.857	333.18		170.489		8.39346		-0.201948		-2.40549
764	76.4	315.143	333.18		84.1385		5.01456		-1.16923		0.26943
765	76.5	301.333	333.18		114.984		6.46527		-0.41875		-1.43638
766	76.6	319.429	333.18		181.828		9.02117		0.136023		-4.04395
767	76.7	353.524	333.18		178.155		9.80434		1.86705		3.12896
768	76.8	345.238	333.18		195.037		9.28562		-0.633884		0.691558
769	76.9	320.619	333.18		146.131		9.29201		0.425359		-0.312713
770	77	331.952	333.18		146.001		5.71181		-0.472127		0.334008
771	77.1	324.762	333.18		195.783		9.52425		0.434338		-6.40043
772	77.2	329.333	333.18		96.1924		5.05913		0.984966		-5.69491
773	77.3	390.714	333.18		146.688		6.64495		-0.495713		0.500338
774	77.4	326.524	333.18		107.757		6.25153		1.344		2.20479
775	77.5	335.667	333.18		152.566		7.54353		-0.0651551		-1.35587
776	77.6	321.524	333.18		151.122		7.04219		-0.158347		-0.785601
777	77.7	314.857	333.18		186.233		9.2629		0.123225		-0.748683
778	77.8	329.143	333.18		136.625		7.39489		-0.459687		2.22491
779	77.9	346.571	333.18		115.456		5.43504		2.13008		-1.17471
780	78	321.905	333.18		107.045		6.14028		4.6776		-6.86276
781	78.1	333.333	333.18		127.095		7.5289		-0.639982		-0.630395
782	78.2	331.714	333.18		155.086		8.38908		-0.822854		-2.81831
783	78.3	356.048	333.18		163.427		5.90142		0.345428		0.648562
784	78.4	363.857	333.18		183.516		6.732		-1.16346		-1.04938
785	78.5	337.143	333.18		148.226		7.4511		0.695447		-4.09075
786	78.6	336.952	333.18		309.517		12.4777		-0.0459074		0.492104
787	78.7	336.286	333.18		150.357		7.50407		-0.161523		2.30148
788	78.8	345.571	333.18		126.133		6.69991		0.667458		-3.42254
789	78.9	322.381	333.18		191.379		9.23203		0.038909		-1.56088
790	79	326	333.18		87.5628		4.56356		3.98773		-4.99513
791	79.1	321.619	333.18		182.203		9.77465		0.862618		-0.785123
792	79.2	305.81	333.18		107.966		5.76676		0.718306		0.193568
793	79.3	329.476	333.18		107.835		6.56007		1.54963		0.619722
794	79.4	467.571	487.309		128.961		7.48007		-0.643375		-1.11436
795	79.5	433.286	487.309		141.916		8.26891		0.36395		-2.45082
796	79.6	471.81	487.309		91.9498		5.00035		0.42879		-1.08845
797	79.7	489.762	487.309		235.221		11.1997		-2.44161		1.59248
798	79.8	519.095	487.309		115.511		6.15459		-0.672111		-0.0290441
799	79.9	486.667	487.309		191.152		9.007		0.329639		5.85194
800	80	501.19	487.309		159.691		8.00358		-0.806111		1.20677
801	80.1	494.81	487.309		112.566		5.99666		0.279376		0.0310243
802	80.2	503.19	487.309		191.518		9.16444		0.0049872		5.82562
803	80.3	497.429	487.309		179.477		8.47328		0.243667		2.24179
804	80.4	486.524	487.309		143.012		4.90006		-0.200105		-0.349118
805	80.5	459.857	487.309		163.957		8.71998		-0.488581		-0.315971
806	80.6	465.333	487.309		242.926		11.4748		0.3355		-0.1374
807	80.7	495.81	487.309		218.174		9.95921		0.300086		-1.26645
808	80.8	330.333	333.18		191.413		6.51161		1.32262		-0.263238
809	80.9	321.286	333.18		169.866		8.79711		0.0765904		-3.03135
810	81	341.762	333.18		181.23		9.38468		-0.309278		0.700884
811	81.1	321.333	333.18		102.062		6.38138		-1.00444		0.368363
812	81.2	343.857	333.18		123.637		5.78161		0.98771		-1.46657
813	81.3	314.619	333.18		169.206		8.75319		0.309158		-0.170384
814	81.4	304.667	333.18		212.205		10.5273		-0.800993		-1.39901
815	81.5	397.048	487.309		171.367		8.37708		-0.3282		1.24632
816	81.6	453.81	487.309		177.148		7.35864		0.487363		-3.09045
817	81.7	341.286	333.18		173.568		9.49425		0.188076		-2.71893
818	81.8	456.571	487.309		178.978		8.68653		-0.424919		-0.513802
819	81.9	470	487.309		93.7083		4.95009		-0.715118		-2.79299
820	82	497.286	487.309		57.0684		3.48265		0.70819		-1.96508
821	82.1	455.095	487.309		123.026		7.16772		-0.79915		3.61463
822	82.2	488.048	487.309		132.852		7.15808		-0.714116		1.45211
823	82.3	503	487.309		130.628		6.15863		0.236549		1.43056
824	82.4	444.429	487.309		231.621		9.81646		6.20003		-0.815784
825	82.5	449.381	487.309		186.806		9.06484		-0.328513		2.13145
826	82.6	457.19	487.309		96.7145		5.06786		-0.163006		5.03842
827	82.7	347.286	333.18		146.823		6.41083		0.0513543		5.29262
828	82.8	291.667	333.18		249.051		14.1322		0.239396		0.168523
829	82.9	311.048	333.18		180.883		7.32175		-0.0757124		-0.621634
830	83	317.762	333.18		241.675		12.7796		0.0460235		-0.154674
831	83.1	326.095	333.18		266.886		14.0856		2.16839		1.31001
832	83.2	331.667	333.18		129.174		5.72364		1.32397		-1.27757
833	83.3	312.952	333.18		174.113		9.04746		-0.346598		-0.845277
834	83.4	307.19	333.18		71.5007		4.6005		-0.711126		-2.70191
835	83.5	345.429	333.18		103.628		6.05927		0.808768		-7.95779
836	83.6	345.048	333.18		156.433		8.38541		-0.0513055		-3.22777
837	83.7	325.524	333.18		95.1368		3.9098		1.0397		8.05555
838	83.8	309.286	333.18		160.346		6.76063		-0.146229		-0.499515
839	83.9	314.857	333.18		266.923		11.8887		0.138545		1.0458
840	84	336.81	333.18		127.116		6.41229		0.0483624		6.32756
841	84.1	309.952	333.18		126.932		6.36907		-0.0195995		0.564308
842	84.2	299.381	333.18		108.416		5.06946		-3.89897		-3.01092
843	84.3	326.333	333.18		105.249		4.59039		0.672571		-2.57974
844	84.4	314.524	333.18		96.3842		4.93052		-0.431261		0.633242
845	84.5	344.81	333.18		91.6249		5.11749		-0.187006		5.68852
846	84.6	307.667	333.18		93.9453		4.74431		-0.58294		-4.68891
847	84.7	326.476	333.18		159.962		7.81996		0.411793		-11.7717
848	84.8	364.714	333.18		72.8317		2.02356		0.405398		1.0194
849	84.9	307	333.18		193.366		5.41548		-0.0705489		10.3103
850	85	318.81	333.18		206.551		3.88945		-0.996875		1.72331
851	85.1	343.476	333.18		161.603		3.1722		0.694009		8.06205
852	85.2	347.19	333.18		530.108		4.79011		0.319793		5.81192
853	85.3	338.238	333.18		656.446		10.9084		-0.241956		-2.58194
854	85.4	335.19	333.18		210.084		4.59411		-0.0890923		-3.40187
855	85.5	373.762	333.18		466.751		7.31194		-0.412706		4.10301
856	85.6	350.762	333.18		183.85		3.17773		0.231092		-3.79085
857	85.7	339.095	333.18		203.688		3.93046		0.0150263		2.62829
858	85.8	341.143	333.18		218.849		4.03072		-1.46423		0.0720987
859	85.9	302.19	333.18		165.755		2.8065		0.29326		0.759291
860	86	330.952	333.18		210.097		4.98279		-0.159943		-0.217011
861	86.1	302.143	333.18		330.152		7.40867		-2.07522		-7.79449
862	86.2	336.619	333.18		199.167		3.54448		0.229722		3.54407
863	86.3	301.857	333.18		310.505		5.43458		1.56042		4.47068
864	86.4	325.714	333.18						0.321462		1.21199
865	86.5	335.667	333.18						-1.10717		0.797489
866	86.6	295.381	333.18						2.41829		-2.81644
867	86.7	337.81	333.18						0.0632162		8.15544
868	86.8	343.524	333.18						0.539439		0.204105
869	86.9	307.952	333.18						-0.210097		-1.87118
870	87	319.524	333.18						1.00393		-2.35905
871	87.1	349.429	333.18						-0.461491		3.38013
872	87.2	303.905	333.18						-0.270399		3.98383
873	87.3	328.524	333.18						0.12945		1.36134
874	87.4	353.286	333.18						0.0672246		-4.24125
875	87.5	325.524	333.18						0.140989		3.20295
876	87.6	303.286	333.18						7.14561		-4.03672
877	87.7	326.667	333.18						-1.47134		-2.17576
878	87.8	321.381	333.18						4.26314		-0.849348
879	87.9	336.619	333.18						2.04545		-4.72114
880	88	336.857	333.18						-0.691723		3.40552
881	88.1	337.81	333.18						-0.920134		3.71356
882	88.2	354.81	333.18						-1.27138		-0.285907
883	88.3	346.095	333.18						-0.326402		-0.42153
884	88.4	353.238	333.18						-1.34762		-2.70751
885	88.5	350.19	333.18						-1.83725		3.41662
886	88.6	337.143	333.18						-1.57332		-1.93088
887	88.7	321.667	333.18						0.828605		-5.79694
888	88.8	336	333.18						1.31734		-4.70561
889	88.9	350.333	333.18						1.0582		1.54103
890	89	325.19	333.18						0.675484		-1.33799
891	89.1	356	333.18						-0.367743		8.99481
892	89.2	333.857	333.18						-1.62572		7.26812
893	89.3	314.714	333.18						1.06769		6.26755
894	89.4	335.714	333.18						-3.28659		2.669
895	89.5	331.381	333.18						-0.759215		1.24751
896	89.6	298.524	333.18						-1.67876		-1.46766
897	89.7	313.19	333.18						0.392483		-0.583906
898	89.8	335.286	333.18						-0.0837639		1.62633
899	89.9	532.714	487.309						0.641735		0.446899
900	90	546.238	487.309						0.34668		-2.50311
901	90.1	563.476	487.309						-1.06017		-1.04498
902	90.2	536.286	487.309						-0.703253		-5.26306
903	90.3	632.762	487.309						1.08277		-3.75839
904	90.4	573.429	487.309						0.643922		-1.10947
905	90.5	552.429	487.309						-0.445878		-2.7035
906	90.6	555.143	487.309						1.03343		7.81892
907	90.7	422.381	487.309						1.03647		6.48777
908	90.8	542.619	487.309						-0.436105		-5.68788
909	90.9	493.905	487.309						-1.09555		7.62828
910	91	579.048	487.309						1.2284		-3.84448
911	91.1	542.143	487.309						0.642354		5.11514
912	91.2	559.19	487.309						0.53617		5.7049
913	91.3	553.714	487.309						-0.958255		6.67703
914	91.4	523.476	487.309						0.824604		0.712106
915	91.5	604.238	487.309						0.540679		2.04976
916	91.6	616.571	487.309						-0.337164		-5.222
917	91.7	595.619	487.309						-0.307108		-4.18352
918	91.8	590.905	487.309						0.310534		-4.61399
919	91.9	589.952	487.309						-0.973476		-4.52207
920	92	569.571	487.309						1.42185		-5.05403
921	92.1	332.143	333.18						0.390726		4.0413
922	92.2	340.667	333.18						-0.996171		0.181262
923	92.3	325.381	333.18						2.26525		-5.17166
924	92.4	323.238	333.18						-0.870402		-7.09417
925	92.5	339.286	333.18						-0.483841		-6.32758
926	92.6	307.238	333.18						-0.287758		0.358086
927	92.7	328.762	333.18						-0.0509429		1.48895
928	92.8	344.667	333.18						-0.46759		-1.435
929	92.9	364.048	333.18						0.170115		-5.01893
930	93	338.048	333.18						-0.352358		-4.48216
931	93.1	312.81	333.18						1.13073		-0.590612
932	93.2	331.048	333.18						-1.24115		-0.0628077
933	93.3	371.476	333.18						0.952618		4.79661
934	93.4	351.286	333.18						-0.375295		6.36431
935	93.5	333.19	333.18						-0.903911		-3.04663
936	93.6	324	333.18						-0.602865		0.42692
937	93.7	326.81	333.18						0.30489		1.51189
938	93.8	327.762	333.18						0.379556		-4.31362
939	93.9	331.286	333.18						0.0161591		-4.66477
940	94	321.762	333.18						0.0462517		-5.88753
941	94.1	324.952	333.18						-1.14133		-4.07627
942	94.2	396.762	333.18						0.281959		-1.94571
943	94.3	323.667	333.18						1.37951		2.40826
944	94.4	313.19	333.18						-0.345486		-1.83723
945	94.5	467.857	487.309						-1.35001		5.04202
946	94.6	497.333	487.309						-1.35701		3.2151
947	94.7	322.571	333.18						-1.7279		1.44454
948	94.8	336.667	333.18						3.54299		6.3428
949	94.9	341.476	333.18						-0.516278		14.3495
950	95	334.095	333.18						0.700085		7.44093
951	95.1	314.143	333.18						-0.428759		0.244464
952	95.2	316.952	333.18						-0.51744		8.8581
953	95.3	292.905	333.18						0.547075		6.49779
954	95.4	325.619	333.18						-0.896861		-1.32699
955	95.5	334.095	333.18						0.439226		-5.9442
956	95.6	305.667	333.18						-1.01221		-2.75346
957	95.7	355.238	333.18						-1.1886		4.44046
958	95.8	343.81	333.18						0.793632		4.37373
959	95.9	328.143	333.18						0.299119		-8.1261
960	96	458.571	487.309						-0.548625		-2.63868
961	96.1	546.048	487.309						0.627829		0.31942
962	96.2	337.905	333.18						0.595163		1.05496
963	96.3	313.714	333.18						-2.97154		-3.64712
964	96.4	346.857	333.18						0.138789		0.722285
965	96.5	341.857	333.18						0.0792712		-1.26742
966	96.6	324.952	333.18						1.09354		1.65128
967	96.7	344	333.18						0.578983		0.394939
968	96.8	423.714	487.309						-1.09454		-2.03647
969	96.9	322.619	333.18						1.13877		-0.41045
970	97	337.238	333.18						0.0652219		-0.54664
971	97.1	342.952	333.18						-0.413185		0.0757697
972	97.2	333.333	333.18						0.187958		1.15088
973	97.3	316.905	333.18						-0.55362		1.69746
974	97.4	359.19	333.18						-0.0795553		1.29697
975	97.5	328.714	333.18						0.0200502		-0.0875882
976	97.6	342.429	333.18						-0.0354826		-5.01353
977	97.7	347.095	333.18						0.0347743		-1.65799
978	97.8	331.381	333.18						1.32222		-1.96977
979	97.9	329.905	333.18						0.232523		-4.63913
980	98	344.333	333.18						0.582628		-1.82797
981	98.1	324.476	333.18						-1.15619		-9.962
982	98.2	322.905	333.18						0.572745		-1.57872
983	98.3	319.238	333.18						-0.384031		-0.362471
984	98.4	307.19	333.18						1.01213		2.36345
985	98.5	350.429	333.18						0.343384		3.53758
986	98.6	554.381	487.309						-0.348908		-0.26852
987	98.7	344.333	333.18						0.797977		0.373096
988	98.8	332.905	333.18						-0.43417		3.3247
989	98.9	421.667	487.309						-0.386786		-3.10706
990	99	463.524	487.309						0.0640331		4.12814
991	99.1	320.571	333.18						0.314895		2.55944
992	99.2	346.476	333.18						-0.170778		0.298966
993	99.3	354.857	333.18						-0.0440011		1.77624
994	99.4	344.048	333.18						1.46098		2.44286
995	99.5	359.286	333.18						-0.192789		-1.70089
996	99.6	319	333.18						0.0292205		0.110537
997	99.7	336.905	333.18						0.534627		-2.23931
998	99.8	310.952	333.18						2.29886		0.749787
999	99.9	338.524	333.18						-0.343879		2.56163
1000	100	363.095	333.18						0.156048		1.61952
									-0.0920635		-6.75732
									-0.231459		1.07212
									0.456733		0.215383
									-1.03149		-2.12875
									-1.51034		-0.913688
									0.0173695		0.35387
									-0.445346		1.56603
									0.19911		-1.29135
									0.0548092		-2.11344
									-0.2057		4.08359
									0.529677		-4.03259
									-0.22265		-4.03755
									0.386694		-8.05695
									0.119437		-0.205354
									2.37367		4.37221
									-0.665073		-1.97648
									0.386732		1.20555
									-0.632461		2.27818
									0.561531		3.68615
									0.603032		-5.47326
									-0.101946		-2.86903
									0.137554		3.54521
									0.0524545		16.9875
									-0.61238		-10.8379
									-2.91486		5.74296
									0.0197178		-8.59023
									-0.192031		-9.7711
									0.283369		-5.18214
									0.379837		-6.3898
									-0.488125		3.4821
									0.0683508		5.84546
									0.698625		16.917
									0.0999028		-10.8809
									-0.677586		23.3377
									0.0302155		3.23607
									0.0872986		-16.3289
									-0.572158		2.63838
									-1.98126		13.81
									0.0579268		-8.5222
									-0.898686		5.87279
									0.301509		5.77883
									2.58148		0.45612
									0.0116964		-13.0473
									-0.957166		-6.52103
									0.258171		-11.7058
									-0.152823		7.18392
									0.0195322		14.0101
									-1.45307		3.65697
									0.62544		3.79441
									0.741456		-1.7255
									-0.138436		3.44155
									-0.422118		-3.98409
									1.18139		1.48324
									1.14915		-7.06872
									0.610364		-3.37802
									-0.642239		-3.44589
									1.01117		-8.96204
									-0.683182		-1.09584
									0.264603		3.56151
									0.123574		14.2235
									-0.671614		9.81487
									0.416444		-1.90412
									-0.473232		2.91082
									-0.712894		-1.79581
									0.420398		1.01373
									-3.849		-5.49206
									2.07169		-5.42814
									-0.0337192		-2.88269
									0.503227		4.58833
									-6.44139		1.72597
									-0.781829		2.72681
									4.26407		2.02459
									-1.94291		3.52881
									0.705906		1.31601
									-0.709421		4.83733
									-3.51497		6.6448
									0.578654		2.95532
									-3.24033		4.04402
									0.723037		6.76788
									3.51036		-2.93195
									-3.98613		6.21609
									-4.43315		-8.52504
									1.62185		-1.95728
									1.07788		-1.41208
									-0.555528		-1.17644
									-0.401846		-6.91324
									-1.33259		-1.36338
									2.79742		-4.07903
									0.656404		-4.94074
									1.62017		-3.41373
									0.499257		-2.41687
									1.07543		3.32514
									4.31793		6.64885
									1.49899		2.76291
									0.232448		4.23419
									0.219821		1.09105
									1.44899		7.73483
									1.34841		1.83014
									-0.935603		-1.46058
									-0.698959		2.32027
									4.45607		4.50333
									-0.360931		1.2253
									-0.817475		-0.118791
									-5.51177		1.91636
									1.62847		-0.12001
									2.29173		-0.564915
									4.08597		-1.33412
									1.96043		0.242965
									-0.752103		-2.55714
									-0.288687		3.21533
									0.903682		3.24085
									-2.52221		-0.510711
									-1.71137		-7.26135
									3.09446		-3.36767
									7.06787		-2.32121
									6.14451		-4.22461
									-0.847509		-5.15374
									3.46703		-8.806
									-6.97388		4.76866
									-2.26796		-3.55652
									-3.88447		-8.34058
									-0.0654882		-0.336092
									1.75096		0.00434203
									-1.76759		-19.7766
									4.14732		-0.357402
									5.88246		1.4747
									2.34768		-0.74967
									-4.37773		3.20879
									1.20744		-4.83658
									-3.27833		3.52303
									1.48924		-5.1892
									-0.862443		1.38347
									0.81425		-2.03533
									-0.356222		1.94215
									3.45835		-3.10518
									4.07608		1.46594
									3.26024		3.02379
									2.96309		2.37819
									0.733997		-3.51275
									1.04405		-2.31072
									2.36039		0.913106
									2.98876		-0.778507
									1.53984		2.10513
									-0.371301		2.26406
									-3.27627		-0.231877
									0.834588		-5.23832
									1.83149		-2.38505
									-0.162385		-0.981331
									0.428155		1.80301
									-4.37074		-1.3704
									0.952286		-0.633601
									-0.60561		-6.49209
									-1.97303		-3.05984
									1.35408		-2.39328
									-0.927265		0.0664471
									-0.476969		-2.18831
									-1.09717		0.100539
									-0.87716		-1.92945
									0.304785		-5.48946
									-0.172168		1.65351
									0.216139		1.73324
									-0.415807		0.668793
									4.70663		15.6757
									0.497829		-1.9851
									-0.865919		-6.67321
									-0.575411		-0.78169
									4.46922		2.4074
									1.81947		0.255691
									1.21466		-0.439938
									2.15288		-9.62148
									-2.16488		3.4091
									-0.896287		0.642271
									2.29931		-0.601425
									-0.243533		10.0275
									-0.262684		-3.55462
									2.0077		-0.18681
									0.824113		3.02392
									-2.30671		0.518575
									-1.15002		-1.99596
									1.43454		-1.99315
									0.775243		0.0787306
									3.04452		1.081
									2.30405		2.39672
									-5.48011		0.216891
									2.36827		-1.43444
									-3.43391		-1.88542
									2.11321		-1.79288
									-7.97509		-3.98643
									-2.0584		-3.25741
									-0.280369		0.939991
									0.965274		-7.56062
									4.88005		-3.27543
									2.40971		0.374911
									6.02257		-9.0375
									0.180151		-5.94307
									-0.178588		-2.92627
									3.50148		1.14463
									-0.224558		12.6177
									3.21696		0.760003
									-2.35438		3.96305
									-4.56987		3.07274
									0.538588		0.852953
									0.0324348		4.18257
									-1.27366		-0.850126
									-0.7411		-10.0826
									3.36359		5.55005
									0.105424		-8.28965
									1.26151		2.83336
									0.294314		1.74296
									0.140332		-3.14812
									-1.33968		6.69543
									-0.155641		7.58269
									0.669141		-5.75443
									2.32845		-13.2368
									3.02119		3.02603
									3.43894		8.59161
									2.2853		-0.716028
									-0.491012		-3.25865
									-1.21585		1.38478
									-0.391839		-3.44644
									8.24342		4.90212
									-0.306396		-12.7937
									0.166354		0.319907
									1.85803		-0.217138
									1.70448		-0.874855
									-1.51409		7.75015
									5.05115		-1.49926
									0.356754		-1.28269
									-0.574899		-0.400697
									-1.51454		11.4156
									-1.05137		4.66755
									-1.22975		-9.06425
									-0.331159		-8.59491
									0.0539956		3.70998
									1.00497		1.60439
									-1.78422		3.79836
									0.211123		-2.37175
									-1.60447		1.47066
									-0.360285		-0.473341
									-0.716314		2.82591
									-2.49939		2.08116
									-0.331159		1.79877
									1.15734		0.79406
									-0.496915		-5.65298
									1.40472		-0.908591
									-0.223697		-0.806396
									-2.26866		-3.92923
									-0.448114		-3.04565
									-0.711111		-0.0566628
									0.172097		1.24927
									-1.96227		-1.93416
									-0.131045		-4.22828
									1.21521		0.716197
									-2.00477		-6.36093
									-2.33538		6.24809
									0.473834		5.05069
									0.379801		6.01355
									0.287751		-7.38216
									0.119925		2.40868
									1.50672		-3.34247
									-3.90637		6.2505
									0.767929		-5.24601
									-0.0203137		-3.37575
									-0.187874		0.447983
									1.44088		0.832647
									-0.472161		6.02501
									0.148043		-3.04113
									1.78229		6.87778
									2.33287		-0.974672
									-2.52752		3.86862
									5.51374		3.6741
									1.59114		1.6683
									-0.354071		-0.286071
									-2.93367		-6.91433
									4.22637		0.939385
									3.74518		-5.44656
									0.856198		2.28796
									6.35805		-2.92533
									4.68674		-2.57146
									3.60273		1.99411
									7.66428		-2.28236
									0.949506		-6.94133
									1.37331		-4.07127
									4.86963		-1.47704
									10.4501		-0.916656
									2.00154		-4.80196
									2.15602		2.01287
									-0.647176		-3.41214
									1.75228		1.92189
									1.30604		1.04239
									1.31633		3.03904
									1.18384		2.48708
									1.35432		-1.82855
									3.36151		-1.48019
									0.565047		2.49733
									-4.68577		2.38741
									1.20768		-4.18225
									-2.52913		-1.288
									-0.268091		-3.38007
									2.06926		2.75945
									1.09936		0.1305
									2.64006		1.35295
									0.707258		-0.878477
									3.06863		-5.98352
									0.352619		-7.84542
									-0.390873		-2.09347
									0.26706		0.712352
									-0.109488		3.34922
									1.34422		-7.88588
									0.0630832		-7.82246
									0.23206		-7.65561
									0.321612		-9.58872
									2.44403		-6.24716
									4.09459		-3.21306
									0.0763431		-3.04301
									1.34949		7.18105
									-0.0371698		-1.41642
									-2.82505		8.22786
									0.696546		3.47139
									-1.57181		-1.13404
									-6.06071		2.84875
									-0.912384		3.32829
									-1.02361		1.36969
									-0.98203		-1.05045
									-2.37209		8.11139
									0.846524		-6.01065
									0.683101		-1.81638
									0.551416		-6.26979
									-1.24822		-7.70061
									-0.0905086		-4.73481
									1.64375		-2.05545
									-1.93284		8.20943
									2.78633		-6.37033
									3.55653		-2.89498
									2.5161		2.2301
									2.09177		1.64337
									-0.861361		-3.99052
									1.74542		-1.51005
									-3.78697		-0.111527
									1.90458		-0.860353
									-1.39373		-7.37673
									-1.51601		-2.00219
									1.31355		-0.448213
									-2.49268		1.89655
									3.33341		1.46986
									0.363561		2.59451
									0.500462		-1.62059
									4.38649		0.817074
									-0.139351		1.69754
									-0.536345		2.81138
									1.87908		0.464812
									2.16129		-4.35825
									2.40597		1.86474
									0.183667		-0.142875
									2.22424		-0.425407
									-0.173641		0.763365
									0.0365939		-2.91199
									-1.22249		-5.14143
									-0.653213		0.951005
									2.06081		-1.73722
									-1.79179		3.47616
									-0.301729		0.728888
									2.47063		-0.00383937
									-4.44888		-4.66921
									-0.0464402		-0.0483066
									2.33062		-3.41645
									1.64029		-4.38071
									-1.8517		1.30038
									0.938247		1.89424
									2.8451		6.77725
									-7.26227		2.39291
									-0.678151		6.52927
									0.515637		-1.67827
									-1.14314		-5.65912
									1.39933		0.361707
									-2.28673		3.28094
									0.559221		1.02174
									-2.22812		-5.14143
									-0.990407		-3.11097
									0.615662		37.6094
									1.03582		5.16013
									-1.24474		-1.9341
									-7.23624		-1.39421
									-3.7556		-2.08901
									-0.987193		2.39127
									-9.04957		-4.29293
									-5.34479		12.7722
									4.55326		-1.22585
									-1.85318		-6.55225
									7.34588		-3.98279
									4.23308		8.34039
									-2.75941		5.29058
									2.62273		1.65642
									0.222417		0.109984
									2.98026		-9.7292
									0.00382977		-3.22821
									3.81882		3.35248
									-3.8534		-0.939143
									-0.369014		-1.10619
									1.86943		-6.28039
									0.96768		-4.41308
									5.44576		3.76807
									1.23332		1.426
									1.23094		-4.23447
									1.42319		1.40031
									0.673466		0.439723
									1.72137		-2.9631
									0.894658		-3.27585
									-1.17329		-0.0293669
									-0.568527		3.88069
									-1.66852		0.0811241
									-1.67086		0.953925
									1.38199		1.21353
									3.41084		0.563201
									0.612875		0.500048
									1.90356		-0.857217
									1.70928		-0.457256
									-1.41024		-0.665076
									-0.735283		-2.52976
									-0.464859		2.97969
									-0.933386		1.92487
									-2.55968		-0.0343826
									4.04167		-0.85234
									-0.876545		1.1487
									0.823697		4.05471
									-0.941303		-1.1312
									2.81713		-1.55396
									-0.609339		-2.20068
									0.832286		-0.261015
									-1.02893		1.57243
									0.771157		5.83293
									-0.63644		2.27871
									2.97995		-1.20293
									1.87403		0.68742
									3.84798		1.02135
									-4.30382		-4.54116
									2.29174		11.9441
									0.196254		0.252642
									0.631434		2.51491
									-2.09936		2.96631
									-0.791028		-0.335504
									-0.255497		-0.292745
									-0.638885		0.492847
									5.5545		-4.28757
									1.93465		1.13206
									2.37227		-2.49991
									-0.268764		-1.16713
									-3.00865		-2.15726
									0.733588		-3.18639
									-0.456517		-0.250831
									-0.228739		8.53841
									-0.821027		-1.02145
									-0.657369		2.19874
									1.86384		-0.00761493
									-2.09279		-2.59299
									3.22532		-3.18407
									1.5156		2.0487
									5.70679		3.1312
									0.0126217		-1.09966
									-2.03356		-1.16322
									1.04947		-1.55054
									-0.208871		-1.41725
									2.29826		-4.75769
									0.371062		-4.42556
									0.30089		-4.20569
									2.93437		-0.0915598
									1.85576		-0.0180173
									2.03669		0.641649
									-0.359805		-1.27027
									0.367551		3.14534
									1.49443		1.58481
									0.934631		9.39492
									0.496789		-3.93296
									-0.669692		-1.4055
									1.203		-0.305816
									-0.682933		-1.90545
									-0.936694		-5.04151
									2.50668		-4.6812
									1.36521		-0.0895406
									-1.22378		5.07694
									-0.65844		5.89974
									1.31938		-6.05963
									-1.71426		-7.10514
									5.67487		-1.17276
									4.02861		0.393408
									0.745007		2.37944
									6.99517		-1.65733
									-0.440795		-5.44999
									0.042284		-7.60136
									-2.20749		-1.86424
									-1.31684		-8.41968
									0.19117		3.32288
									-2.42918		3.63615
									0.609311		3.13372
									1.23938		0.6473
									0.821151		-4.8282
									0.19927		3.96005
									-1.6277		0.167481
									1.04225		-0.874615
									-2.22481		-0.795458
									-0.764389		19.2927
									-0.426248		-4.3644
									-1.58773		-0.526893
									-2.164		0.0881675
									-1.84287		0.891829
									-0.607403		1.50344
									-1.71389		1.63412
									-0.952666		-1.6365
									-0.470571		1.91215
									-0.0562445		-1.16519
									2.03696		0.645214
									1.81471		1.36677
									0.428179		-0.0351858
									-0.876083		-0.599726
									-1.43332		4.28217
									1.43387		-7.69524
									4.68157		2.64331
									4.69425		-0.474911
									2.39925		-0.171736
									0.544108		-0.939357
									5.20241		-4.30188
									0.322192		-2.62267
									0.837484		2.2752
									-0.20935		3.79765
									-2.33259		4.10002
									1.63321		1.75077
									-0.540475		-3.61035
									-3.09081		2.88975
									-4.13737		-0.957352
									-0.663586		7.72842
									-0.12068		-2.28814
									-2.3899		-1.84861
									0.491382		-1.88992
									0.87329		2.61998
									1.38412		-0.703392
									-0.884305		-2.36576
									0.428526		-0.0866937
									1.06267		0.0460785
									1.27115		0.605124
									-0.562178		-0.204934
									1.28892		-7.03095
									5.10095		-3.00446
									3.58268		-0.121818
									0.347008		10.221
									0.531909		4.26067
									0.794199		-1.56151
									-0.643981		0.536453
									-3.86937		-0.580069
									-0.604833		1.49073
									0.460364		-1.04947
									-3.96286		1.25925
									-2.37876		-0.557195
									0.618128		0.458839
									-0.105637		-1.11666
									-1.74248		-0.348228
									1.45947		-6.18837
									1.62935		-1.78599
									-0.767629		0.189421
									7.56135		-5.06089
									4.95674		-0.225459
									-0.129258		-1.24778
									1.76439		0.480719
									-1.23814		-2.05752
									-0.0857302		-3.52708
									1.48912		-1.44518
									4.91308		-12.1644
									-2.12602		-8.56666
									2.99649		-5.00033
									-1.19175		10.2488
									1.23382		-2.04093
									-2.19274		-5.05195
									1.79584		10.2765
									-2.08491		-1.03772
									1.09285		7.58786
									-0.990137		-7.51002
									-2.28985		-0.314612
									-3.05722		6.24233
									2.78882		2.87623
									4.00422		-9.02905
									-0.726683		-10.1539
									-1.70439		-8.35153
									1.39744		-6.72561
									1.47598		-3.87291
									-1.55421		1.84251
									-1.64761		-2.45264
									-1.53722		-0.31467
									-4.46185		-2.80788
									0.0962246		7.18004
									-0.285205		4.27426
									0.0966036		3.89268
									-0.847952		-7.8497
									0.372258		2.30489
									-0.63321		10.4237
									-2.92485		2.92731
									0.336701		6.2657
									0.0337811		6.32402
									-0.478593		-8.53985
									-0.0937181		3.7527
									5.32831		-4.37926
									0.26874		-0.163827
									5.46144		-10.1682
									2.68471		-6.50815
									3.98143		-5.88838
									-1.01494		1.53778
									3.03419		-3.11448
									-0.380988		3.20859
									2.66603		5.67505
									1.65015		1.62138
									-2.34134		2.00505
									-2.70214		4.82514
									0.665467		0.078973
									3.22357		-6.13537
									-2.41053		-1.86038
									1.80797		-6.6765
									0.175688		1.576
									-0.689348		0.994496
									-1.87664		4.85353
									-1.11681		-0.427324
									0.128069		3.13329
									-0.438985		2.03791
									4.95484		-7.51089
									0.469352		-4.75831
									-1.90836		-4.78398
									-1.87885		-1.89006
									0.797305		3.03297
									-0.428572		11.3298
									1.60665		-1.43839
									5.60467		-2.047
									-2.78149		-3.20725
									-1.41972		-0.889665
									2.77442		3.77545
									-2.79843		-7.7074
									-1.54034		-7.16065
									4.72762		-2.96856
									4.02018		6.62386
									5.37676		3.88093
									5.49697		7.48016
									5.7398		8.3192
									3.61928		0.453095
									0.734221		0.989227
									0.575593		6.46283
									0.717391		11.7093
									2.98256		0.657937
									3.14685		1.31375
									0.600787		5.73923
									-1.19268		0.0947131
									-0.719849		0.690402
									2.3111		-4.28544
									1.50522		-2.08613
									-2.70686		-2.9463
									2.05006		0.572761
									3.14992		-1.28385
									2.768		3.72214
									2.38536		-0.0725611
									-0.833234		1.47398
									-0.72237		-0.00956178
									-1.14789		0.991865
									1.09339		-2.31166
									-0.297545		3.02753
									-1.21088		-3.3459
									-3.78661		1.02888
									3.63009		-0.904475
									-0.415283		0.391684
									1.14625		-3.05675
									0.204906		0.0264878
									-1.59189		-4.40902
									4.41119		-0.726037
									3.83878		-3.05453
									-0.45164		-1.04155
									-0.00992851		-0.716204
									-1.8204		-2.90228
									-6.42627		-12.3225
									-4.37457		-11.4028
									-0.432102		-0.687083
									-1.87497		3.26532
									0.583021		4.41107
									-1.11885		1.64596
									-4.10336		-0.275862
									-0.0738791		4.56264
									-2.07017		-12.2732
									-1.1476		-3.82689
									2.37302		0.919557
									0.799585		-10.2121
									-1.33674		-5.0969
									-0.72771		-7.97955
									-4.95118		-5.39521
									-4.8416		3.4154
									3.31371		4.54288
									-1.01964		-1.67836
									-0.279744		6.89354
									-0.994753		0.733754
									1.94666		-3.06257
									-1.16475		1.9735
									2.18543		-2.34304
									1.18198		0.510685
									-1.65874		0.14809
									0.266032		-0.725676
									-5.08198		1.25571
									0.0908644		1.61766
									1.04102		2.05968
									1.10423		0.0194887
									1.00817		-0.465319
									-0.469534		-2.76274
									-2.70849		0.677416
									-4.04045		0.309608
									-1.13037		0.753972
									0.144483		-0.528495
									2.13257		-11.2238
									1.72216		5.90167
									0.283737		-12.4801
									-1.24661		4.66686
									-0.588395		2.29727
									2.0193		-3.31169
									5.04139		-1.05131
									0.560199		-11.2838
									1.95576		-0.666344
									-1.53886		1.53382
									0.251996		3.654
									-3.36017		1.69201
									1.23275		2.03972
									-0.550306		-1.05333
									-0.104154		-4.81175
									1.3142		0.369827
									0.0422605		-0.747339
									4.09573		-2.54885
									3.60959		1.15327
									3.61401		2.95667
									3.44896		-2.31748
									4.39761		1.9426
									1.9335		2.29285
									1.28399		-2.71667
									3.76197		6.64737
									3.0614		1.38134
									3.08585		-0.469994
									0.854287		5.34729
									-0.794307		2.22195
									-0.295436		2.19576
									0.986406		2.68629
									1.54298		-11.6852
									-0.114986		-4.15555
									-0.780294		0.15995
									-2.19246		-1.05717
									1.657		-0.606848
									-0.670581		-1.70092
									-1.95049		7.28607
									-1.23525		-6.78417
									-1.37067		-6.38506
									-5.53273		-3.60121
									-1.73515		2.8337
									-2.27117		2.66848
									-5.52404		-1.7207
									0.782568		-3.74562
									-3.83701		3.63613
									-5.58803		-2.66782
									-1.91974		-0.12055
									4.21765		3.43563
									5.53206		-4.08854
									11.9252		-6.13724
									2.10408		1.9838
									-1.42422		-1.25416
									-1.96891		4.33249
									1.8795		-6.31949
									5.95122		9.30707
									-2.39268		-2.12332
									2.5395		10.4477
									-4.3301		-12.4394
									-4.21149		-4.94153
									-0.307923		0.475912
									-4.49639		-10.527
									1.02551		-9.05277
									-0.259953		-10.1987
									-3.52979		-13.2099
									2.6917		-7.0214
									2.56957		-2.94599
									3.26248		-2.99068
									1.46757		-0.111541
									0.549461		-3.79493
									-1.12256		0.858541
									1.80275		2.96919
									5.23957		0.158634
									-3.54363		-8.05332
									1.03315		-5.50435
									-0.638909		-3.51551
									-0.279817		-5.33717
									0.581522		-5.46819
									0.292003		-2.25496
									-3.14509		-7.2083
									1.14939		-1.45153
									0.365192		-4.83053
									2.20836		-5.41217
									-5.33564		1.70153
									-1.1812		7.98286
									1.47048		2.26703
									3.59718		3.99559
									-3.1317		0.0385367
									-4.08409		0.557707
									0.121126		-0.751223
									6.1601		3.28719
									1.01511		-1.82672
									4.83638		1.26804
									-2.44566		-1.87835
									0.633872		-1.27818
									0.80953		-2.11482
									-1.89316		5.41135
									4.6745		-0.593015
									1.53659		-0.608731
									0.152897		0.724487
									-0.640828		-4.49418
									6.04562		-4.58479
									7.67623		3.43406
									-2.27223		-1.15814
									-4.26983		3.19305
									-0.0200962		4.21435
									-0.238617		-3.83944
									2.78594		2.6979
									0.823498		-0.360775
									-1.83593		-1.36138
									-1.88212		0.430671
									3.71771		-1.26483
									0.315715		0.113977
									2.43168		-0.700219
									-0.825572		-3.8792
									0.927482		3.7001
									-0.183491		1.38727
									-3.46583		-0.42905
									-0.426298		-7.1661
									-1.25864		3.09107
									-0.311378		2.29125
									2.03083		-0.489748
									-1.34423		-6.01339
									-0.43728		-2.08518
									7.39364		-1.58753
									0.578144		2.60634
									-2.4096		2.27281
									0.78546		-6.60038
									-1.9089		-5.61799
									-1.97984		-8.07645
									-2.46033		2.42177
									-1.03556		16.0273
									2.69757		-2.3752
									-2.99302		1.16582
									-2.32507		-4.06458
									-0.869108		-4.90998
									-0.317053		3.96522
									5.83445		-4.49078
									2.70635		5.30651
									0.597241		3.29325
									-0.500168		-2.63496
									-0.476318		-2.50169
									-1.18784		-0.873748
									-1.20605		-5.0739
									1.40356		3.90366
									0.247069		1.91403
									0.331937		5.54205
									-2.02223		1.30939
									0.679872		-1.67379
									1.14386		0.975105
									0.223348		-0.937487
									0.912202		2.71673
									0.276413		-0.815851
									-1.56262		-3.65667
									0.738171		-2.34744
									-4.59302		0.726643
									-0.263339		-2.35692
									-0.86058		-5.52979
									-3.10004		0.5003
									3.16682		-2.80775
									-0.719878		-1.4873
									-3.35968		-0.118975
									-0.57276		1.78135
									0.632335		-1.83195
									0.0215273		-2.97444
									-3.23459		0.978934
									1.33458		-1.76602
									-0.949281		0.309777
									-0.0395638		-8.48429
									2.47249		-3.6745
									1.43452		-1.00404
									0.15904		9.62164
									1.72807		-2.45964
									-0.875732		-2.12084
									-1.0593		1.87897
									-5.83367		5.88856
									2.04648		-2.08271
									0.542298		-3.71417
									1.30294		-9.27906
									-0.0169878		-4.61168
									1.13246		0.0258217
									-0.0516095		-6.30035
									-0.385251		2.93733
									0.685716		4.10253
									3.40812		-0.655752
									-0.238878		1.28174
									-0.892311		1.89847
									-1.5002		2.30724
									-4.60606		-12.5321
									-1.38247		-5.02126
									1.42617		1.08211
									1.26595		-0.332411
									-0.391415		-2.7187
									5.90329		0.906521
									4.41481		5.55415
									1.46258		-1.21365
									-5.01764		12.3807
									1.48749		0.382397
									0.84396		3.20783
									0.521619		-2.73076
									-0.628503		1.70944
									1.85082		-4.56007
									0.517786		1.89911
									-0.287491		3.94047
									1.11762		3.49099
									2.8378		1.92528
									-2.70562		-1.522
									-4.35757		-6.68584
									0.0440835		-0.720419
									2.72933		8.46421
									0.0511394		7.76125
									-0.117888		6.15557
									0.46106		-2.74076
									1.17743		-0.502639
									-0.886129		-1.47422
									-1.20319		1.35747
									0.457442		2.52953
									-0.55444		0.791087
									6.61297		2.71643
									4.50302		-2.4049
									-0.100865		1.79181
									3.14691		2.04364
									0.562933		2.012
									0.928868		-0.0647959
									-0.303022		-1.29708
									1.92973		-3.21025
									0.172084		0.497881
									-0.439229		-0.694191
									-1.76409		-0.157492
									-1.56494		1.72654
									-2.15472		-0.828737
									2.41685		1.11255
									-1.17643		-1.47166
									-0.367336		-0.78511
									7.96735		5.24433
									0.333384		3.9704
									0.536487		0.407579
									1.30293		0.73506
									-0.9787		1.43328
									-0.256392		1.50926
									-1.37398		-3.14722
									2.00652		-2.30961
									-1.35937		1.8992
									0.932795		-0.515133
									-0.442191		2.08038
									0.0798605		9.20877
									0.416093		0.755664
									-2.09947		-2.42602
									1.1085		1.68466
									0.350161		-3.63327
									-0.340846		4.21546
									-0.157853		-1.38296
									1.24682		1.35312
									-0.821179		1.49764
									2.704		-2.63917
									1.20509		-0.724253
									1.92052		1.18406
									2.60121		2.88514
									2.32739		-6.38781
									-1.21205		-4.43114
									-0.365128		-1.10432
									1.93526		-3.33653
									0.903234		4.22577
									0.965614		-0.620304
									-0.686616		3.80658
									-2.8785		2.20872
									-3.22452		0.139055
									-4.36222		-2.78898
									-0.263599		-3.13827
									1.9417		0.756836
									0.521531		-7.06841
									0.0928611		-9.57587
									-2.23533		-7.05176
									0.421812		0.675463
									-0.222779		-2.24437
									-2.46697		-2.53851
									1.79666		-0.178606
									0.0214764		-2.0257
									1.72122		-4.16332
									-0.619875		3.92246
									-0.7906		-2.05981
									1.9062		-0.934487
									-3.53892		-3.38
									3.73654		-3.13059
									0.524079		-0.300932
									0.102896		1.51539
									-1.51136		9.12625
									0.561551		2.9405
									-0.626866		10.6859
									1.83673		-7.85878
									3.84775		-0.48927
[truncated: 5,213 more rows]

## Sheet: Figure 3-figure supplment 3 
		DISC						STaSI						vbFRET
Number of States	Signal to Noise	Accuracy		Precision		Recall		Accuracy		Precision		Recall		Accuracy		Precision		Recall
		mean	s.d.	mean	s.d.	mean	s.d.	mean	s.d.	mean	s.d.	mean	s.d.	mean	s.d.	mean	s.d.	mean	s.d.
2	1	0	0	0	0	0	0	0.017209	0.017209	0.0725885	0.0725885	0.0216812	0.0216812	0.045549	0.045549	0.146508	0.146508	0.0617301	0.0617301
2	2	0.331447	0.331447	0.587408	0.587408	0.422916	0.422916	0.187775	0.187775	0.428334	0.428334	0.24503	0.24503	0.338093	0.338093	0.590973	0.590973	0.433957	0.433957
2	3	0.666906	0.666906	0.861379	0.861379	0.740145	0.740145	0.423808	0.423808	0.705515	0.705515	0.509142	0.509142	0.686349	0.686349	0.866821	0.866821	0.760563	0.760563
2	4	0.882225	0.882225	0.963224	0.963224	0.910039	0.910039	0.652268	0.652268	0.866204	0.866204	0.717194	0.717194	0.891391	0.891391	0.962609	0.962609	0.920821	0.920821
2	5	0.957619	0.957619	0.987046	0.987046	0.96862	0.96862	0.778746	0.778746	0.920366	0.920366	0.829502	0.829502	0.965779	0.965779	0.987614	0.987614	0.976639	0.976639
2	6	0.990864	0.990864	0.997522	0.997522	0.992968	0.992968	0.831699	0.831699	0.946291	0.946291	0.869456	0.869456	0.993838	0.993838	0.998362	0.998362	0.995285	0.995285
2	7	0.996591	0.996591	0.999087	0.999087	0.997385	0.997385	0.885926	0.885926	0.966297	0.966297	0.910723	0.910723	0.997269	0.997269	0.999265	0.999265	0.997902	0.997902
2	8	0.998353	0.998353	0.999333	0.999333	0.998958	0.998958	0.911558	0.911558	0.975502	0.975502	0.930786	0.930786	0.998283	0.998283	0.999235	0.999235	0.998984	0.998984
2	9	0.998086	0.998086	0.999484	0.999484	0.998528	0.998528	0.928171	0.928171	0.976129	0.976129	0.947893	0.947893	0.998086	0.998086	0.999484	0.999484	0.998528	0.998528
2	10	1	1	1	1	1	1	0.963897	0.963897	0.989861	0.989861	0.97254	0.97254	1	1	1	1	1	1
3	1	0	0	0	0	0	0	0.00706162	0.00706162	0.0349349	0.0349349	0.00872044	0.00872044	0.0260483	0.0260483	0.0909859	0.0909859	0.0351134	0.0351134
3	2	0.0884217	0.0884217	0.20148	0.20148	0.119316	0.119316	0.120074	0.120074	0.304072	0.304072	0.161582	0.161582	0.321362	0.321362	0.57394	0.57394	0.417459	0.417459
3	3	0.648082	0.648082	0.852838	0.852838	0.725306	0.725306	0.355258	0.355258	0.635172	0.635172	0.440886	0.440886	0.669848	0.669848	0.857218	0.857218	0.750384	0.750384
3	4	0.853355	0.853355	0.948584	0.948584	0.89265	0.89265	0.577362	0.577362	0.813225	0.813225	0.656711	0.656711	0.874763	0.874763	0.950015	0.950015	0.9152	0.9152
3	5	0.945466	0.945466	0.983608	0.983608	0.959756	0.959756	0.708386	0.708386	0.892584	0.892584	0.765885	0.765885	0.957506	0.957506	0.984459	0.984459	0.97155	0.97155
3	6	0.988453	0.988453	0.996835	0.996835	0.991407	0.991407	0.814109	0.814109	0.944283	0.944283	0.852579	0.852579	0.993002	0.993002	0.997409	0.997409	0.995478	0.995478
3	7	0.996381	0.996381	0.998521	0.998521	0.997796	0.997796	0.875453	0.875453	0.964289	0.964289	0.902979	0.902979	0.997771	0.997771	0.999052	0.999052	0.998679	0.998679
3	8	0.999303	0.999303	0.999696	0.999696	0.999595	0.999595	0.916875	0.916875	0.971604	0.971604	0.941105	0.941105	1	1	1	1	1	1
3	9	0.999131	0.999131	0.999237	0.999237	0.999886	0.999886	0.934104	0.934104	0.971802	0.971802	0.957952	0.957952	1	1	1	1	1	1
3	10	0.998816	0.998816	0.999105	0.999105	0.999705	0.999705	0.957579	0.957579	0.984238	0.984238	0.972269	0.972269	1	1	1	1	1	1
4	1	0	0	0	0	0	0	0.00518641	0.00518641	0.0266885	0.0266885	0.00636915	0.00636915	0.023085	0.023085	0.0840132	0.0840132	0.0306254	0.0306254
4	2	0.0494255	0.0494255	0.116503	0.116503	0.0665839	0.0665839	0.0793671	0.0793671	0.222841	0.222841	0.106595	0.106595	0.282895	0.282895	0.523033	0.523033	0.376068	0.376068
4	3	0.599451	0.599451	0.81093	0.81093	0.687708	0.687708	0.268344	0.268344	0.522092	0.522092	0.345427	0.345427	0.653561	0.653561	0.839658	0.839658	0.742749	0.742749
4	4	0.832198	0.832198	0.936665	0.936665	0.877979	0.877979	0.493161	0.493161	0.744508	0.744508	0.582544	0.582544	0.866769	0.866769	0.941805	0.941805	0.914315	0.914315
3	5	0.939519	0.939519	0.97557	0.97557	0.959416	0.959416	0.680403	0.680403	0.875964	0.875964	0.746147	0.746147	0.954996	0.954996	0.977575	0.977575	0.975426	0.975426
4	6	0.983574	0.983574	0.993964	0.993964	0.989302	0.989302	0.775912	0.775912	0.914017	0.914017	0.830142	0.830142	0.954038	0.954038	0.961516	0.961516	0.980126	0.980126
4	7	0.983909	0.983909	0.989789	0.989789	0.992593	0.992593	0.855352	0.855352	0.950359	0.950359	0.891961	0.891961	0.951856	0.951856	0.954954	0.954954	0.980757	0.980757
4	8	0.995619	0.995619	0.996581	0.996581	0.998666	0.998666	0.896103	0.896103	0.955878	0.955878	0.930858	0.930858	0.984309	0.984309	0.984616	0.984616	0.996236	0.996236
4	9	0.99517	0.99517	0.996438	0.996438	0.998243	0.998243	0.93462	0.93462	0.975534	0.975534	0.955226	0.955226	0.993486	0.993486	0.993694	0.993694	0.999789	0.999789
4	10	0.98972	0.98972	0.99193	0.99193	0.996555	0.996555	0.942902	0.942902	0.973012	0.973012	0.966509	0.966509	0.995068	0.995068	0.996448	0.996448	0.998112	0.998112
5	1	0	0	0	0	0	0	0.0027534	0.0027534	0.0156682	0.0156682	0.00333014	0.00333014	0.0133388	0.0133388	0.0505838	0.0505838	0.0176786	0.0176786
5	2	0.0253789	0.0253789	0.064335	0.064335	0.0337314	0.0337314	0.0558541	0.0558541	0.16916	0.16916	0.0751267	0.0751267	0.27285	0.27285	0.51727	0.51727	0.363022	0.363022
5	3	0.570935	0.570935	0.792761	0.792761	0.664466	0.664466	0.211959	0.211959	0.434453	0.434453	0.27994	0.27994	0.627033	0.627033	0.814727	0.814727	0.726869	0.726869
5	4	0.819063	0.819063	0.934266	0.934266	0.866588	0.866588	0.432061	0.432061	0.683209	0.683209	0.53024	0.53024	0.816113	0.816113	0.906504	0.906504	0.887231	0.887231
5	5	0.939754	0.939754	0.97942	0.97942	0.958261	0.958261	0.628345	0.628345	0.840888	0.840888	0.707167	0.707167	0.904688	0.904688	0.939554	0.939554	0.954643	0.954643
5	6	0.966428	0.966428	0.982966	0.982966	0.982241	0.982241	0.729778	0.729778	0.892846	0.892846	0.795885	0.795885	0.918043	0.918043	0.935239	0.935239	0.968711	0.968711
5	7	0.987815	0.987815	0.99308	0.99308	0.994303	0.994303	0.819996	0.819996	0.933762	0.933762	0.86869	0.86869	0.946915	0.946915	0.960016	0.960016	0.98138	0.98138
5	8	0.988077	0.988077	0.991367	0.991367	0.996073	0.996073	0.872073	0.872073	0.95142	0.95142	0.910701	0.910701	0.893993	0.893993	0.906457	0.906457	0.964921	0.964921
5	9	0.990167	0.990167	0.991948	0.991948	0.997977	0.997977	0.921149	0.921149	0.969984	0.969984	0.946923	0.946923	0.942616	0.942616	0.957206	0.957206	0.9787	0.9787
5	10	0.995261	0.995261	0.996513	0.996513	0.998678	0.998678	0.933403	0.933403	0.968296	0.968296	0.962315	0.962315	0.962213	0.962213	0.96967	0.96967	0.987846	0.987846
