# Supplementary material for: Top-down machine learning approach for high-throughput single-molecule analysis
Source: eLife journal article supplement (doi:10.7554/elife.53357), 2020-04-08
Supplement: supp [file elife-53357-supp-v1.zip › elife_poa_e53357_Figure_4_source_data_1.xlsx]

## Sheet: Figure 4a
Summary
Number of Data Points	DISC		STaSI		vbFRET
	mu	s.d	mu	s.d	mu	s.d
100	0.002	0.001	0.005	0.001	0.941	0.135
1000	0.01	0.002	0.07	0.008	8.664	0.619
10000	0.075	0.01	1.671	0.197	79.337	19.605
100000	0.748	0.108	230.85	74.239	955.201	181.335
1000000	11.161	1.955	97275	40009.5	11139	2593.86
Raw Data
Number of Data Points	Analysis Time (s)
	DISC	STaSI	vbFRET
100	0.00259845	0.00515204	0.942272
100	0.00288378	0.00521626	0.765389
100	0.00299668	0.00403976	0.914972
100	0.00670536	0.00749361	0.778266
100	0.0031867	0.00519192	0.851584
100	0.000682383	0.00378111	1.09239
100	0.00193132	0.00352335	1.0874
100	0.00322131	0.00550775	1.00045
100	0.00287381	0.0046242	1.06081
100	0.00264185	0.00575612	1.11331
100	0.000617283	0.0036122	1.06792
100	0.00263921	0.00433124	0.929327
100	0.0021794	0.00434561	0.848904
100	0.000672999	0.00411189	1.03163
100	0.000616989	0.00522154	0.954102
100	0.00239582	0.00531743	0.730564
100	0.000368024	0.00523679	1.13997
100	0.00251165	0.00483709	0.671073
100	0.00311222	0.00455558	1.02818
100	0.000830472	0.00437992	1.01438
100	0.00341397	0.00792761	0.937756
100	0.00418755	0.00498313	0.760075
100	0.000387671	0.00416556	1.07865
100	0.00236356	0.00331515	0.95344
100	0.00388639	0.00830883	0.77425
1000	0.0140336	0.0768958	7.81295
1000	0.00771999	0.0627367	10.2092
1000	0.0103651	0.0638256	9.20572
1000	0.00993459	0.0509392	8.40319
1000	0.00727162	0.0584524	7.93826
1000	0.00868008	0.0769087	8.83551
1000	0.00783084	0.0759278	8.37428
1000	0.00765489	0.0652771	9.03112
1000	0.00790474	0.0771908	9.49948
1000	0.010636	0.0640959	8.76226
1000	0.0105044	0.0692653	8.2574
1000	0.0140749	0.0562355	8.43966
1000	0.0104815	0.0688621	9.33669
1000	0.0115395	0.0721881	8.64826
1000	0.01307	0.0794183	7.99804
1000	0.0132685	0.0733217	8.08253
1000	0.0103489	0.0725907	9.3338
1000	0.00880471	0.0705183	8.04834
1000	0.00815458	0.0826153	8.4984
1000	0.00787922	0.0778861	8.56735
10000	0.0714022	1.69555	81.0574
10000	0.0842481	1.69954	69.694
10000	0.0930197	1.64535	60.9144
10000	0.0690333	1.93392	67.8169
10000	0.0784421	1.86683	68.7117
10000	0.0714825	1.59151	109.503
10000	0.0750193	1.62046	70.762
10000	0.0607673	1.43788	69.4274
10000	0.0776067	1.71037	75.2222
10000	0.0934217	1.6707	67.8825
10000	0.0740519	1.40201	68.1823
10000	0.0576909	1.50567	117.423
10000	0.0720596	2.05795	64.8504
10000	0.0752308	1.37321	120.374
10000	0.0720191	1.85286	78.2312
100000	0.711217	118.735	858.116
100000	0.699687	168.042	772.829
100000	0.716417	266.331	885.374
100000	0.744155	199.033	1281.66
100000	0.746904	235.697	844.304
100000	0.626225	276.678	1189.1
100000	1.02843	316.717	891.164
100000	0.702247	240.659	1158.53
100000	0.708566	141.043	816.945
100000	0.794758	345.56	853.998
1000000	13.9358	72838.3	12531.7
1000000	9.27695	80306.6	8755.59
1000000	11.458	70611.7	13619.9
1000000	11.8437	96021.7	7941.63
1000000	9.29301	166596	12846.1

## Sheet: Figure 4b
Summary Data
	Accuracy
Number of Data Points	SNR = 1		SNR = 3		SNR = 5		SNR = 7
	mu	s.d	mu	s.d	mu	s.d	mu	s.d
10	0.208	0.406283	0.503459	0.486409	0.911643	0.275352	0.94739	0.21927
11.9378	0.124	0.329912	0.476947	0.480256	0.902322	0.285481	0.952867	0.208958
14.251	0.108	0.310691	0.531821	0.468029	0.902935	0.280605	0.943781	0.225646
17.0125	0.07	0.255403	0.579169	0.456579	0.927944	0.239129	0.971667	0.160117
20.3092	0.05	0.218163	0.616641	0.421771	0.913693	0.255372	0.972173	0.156701
24.2446	0.034	0.181411	0.63231	0.39924	0.942163	0.205027	0.974292	0.148906
28.9427	0.014	0.117608	0.692567	0.348593	0.934994	0.204385	0.981733	0.127388
34.5511	0.004	0.0631821	0.695737	0.327845	0.957364	0.149018	0.987343	0.0915347
41.2463	0.008	0.0891734	0.692466	0.301484	0.937712	0.191965	0.984713	0.109871
49.2388	0	0	0.70033	0.275566	0.954522	0.134266	0.992278	0.0701455
58.7802	0	0	0.688086	0.236277	0.960055	0.100889	0.993146	0.0512365
70.1704	0	0	0.691215	0.213846	0.950343	0.107352	0.996723	0.0280982
83.7678	0	0	0.683085	0.195025	0.95119	0.103812	0.996422	0.0258899
100	0	0	0.672429	0.183125	0.945916	0.0925586	0.995639	0.03003
119.378	0	0	0.677685	0.164489	0.951123	0.0849082	0.993505	0.0306032
142.51	0	0	0.680523	0.144879	0.955766	0.0762104	0.996814	0.018017
170.125	0	0	0.672264	0.126973	0.94864	0.067676	0.994926	0.0298876
203.092	0	0	0.658531	0.119401	0.949678	0.0643826	0.995226	0.0215832
242.446	0	0	0.669682	0.108136	0.952004	0.0562107	0.993513	0.042873
289.427	0	0	0.656112	0.100392	0.948377	0.0524774	0.995655	0.0163333
345.511	0	0	0.665662	0.0911364	0.949127	0.0474899	0.995378	0.0263857
412.463	0.000122807	0.00274605	0.661153	0.0796781	0.94978	0.0432794	0.994571	0.034704
492.388	0	0	0.663043	0.0748883	0.951327	0.0401759	0.995476	0.0250158
587.802	0	0	0.660473	0.0708135	0.948049	0.0377666	0.996824	0.00930411
701.704	0	0	0.660733	0.0639058	0.946961	0.0418445	0.995562	0.0246624
837.678	0	0	0.664966	0.0575991	0.948933	0.031768	0.994872	0.0335053
1000	0	0	0.665098	0.0547335	0.948813	0.027599	0.996575	0.00777208
1193.78	9.64467e-05	0.00215661	0.661058	0.0486587	0.94736	0.0262789	0.994916	0.0238303
1425.1	0.000128043	0.00208898	0.659311	0.0442856	0.947833	0.0249511	0.995582	0.0236674
1701.25	0.00056997	0.00489633	0.657252	0.0433343	0.949368	0.0211209	0.994452	0.0324836
2030.92	0.00062114	0.00477919	0.658461	0.0401419	0.948065	0.0205822	0.996746	0.00503247
2424.46	0.0022221	0.00916061	0.661837	0.0359095	0.949529	0.0176008	0.996223	0.00509937
2894.27	0.00351844	0.0112018	0.658565	0.0310613	0.948918	0.0167246	0.993003	0.039596
3455.11	0.00541034	0.0133688	0.658707	0.0280945	0.949339	0.0153543	0.99636	0.00404859
4124.63	0.00916488	0.0164123	0.658225	0.0263541	0.948412	0.0145075	0.996263	0.00403784
4923.88	0.0168249	0.0186654	0.658577	0.0242348	0.949808	0.013289	0.996396	0.00360988
5878.02	0.0256704	0.017834	0.657901	0.0234534	0.948465	0.0114305	0.996197	0.00348452
7017.04	0.0316607	0.0139052	0.658009	0.0190239	0.948515	0.0110221	0.996311	0.00310498
8376.78	0.0346896	0.010251	0.659397	0.0182716	0.94884	0.0098078	0.995131	0.0228474
10000	0.0361086	0.00609458	0.657825	0.0173516	0.949008	0.0090952	0.996154	0.0029171

## Sheet: Figure 4-figure supplement 1
B-Analysis Time vs Accuracy (2 states)								D-Analysis Time vs Accuracy (3 states)
Trajectory #	DISC		STaSI		vbFRET			Trajectory #	DISC		STaSI		vbFRET
	Time (s)	Accuracy	Time (s)	Accuracy	Time (s)	Accuracy			Time (s)	Accuracy	Time (s)	Accuracy	Time (s)	Accuracy
1	0.0158339	1	0.0158339	0.684211	0.0158339	0.333333		1	0.0402367	0.885417	0.0402367	0.70297	0.0402367	0.568345
2	0.0200907	0.901235	0.0200907	0.807229	0.0200907	0.566667		2	0.0232138	0.782609	0.0232138	0.708333	0.0232138	0.782609
3	0.0124712	1	0.0124712	0.833333	0.0124712	0.156863		3	0.0205647	1	0.0205647	1	0.0205647	1
4	0.0134052	0.809524	0.0134052	0.208333	0.0134052	0.243243		4	0.0387024	0.914634	0.0387024	0.853659	0.0387024	0.914634
5	0.02602	0.901235	0.02602	0.790698	0.02602	0.548387		5	0.0247328	0.846154	0.0247328	0.846154	0.0247328	1
6	0.030659	1	0.030659	0.770833	0.030659	0		6	0.0670688	0.831169	0.0670688	0.724576	0.0670688	0.539394
7	0.0336299	0.943662	0.0336299	0.780822	0.0336299	0.317757		7	0.0205522	0.92	0.0205522	0.730769	0.0205522	0.769231
8	0.0202908	0.733333	0.0202908	0.793103	0.0202908	0.793103		8	0.0303146	0.818182	0.0303146	0.815789	0.0303146	0.555556
9	0.0455898	0.844068	0.0455898	0.693811	0.0455898	0		9	0.0190481	0.958333	0.0190481	0.958333	0.0190481	1
10	0.0154932	0.666667	0.0154932	0.666667	0.0154932	0.666667		10	0.0335904	0.897959	0.0335904	0.712871	0.0335904	0.918367
11	0.0199223	0.913043	0.0199223	0.731959	0.0199223	0.303704		11	0.0122539	1	0.0122539	0.75	0.0122539	1
12	0.0202938	1	0.0202938	0.758242	0.0202938	0		12	0.0142973	0.1	0.0142973	0.1	0.0142973	0.1
13	0.0143853	1	0.0143853	1	0.0143853	1		13	0.0200073	0.842105	0.0200073	0.75	0.0200073	0.842105
14	0.0383394	0.909836	0.0383394	0.713178	0.0383394	0.184382		14	0.0263421	0.888889	0.0263421	0.970588	0.0263421	0.914286
15	0.0155678	1	0.0155678	0.6	0.0155678	1		15	0.0230681	1	0.0230681	1	0.0230681	1
16	0.0229075	0.771429	0.0229075	0.657143	0.0229075	0.622222		16	0.0491373	0.909091	0.0491373	0.83432	0.0491373	0.549801
17	0.0542926	0.891892	0.0542926	0.739583	0.0542926	0.27931		17	0.0259132	0.901408	0.0259132	0.649351	0.0259132	0.956522
18	0.0251069	1	0.0251069	0.939394	0.0251069	1		18	0.0254625	0.923077	0.0254625	0.745455	0.0254625	0.923077
19	0.0340348	0.954023	0.0340348	0.645833	0.0340348	0.230263		19	0.0211399	1	0.0211399	0.515152	0.0211399	1
20	0.0285399	1	0.0285399	0.781818	0.0285399	0.316456		20	0.0347295	0.8	0.0347295	0.75	0.0347295	0.8
21	0.0334225	0.897436	0.0334225	0.703704	0.0334225	0.327103		21	0.0415311	0.923077	0.0415311	0.633663	0.0415311	0.467532
22	0.0394245	0.840909	0.0394245	0.677419	0.0394245	0.263359		22	0.0448121	0.813793	0.0448121	0.75	0.0448121	0.583333
23	0.0301769	0.821429	0.0301769	0.318966	0.0301769	0.226131		23	0.069483	0.885572	0.069483	0.78744	0.069483	0.660232
24	0.0281451	0.902439	0.0281451	0.662921	0.0281451	0.564103		24	0.0370222	0.833333	0.0370222	0.741176	0.0370222	0.435714
25	0.0524235	0.838828	0.0524235	0.695035	0.0524235	0.222944		25	0.0302138	0.846154	0.0302138	0.846154	0.0302138	0.846154
26	0.0239455	0.892857	0.0239455	0.762712	0.0239455	0		26	0.0355836	0.862069	0.0355836	0.717391	0.0355836	0.532258
27	0.0261205	0.737705	0.0261205	0.253731	0.0261205	0.263736		27	0.0225446	1	0.0225446	0.846154	0.0225446	1
28	0.0586435	0.849398	0.0586435	0.649718	0.0586435	0		28	0.0562944	0.945736	0.0562944	0.827068	0.0562944	0.696429
29	0.016088	0.916667	0.016088	0.833333	0.016088	0.363636		29	0.0303462	0.773585	0.0303462	0.722222	0.0303462	0.773585
30	0.0178792	0.909091	0.0178792	0.24	0.0178792	0.909091		30	0.0221359	1	0.0221359	0.5	0.0221359	1
31	0.0242687	0.942857	0.0242687	0.68	0.0242687	0.235772		31	0.0217668	1	0.0217668	1	0.0217668	1
32	0.0206236	0.836735	0.0206236	0.653846	0.0206236	0.230769		32	0.0239433	0.847826	0.0239433	0.54902	0.0239433	0.847826
33	0.021287	0.8	0.021287	0.302326	0.021287	0.469697		33	0.0249719	1	0.0249719	0.851852	0.0249719	1
34	0.0522757	0.842254	0.0522757	0.624339	0.0522757	0.12835		34	0.0165811	1	0.0165811	1	0.0165811	1
35	0.0119385	0.75	0.0119385	0.333333	0.0119385	0.75		35	0.0185901	0.888889	0.0185901	0.888889	0.0185901	0.888889
36	0.0257554	0.913978	0.0257554	0.752577	0.0257554	0.658915		36	0.0329017	0.887324	0.0329017	0.756757	0.0329017	0.887324
37	0.0222348	0.885714	0.0222348	0.675676	0.0222348	0.267857		37	0.0215421	0.6875	0.0215421	0.588235	0.0215421	0.6875
38	0.0368184	0.84	0.0368184	0.710638	0.0368184	0.0835681		38	0.0351156	0.867647	0.0351156	0.811594	0.0351156	0.867647
39	0.0276775	0.898734	0.0276775	0.642857	0.0276775	0.605263		39	0.0237746	0.95	0.0237746	0.833333	0.0237746	0.95
40	0.0358175	0.76	0.0358175	0.72	0.0358175	0.222222		40	0.0410782	0.973684	0.0410782	0.686047	0.0410782	0.973684
41	0.0231699	0.868852	0.0231699	0.83871	0.0231699	0.273684		41	0.0233499	0.653846	0.0233499	0.653846	0.0233499	0.8
42	0.0341154	0.952	0.0341154	0.757576	0.0341154	0.306452		42	0.0209856	0.806452	0.0209856	0.6875	0.0209856	0.71875
43	0.0303018	0.911111	0.0303018	0.6	0.0303018	0.333333		43	0.0207058	1	0.0207058	1	0.0207058	1
44	0.0177699	0.84	0.0177699	0.833333	0.0177699	0.84		44	0.01736	0.142857	0.01736	0.466667	0.01736	0.636364
45	0.0163306	0.692308	0.0163306	0.692308	0.0163306	1		45	0.023956	0.707317	0.023956	0.341463	0.023956	0.820513
46	0.016324	1	0.016324	0.857143	0.016324	1		46	0.0218183	0.911111	0.0218183	0.75	0.0218183	0.869565
47	0.0234667	0.854545	0.0234667	0.540984	0.0234667	0.217822		47	0.0197203	0.9	0.0197203	0.9	0.0197203	0.9
48	0.012066	1	0.012066	0	0.012066	1		48	0.0232358	0.9	0.0232358	0.9	0.0232358	0.9
49	0.0222274	0.933333	0.0222274	0.774194	0.0222274	0.58427		49	0.0563659	0.854839	0.0563659	0.728682	0.0563659	0.833333
50	0.0215069	0.948718	0.0215069	0.85	0.0215069	0.293103		50	0.0211659	1	0.0211659	1	0.0211659	1
51	0.0347827	0.934211	0.0347827	0.691358	0.0347827	0.241935		51	0.0237622	0.75	0.0237622	0.6	0.0237622	0.833333
52	0.0171388	0.277778	0.0171388	0.235294	0.0171388	0.263158		52	0.034706	0.861702	0.034706	0.653465	0.034706	0.636364
53	0.0621493	0.868217	0.0621493	0.719557	0.0621493	0		53	0.0586358	0.838542	0.0586358	0.806122	0.0586358	0.488372
54	0.0311999	0.8	0.0311999	0.59375	0.0311999	0.528736		54	0.0221535	0.744681	0.0221535	0.591837	0.0221535	0.744681
55	0.0260732	0.891892	0.0260732	0.666667	0.0260732	0.314815		55	0.0168649	1	0.0168649	1	0.0168649	1
56	0.0351655	0.95122	0.0351655	0.328358	0.0351655	0		56	0.0178741	0.846154	0.0178741	0.846154	0.0178741	0.846154
57	0.074843	0.926531	0.074843	0.637736	0.074843	0.202062		57	0.0279408	0.962963	0.0279408	0.821429	0.0279408	0.962963
58	0.0198276	0.771429	0.0198276	0.666667	0.0198276	0.288889		58	0.0236868	1	0.0236868	1	0.0236868	1
59	0.0395099	0.816993	0.0395099	0.641975	0.0395099	0.604762		59	0.0487565	0.929825	0.0487565	0.912281	0.0487565	0.675676
60	0.0618604	0.944	0.0618604	0.771863	0.0618604	0.207619		60	0.0283974	0.709091	0.0283974	0.59322	0.0283974	0.709091
61	0.011613	0.6	0.011613	0.5	0.011613	0.6		61	0.0237417	0.705882	0.0237417	0.528302	0.0237417	0.457143
62	0.0152528	0.809524	0.0152528	0.636364	0.0152528	0.809524		62	0.0241864	0.910714	0.0241864	0.857143	0.0241864	0.910714
63	0.0465447	0.880952	0.0465447	0.758621	0.0465447	0.132		63	0.0263604	0.818182	0.0263604	0.818182	0.0263604	0.84375
64	0.0375894	0.908046	0.0375894	0.865169	0.0375894	0.231788		64	0.0388261	0.883929	0.0388261	0.726496	0.0388261	0.614379
65	0.0215855	1	0.0215855	0.675676	0.0215855	0.702128		65	0.0289838	0.851852	0.0289838	0.684211	0.0289838	0.851852
66	0.0501289	0.847534	0.0501289	0.698276	0.0501289	0.0750436		66	0.0252611	0.931818	0.0252611	0.909091	0.0252611	0.30137
67	0.0118654	0.636364	0.0118654	0.454545	0.0118654	0.636364		67	0.0269446	0.980392	0.0269446	0.846154	0.0269446	0.980392
68	0.0294149	0.950617	0.0294149	0.764706	0.0294149	0.257353		68	0.0274591	0.61194	0.0274591	0.478261	0.0274591	0.623188
69	0.046597	0.865031	0.046597	0.705882	0.046597	0.276265		69	0.0190913	0.722222	0.0190913	0.621622	0.0190913	0.771429
70	0.0246946	0.692308	0.0246946	0.342105	0.0246946	0.290909		70	0.034295	0.783133	0.034295	0.717647	0.034295	0.783133
71	0.0236705	0.866667	0.0236705	0.774194	0.0236705	0.561798		71	0.0166738	0.923077	0.0166738	0.785714	0.0166738	0.923077
72	0.0352116	0.902439	0.0352116	0.767442	0.0352116	0.285714		72	0.0370521	0.854369	0.0370521	0.764706	0.0370521	0.551724
73	0.029466	0.746835	0.029466	0.721519	0.029466	0.279661		73	0.0201541	0.703704	0.0201541	0.692308	0.0201541	0.846154
74	0.0204017	0.8	0.0204017	0.619048	0.0204017	0.333333		74	0.0238278	0.865385	0.0238278	0.759259	0.0238278	0.865385
75	0.0320873	0.809524	0.0320873	0.617978	0.0320873	0.298246		75	0.0224214	0.666667	0.0224214	0.72973	0.0224214	0.810811
76	0.0160842	1	0.0160842	1	0.0160842	1		76	0.0164187	1	0.0164187	1	0.0164187	1
77	0.030653	0.74359	0.030653	0.348837	0.030653	0		77	0.0257408	1	0.0257408	0.762712	0.0257408	0.554217
78	0.0515183	0.918033	0.0515183	0.716535	0.0515183	0.25		78	0.0380431	0.764151	0.0380431	0.682243	0.0380431	0.768519
79	0.0248216	0.877551	0.0248216	0.358491	0.0248216	0.348485		79	0.0355281	0.883929	0.0355281	0.745763	0.0355281	0.603774
80	0.0163695	0	0.0163695	0	0.0163695	0		80	0.0197127	0.857143	0.0197127	0.724138	0.0197127	0.857143
81	0.0357241	0.835165	0.0357241	0.670213	0.0357241	0.254296		81	0.0212648	0.928571	0.0212648	0.8	0.0212648	0.928571
82	0.0190777	1	0.0190777	0.294118	0.0190777	0		82	0.0217412	0.925	0.0217412	0.878049	0.0217412	0.925
83	0.0227048	1	0.0227048	0.75	0.0227048	0.326087		83	0.0472499	0.716216	0.0472499	0.671053	0.0472499	0.422414
84	0.04425	0.846995	0.04425	0.673684	0.04425	0.261818		84	0.0300541	0.808511	0.0300541	0.320755	0.0300541	0.826087
85	0.0501143	0.881081	0.0501143	0.747368	0.0501143	0.157609		85	0.0249168	0.692308	0.0249168	0.76	0.0249168	0.76
86	0.0262568	0.948718	0.0262568	0.655172	0.0262568	0.295652		86	0.0269163	1	0.0269163	0.826087	0.0269163	1
87	0.0227487	0.973684	0.0227487	0.365854	0.0227487	0		87	0.0273574	0.78125	0.0273574	0.78125	0.0273574	0.78125
88	0.0179401	1	0.0179401	1	0.0179401	1		88	0.0819979	0.915344	0.0819979	0.817259	0.0819979	0.915344
89	0.0182089	0.818182	0.0182089	0.617021	0.0182089	0.166667		89	0.0242602	1	0.0242602	0.769231	0.0242602	1
90	0.0218444	1	0.0218444	0.818182	0.0218444	0.259615		90	0.0620292	0.905882	0.0620292	0.743017	0.0620292	0.552
91	0.041819	0.820106	0.041819	0.63	0.041819	0.174286		91	0.0409048	0.873134	0.0409048	0.707143	0.0409048	0.546392
92	0.0304788	0.875776	0.0304788	0.760479	0.0304788	0		92	0.018782	0.75	0.018782	0.75	0.018782	0.75
93	0.0258538	0.842857	0.0258538	0.315789	0.0258538	0.543689		93	0.0593753	0.902913	0.0593753	0.792453	0.0593753	0.56129
94	0.01862	0.589744	0.01862	0.181818	0.01862	0.259259		94	0.0219042	0.5	0.0219042	0.636364	0.0219042	0.636364
95	0.0561673	0.814433	0.0561673	0.693333	0.0561673	0.269231		95	0.0292658	0.837838	0.0292658	0.736842	0.0292658	0.0461538
96	0.022801	0.931034	0.022801	0.864407	0.022801	0.216981		96	0.0245447	0.913043	0.0245447	0.75	0.0245447	0.913043
97	0.0238748	0.892857	0.0238748	0.35	0.0238748	0		97	0.0238262	1	0.0238262	0.714286	0.0238262	1
98	0.040219	0.918129	0.040219	0.79661	0.040219	0.216049		98	0.0288178	0.666667	0.0288178	0.466667	0.0288178	0.692308
99	0.0194498	0.75	0.0194498	0.333333	0.0194498	0.75		99	0.032446	0.875	0.032446	0.686275	0.032446	0.913043
100	0.017728	1	0.017728	1	0.017728	1		100	0.0325429	0.958333	0.0325429	0.958333	0.0325429	0.958333
