# Supplementary material for: Top-down machine learning approach for high-throughput single-molecule analysis
Source: eLife journal article supplement (doi:10.7554/elife.53357), 2020-04-08
Supplement: supp [file elife-53357-supp-v1.zip › elife_poa_e53357_Figure_5_source_data_1.xlsx]

## Sheet: Figure 5b
Example Trajectory
Frame	Time (s)	Intensity (au)	DISC Fit
1	0.1	712.619	682.575
2	0.2	737.095	682.575
3	0.3	674.762	682.575
4	0.4	553.952	585.307
5	0.5	656.905	585.307
6	0.6	606.048	585.307
7	0.7	589	585.307
8	0.8	564.381	585.307
9	0.9	652.429	585.307
10	1	576.619	585.307
11	1.1	611.238	585.307
12	1.2	600.476	585.307
13	1.3	576.524	585.307
14	1.4	605.857	585.307
15	1.5	590.048	585.307
16	1.6	616.238	585.307
17	1.7	562.048	585.307
18	1.8	610.619	585.307
19	1.9	614.143	585.307
20	2	620.952	585.307
21	2.1	646.81	585.307
22	2.2	588.476	585.307
23	2.3	612.619	585.307
24	2.4	579.048	585.307
25	2.5	627.571	585.307
26	2.6	599.286	585.307
27	2.7	725.524	682.575
28	2.8	582.238	585.307
29	2.9	624.857	585.307
30	3	657.095	585.307
31	3.1	585.333	585.307
32	3.2	592.095	585.307
33	3.3	614.238	585.307
34	3.4	590.333	585.307
35	3.5	582.429	585.307
36	3.6	565.048	585.307
37	3.7	602.476	585.307
38	3.8	583.238	585.307
39	3.9	662.714	585.307
40	4	605.333	585.307
41	4.1	574.476	585.307
42	4.2	608.238	585.307
43	4.3	559	585.307
44	4.4	595.81	585.307
45	4.5	576.476	585.307
46	4.6	617.19	585.307
47	4.7	607.143	585.307
48	4.8	579.714	585.307
49	4.9	547.571	585.307
50	5	442.048	493.112
51	5.1	503.857	493.112
52	5.2	524.667	493.112
53	5.3	528.095	493.112
54	5.4	491.905	493.112
55	5.5	479.905	493.112
56	5.6	525.619	493.112
57	5.7	531.143	493.112
58	5.8	499.095	493.112
59	5.9	503.381	493.112
60	6	516	493.112
61	6.1	511.857	493.112
62	6.2	516.952	493.112
63	6.3	535.952	493.112
64	6.4	485.952	493.112
65	6.5	513.095	493.112
66	6.6	504.095	493.112
67	6.7	491.095	493.112
68	6.8	503.667	493.112
69	6.9	546.333	493.112
70	7	513.524	493.112
71	7.1	542.714	493.112
72	7.2	480.048	493.112
73	7.3	510.238	493.112
74	7.4	559.81	493.112
75	7.5	534.286	493.112
76	7.6	514.143	493.112
77	7.7	518.81	493.112
78	7.8	510.667	493.112
79	7.9	534.524	493.112
80	8	527.81	493.112
81	8.1	492.524	493.112
82	8.2	483.81	493.112
83	8.3	484.714	493.112
84	8.4	506.714	493.112
85	8.5	524.381	493.112
86	8.6	498.857	493.112
87	8.7	458.952	493.112
88	8.8	498.143	493.112
89	8.9	525.238	493.112
90	9	546	493.112
91	9.1	510.143	493.112
92	9.2	516.238	493.112
93	9.3	500.952	493.112
94	9.4	511.905	493.112
95	9.5	566.81	493.112
96	9.6	524.381	493.112
97	9.7	478.762	493.112
98	9.8	524.571	493.112
99	9.9	597.429	585.307
100	10	543.571	585.307
101	10.1	561.238	585.307
102	10.2	533.952	493.112
103	10.3	490.619	493.112
104	10.4	499.476	493.112
105	10.5	500.952	493.112
106	10.6	500.762	493.112
107	10.7	501	493.112
108	10.8	499.571	493.112
109	10.9	568.857	585.307
110	11	537.667	585.307
111	11.1	547.667	585.307
112	11.2	541.952	585.307
113	11.3	607.286	585.307
114	11.4	629	585.307
115	11.5	611.286	585.307
116	11.6	612.619	585.307
117	11.7	520.19	493.112
118	11.8	526.667	493.112
119	11.9	512.81	493.112
120	12	457.19	493.112
121	12.1	372.19	407.53
122	12.2	467.762	407.53
123	12.3	435.286	407.53
124	12.4	415.381	407.53
125	12.5	400.238	407.53
126	12.6	405.429	407.53
127	12.7	465.476	493.112
128	12.8	487.524	493.112
129	12.9	487.095	493.112
130	13	516.19	493.112
131	13.1	490.095	493.112
132	13.2	490.857	493.112
133	13.3	462.667	493.112
134	13.4	577.619	585.307
135	13.5	557.619	585.307
136	13.6	596.476	585.307
137	13.7	584.095	585.307
138	13.8	605.095	585.307
139	13.9	565.524	585.307
140	14	587.19	585.307
141	14.1	585.429	585.307
142	14.2	569.333	585.307
143	14.3	559.381	585.307
144	14.4	595.095	585.307
145	14.5	587.143	585.307
146	14.6	553.571	585.307
147	14.7	545.762	585.307
148	14.8	534.381	493.112
149	14.9	491.667	493.112
150	15	515.429	493.112
151	15.1	460.667	493.112
152	15.2	525.429	493.112
153	15.3	492.286	493.112
154	15.4	477.286	493.112
155	15.5	483.095	493.112
156	15.6	400.238	407.53
157	15.7	396.952	407.53
158	15.8	425.762	407.53
159	15.9	421.81	407.53
160	16	505.286	493.112
161	16.1	420	407.53
162	16.2	437.762	407.53
163	16.3	405.524	407.53
164	16.4	421.143	407.53
165	16.5	393.667	407.53
166	16.6	414.476	407.53
167	16.7	462.429	407.53
168	16.8	430.286	407.53
169	16.9	410.762	407.53
170	17	390.476	407.53
171	17.1	394.857	407.53
172	17.2	418.19	407.53
173	17.3	408.857	407.53
174	17.4	426.571	407.53
175	17.5	451	407.53
176	17.6	450.952	407.53
177	17.7	442.286	407.53
178	17.8	429.095	407.53
179	17.9	427.048	407.53
180	18	391.667	407.53
181	18.1	470.81	493.112
182	18.2	487.143	493.112
183	18.3	502.333	493.112
184	18.4	449.476	493.112
185	18.5	538.429	493.112
186	18.6	538.667	493.112
187	18.7	485.19	493.112
188	18.8	603.19	585.307
189	18.9	589.857	585.307
190	19	596.238	585.307
191	19.1	564.81	585.307
192	19.2	524.476	493.112
193	19.3	502.429	493.112
194	19.4	485.238	493.112
195	19.5	521.952	493.112
196	19.6	485.333	493.112
197	19.7	615.143	585.307
198	19.8	563.19	585.307
199	19.9	567.048	585.307
200	20	590.905	585.307
201	20.1	610.952	585.307
202	20.2	568.143	585.307
203	20.3	573.762	585.307
204	20.4	572.429	585.307
205	20.5	581.381	585.307
206	20.6	591.571	585.307
207	20.7	564	585.307
208	20.8	579.19	585.307
209	20.9	606.143	585.307
210	21	594.571	585.307
211	21.1	628.19	585.307
212	21.2	552.762	585.307
213	21.3	468.143	493.112
214	21.4	553.238	493.112
215	21.5	481.429	493.112
216	21.6	493.048	493.112
217	21.7	517	493.112
218	21.8	520.619	493.112
219	21.9	451.238	493.112
220	22	468.571	493.112
221	22.1	510.381	493.112
222	22.2	513.905	493.112
223	22.3	561.571	585.307
224	22.4	554.714	585.307
225	22.5	607.524	585.307
226	22.6	613.952	585.307
227	22.7	658.857	585.307
228	22.8	569	585.307
229	22.9	599	585.307
230	23	589.333	585.307
231	23.1	565.952	585.307
232	23.2	599.524	585.307
233	23.3	607.81	585.307
234	23.4	580.524	585.307
235	23.5	562.381	585.307
236	23.6	667.81	585.307
237	23.7	553.19	585.307
238	23.8	632.81	585.307
239	23.9	603.667	585.307
240	24	601.619	585.307
241	24.1	588	585.307
242	24.2	627.476	585.307
243	24.3	536.048	585.307
244	24.4	622.714	585.307
245	24.5	570.857	585.307
246	24.6	559.81	585.307
247	24.7	579.619	585.307
248	24.8	653.905	682.575
249	24.9	624	682.575
250	25	701	682.575
251	25.1	671.619	682.575
252	25.2	671.429	682.575
253	25.3	650.714	682.575
254	25.4	627.905	682.575
255	25.5	694.381	682.575
256	25.6	767.667	682.575
257	25.7	708.238	682.575
258	25.8	651.905	682.575
259	25.9	649.429	682.575
260	26	673.81	682.575
261	26.1	734.095	682.575
262	26.2	671.048	682.575
263	26.3	678.286	682.575
264	26.4	695.19	682.575
265	26.5	774.476	682.575
266	26.6	720.571	682.575
267	26.7	665.81	682.575
268	26.8	642.19	682.575
269	26.9	768.714	682.575
270	27	617.905	682.575
271	27.1	594.571	682.575
272	27.2	627.619	682.575
273	27.3	788.476	682.575
274	27.4	574.238	585.307
275	27.5	604.81	585.307
276	27.6	578.667	585.307
277	27.7	588.952	585.307
278	27.8	673.381	585.307
279	27.9	572.143	585.307
280	28	602.524	585.307
281	28.1	638.286	585.307
282	28.2	567.714	585.307
283	28.3	598.286	585.307
284	28.4	659.714	682.575
285	28.5	675.905	682.575
286	28.6	708.095	682.575
287	28.7	535.19	585.307
288	28.8	604.286	585.307
289	28.9	610	585.307
290	29	597.286	585.307
291	29.1	654.952	585.307
292	29.2	565.095	585.307
293	29.3	614.095	585.307
294	29.4	606.714	585.307
295	29.5	569.714	585.307
296	29.6	604.714	585.307
297	29.7	609.238	585.307
298	29.8	616.429	585.307
299	29.9	638.81	585.307
300	30	610.381	585.307
301	30.1	559.619	585.307
302	30.2	614.143	585.307
303	30.3	669.048	682.575
304	30.4	737.571	682.575
305	30.5	653.667	682.575
306	30.6	749.19	682.575
307	30.7	669.143	682.575
308	30.8	671.857	682.575
309	30.9	660.619	682.575
310	31	697.381	682.575
311	31.1	658.619	682.575
312	31.2	655.762	682.575
313	31.3	705.524	682.575
314	31.4	693.667	682.575
315	31.5	714.19	682.575
316	31.6	673.476	682.575
317	31.7	693.286	682.575
318	31.8	653.762	682.575
319	31.9	690.667	682.575
320	32	663	682.575
321	32.1	676.714	682.575
322	32.2	658.381	682.575
323	32.3	693.952	682.575
324	32.4	657.762	682.575
325	32.5	611.19	585.307
326	32.6	616.571	585.307
327	32.7	627.333	585.307
328	32.8	582.905	585.307
329	32.9	553.429	585.307
330	33	603.571	585.307
331	33.1	608.333	585.307
332	33.2	578.714	585.307
333	33.3	519.857	585.307
334	33.4	604.429	585.307
335	33.5	589.286	585.307
336	33.6	602.095	585.307
337	33.7	544.524	585.307
338	33.8	522.333	493.112
339	33.9	487.762	493.112
340	34	508.238	493.112
341	34.1	491.429	493.112
342	34.2	524.048	493.112
343	34.3	495	493.112
344	34.4	490.476	493.112
345	34.5	494	493.112
346	34.6	530.667	493.112
347	34.7	530.333	493.112
348	34.8	533.952	493.112
349	34.9	540.048	493.112
350	35	527.381	493.112
351	35.1	465.19	493.112
352	35.2	488.429	493.112
353	35.3	505.238	493.112
354	35.4	444.429	493.112
355	35.5	471.81	493.112
356	35.6	441.524	493.112
357	35.7	523.571	493.112
358	35.8	503.952	493.112
359	35.9	523.524	493.112
360	36	508.857	493.112
361	36.1	497.619	493.112
362	36.2	525.429	493.112
363	36.3	476.048	493.112
364	36.4	503.095	493.112
365	36.5	479.286	493.112
366	36.6	512.381	493.112
367	36.7	492.571	493.112
368	36.8	504.238	493.112
369	36.9	492.714	493.112
370	37	521.476	493.112
371	37.1	514.238	493.112
372	37.2	529	493.112
373	37.3	518.667	493.112
374	37.4	425.143	493.112
375	37.5	543.238	585.307
376	37.6	555.238	585.307
377	37.7	594.143	585.307
378	37.8	550.429	585.307
379	37.9	515.952	493.112
380	38	492.81	493.112
381	38.1	489	493.112
382	38.2	503.667	493.112
383	38.3	494.238	493.112
384	38.4	490.714	493.112
385	38.5	462.905	493.112
386	38.6	443.333	407.53
387	38.7	412.857	407.53
388	38.8	421.619	407.53
389	38.9	411.619	407.53
390	39	435.333	407.53
391	39.1	445.857	407.53
392	39.2	430.81	407.53
393	39.3	431.286	407.53
394	39.4	454	407.53
395	39.5	448.619	407.53
396	39.6	409.19	407.53
397	39.7	436.476	407.53
398	39.8	418.571	407.53
399	39.9	395.333	407.53
400	40	429.524	407.53
401	40.1	413.286	407.53
402	40.2	461.81	407.53
403	40.3	399.905	407.53
404	40.4	465.762	407.53
405	40.5	435.762	407.53
406	40.6	303.81	322.221
407	40.7	353.476	322.221
408	40.8	328.238	322.221
409	40.9	319.762	322.221
410	41	330.762	322.221
411	41.1	321.905	322.221
412	41.2	311.762	322.221
413	41.3	326.095	322.221
414	41.4	311.571	322.221
415	41.5	335.429	322.221
416	41.6	447.571	407.53
417	41.7	419.619	407.53
418	41.8	418.048	407.53
419	41.9	418.81	407.53
420	42	411.143	407.53
421	42.1	423.619	407.53
422	42.2	415.714	407.53
423	42.3	405.048	407.53
424	42.4	407.048	407.53
425	42.5	391.19	407.53
426	42.6	445.429	407.53
427	42.7	417.19	407.53
428	42.8	374.762	407.53
429	42.9	335.286	322.221
430	43	293.333	322.221
431	43.1	292.381	322.221
432	43.2	307.714	322.221
433	43.3	389.381	407.53
434	43.4	391.81	407.53
435	43.5	419.571	407.53
436	43.6	387.143	407.53
437	43.7	401.81	407.53
438	43.8	445.667	407.53
439	43.9	399.762	407.53
440	44	404	407.53
441	44.1	447.667	407.53
442	44.2	434.333	407.53
443	44.3	461.619	493.112
444	44.4	483.238	493.112
445	44.5	483.333	493.112
446	44.6	499.667	493.112
447	44.7	518.095	493.112
448	44.8	491.286	493.112
449	44.9	502.476	493.112
450	45	479.524	493.112
451	45.1	467.238	493.112
452	45.2	478.333	493.112
453	45.3	460.905	493.112
454	45.4	474	493.112
455	45.5	548.19	493.112
456	45.6	472.619	493.112
457	45.7	544.333	493.112
458	45.8	482.476	493.112
459	45.9	467.905	493.112
460	46	459.095	493.112
461	46.1	489.81	493.112
462	46.2	468.857	493.112
463	46.3	522.238	493.112
464	46.4	528.429	493.112
465	46.5	477.667	493.112
466	46.6	472.762	493.112
467	46.7	505.429	493.112
468	46.8	513.714	493.112
469	46.9	475.19	493.112
470	47	489.667	493.112
471	47.1	511.524	493.112
472	47.2	521.571	493.112
473	47.3	482.667	493.112
474	47.4	517.286	493.112
475	47.5	447.857	493.112
476	47.6	472.095	493.112
477	47.7	477.381	493.112
478	47.8	507.762	493.112
479	47.9	538.81	493.112
480	48	449.19	493.112
481	48.1	488.857	493.112
482	48.2	494.714	493.112
483	48.3	557.714	493.112
484	48.4	450.429	493.112
485	48.5	518.095	493.112
486	48.6	541.714	493.112
487	48.7	487.762	493.112
488	48.8	526.524	493.112
489	48.9	474.143	493.112
490	49	497.714	493.112
491	49.1	507.905	493.112
492	49.2	535.524	493.112
493	49.3	639.476	585.307
494	49.4	573.905	585.307
495	49.5	490.714	493.112
496	49.6	478	493.112
497	49.7	483.286	493.112
498	49.8	482.714	493.112
499	49.9	478.429	493.112
500	50	518.095	493.112
501	50.1	498.476	493.112
502	50.2	463.857	493.112
503	50.3	492.714	493.112
504	50.4	503	493.112
505	50.5	512.762	493.112
506	50.6	481.714	493.112
507	50.7	536.429	493.112
508	50.8	481.524	493.112
509	50.9	492.81	493.112
510	51	506.524	493.112
511	51.1	465.333	493.112
512	51.2	529.429	493.112
513	51.3	563.095	493.112
514	51.4	568.095	493.112
515	51.5	479.762	493.112
516	51.6	433.81	407.53
517	51.7	397.238	407.53
518	51.8	396.048	407.53
519	51.9	452.381	407.53
520	52	402.571	407.53
521	52.1	391.762	407.53
522	52.2	451.619	407.53
523	52.3	452.19	407.53
524	52.4	382.19	407.53
525	52.5	403.619	407.53
526	52.6	409.429	407.53
527	52.7	415.095	407.53
528	52.8	364.952	407.53
529	52.9	391.952	407.53
530	53	429.81	407.53
531	53.1	390.238	407.53
532	53.2	405.238	407.53
533	53.3	415.143	407.53
534	53.4	415.524	407.53
535	53.5	415.952	407.53
536	53.6	438.667	407.53
537	53.7	450.429	407.53
538	53.8	423.143	407.53
539	53.9	405.143	407.53
540	54	380.619	407.53
541	54.1	399.429	407.53
542	54.2	457.048	407.53
543	54.3	399.429	407.53
544	54.4	456.857	407.53
545	54.5	435.286	407.53
546	54.6	373.667	407.53
547	54.7	402.381	407.53
548	54.8	453.286	493.112
549	54.9	513.81	493.112
550	55	468.762	493.112
551	55.1	516.905	493.112
552	55.2	513.476	493.112
553	55.3	476.81	493.112
554	55.4	512.619	493.112
555	55.5	467.571	493.112
556	55.6	464.619	493.112
557	55.7	509.286	493.112
558	55.8	502.429	493.112
559	55.9	508.714	493.112
560	56	484.952	493.112
561	56.1	513	493.112
562	56.2	506.571	493.112
563	56.3	497.429	493.112
564	56.4	469.714	493.112
565	56.5	514.476	493.112
566	56.6	536.952	493.112
567	56.7	484	493.112
568	56.8	477.905	493.112
569	56.9	521.286	493.112
570	57	513.905	493.112
571	57.1	517.286	493.112
572	57.2	494.095	493.112
573	57.3	550.762	493.112
574	57.4	484.714	493.112
575	57.5	496.143	493.112
576	57.6	507.667	493.112
577	57.7	615.429	585.307
578	57.8	527	585.307
579	57.9	647.952	585.307
580	58	588.19	585.307
581	58.1	607.571	585.307
582	58.2	533.429	585.307
583	58.3	589.19	585.307
584	58.4	603.905	585.307
585	58.5	592.619	585.307
586	58.6	556.381	585.307
587	58.7	597.238	585.307
588	58.8	532.667	585.307
589	58.9	577.19	585.307
590	59	571.476	585.307
591	59.1	573.571	585.307
592	59.2	571.333	585.307
593	59.3	585.095	585.307
594	59.4	593.095	585.307
595	59.5	549.524	585.307
596	59.6	569.381	585.307
597	59.7	604.333	585.307
598	59.8	590.429	585.307
599	59.9	566.048	585.307
600	60	560.095	585.307
601	60.1	588.429	585.307
602	60.2	561.571	585.307
603	60.3	590.048	585.307
604	60.4	571.524	585.307
605	60.5	538.81	585.307
606	60.6	595.286	585.307
607	60.7	682.143	682.575
608	60.8	645.476	682.575
609	60.9	651.476	682.575
610	61	635.381	682.575
611	61.1	706.762	682.575
612	61.2	676.286	682.575
613	61.3	674.857	682.575
614	61.4	680.667	682.575
615	61.5	648.333	682.575
616	61.6	683.714	682.575
617	61.7	524.333	585.307
618	61.8	596.286	585.307
619	61.9	586.048	585.307
620	62	491.714	493.112
621	62.1	423.905	493.112
622	62.2	472.81	493.112
623	62.3	489.857	493.112
624	62.4	495.048	493.112
625	62.5	491.571	493.112
626	62.6	472.667	493.112
627	62.7	473.762	493.112
628	62.8	501.524	493.112
629	62.9	497.476	493.112
630	63	475.571	493.112
631	63.1	472.048	493.112
632	63.2	461.857	493.112
633	63.3	441.143	493.112
634	63.4	422.238	493.112
635	63.5	497.048	493.112
636	63.6	513.381	493.112
637	63.7	482.524	493.112
638	63.8	509.619	493.112
639	63.9	432.238	493.112
640	64	549	493.112
641	64.1	479.143	493.112
642	64.2	523.143	493.112
643	64.3	467	493.112
644	64.4	468.238	493.112
645	64.5	469.19	493.112
646	64.6	424.143	407.53
647	64.7	384.238	407.53
648	64.8	391.286	407.53
649	64.9	382.952	407.53
650	65	375.952	407.53
651	65.1	391.524	407.53
652	65.2	388.762	407.53
653	65.3	415.286	407.53
654	65.4	404.238	407.53
655	65.5	421.19	407.53
656	65.6	465.19	493.112
657	65.7	471.238	493.112
658	65.8	509.238	493.112
659	65.9	456.286	493.112
660	66	484.048	493.112
661	66.1	521.286	493.112
662	66.2	456.333	493.112
663	66.3	500.19	493.112
664	66.4	465.143	493.112
665	66.5	464.714	493.112
666	66.6	522.19	493.112
667	66.7	488.143	493.112
668	66.8	447.667	493.112
669	66.9	492.619	493.112
670	67	462.048	493.112
671	67.1	519.762	493.112
672	67.2	537.571	493.112
673	67.3	474.476	493.112
674	67.4	541.238	493.112
675	67.5	522.714	493.112
676	67.6	511.143	493.112
677	67.7	461.905	493.112
678	67.8	473.952	493.112
679	67.9	462.238	493.112
680	68	445.81	493.112
681	68.1	481.81	493.112
682	68.2	482.095	493.112
683	68.3	432.619	493.112
684	68.4	457.429	493.112
685	68.5	507.667	493.112
686	68.6	567.667	585.307
687	68.7	599.143	585.307
688	68.8	556.524	585.307
689	68.9	507.429	493.112
690	69	526.905	493.112
691	69.1	474.095	493.112
692	69.2	503.429	493.112
693	69.3	518.81	493.112
694	69.4	503	493.112
695	69.5	551	493.112
696	69.6	510.667	493.112
697	69.7	483.095	493.112
698	69.8	517.238	493.112
699	69.9	500.905	493.112
700	70	477.571	493.112
701	70.1	481.619	493.112
702	70.2	476.476	493.112
703	70.3	467.095	493.112
704	70.4	539.381	493.112
705	70.5	502.143	493.112
706	70.6	491.667	493.112
707	70.7	477.714	493.112
708	70.8	531.238	493.112
709	70.9	489.095	493.112
710	71	459.476	493.112
711	71.1	450.048	493.112
712	71.2	446.952	493.112
713	71.3	491.238	493.112
714	71.4	463.619	493.112
715	71.5	469.952	493.112
716	71.6	499.238	493.112
717	71.7	498.286	493.112
718	71.8	422.857	493.112
719	71.9	478.524	493.112
720	72	460.524	493.112
721	72.1	508.476	493.112
722	72.2	464.381	493.112
723	72.3	525.905	493.112
724	72.4	532.048	493.112
725	72.5	506.762	493.112
726	72.6	510.238	493.112
727	72.7	526.143	493.112
728	72.8	440.238	493.112
729	72.9	474.762	493.112
730	73	449	493.112
731	73.1	476.857	493.112
732	73.2	464.286	493.112
733	73.3	508	493.112
734	73.4	464.714	493.112
735	73.5	515.81	493.112
736	73.6	488.095	493.112
737	73.7	480.571	493.112
738	73.8	452.857	493.112
739	73.9	483.286	493.112
740	74	498.952	493.112
741	74.1	478.762	493.112
742	74.2	516.095	493.112
743	74.3	466.524	493.112
744	74.4	438.476	493.112
745	74.5	482.476	493.112
746	74.6	507.667	493.112
747	74.7	414.762	493.112
748	74.8	478.619	493.112
749	74.9	467.286	493.112
750	75	466.857	493.112
751	75.1	461.905	493.112
752	75.2	461.857	493.112
753	75.3	437.333	493.112
754	75.4	446.381	493.112
755	75.5	474.714	493.112
756	75.6	517.143	493.112
757	75.7	477.476	493.112
758	75.8	469.524	493.112
759	75.9	476.238	493.112
760	76	445.619	493.112
761	76.1	499.952	493.112
762	76.2	418.286	407.53
763	76.3	407.81	407.53
764	76.4	370.667	407.53
765	76.5	401.095	407.53
766	76.6	411.476	407.53
767	76.7	401.333	407.53
768	76.8	418.238	407.53
769	76.9	371.762	407.53
770	77	375.667	407.53
771	77.1	407.286	407.53
772	77.2	389.048	407.53
773	77.3	424.238	407.53
774	77.4	396.429	407.53
775	77.5	413	407.53
776	77.6	428.714	407.53
777	77.7	423.667	407.53
778	77.8	367.429	407.53
779	77.9	390.81	407.53
780	78	369	407.53
781	78.1	377.095	407.53
782	78.2	367.476	407.53
783	78.3	385.333	407.53
784	78.4	397.524	407.53
785	78.5	413.429	407.53
786	78.6	415.143	407.53
787	78.7	402.19	407.53
788	78.8	397.905	407.53
789	78.9	408.952	407.53
790	79	407.619	407.53
791	79.1	361.238	407.53
792	79.2	415.905	407.53
793	79.3	426.333	407.53
794	79.4	416.476	407.53
795	79.5	362.476	407.53
796	79.6	390.143	407.53
797	79.7	405.333	407.53
798	79.8	386.143	407.53
799	79.9	406.048	407.53
800	80	407.095	407.53
801	80.1	416.286	407.53
802	80.2	396.524	407.53
803	80.3	392.19	407.53
804	80.4	490.81	407.53
805	80.5	406.667	407.53
806	80.6	396.762	407.53
807	80.7	414.476	407.53
808	80.8	425.524	407.53
809	80.9	395.952	407.53
810	81	430.619	407.53
811	81.1	379.19	407.53
812	81.2	380.81	407.53
813	81.3	425.905	407.53
814	81.4	404.333	407.53
815	81.5	429.143	407.53
816	81.6	372.667	407.53
817	81.7	404.048	407.53
818	81.8	397.905	407.53
819	81.9	393.381	407.53
820	82	403.19	407.53
821	82.1	399.19	407.53
822	82.2	353.571	407.53
823	82.3	389.286	407.53
824	82.4	381.714	407.53
825	82.5	391.619	407.53
826	82.6	400.905	407.53
827	82.7	373.619	407.53
828	82.8	437.476	407.53
829	82.9	384.905	407.53
830	83	416.619	407.53
831	83.1	410.714	407.53
832	83.2	368.762	407.53
833	83.3	378.333	407.53
834	83.4	371.619	407.53
835	83.5	393.81	407.53
836	83.6	383.476	407.53
837	83.7	368.714	407.53
838	83.8	461.429	493.112
839	83.9	502.238	493.112
840	84	476.762	493.112
841	84.1	514.19	493.112
842	84.2	475.429	493.112
843	84.3	475.81	493.112
844	84.4	495.381	493.112
845	84.5	480.619	493.112
846	84.6	521.238	493.112
847	84.7	522.571	493.112
848	84.8	497.429	493.112
849	84.9	481.619	493.112
850	85	512.238	493.112
851	85.1	489.857	493.112
852	85.2	539.571	493.112
853	85.3	551.619	493.112
854	85.4	564.238	493.112
855	85.5	529.857	493.112
856	85.6	548.476	493.112
857	85.7	494.714	493.112
858	85.8	514.238	493.112
859	85.9	478.429	493.112
860	86	465.571	493.112
861	86.1	464.238	493.112
862	86.2	442.81	493.112
863	86.3	487.81	493.112
864	86.4	443.81	493.112
865	86.5	540.619	493.112
866	86.6	472.238	493.112
867	86.7	437.429	407.53
868	86.8	431.667	407.53
869	86.9	409.476	407.53
870	87	423	407.53
871	87.1	431.619	407.53
872	87.2	435.381	407.53
873	87.3	387.762	407.53
874	87.4	401.905	407.53
875	87.5	398.429	407.53
876	87.6	409.238	407.53
877	87.7	365.762	407.53
878	87.8	362.143	407.53
879	87.9	394.429	407.53
880	88	401.19	407.53
881	88.1	428.333	407.53
882	88.2	451.81	407.53
883	88.3	438.857	407.53
884	88.4	512.429	493.112
885	88.5	466.81	493.112
886	88.6	501.286	493.112
887	88.7	475.143	493.112
888	88.8	447.238	493.112
889	88.9	490.762	493.112
890	89	542.381	493.112
891	89.1	519.381	493.112
892	89.2	463.952	493.112
893	89.3	483.619	493.112
894	89.4	479.571	493.112
895	89.5	514.619	493.112
896	89.6	481.81	493.112
897	89.7	493.143	493.112
898	89.8	497.762	493.112
899	89.9	494.952	493.112
900	90	552.095	493.112
901	90.1	545.857	493.112
902	90.2	467.524	493.112
903	90.3	488.571	493.112
904	90.4	509.714	493.112
905	90.5	480.952	493.112
906	90.6	536.905	493.112
907	90.7	481.619	493.112
908	90.8	516.048	493.112
909	90.9	472.048	493.112
910	91	458.857	493.112
911	91.1	512.762	493.112
912	91.2	516.476	493.112
913	91.3	485.286	493.112
914	91.4	479.333	493.112
915	91.5	474.143	493.112
916	91.6	441.667	407.53
917	91.7	408.048	407.53
918	91.8	434	407.53
919	91.9	415.905	407.53
920	92	377.476	407.53
921	92.1	386.905	407.53
922	92.2	390.857	407.53
923	92.3	407.667	407.53
924	92.4	429.952	407.53
925	92.5	382.524	407.53
926	92.6	410	407.53
927	92.7	384.619	407.53
928	92.8	412.095	407.53
929	92.9	424.429	407.53
930	93	407	407.53
931	93.1	384.857	407.53
932	93.2	386.333	407.53
933	93.3	384.857	407.53
934	93.4	434.762	407.53
935	93.5	407.333	407.53
936	93.6	383.524	407.53
937	93.7	427.619	407.53
938	93.8	390.619	407.53
939	93.9	404.524	407.53
940	94	390.905	407.53
941	94.1	392	407.53
942	94.2	399.571	407.53
943	94.3	409.571	407.53
944	94.4	419.238	407.53
945	94.5	410.81	407.53
946	94.6	423.476	407.53
947	94.7	386.762	407.53
948	94.8	404.619	407.53
949	94.9	426.714	407.53
950	95	407.381	407.53
951	95.1	412.095	407.53
952	95.2	403.333	407.53
953	95.3	400.762	407.53
954	95.4	368.619	407.53
955	95.5	431.619	407.53
956	95.6	419.619	407.53
957	95.7	382.524	407.53
958	95.8	431.952	407.53
959	95.9	392.238	407.53
960	96	454.381	407.53
961	96.1	390.238	407.53
962	96.2	376.714	407.53
963	96.3	379.095	407.53
964	96.4	432	407.53
965	96.5	398.095	407.53
966	96.6	421.619	407.53
967	96.7	449.762	407.53
968	96.8	367	407.53
969	96.9	413.714	407.53
970	97	409.048	407.53
971	97.1	406.19	407.53
972	97.2	425.429	407.53
973	97.3	421.952	407.53
974	97.4	427.952	407.53
975	97.5	410.476	407.53
976	97.6	409.095	407.53
977	97.7	385.143	407.53
978	97.8	407.238	407.53
979	97.9	505.952	493.112
980	98	488.762	493.112
981	98.1	428.952	407.53
982	98.2	431.286	407.53
983	98.3	452.333	407.53
984	98.4	374.905	407.53
985	98.5	358.333	407.53
986	98.6	387.857	407.53
987	98.7	405.095	407.53
988	98.8	401.571	407.53
989	98.9	423.095	407.53
990	99	474.143	407.53
991	99.1	423.81	407.53
992	99.2	390.333	407.53
993	99.3	410.619	407.53
994	99.4	409.476	407.53
995	99.5	408.619	407.53
996	99.6	379.095	407.53
997	99.7	408.905	407.53
998	99.8	395.381	407.53
999	99.9	388.905	407.53
1000	100	378.81	407.53
1001	100.1	396.952	407.53
1002	100.2	411.905	407.53
1003	100.3	424.667	407.53
1004	100.4	408.143	407.53
1005	100.5	436.857	407.53
1006	100.6	402.095	407.53
1007	100.7	395.524	407.53
1008	100.8	369.952	407.53
1009	100.9	456.81	407.53
1010	101	416.381	407.53
1011	101.1	393.048	407.53
1012	101.2	432.524	407.53
1013	101.3	428.857	407.53
1014	101.4	404.905	407.53
1015	101.5	451.238	407.53
1016	101.6	416.762	407.53
1017	101.7	390.667	407.53
1018	101.8	423.524	407.53
1019	101.9	362.238	322.221
1020	102	293.143	322.221
1021	102.1	342.762	322.221
1022	102.2	327.19	322.221
1023	102.3	339.714	322.221
1024	102.4	302.429	322.221
1025	102.5	315.714	322.221
1026	102.6	304.286	322.221
1027	102.7	314.429	322.221
1028	102.8	332.571	322.221
1029	102.9	334.762	322.221
1030	103	466.952	407.53
1031	103.1	341	322.221
1032	103.2	313.381	322.221
1033	103.3	321.048	322.221
1034	103.4	335	322.221
1035	103.5	321.095	322.221
1036	103.6	322.571	322.221
1037	103.7	295.048	322.221
1038	103.8	303.952	322.221
1039	103.9	308.619	322.221
1040	104	329.286	322.221
1041	104.1	319	322.221
1042	104.2	327.095	322.221
1043	104.3	340.619	322.221
1044	104.4	364	322.221
1045	104.5	374.857	322.221
1046	104.6	326.095	322.221
1047	104.7	344.81	322.221
1048	104.8	300.952	322.221
1049	104.9	319.619	322.221
1050	105	304	322.221
1051	105.1	325.286	322.221
1052	105.2	297.952	322.221
1053	105.3	347.286	322.221
1054	105.4	401.381	407.53
1055	105.5	419.476	407.53
1056	105.6	425.429	407.53
1057	105.7	360.095	322.221
1058	105.8	327.952	322.221
1059	105.9	321.381	322.221
1060	106	322.524	322.221
1061	106.1	297.571	322.221
1062	106.2	316.905	322.221
1063	106.3	275.286	322.221
1064	106.4	319.143	322.221
1065	106.5	328.714	322.221
1066	106.6	332.143	322.221
1067	106.7	324.81	322.221
1068	106.8	358.381	322.221
1069	106.9	295	322.221
1070	107	339.476	322.221
1071	107.1	315.762	322.221
1072	107.2	311.476	322.221
1073	107.3	305.667	322.221
1074	107.4	315.143	322.221
1075	107.5	316.905	322.221
1076	107.6	326.524	322.221
1077	107.7	323.381	322.221
1078	107.8	323.952	322.221
1079	107.9	311.143	322.221
1080	108	328.048	322.221
1081	108.1	329.524	322.221
1082	108.2	294.286	322.221
1083	108.3	298.238	322.221
1084	108.4	346	322.221
1085	108.5	392.476	407.53
1086	108.6	364.524	407.53
1087	108.7	346.762	407.53
1088	108.8	386.476	407.53
1089	108.9	417.476	407.53
1090	109	421.619	407.53
1091	109.1	419.048	407.53
1092	109.2	378.333	407.53
1093	109.3	445.857	407.53
1094	109.4	380.095	407.53
1095	109.5	388.905	407.53
1096	109.6	391.095	407.53
1097	109.7	368.095	407.53
1098	109.8	364.667	407.53
1099	109.9	398.619	407.53
1100	110	389.238	407.53
1101	110.1	487.905	493.112
1102	110.2	470.333	493.112
1103	110.3	488.762	493.112
1104	110.4	565.381	585.307
1105	110.5	627.143	585.307
1106	110.6	614.476	585.307
1107	110.7	545.619	585.307
1108	110.8	577.333	585.307
1109	110.9	579.952	585.307
1110	111	611.048	585.307
1111	111.1	530.762	585.307
1112	111.2	566.619	585.307
1113	111.3	519.381	585.307
1114	111.4	582.381	585.307
1115	111.5	571.714	585.307
1116	111.6	590.762	585.307
1117	111.7	573.619	585.307
1118	111.8	678.619	682.575
1119	111.9	659.667	682.575
1120	112	681.81	682.575
1121	112.1	587.143	585.307
1122	112.2	593	585.307
1123	112.3	621.048	585.307
1124	112.4	578.19	585.307
1125	112.5	548.857	585.307
1126	112.6	536.619	585.307
1127	112.7	575.571	585.307
1128	112.8	548.905	585.307
1129	112.9	593.81	585.307
1130	113	579.286	585.307
1131	113.1	602.81	585.307
1132	113.2	539.476	585.307
1133	113.3	559.19	585.307
1134	113.4	530.619	585.307
1135	113.5	555.333	585.307
1136	113.6	487.429	493.112
1137	113.7	451.238	493.112
1138	113.8	538.524	493.112
1139	113.9	500.095	493.112
1140	114	482.238	493.112
1141	114.1	464.857	493.112
1142	114.2	528.762	493.112
1143	114.3	507.381	493.112
1144	114.4	503	493.112
1145	114.5	488.905	493.112
1146	114.6	484.905	493.112
1147	114.7	524.19	493.112
1148	114.8	439.238	407.53
1149	114.9	381.048	407.53
1150	115	402.476	407.53
1151	115.1	388.381	407.53
1152	115.2	410.333	407.53
1153	115.3	365.048	407.53
1154	115.4	351.81	407.53
1155	115.5	403.095	407.53
1156	115.6	487.619	493.112
1157	115.7	493.81	493.112
1158	115.8	466.714	493.112
1159	115.9	426.238	407.53
1160	116	428.19	407.53
1161	116.1	400.81	407.53
1162	116.2	445	407.53
1163	116.3	404.857	407.53
1164	116.4	428.857	407.53
1165	116.5	406.667	407.53
1166	116.6	411.048	407.53
1167	116.7	422.476	407.53
1168	116.8	419.714	407.53
1169	116.9	415.81	407.53
1170	117	436.095	407.53
1171	117.1	402.429	407.53
1172	117.2	399.333	407.53
1173	117.3	417.286	407.53
1174	117.4	402.286	407.53
1175	117.5	380.952	407.53
1176	117.6	425.238	407.53
1177	117.7	416.952	407.53
1178	117.8	423.095	407.53
1179	117.9	397.667	407.53
1180	118	598.857	585.307
1181	118.1	753.333	682.575
1182	118.2	699.238	682.575
1183	118.3	668.667	682.575
1184	118.4	715.476	682.575
1185	118.5	647.762	682.575
1186	118.6	750.762	682.575
1187	118.7	582.571	585.307
1188	118.8	459.762	493.112
1189	118.9	632.952	682.575
1190	119	729.524	682.575
1191	119.1	639.429	682.575
1192	119.2	386.286	407.53
1193	119.3	404.571	407.53
1194	119.4	418.19	407.53
1195	119.5	470.905	407.53
1196	119.6	405.857	407.53
1197	119.7	492.333	493.112
1198	119.8	467.81	493.112
1199	119.9	465.286	493.112
1200	120	493.952	493.112
1201	120.1	439.952	493.112
1202	120.2	511.619	493.112
1203	120.3	460	493.112
1204	120.4	498.095	493.112
1205	120.5	474.429	493.112
1206	120.6	507.905	493.112
1207	120.7	544.905	585.307
1208	120.8	577.571	585.307
1209	120.9	598.81	585.307
1210	121	528	585.307
1211	121.1	577.381	585.307
1212	121.2	560.143	585.307
1213	121.3	535.286	585.307
1214	121.4	577.048	585.307
1215	121.5	588.143	585.307
1216	121.6	553.571	585.307
1217	121.7	507.952	493.112
1218	121.8	495.238	493.112
1219	121.9	524.429	493.112
1220	122	484	493.112
1221	122.1	504.81	493.112
1222	122.2	441.619	493.112
1223	122.3	515	493.112
1224	122.4	498.143	493.112
1225	122.5	494.429	493.112
1226	122.6	536	493.112
1227	122.7	485.238	493.112
1228	122.8	483.19	493.112
1229	122.9	475.762	493.112
1230	123	426.667	493.112
1231	123.1	502.571	493.112
1232	123.2	518.048	493.112
1233	123.3	514.333	493.112
1234	123.4	498.524	493.112
1235	123.5	483.524	493.112
1236	123.6	590.905	493.112
1237	123.7	467.19	493.112
1238	123.8	465.524	493.112
1239	123.9	502.905	493.112
1240	124	492.714	493.112
1241	124.1	498.952	493.112
1242	124.2	505.81	493.112
1243	124.3	518.476	493.112
1244	124.4	492.143	493.112
1245	124.5	536.476	493.112
1246	124.6	463.143	493.112
1247	124.7	517.952	493.112
1248	124.8	481	493.112
1249	124.9	491.905	493.112
1250	125	497.762	493.112
1251	125.1	522.381	493.112
1252	125.2	468.286	493.112
1253	125.3	499.286	493.112
1254	125.4	439.571	493.112
1255	125.5	482.143	493.112
1256	125.6	483	493.112
1257	125.7	419	493.112
1258	125.8	435.524	493.112
1259	125.9	490.952	493.112
1260	126	512.571	493.112
1261	126.1	513.476	493.112
1262	126.2	525.619	493.112
1263	126.3	522.952	493.112
1264	126.4	465.333	493.112
1265	126.5	490.952	493.112
1266	126.6	458.524	493.112
1267	126.7	431.286	493.112
1268	126.8	512.81	493.112
1269	126.9	480.333	493.112
1270	127	451.857	493.112
1271	127.1	490.143	493.112
1272	127.2	472.667	493.112
1273	127.3	495.905	493.112
1274	127.4	559.81	585.307
1275	127.5	569.905	585.307
1276	127.6	501.429	585.307
1277	127.7	550.429	585.307
1278	127.8	558.762	585.307
1279	127.9	566.619	585.307
1280	128	590.667	585.307
1281	128.1	540.905	585.307
1282	128.2	543.762	585.307
1283	128.3	597.667	585.307
1284	128.4	564.619	585.307
1285	128.5	491.429	493.112
1286	128.6	501	493.112
1287	128.7	559.429	493.112
1288	128.8	413.905	407.53
1289	128.9	382.667	407.53
1290	129	392	407.53
1291	129.1	395.238	407.53
1292	129.2	409.857	407.53
1293	129.3	356.905	407.53
1294	129.4	398.238	407.53
1295	129.5	419.429	407.53
1296	129.6	361.524	407.53
1297	129.7	418.667	407.53
1298	129.8	396.714	407.53
1299	129.9	422.238	407.53
1300	130	421.238	407.53
1301	130.1	396.429	407.53
1302	130.2	397.476	407.53
1303	130.3	394.952	407.53
1304	130.4	436.571	407.53
1305	130.5	395.19	407.53
1306	130.6	419.286	407.53
1307	130.7	382	407.53
1308	130.8	411.524	407.53
1309	130.9	367.857	407.53
1310	131	374.667	407.53
1311	131.1	363.857	407.53
1312	131.2	386.714	407.53
1313	131.3	420.571	407.53
1314	131.4	388.762	407.53
1315	131.5	472.238	493.112
1316	131.6	484.905	493.112
1317	131.7	488.905	493.112
1318	131.8	485.286	493.112
1319	131.9	501.952	493.112
1320	132	479.143	493.112
1321	132.1	542.714	493.112
1322	132.2	502.095	493.112
1323	132.3	447	493.112
1324	132.4	534.048	493.112
1325	132.5	476.762	493.112
1326	132.6	449.048	493.112
1327	132.7	475.19	493.112
1328	132.8	518.333	493.112
1329	132.9	540.619	493.112
1330	133	556.762	493.112
1331	133.1	521.286	493.112
1332	133.2	469.524	493.112
1333	133.3	466.524	493.112
1334	133.4	478.19	493.112
1335	133.5	440.619	493.112
1336	133.6	475.667	493.112
1337	133.7	504.667	493.112
1338	133.8	484	493.112
1339	133.9	509.238	493.112
1340	134	469.952	493.112
1341	134.1	485.571	493.112
1342	134.2	516.905	493.112
1343	134.3	539.667	493.112
1344	134.4	505	493.112
1345	134.5	459.952	493.112
1346	134.6	474.143	493.112
1347	134.7	506.381	493.112
1348	134.8	487.81	493.112
1349	134.9	528.143	493.112
1350	135	571.762	585.307
1351	135.1	541.524	585.307
1352	135.2	546.81	585.307
1353	135.3	550.571	585.307
1354	135.4	515.952	585.307
1355	135.5	571.714	585.307
1356	135.6	598.381	585.307
1357	135.7	573.619	585.307
1358	135.8	593.81	585.307
1359	135.9	595.762	585.307
1360	136	551.857	585.307
1361	136.1	622.619	585.307
1362	136.2	569.571	585.307
1363	136.3	592.476	585.307
1364	136.4	591.524	585.307
1365	136.5	576.429	585.307
1366	136.6	614.81	585.307
1367	136.7	587.762	585.307
1368	136.8	592.571	585.307
1369	136.9	600.714	585.307
1370	137	570.333	585.307
1371	137.1	563.19	585.307
1372	137.2	574.476	585.307
1373	137.3	550.905	585.307
1374	137.4	570.19	585.307
1375	137.5	599.19	585.307
1376	137.6	605.476	585.307
1377	137.7	615.095	585.307
1378	137.8	625.524	585.307
1379	137.9	664.143	585.307
1380	138	603.952	585.307
1381	138.1	663.524	585.307
1382	138.2	603.429	585.307
1383	138.3	648.619	585.307
1384	138.4	558.571	585.307
1385	138.5	584.762	585.307
1386	138.6	436.81	493.112
1387	138.7	483.381	493.112
1388	138.8	518.905	493.112
1389	138.9	405.476	407.53
1390	139	380.333	407.53
1391	139.1	376.857	407.53
1392	139.2	422.905	407.53
1393	139.3	406.333	407.53
1394	139.4	405.81	407.53
1395	139.5	442.571	407.53
1396	139.6	483.857	493.112
1397	139.7	487.048	493.112
1398	139.8	490.905	493.112
1399	139.9	581.048	585.307
1400	140	693.571	585.307
1401	140.1	589.619	585.307
1402	140.2	487.952	493.112
1403	140.3	504.286	493.112
1404	140.4	567.952	493.112
1405	140.5	516.333	493.112
1406	140.6	498	493.112
1407	140.7	465.714	493.112
1408	140.8	496	493.112
1409	140.9	468.81	493.112
1410	141	497.095	493.112
1411	141.1	436.81	493.112
1412	141.2	495.476	493.112
1413	141.3	505.048	493.112
1414	141.4	553.048	585.307
1415	141.5	569.095	585.307
1416	141.6	594.952	585.307
1417	141.7	613.857	585.307
1418	141.8	578.286	585.307
1419	141.9	570.476	585.307
1420	142	512.286	493.112
1421	142.1	496.667	493.112
1422	142.2	529.333	493.112
1423	142.3	580.857	493.112
1424	142.4	511.476	493.112
1425	142.5	475.762	493.112
1426	142.6	476.19	493.112
1427	142.7	540.095	493.112
1428	142.8	505.286	493.112
1429	142.9	495.381	493.112
1430	143	466.857	493.112
1431	143.1	482.333	493.112
1432	143.2	487.143	493.112
1433	143.3	479.429	493.112
1434	143.4	482.143	493.112
1435	143.5	488.571	493.112
1436	143.6	447.762	493.112
1437	143.7	529.143	493.112
1438	143.8	476.524	493.112
1439	143.9	459.095	493.112
1440	144	449.429	493.112
1441	144.1	531.048	493.112
1442	144.2	517.667	493.112
1443	144.3	484.952	493.112
1444	144.4	402.048	407.53
1445	144.5	372.476	407.53
1446	144.6	410.81	407.53
1447	144.7	472.905	493.112
1448	144.8	521.19	493.112
1449	144.9	526.048	493.112
1450	145	511.143	493.112
1451	145.1	498.762	493.112
1452	145.2	374.238	407.53
1453	145.3	451.905	407.53
1454	145.4	415.476	407.53
1455	145.5	397.762	407.53
1456	145.6	389.762	407.53
1457	145.7	366.619	407.53
1458	145.8	435.952	407.53
1459	145.9	427.81	407.53
1460	146	372	407.53
1461	146.1	390.143	407.53
1462	146.2	411.333	407.53
1463	146.3	382.81	407.53
1464	146.4	401.381	407.53
1465	146.5	408.524	407.53
1466	146.6	402.762	407.53
1467	146.7	393.905	407.53
1468	146.8	372.762	407.53
1469	146.9	361.476	407.53
1470	147	382.81	407.53
1471	147.1	456.476	407.53
1472	147.2	418.762	407.53
1473	147.3	406.429	407.53
1474	147.4	410	407.53
1475	147.5	439.524	407.53
1476	147.6	462.857	493.112
1477	147.7	484.095	493.112
1478	147.8	507.952	493.112
1479	147.9	485.095	493.112
1480	148	572.429	493.112
1481	148.1	546.333	493.112
1482	148.2	523.476	493.112
1483	148.3	474.19	493.112
1484	148.4	501.333	493.112
1485	148.5	486.667	493.112
1486	148.6	449.048	493.112
1487	148.7	543.81	493.112
1488	148.8	484.429	493.112
1489	148.9	484.333	493.112
1490	149	470.381	493.112
1491	149.1	462.476	493.112
1492	149.2	515.81	493.112
1493	149.3	481.667	493.112
1494	149.4	487.762	493.112
1495	149.5	488.714	493.112
1496	149.6	467.619	493.112
1497	149.7	407.333	407.53
1498	149.8	396.143	407.53
1499	149.9	433.048	407.53
1500	150	388.857	407.53
1501	150.1	433.905	407.53
1502	150.2	476.714	407.53
1503	150.3	407.81	407.53
1504	150.4	489.762	493.112
1505	150.5	460.048	493.112
1506	150.6	432.238	493.112
1507	150.7	441.238	493.112
1508	150.8	476.714	493.112
1509	150.9	484.81	493.112
1510	151	437.429	493.112
1511	151.1	429.19	493.112
1512	151.2	482.429	493.112
1513	151.3	398.429	493.112
1514	151.4	451	493.112
1515	151.5	477.667	493.112
1516	151.6	475.238	493.112
1517	151.7	458.857	493.112
1518	151.8	506.286	493.112
1519	151.9	454.476	493.112
1520	152	489.048	493.112
1521	152.1	438.381	493.112
1522	152.2	507.238	493.112
1523	152.3	455.762	493.112
1524	152.4	491.333	493.112
1525	152.5	496.952	493.112
1526	152.6	491.952	493.112
1527	152.7	524.238	493.112
1528	152.8	518.619	493.112
1529	152.9	494.381	493.112
1530	153	472.571	493.112
1531	153.1	488.476	493.112
1532	153.2	505.286	493.112
1533	153.3	471.714	493.112
1534	153.4	461.857	493.112
1535	153.5	452.762	493.112
1536	153.6	361.905	407.53
1537	153.7	432.762	407.53
1538	153.8	436.238	407.53
1539	153.9	400.286	407.53
1540	154	396.619	407.53
1541	154.1	399.762	407.53
1542	154.2	388.952	407.53
1543	154.3	413.857	407.53
1544	154.4	416.19	407.53
1545	154.5	381.81	407.53
1546	154.6	412.905	407.53

## Sheet: Figure 5c
Summary
Ligands Bound	Occupancy	Binomial Fit*		*B(k = 4, p = 0.3120)
0	22.859	22.4071
1	40.4232	40.643
2	26.8805	27.6451
3	8.7387	8.35735
4	1.09862	0.947436
Raw Counts
Trajectory #	Occupancy per Liganded State
	0	1	2	3	4
1	0.102412	0.495904	0.292672	0.094447	0.0145653
2	0.0688468	0.0189329	0.387263	0.490534	0.0344234
3	0.070284	0.385288	0.407866	0.104151	0.0324108
4	0.329034	0.425915	0.232753	0.0122975	0
5	0.221	0.578875	0.138375	0.060125	0.001625
6	0.172599	0.544702	0.276904	0.00538079	0.000413907
7	0.0101824	0.126432	0.787442	0.0742469	0.00169707
8	0.0382476	0.773992	0.162378	0.0253825	0
9	0.337553	0.140084	0.190717	0.180591	0.151055
10	0.192187	0.289105	0.408769	0.109445	0.000494478
11	0.0448	0.2464	0.3824	0.3184	0.008
12	0.233703	0.436767	0.250743	0.0656558	0.0131312
13	0.0426318	0.480363	0.38335	0.0902988	0.00335683
14	0.248375	0.452375	0.269625	0.029625	0
15	0.194388	0.416836	0.378972	0.00980392	0
16	0.315452	0.564852	0.116493	0.00320256	0
17	0.20075	0.471	0.317875	0.010375	0
18	0.194708	0.600513	0.197472	0.00730648	0
19	0.0187707	0.672433	0.299963	0.00883327	0
20	0.308245	0.574797	0.114616	0.00234229	0
21	0.0836727	0.304702	0.466864	0.14365	0.0011107
22	0.140187	0.445004	0.374551	0.0402588	0
23	0.261426	0.329068	0.357404	0.0521024	0
24	0.19525	0.335875	0.294125	0.148875	0.025875
25	0.531625	0.301625	0.133875	0.032875	0
26	0.0175781	0.227539	0.413086	0.242188	0.0996094
27	0.189758	0.308263	0.464127	0.0378525	0
28	0.213189	0.454381	0.32701	0.00542005	0
29	0.00810537	0.126646	0.442418	0.345491	0.0773387
30	0.0327075	0.312538	0.441551	0.213204	0
31	0.0308483	0.0205656	0.277635	0.303342	0.367609
32	0.0676487	0.616476	0.234588	0.0812875	0
33	0.118217	0.617192	0.261234	0.00335633	0
34	0.0158073	0.27324	0.488897	0.211517	0.0105382
35	0.196759	0.606192	0.158275	0.0387731	0
36	0.116117	0.250515	0.394954	0.168126	0.0702884
37	0.0298429	0.091623	0.483246	0.318325	0.0769634
38	0.120722	0.265209	0.362167	0.202471	0.0494297
39	0.0506152	0.328579	0.380313	0.229027	0.0114653
40	0.106122	0.383673	0.331195	0.179009	0
41	0.121895	0.432698	0.443674	0.0017331	0
42	0.368684	0.114292	0.423336	0.0923878	0.00130124
43	0.151385	0.39446	0.339274	0.0992055	0.0156753
44	0.360279	0.225928	0.318447	0.0736763	0.0216695
45	0.233761	0.221651	0.338349	0.206239	0
46	0.401386	0.420733	0.13341	0.0444701	0
47	0.144152	0.353583	0.451812	0.050453	0
48	0.0723039	0.167402	0.440441	0.282108	0.0377451
49	0.0540541	0.482759	0.326654	0.106477	0.0300559
50	0.162378	0.415262	0.350488	0.0718722	0
51	0.388708	0.413891	0.195573	0.00182778	0
52	0.00966608	0.461775	0.234183	0.204745	0.0896309
53	0.0515848	0.314481	0.348042	0.228713	0.0571784
54	0.314	0.395125	0.213875	0.077	0
55	0.211111	0.465812	0.262821	0.0602564	0
56	0.143125	0.3005	0.289625	0.216125	0.050625
57	0.114027	0.395098	0.360681	0.125674	0.00451938
58	0.130253	0.541609	0.270248	0.0578903	0
59	0.0785517	0.378337	0.387542	0.155569	0
60	0.267583	0.380558	0.278092	0.0737672	0
61	0.169125	0.527375	0.2475	0.056	0
62	0.217956	0.602185	0.15062	0.029238	0
63	0.208448	0.416896	0.291093	0.0835629	0
64	0.137312	0.380398	0.349345	0.124697	0.00824842
65	0.119756	0.166285	0.483219	0.210145	0.020595
66	0.290013	0.267771	0.314871	0.0976886	0.0296555
67	0.146604	0.449899	0.268998	0.134499	0
68	0.012093	0.36	0.407442	0.220465	0
69	0.0579135	0.387148	0.367315	0.177707	0.0099167
70	0.322375	0.31875	0.177	0.181875	0
71	0.120837	0.503964	0.295592	0.0675547	0.012052
72	0.0234628	0.0776699	0.700647	0.122977	0.0752427
73	0.277476	0.47412	0.203025	0.0453793	0
74	0.419544	0.296608	0.222606	0.0612429	0
75	0.186658	0.508628	0.244108	0.0606061	0
76	0.0838762	0.373507	0.304017	0.235885	0.00271444
77	0.293667	0.469729	0.195546	0.0375783	0.00347947
78	0.38225	0.372125	0.18475	0.060875	0
79	0.380553	0.12463	0.397088	0.0977295	0
80	0.0641115	0.341463	0.450871	0.143554	0
81	0.11	0.491	0.277	0.122	0
82	0.036286	0.167022	0.353255	0.338314	0.105123
83	0.445435	0.2862	0.204246	0.0641189	0
84	0.0996214	0.227934	0.5001	0.158996	0.0133493
85	0.132139	0.495759	0.310462	0.0582469	0.00339303
86	0.295625	0.4445	0.172625	0.074	0.01325
87	0.424149	0.402758	0.162398	0.0106952	0
88	0.347566	0.450519	0.186752	0.0151636	0
89	0.340125	0.537625	0.11675	0.0055	0
90	0.2755	0.494	0.17475	0.05575	0
91	0.288309	0.418258	0.27946	0.013973	0
92	0.210545	0.415152	0.271909	0.07684	0.0255534
93	0.38175	0.34125	0.20125	0.07575	0
94	0.169822	0.0643591	0.309356	0.378583	0.0778799
95	0.38944	0.41312	0.16352	0.03104	0.00288
96	0.1191	0.286136	0.279867	0.254056	0.0608407
97	0.24	0.430625	0.254	0.059125	0.01625
98	0.163241	0.37751	0.358375	0.0852823	0.0155918
99	0.519375	0.373048	0.093503	0.0140736	0
100	0.0307798	0.792294	0.121979	0.0549476	0
101	0.152527	0.359707	0.359886	0.126987	0.000893017
102	0.274245	0.548912	0.172407	0.00443693	0
103	0.099046	0.37037	0.371493	0.159091	0
104	0.18125	0.075625	0.5735	0.169625	0
105	0.130706	0.267655	0.506828	0.0948108	0
106	0.368625	0.346625	0.139125	0.119875	0.02575
107	0.25575	0.461125	0.231125	0.0515	0.0005
108	0.124018	0.375	0.346531	0.114856	0.0395942
109	0.166	0.371	0.251125	0.15925	0.052625
110	0.107882	0.343262	0.396295	0.152561	0
111	0.54275	0.373	0.07775	0.0065	0
112	0.170375	0.487878	0.234806	0.106941	0
113	0.23625	0.540625	0.18675	0.034125	0.00225
114	0.278344	0.43482	0.207219	0.0796178	0
115	0.29919	0.46412	0.159144	0.0775463	0
116	0.031878	0.536383	0.232155	0.162162	0.037422
117	0.0936387	0.145547	0.446819	0.279389	0.0346056
118	0.0322974	0.290067	0.387569	0.28702	0.00304692
119	0.0928302	0.244906	0.382264	0.172075	0.107925
120	0.146941	0.353729	0.374498	0.124833	0
121	0.167593	0.279607	0.444207	0.108593	0
122	0.131264	0.292683	0.427494	0.142794	0.00576497
123	0.227137	0.425944	0.270875	0.0760437	0
124	0.155097	0.406415	0.289543	0.148946	0
125	0.0925606	0.253028	0.45891	0.139273	0.0562284
126	0.226213	0.419797	0.204277	0.149712	0
127	0.00637552	0.605993	0.260121	0.116991	0.0105196
128	0.329875	0.413875	0.233375	0.021625	0.00125
129	0.215	0.380625	0.2325	0.171875	0
130	0.153574	0.359627	0.177077	0.215068	0.0946555
131	0.338	0.4725	0.17575	0.01375	0
132	0.113659	0.334677	0.337198	0.157762	0.0567036
133	0.0257168	0.150754	0.554537	0.268992	0
134	0.338532	0.450659	0.201667	0.00914224	0
135	0.303399	0.446518	0.143119	0.0974675	0.00949683
136	0.213888	0.533096	0.230127	0.022889	0
137	0.335229	0.407267	0.206319	0.0511848	0
138	0.4585	0.424125	0.105375	0.012	0
139	0.225875	0.374375	0.367625	0.031	0.001125
140	0.170538	0.439377	0.324646	0.0651558	0.000283286
141	0.125024	0.446127	0.37449	0.0533877	0.000970685
142	0.250492	0.520945	0.226595	0.00196795	0
143	0.37025	0.432875	0.1775	0.019375	0
144	0.14569	0.345538	0.398424	0.110348	0
145	0.255125	0.439125	0.280875	0.0245	0.000375
146	0.269743	0.371307	0.29021	0.0681599	0.000579262
147	0.29975	0.325	0.271875	0.1025	0.000875
148	0.065661	0.383762	0.472493	0.0771961	0.000887311
149	0.22026	0.554373	0.222388	0.00297936	0
150	0.36425	0.454125	0.1785	0.003125	0
151	0.254625	0.392875	0.35125	0.00125	0
152	0.331121	0.368281	0.249502	0.0510949	0
153	0.047349	0.304809	0.469051	0.178792	0
154	0.319	0.519	0.145375	0.016625	0
155	0.24925	0.498625	0.203625	0.0485	0
156	0.146625	0.627625	0.22375	0.002	0
157	0.172898	0.234925	0.196672	0.184137	0.211368
158	0.145563	0.681456	0.16002	0.0129611	0
159	0.0295175	0.222023	0.448152	0.280801	0.0195072
160	0.0564885	0.287532	0.492875	0.163104	0
161	0.0568032	0.173052	0.284016	0.384412	0.101717
162	0.0919698	0.424846	0.4372	0.0459849	0
163	0.185444	0.485007	0.15575	0.152547	0.0212518
164	0.1175	0.40625	0.36025	0.104875	0.011125
165	0.0286225	0.30322	0.389982	0.27102	0.00715564
166	0.167476	0.296456	0.370031	0.154164	0.0118726
167	0.0735786	0.341137	0.409281	0.172659	0.00334448
168	0.439054	0.392497	0.136507	0.0295314	0.00241073
169	0.3775	0.40175	0.127	0.06975	0.024
170	0.112	0.5195	0.273875	0.082875	0.01175
171	0.190005	0.331024	0.427264	0.0517071	0
172	0.0586081	0.551282	0.250305	0.139805	0
173	0.148896	0.266877	0.292744	0.231125	0.0603575
174	0.0532951	0.226361	0.382808	0.279083	0.0584527
175	0.162199	0.478202	0.30111	0.058489	0
176	0.0456598	0.225289	0.579027	0.150025	0
177	0.0495	0.315625	0.2855	0.209	0.140375
178	0.0248714	0.263293	0.30446	0.407376	0
179	0.0483921	0.112707	0.377146	0.373088	0.0886669
180	0.13075	0.4175	0.32475	0.105375	0.021625
181	0.084375	0.339375	0.520938	0.0553125	0
182	0.333	0.434	0.14125	0.067	0.02475
183	0.34525	0.48275	0.17025	0.00175	0
184	0.0771903	0.308954	0.504245	0.108645	0.000964878
185	0.0485777	0.0757112	0.423632	0.451204	0.000875274
186	0.0456148	0.251918	0.347709	0.338171	0.0165872
187	0.0217984	0.0454133	0.22525	0.518619	0.188919
188	0.255375	0.3955	0.224125	0.125	0
189	0.52025	0.34925	0.124375	0.006125	0
190	0.190527	0.614129	0.195076	0.000267594	0
191	0.17043	0.688377	0.138341	0.00285239	0
192	0.349875	0.4835	0.10775	0.05775	0.001125
193	0.314568	0.536296	0.136626	0.0118519	0.000658436
194	0.186288	0.357341	0.324792	0.131579	0
195	0.10575	0.37	0.358875	0.128875	0.0365
196	0.253	0.470125	0.22775	0.04525	0.003875
197	0.148704	0.223738	0.375171	0.252387	0
198	0.160908	0.327739	0.32231	0.189042	0
199	0.25915	0.489965	0.194805	0.0560803	0
200	0.296251	0.503995	0.157652	0.0381069	0.00399508
201	0.108093	0.434546	0.326453	0.130907	0
202	0.295625	0.379375	0.2685	0.04075	0.01575
203	0.339101	0.391012	0.197789	0.0713771	0.000720981
204	0.136299	0.622175	0.228107	0.0134181	0
205	0.0522876	0.475257	0.337768	0.104809	0.0298786
206	0.409568	0.425934	0.158204	0.00629459	0
207	0.361709	0.309465	0.275353	0.0534726	0
208	0.23764	0.418539	0.269101	0.0747191	0
209	0.127329	0.21118	0.477226	0.184265	0
210	0.323735	0.509255	0.129165	0.0361991	0.00164541
211	0.217	0.588691	0.172339	0.0219701	0
212	0.487486	0.443647	0.0634465	0.00542005	0
213	0.27425	0.559875	0.128875	0.033125	0.003875
214	0.230715	0.492923	0.196037	0.0721868	0.00813871
215	0.20332	0.41586	0.350392	0.0304288	0
216	0.28625	0.423625	0.216875	0.0685	0.00475
217	0.468544	0.251068	0.202913	0.076699	0.000776699
218	0.404299	0.377061	0.161201	0.0557717	0.00166759
219	0.456625	0.42175	0.118375	0.00325	0
220	0.216606	0.472804	0.203536	0.106093	0.000960984
221	0.283685	0.446839	0.205067	0.0644092	0
222	0.205944	0.502951	0.231029	0.0600759	0
223	0.157625	0.4265	0.338625	0.07725	0
224	0.0880132	0.446909	0.320906	0.144172	0
225	0.216806	0.379577	0.320026	0.0835906	0
226	0.093125	0.624125	0.1955	0.08725	0
227	0.131395	0.496319	0.311308	0.0577685	0.00320936
228	0.244396	0.107473	0.541319	0.106813	0
229	0.00551471	0.0128676	0.119485	0.667279	0.194853
230	0.0397456	0.205087	0.254372	0.330684	0.170111
231	0.116494	0.296967	0.276257	0.253328	0.0569527
232	0.0409704	0.0975741	0.56442	0.261995	0.0350404
233	0.212824	0.555153	0.223872	0.0081507	0
234	0.00183824	0.57598	0.265319	0.156863	0
235	0.188342	0.621508	0.188342	0.00180905	0
236	0.270053	0.54328	0.182011	0.00465608	0
237	0.285875	0.461871	0.248497	0.00375657	0
238	0.27025	0.440125	0.2075	0.081625	0.0005
239	0.200652	0.445289	0.253869	0.10019	0
240	0.18825	0.407125	0.265375	0.10725	0.032
241	0.0537084	0.441603	0.390452	0.114237	0
242	0.27003	0.535625	0.142501	0.0518436	0
243	0.127088	0.373403	0.333443	0.166066	0
244	0.00910596	0.157009	0.471026	0.362859	0
245	0.244871	0.332392	0.216638	0.206098	0
246	0.314039	0.447322	0.183803	0.0548363	0
247	0.148589	0.420635	0.284832	0.145944	0
248	0.234572	0.44168	0.240388	0.0833603	0
249	0.0868056	0.245226	0.473958	0.15191	0.0421007
250	0.237758	0.133144	0.520639	0.0969243	0.0115338
251	0.338	0.473625	0.173125	0.01525	0
252	0.152195	0.366909	0.373855	0.105778	0.00126302
253	0.0272593	0.147259	0.54963	0.275852	0
254	0.215701	0.495045	0.266027	0.023227	0
255	0.0959821	0.245536	0.416518	0.221429	0.0205357
256	0.25941	0.314344	0.296033	0.129807	0.000406918
257	0.363253	0.479862	0.151899	0.00498657	0
258	0.228582	0.30113	0.35144	0.0907765	0.0280715
259	0.27956	0.434464	0.266728	0.0192484	0
260	0.0772787	0.299207	0.535667	0.0878468	0
261	0.136003	0.14847	0.527767	0.183226	0.00453343
262	0.0698519	0.14166	0.550433	0.213188	0.0248673
263	0.108788	0.296502	0.414676	0.148038	0.0319966
264	0.46253	0.379461	0.11479	0.0210151	0.0222046
265	0.366152	0.245817	0.261261	0.120978	0.00579151
266	0.0420819	0.151717	0.457364	0.239203	0.109635
267	0.107502	0.33256	0.312452	0.177108	0.070379
268	0.35548	0.303237	0.222033	0.11925	0
269	0.28691	0.308029	0.348554	0.0546043	0.00190259
270	0.258531	0.326007	0.279545	0.135917	0
271	0.213048	0.400663	0.263914	0.122374	0
272	0.216406	0.471108	0.270564	0.0387492	0.00317245
273	0.0881671	0.136118	0.324053	0.262181	0.189482
274	0.192065	0.2267	0.287154	0.178212	0.115869
275	0.346539	0.414696	0.20639	0.0323749	0
276	0.321764	0.45987	0.19812	0.0202458	0
277	0.133041	0.329404	0.388009	0.149545	0
278	0.439375	0.200125	0.319375	0.041125	0
279	0.382615	0.449131	0.14966	0.0185941	0
280	0.295369	0.367021	0.257822	0.0797872	0
281	0.335531	0.421645	0.214119	0.0287044	0
282	0.217609	0.56514	0.188618	0.0257695	0.00286328
283	0.114928	0.61312	0.222107	0.049845	0
284	0.160829	0.687277	0.139028	0.0128663	0
285	0.269376	0.379137	0.293674	0.0578132	0
286	0.23088	0.35101	0.267316	0.138528	0.0122655
287	0.0778351	0.563144	0.320619	0.0384021	0
288	0.151997	0.340933	0.490456	0.0166136	0
289	0.25125	0.5935	0.154375	0.000875	0
290	0.404195	0.47333	0.113672	0.00880373	0
291	0.157972	0.637489	0.200118	0.00442087	0
292	0.342728	0.280346	0.285983	0.0841789	0.00676437
293	0.0507117	0.343416	0.414591	0.191281	0
294	0.217545	0.502395	0.245526	0.0345349	0
295	0.0212121	0.1	0.559091	0.319697	0
296	0.0491591	0.285899	0.425614	0.189521	0.049806

## Sheet: Figure 5-figure supplement 1
Number of States found on full dataset
DISC	STaSI
6	3
4	3
5	4
3	1
6	7
8	6
3	10
6	15
3	7
7	11
11	13
6	3
4	10
7	3
8	15
6	18
5	3
4	2
4	9
5	4
4	8
4	14
6	7
5	12
4	8
6	9
9	22
8	10
3	3
2	4
4	1
5	9
4	8
5	14
5	14
3	5
3	2
5	4
6	5
4	12
4	5
4	9
4	3
4	9
8	9
4	5
8	8
5	6
5	11
5	3
7	17
8	4
6	7
6	14
6	12
4	9
4	5
3	4
6	4
6	7
8	2
3	4
7	6
5	8
6	20
4	8
6	5
5	12
7	14
7	6
5	12
4	4
2	5
4	16
4	6
4	4
4	10
5	10
5	6
6	5
6	18
4	6
5	6
7	3
5	11
3	4
9	12
8	12
3	7
6	2
3	5
5	5
4	6
5	8
4	3
4	4
7	12
7	22
3	7
3	5
5	4
5	5
8	11
5	6
4	9
3	4
5	3
5	4
6	4
7	8
4	4
5	7
4	8
4	11
4	4
6	10
5	5
4	13
5	3
4	3
4	11
5	6
5	9
5	5
5	8
6	3
10	8
4	9
4	5
5	4
4	2
4	9
5	6
4	1
5	2
4	2
5	4
6	7
4	4
7	8
4	8
7	6
4	6
6	11
5	5
5	13
5	4
4	1
8	2
4	2
4	8
3	3
4	2
4	5
3	2
5	12
4	5
2	4
5	3
5	14
2	2
6	8
5	6
7	6
7	10
7	5
4	7
6	9
5	5
6	7
7	9
3	9
9	10
8	7
4	8
6	3
6	8
7	23
5	12
7	9
6	2
5	9
8	6
2	2
2	4
6	2
7	15
4	8
4	7
3	2
3	5
7	16
5	8
5	7
6	6
2	5
3	3
5	9
5	3
4	5
4	5
4	11
5	6
5	2
5	4
5	5
5	6
5	6
3	5
3	5
4	7
7	8
5	9
5	5
4	6
5	6
5	5
7	13
5	4
9	5
4	7
6	8
4	7
6	6
4	6
5	16
4	7
2	4
4	4
5	13
5	11
6	13
4	8
5	15
5	8
4	4
6	10
3	11
4	4
5	8
4	10
5	6
5	7
8	10
4	13
6	7
4	12
4	7
5	8
7	11
5	8
4	5
5	7
7	16
5	9
5	10
7	6
5	5
6	6
5	8
5	8
4	10
4	8
6	8
5	9
7	8
5	3
8	2
5	12
3	11
3	6
7	9
7	22
3	5
5	5
5	6
3	5
5	9
4	1
5	7
4	9
4	9
7	17
3	9
6	8
8	16
4	4
6	16
4	7
10	13
4	4
4	4
6	12
6	11
5	3
4	5
7	10
6	13
4	8
4	2
8	8
3	6
2	6
7	4
6	13
7	7
4	9
6	6
5	3
5	12
6	5
7	13
5	5
3	4
6	4
5	10
5	4
6	2
3	2
4	4
5	8
3	9
4	7
5	12
6	6
5	6
6	5
5	7
5	6
7	8
5	5
7	13
6	7
4	4
3	2
5	2
3	2
5	5
6	5
5	6
7	1
6	7
4	9
7	6
3	2
6	2
3	4
5	12
4	4
4	3
6	8
3	9
3	6
4	8
6	4
5	6
5	8
7	7
7	3
4	5
5	5
5	4
5	5
6	14
3	2
6	3
3	3
6	2
3	4
8	3
4	2
4	6
3	3
4	2
4	3
3	4
5	4
7	2
4	2
4	2
4	5
4	14
6	3
4	4
7	3
7	9
2	4
5	1
5	2
5	1
5	2
6	8
7	5
5	2
3	2
7	4
4	7
3	5
5	4
5	1
6	5
6	12
5	16
5	2
4	1
3	6
5	2
5	5
4	8
5	4
4	2
4	2
5	3
6	10
7	3
4	4
4	4
4	1
5	4
6	3
5	8
4	3
5	14
6	7
4	4
5	3
5	4
4	10
7	3
5	9
3	3
3	3
5	4
3	3
6	4
6	2
4	1
8	3
6	3
4	6
4	2
6	4
5	2
7	2
5	3
5	3
3	6
4	2
5	14
3	3
3	2
5	1
5	3
7	3
6	3
6	3
7	4
5	3
6	9
6	16
4	3
4	4
4	3
7	2
4	6
4	3
3	3
4	5
3	4
4	3
6	4
6	2
4	2
5	2
5	2
6	6
7	4
4	4
3	2
5	4
6	2
5	7
5	3
3	3
4	3
4	2
8	12
4	9
5	3
4	3
6	3
3	2
3	5
4	7
4	7
3	3
4	5
5	3
3	7
4	7
5	8
5	2
7	3
5	3
5	2
5	3
4	7
5	3
4	5
6	3
5	5
6	6
4	4
4	3
5	4
4	2
6	4
5	2
4	8
4	3
5	3
3	9
4	9
3	5
7	8
4	3
5	3
6	4
4	4
4	8
6	1
5	4
5	4
5	3
2	2
5	11
3	3
5	15
4	6
4	2
4	2
6	4
4	3
7	3
3	2
6	4
3	2
4	7
4	3
6	7
4	2
6	4
7	2
5	2
6	3
4	4
5	2
5	4
5	2
5	2
4	3
4	4
7	7
4	3
5	4
5	15
6	4
5	2
4	5
5	2
4	7
4	1
3	4
4	13
7	10
4	15
3	12
6	5
6	3
4	4
4	11
4	10
6	10
4	9
5	3
6	9
7	3
5	3
5	6
5	2
6	6
6	2
4	6
6	4
4	8
8	3
4	9
3	2
2	5
4	2
8	2
5	13
4	5
7	5
5	3
5	3
6	10
6	2
5	2
4	3
7	10
5	2
5	13
7	6
5	9
4	9
4	8
6	12
6	7
4	2
6	11
5	5
7	2
9	7
4	5
4	8
6	2
4	5
4	4
6	10
3	3
5	11
5	3
5	13
4	7
6	7
4	4
5	3
4	4
5	5
2	2
4	5
7	4
5	2
4	3
6	10
6	3
6	4
5	2
3	2
5	5
4	6
4	2
6	10
4	3
6	3
5	3
4	2
4	4
6	4
2	2
7	4
8	2
4	3
5	12
3	3
4	3
4	6
4	5
4	5
4	4
7	11
1	8
3	3
3	2
6	17
3	4
3	6
5	13
3	5
4	5
5	12
4	8
8	14
5	17
3	4
6	14
8	12
5	14
6	14
5	9
10	16
7	7
6	17
5	6
8	27
5	16
7	24
8	10
6	13
6	16
5	11
5	12
7	19
7	14
6	9
5	4
9	20
6	6
8	21
3	5
3	10
4	10
6	13
6	18
9	14
4	4
4	7
4	4
7	9
7	11
5	17
3	5
5	14
4	14
4	12
4	17
5	17
4	10
3	6
4	12
3	8
7	11
8	16
5	4
8	16
6	4
3	9
7	5
5	8
4	6
5	11
6	15
7	10
5	13
5	7
6	7
4	14
6	15
6	14
4	7
6	10
3	11
6	13
4	15
6	4
5	14
7	10
6	16
4	12
5	20
3	11
5	4
5	6
4	12
5	10
4	8
10	20
4	16
3	5
4	10
1	3
3	5
5	12
6	12
4	14
6	10
5	7
7	14
3	4
5	15
4	8
5	4
5	10
6	12
3	11
4	5
5	6
4	5
6	13
7	7
5	8
6	9
6	8
7	7
4	7
8	16
3	5
5	21
5	12
7	16
5	6
9	14
4	9
5	7
5	13
8	17
4	9
8	19
7	16
8	29
6	10
3	11
6	17
5	7
7	6
5	11
8	18
5	10
8	14
7	7
8	20
5	12
5	4
4	10
3	12
6	8
3	12
6	22
3	6
4	6
7	13
4	7
3	6
3	13
8	14
5	6
6	9
6	5
5	12
7	14
5	6
5	8
4	8
4	8
6	18
5	15
4	9
6	11
6	18
7	9
3	8
3	9
3	3
4	14
4	7
3	9
5	7
4	13
7	17
7	9
4	9
5	9
5	11
6	11
6	9
4	5
5	9
4	8
5	12
7	13
6	8
4	10
4	5
8	18
4	6
8	13
7	13
5	7
5	18
5	10
4	9
5	9
3	10
5	7
6	5
10	18
5	7
6	16
9	7
3	5
3	3
5	10
5	17
3	11
5	8
5	6
6	9
3	3
4	3
5	15
5	9
4	6
4	18
5	8
4	7
9	19
6	8
5	11
7	19
4	9
9	9
8	19
4	4
4	9
7	20
4	6
6	14
5	8
7	11
8	13
3	6
4	6
9	15
6	10
5	21
4	10
5	9
4	12
7	8
5	13
4	6
4	9
2	8
4	5
9	27
3	3
4	10
3	7
5	7
3	9
3	3
5	12
5	10
4	10
5	13
6	7
7	12
4	10
3	6
6	14
4	9
5	12
5	8
4	6
3	6
8	9
3	5
4	8
5	6
6	12
4	6
3	4
7	12
2	4
5	7
5	7
7	21
3	8
6	4
4	8
4	8
4	11
4	6
3	3
4	10
6	12
6	14
3	7
6	13
6	14
5	14
4	7
3	6
1	2
4	9
3	7
8	12
4	8
4	6
5	8
3	19
4	4
4	7
4	7
5	5
4	9
8	9
3	6
4	18
8	17
5	12
7	7
7	14
6	17
4	10
7	12
6	18
7	15
3	2
4	7
4	13
3	8
4	9
5	10
4	9
4	11
5	7
7	8
9	10
3	10
5	7
5	5
5	14
4	5
5	7
5	11
4	4
6	12
4	10
6	15
6	12
5	7
8	17
5	14
4	9
5	14
5	5
5	3
5	7
6	11
5	9
8	10
5	9
12	11
5	13
3	2
5	17
6	20
7	23
4	7
6	14
4	8
5	15
6	9
7	15
6	19
4	9
5	16
4	14
5	8
5	11
6	20
4	9
4	13
4	15
9	12
5	8
4	6
4	8
7	15
4	11
3	8
5	9
4	12
4	1
7	8
5	11
5	6
5	12
5	8
5	18
4	9
5	6
7	12
5	10
4	14
9	10
9	12
3	4
3	3
5	15
5	4
5	3
7	9
4	7
8	9
3	3
4	6
4	14
4	5
7	19
3	4
6	12
5	11
4	4
6	11
6	5
5	10
4	6
1	4
6	9
4	9
5	4
4	6
3	6
4	16
3	3
3	2
6	9
5	15
7	12
6	12
2	11
4	3
7	11
6	5
6	10
7	19
7	7
5	8
4	7
6	11
4	10
5	9
5	14
6	11
3	5
5	7
2	3
5	5
4	7
5	11
4	5
4	5
6	13
7	16
6	5
2	2
4	8
4	6
4	14
3	4
4	5
4	10
7	8
2	3
4	6
5	3
5	8
7	15
6	13
3	4
5	3
4	5
2	4
5	10
5	6
5	8
8	11
8	8
5	10
4	13
6	6
5	4
3	5
7	11
4	7
7	19
6	17
4	8
6	14
4	14
3	6
3	8
3	12
5	10
5	6
6	19
4	12
5	13
6	8
5	10
6	18
7	18
7	22
5	11
4	5
3	11
4	6
6	12
5	13
7	27
7	17
4	11
8	23
6	23
4	15
9	15
6	14
3	12
9	17
7	20
6	15
4	10
3	4
8	14
7	14
6	11
4	12
5	10
6	19
7	11
3	12
8	14
7	9
5	12
4	11
5	12
6	12
6	17
5	14
8	19
5	13
4	12
6	9
4	6
4	11
8	18
4	4
3	10
5	7
3	14
4	7
5	9
8	15
3	10
6	18
7	4
5	13
5	11
5	8
6	2
8	18
5	11
3	10
6	10
9	14
8	13
8	12
4	8
5	16
6	6
5	7
5	6
7	12
5	9
4	11
5	8
3	11
7	16
5	7
4	11
5	15
8	13
4	7
10	15
3	9
4	14
7	18
3	4
3	13
8	21
5	13
6	10
3	9
5	12
4	10
5	13
5	4
3	6
5	7
4	7
5	9
8	11
4	6
4	5
5	10
2	4
3	4
2	4
4	5
4	8
4	4
3	3
4	14
3	2
6	5
4	6
5	14
7	16
5	11
4	7
6	19
6	12
5	6
7	10
3	8
8	15
5	7
5	12
4	8
5	12
4	7
7	12
4	6
7	11
6	15
5	5
4	6
3	6
4	6
4	10
5	10
4	13
4	12
3	13
4	7
5	7
3	15
5	10
4	6
3	6
6	8
4	9
5	10
4	17
4	10
5	5
4	5
4	16
5	7
2	2
5	11
4	12
4	4
4	5
4	4
3	4
2	4
7	13
5	7
7	10
5	3
4	9
4	9
3	8
5	8
6	11
4	3
2	3
4	6
5	13
5	8
4	7
3	6
2	3
5	8
4	6
5	10
5	13
5	5
5	7
4	5
4	11
5	14
3	11
5	10
5	9
3	5
4	5
4	4
2	5
6	11
3	7
3	5
2	3
3	8
3	6
3	2
4	9
5	5
5	6
4	5
2	2
4	4
3	11
3	8
1	1
1	1
2	4
1	1
1	1
1	1
3	5
3	8
2	2
2	4
2	2
2	3
2	2
2	3
2	3
2	3
3	4
2	2
2	1
2	2
2	1
2	1
2	3
2	1
2	2
4	5
2	3
2	5
1	1
3	6
2	5
2	3
2	1
3	3
2	2
2	3
2	2
3	5
3	3
2	2
3	4
3	2
4	4
2	4
2	2
3	4
2	4
1	1
2	1
4	3
2	6
2	6
4	4
2	3
4	9
2	10
3	3
3	3
3	6
2	2
2	7
4	4
3	7
2	1
2	3
4	10
4	3
4	5
1	2
4	3
3	2
4	7
3	5
3	5
3	8
4	6
4	10
3	6
3	3
5	6
3	10
4	7
2	3
4	3
5	4
3	8
4	8
2	3
4	6
4	7
3	7
4	12
2	2
2	2
2	2
2	4
2	4
4	4
3	5
5	13
3	2
4	9
4	7
2	3
3	4
3	5
2	3
2	3
2	4
3	3
2	5
2	1
3	6
4	6
4	3
4	9
2	3
3	2
4	6
2	3
4	5
4	14
3	10
2	4
3	3
4	3
3	1
4	8
1	1
3	9
3	10
3	5
3	2
4	4
4	10
4	4
1	3
2	6
3	4
4	9
3	4
4	4
3	6
2	1
3	6
2	3
4	10
2	8
3	4
3	9
3	7
2	2
3	8
3	9
4	10
4	4
4	6
5	14
4	7
4	6
2	4
4	2
4	7
3	10
5	5
3	5
5	7
4	10
4	2
4	8
5	5
4	5
2	2
4	4
6	14
5	5
4	4
5	10
4	7
3	6
2	2
3	5
4	3
3	9
4	4
4	4
3	4
3	3
2	2
3	3
2	2
5	8
3	3
3	10
4	7
3	3
4	4
4	8
2	3
4	11
4	7
4	2
2	2
2	2
4	8
3	7
3	4
3	7
3	4
3	5
2	2
4	7
3	7
4	6
3	5
5	13
4	9
4	2
2	6
3	4
3	1
3	3
2	2
1	1
4	4
4	3
4	6
4	7
4	9
4	2
4	3
3	3
4	4
2	2
3	2
3	2
3	7
4	6
2	4
4	4
3	3
3	1
3	2
3	5
2	3
3	7
4	8
2	1
2	8
2	6
4	8
4	7
4	4
5	7
3	4
5	11
4	10
4	10
4	8
4	6
3	3
3	6
4	7
4	10
3	6
4	14
4	9
5	7
7	15
4	8
3	5
6	5
3	9
7	12
4	11
5	13
4	13
5	7
4	13
5	6
3	7
5	14
5	9
5	12
5	9
4	4
7	18
6	6
5	9
4	11
4	12
5	11
3	8
8	15
4	6
5	10
4	14
5	8
5	16
8	16
4	4
5	4
5	9
2	4
5	6
8	11
5	2
8	16
4	11
4	7
8	21
5	8
5	7
4	9
7	12
4	12
5	8
8	15
4	13
3	3
5	6
5	13
6	18
4	8
7	8
4	11
4	10
5	8
4	5
5	8
7	8
5	17
5	7
4	17
4	10
8	21
3	2
6	5
4	10
7	8
9	16
4	8
5	12
4	12
5	5
4	6
8	14
4	12
3	8
4	6
3	6
3	8
6	11
8	15
6	16
5	8
4	9
4	6
6	10
4	7
7	12
3	5
7	12
3	8
10	15
3	5
5	7
4	5
4	13
5	5
6	14
7	12
4	4
5	6
2	3
6	18
4	5
5	2
5	13
5	13
6	13
6	7
3	7
4	9
4	4
6	7
4	13
4	9
6	5
4	10
6	3
3	8
3	8
4	5
4	6
6	16
4	10
4	11
5	5
4	8
6	4
6	13
4	5
5	5
8	6
5	6
7	11
5	16
4	7
6	5
4	5
4	13
8	16
5	14
3	9
6	8
5	18
3	11
5	8
7	7
2	3
7	15
7	14
4	5
7	11
4	4
6	15
5	7
7	12
8	9
6	7
4	6
7	10
6	20
5	5
8	12
6	5
4	8
5	9
3	2
5	10
5	6
5	9
5	7
4	9
3	7
5	4
7	8
5	14
5	10
4	4
3	6
6	14
4	6
8	17
4	6
5	9
5	13
2	2
8	7
6	8
7	23
9	13
4	8
2	5
8	11
4	4
5	6
4	6
7	13
3	12
3	4
4	7
5	20
7	11
4	6
5	10
6	18
6	7
4	4
4	12
8	11
4	8
2	11
6	5
5	9
7	16
3	9
4	10
6	4
4	9
6	10
3	6
5	5
6	12
4	10
6	13
6	7
3	13
6	13
6	12
7	16
4	6
7	12
4	3
5	11
6	8
5	10
6	8
2	4
5	12
4	12
3	3
6	6
4	8
4	11
8	13
4	7
4	18
4	7
3	3
4	6
5	7
8	13
5	3
6	16
3	7
4	7
6	11
4	3
3	5
4	5
3	5
5	2
4	2
4	5
4	8
4	3
5	1
5	4
4	2
4	2
2	3
3	6
3	4
2	1
5	3
5	5
4	3
3	2
5	4
5	11
5	4
3	4
4	5
2	3
3	5
3	2
3	3
3	3
2	1
2	2
4	7
3	3
3	1
2	2
2	1
5	2
4	8
4	2
2	3
4	2
2	2
3	5
3	3
4	1
3	9
2	4
5	4
5	4
4	2
4	8
4	5
2	7
5	3
2	1
3	5
3	3
3	10
5	4
[truncated: 11,672 more rows]

## Sheet: Figure 5-figure supplement 3
A-Pre and Post Truncation Fraction Bound							B-Duration of Trajectories				C-Example Trajectory 1 (73)						C-Example Trajectory 2 (76)
Binning		Pre-Truncation		Post-Truncation			Trajectory #	Total Frames	Total Time (s)		Frame	Time (s)	Intensity	DISC Fit	Kept Post-Truncation		Frame	Time (s)	Intensity	DISC Fit	Kept Post-Truncation
Start Time (s)	End Time (s)	mu	s.e.m.	mu	s.e.m.		1	4394	439.4		1	0.1	605.238	503.987	1		1	0.1	573.095	576.767	1
1	40	0.905025	0.00875857	0.895329	0.00904714		2	581	58.1		2	0.2	527.905	503.987	1		2	0.2	509.524	576.767	1
41	80	0.85386	0.00988247	0.848287	0.0100999		3	2746	274.6		3	0.3	474	503.987	1		3	0.3	560.714	576.767	1
81	120	0.806689	0.0119103	0.800471	0.0123259		4	3334	333.4		4	0.4	560.524	503.987	1		4	0.4	560.619	576.767	1
121	160	0.77685	0.013341	0.787347	0.013513		5	8000	800		5	0.5	539.048	503.987	1		5	0.5	531.381	576.767	1
161	200	0.726715	0.0152357	0.749794	0.0164031		6	2416	241.6		6	0.6	545.143	503.987	1		6	0.6	505.19	576.767	1
201	240	0.711596	0.0150457	0.751142	0.0165576		7	2357	235.7		7	0.7	520.143	503.987	1		7	0.7	574.857	576.767	1
241	280	0.683995	0.0155305	0.773277	0.0152896		8	2876	287.6		8	0.8	512.333	503.987	1		8	0.8	626.619	576.767	1
281	320	0.620431	0.0178665	0.737756	0.0184281		9	1185	118.5		9	0.9	505.619	503.987	1		9	0.9	534.048	576.767	1
321	360	0.595794	0.0185507	0.736851	0.0206383		10	6067	606.7		10	1	511.381	503.987	1		10	1	532.81	576.767	1
361	400	0.536022	0.0182234	0.69318	0.021426		11	625	62.5		11	1.1	502.81	503.987	1		11	1.1	529.429	576.767	1
401	440	0.495017	0.0190924	0.686688	0.0246009		12	6397	639.7		12	1.2	482.857	503.987	1		12	1.2	533.81	576.767	1
441	480	0.477424	0.0189803	0.716471	0.0250079		13	2979	297.9		13	1.3	537.048	503.987	1		13	1.3	566.238	576.767	1
481	520	0.435701	0.0193901	0.701912	0.029074		14	8000	800		14	1.4	496.667	503.987	1		14	1.4	615.143	576.767	1
521	560	0.427348	0.0190959	0.685458	0.0334862		15	2958	295.8		15	1.5	462.19	503.987	1		15	1.5	532.952	510.138	1
561	600	0.385346	0.0193274	0.682794	0.0339866		16	4996	499.6		16	1.6	497.381	503.987	1		16	1.6	504.619	510.138	1
601	640	0.376419	0.0195449	0.75746	0.0325846		17	8000	800		17	1.7	529.429	503.987	1		17	1.7	529.238	510.138	1
641	680	0.338742	0.018622	0.694781	0.0342328		18	5064	506.4		18	1.8	525.667	503.987	1		18	1.8	497.905	510.138	1
681	720	0.320059	0.0183595	0.732544	0.0333143		19	2717	271.7		19	1.9	520.571	503.987	1		19	1.9	510.095	510.138	1
721	760	0.308007	0.0183038	0.696886	0.0377389		20	6404	640.4		20	2	510.762	503.987	1		20	2	483.381	510.138	1
761	800	0.307492	0.0182058	0.656974	0.0399656		21	2701	270.1		21	2.1	554.19	503.987	1		21	2.1	536.286	510.138	1
							22	1391	139.1		22	2.2	560.381	503.987	1		22	2.2	546.048	576.767	1
							23	3282	328.2		23	2.3	512.476	503.987	1		23	2.3	573.095	576.767	1
							24	8000	800		24	2.4	502.667	503.987	1		24	2.4	584.905	576.767	1
							25	8000	800		25	2.5	468.286	503.987	1		25	2.5	593.19	576.767	1
							26	1024	102.4		26	2.6	535.333	503.987	1		26	2.6	629.238	576.767	1
							27	4042	404.2		27	2.7	510.905	503.987	1		27	2.7	545.286	576.767	1
							28	1107	110.7		28	2.8	481.429	503.987	1		28	2.8	759.571	779.1	1
							29	2961	296.1		29	2.9	517.381	503.987	1		29	2.9	1006.9	779.1	1
							30	1651	165.1		30	3	494.429	503.987	1		30	3	917.238	779.1	1
							31	778	77.8		31	3.1	526.857	503.987	1		31	3.1	869.333	779.1	1
							32	1833	183.3		32	3.2	491.857	503.987	1		32	3.2	587.286	576.767	1
							33	5363	536.3		33	3.3	516.762	503.987	1		33	3.3	636.048	576.767	1
							34	2657	265.7		34	3.4	475.19	503.987	1		34	3.4	613.667	576.767	1
							35	3456	345.6		35	3.5	500.286	503.987	1		35	3.5	573.619	576.767	1
							36	3884	388.4		36	3.6	434.19	415.843	1		36	3.6	711.571	576.767	1
							37	1910	191		37	3.7	425.524	415.843	1		37	3.7	632.095	576.767	1
							38	1052	105.2		38	3.8	406.286	415.843	1		38	3.8	627.333	576.767	1
							39	3576	357.6		39	3.9	399.81	415.843	1		39	3.9	613.333	576.767	1
							40	1715	171.5		40	4	417	415.843	1		40	4	496.333	576.767	1
							41	1731	173.1		41	4.1	420.857	415.843	1		41	4.1	641.667	576.767	1
							42	4611	461.1		42	4.2	440.524	415.843	1		42	4.2	590.905	576.767	1
							43	4657	465.7		43	4.3	431.286	415.843	1		43	4.3	524.857	576.767	1
							44	5307	530.7		44	4.4	421.143	415.843	1		44	4.4	663.429	576.767	1
							45	2725	272.5		45	4.5	405.857	415.843	1		45	4.5	603.81	576.767	1
							46	3463	346.3		46	4.6	456.048	415.843	1		46	4.6	600.333	576.767	1
							47	4856	485.6		47	4.7	457	415.843	1		47	4.7	667.095	576.767	1
							48	4080	408		48	4.8	407.286	415.843	1		48	4.8	599.286	576.767	1
							49	4292	429.2		49	4.9	398.286	415.843	1		49	4.9	617.238	576.767	1
							50	1127	112.7		50	5	411.333	415.843	1		50	5	593.857	576.767	1
							51	4924	492.4		51	5.1	412.762	415.843	1		51	5.1	592.524	576.767	1
							52	2276	227.6		52	5.2	444.571	415.843	1		52	5.2	553.429	576.767	1
							53	1609	160.9		53	5.3	429.286	415.843	1		53	5.3	416.619	510.138	1
							54	8000	800		54	5.4	451.619	415.843	1		54	5.4	512	510.138	1
							55	2340	234		55	5.5	475	415.843	1		55	5.5	553.571	510.138	1
							56	8000	800		56	5.6	428.286	415.843	1		56	5.6	574	510.138	1
							57	5753	575.3		57	5.7	421.714	415.843	1		57	5.7	545.048	510.138	1
							58	3593	359.3		58	5.8	478	503.987	1		58	5.8	519.095	510.138	1
							59	3259	325.9		59	5.9	500.81	503.987	1		59	5.9	543.619	510.138	1
							60	4948	494.8		60	6	497.81	503.987	1		60	6	508.095	510.138	1
							61	8000	800		61	6.1	486.381	503.987	1		61	6.1	559.524	510.138	1
							62	3386	338.6		62	6.2	535.286	503.987	1		62	6.2	538.048	510.138	1
							63	2178	217.8		63	6.3	520.524	503.987	1		63	6.3	556.19	510.138	1
							64	2061	206.1		64	6.4	492.286	503.987	1		64	6.4	541.81	510.138	1
							65	2622	262.2		65	6.5	520.905	503.987	1		65	6.5	533.19	510.138	1
							66	2293	229.3		66	6.6	520.048	503.987	1		66	6.6	555.905	510.138	1
							67	1487	148.7		67	6.7	531.619	503.987	1		67	6.7	514.762	510.138	1
							68	1075	107.5		68	6.8	491	503.987	1		68	6.8	538.667	510.138	1
							69	2521	252.1		69	6.9	489.333	503.987	1		69	6.9	480.857	510.138	1
							70	8000	800		70	7	480.286	503.987	1		70	7	573.19	510.138	1
							71	3153	315.3		71	7.1	502.905	503.987	1		71	7.1	568.476	510.138	1
							72	1236	123.6		72	7.2	486.571	503.987	1		72	7.2	508.619	510.138	1
							73	4231	423.1		73	7.3	419.381	503.987	1		73	7.3	522.619	510.138	1
							74	6662	666.2		74	7.4	458.571	503.987	1		74	7.4	485.143	510.138	1
							75	4752	475.2		75	7.5	510.619	503.987	1		75	7.5	586.714	576.767	1
							76	3684	368.4		76	7.6	504.619	503.987	1		76	7.6	628.476	576.767	1
							77	2874	287.4		77	7.7	477.429	503.987	1		77	7.7	684.381	576.767	1
							78	8000	800		78	7.8	482.048	503.987	1		78	7.8	624.762	576.767	1
							79	4052	405.2		79	7.9	522.19	503.987	1		79	7.9	654.619	576.767	1
							80	1435	143.5		80	8	525.857	503.987	1		80	8	604.238	576.767	1
							81	2000	200		81	8.1	507.667	503.987	1		81	8.1	629.524	576.767	1
							82	1874	187.4		82	8.2	473.81	503.987	1		82	8.2	613.571	576.767	1
							83	2355	235.5		83	8.3	505.381	503.987	1		83	8.3	602	576.767	1
							84	5019	501.9		84	8.4	453.381	503.987	1		84	8.4	574.333	576.767	1
							85	5305	530.5		85	8.5	460.238	503.987	1		85	8.5	519.81	510.138	1
							86	8000	800		86	8.6	478.762	503.987	1		86	8.6	548	510.138	1
							87	3553	355.3		87	8.7	453.476	503.987	1		87	8.7	479.19	510.138	1
							88	2506	250.6		88	8.8	496.905	503.987	1		88	8.8	466.667	510.138	1
							89	8000	800		89	8.9	521.238	503.987	1		89	8.9	445.762	510.138	1
							90	8000	800		90	9	559.857	503.987	1		90	9	467.095	510.138	1
							91	2147	214.7		91	9.1	469.333	503.987	1		91	9.1	531.905	510.138	1
							92	5557	555.7		92	9.2	542.81	503.987	1		92	9.2	454.476	510.138	1
							93	8000	800		93	9.3	537.286	503.987	1		93	9.3	434.571	510.138	1
							94	1849	184.9		94	9.4	515.571	503.987	1		94	9.4	461.619	510.138	1
							95	3125	312.5		95	9.5	500.048	503.987	1		95	9.5	462.571	510.138	1
							96	2712	271.2		96	9.6	443.857	503.987	1		96	9.6	468.714	510.138	1
							97	8000	800		97	9.7	502.905	503.987	1		97	9.7	503.143	510.138	1
							98	4233	423.3		98	9.8	479.238	503.987	1		98	9.8	482.19	510.138	1
							99	5187	518.7		99	9.9	498.238	503.987	1		99	9.9	456.619	510.138	1
							100	4386	438.6		100	10	488	503.987	1		100	10	503.571	510.138	1
							101	5599	559.9		101	10.1	475.571	503.987	1		101	10.1	448.714	510.138	1
							102	4733	473.3		102	10.2	527.905	503.987	1		102	10.2	455.095	510.138	1
							103	3564	356.4		103	10.3	433.667	503.987	1		103	10.3	507.286	510.138	1
							104	8000	800		104	10.4	465.286	503.987	1		104	10.4	570.81	576.767	1
							105	2563	256.3		105	10.5	477.476	503.987	1		105	10.5	656.524	576.767	1
							106	8000	800		106	10.6	467.286	503.987	1		106	10.6	551.905	576.767	1
							107	8000	800		107	10.7	481.19	503.987	1		107	10.7	614.619	576.767	1
							108	3056	305.6		108	10.8	456.667	503.987	1		108	10.8	547.857	576.767	1
							109	8000	800		109	10.9	454.762	503.987	1		109	10.9	499.238	510.138	1
							110	2753	275.3		110	11	488.667	503.987	1		110	11	469.571	510.138	1
							111	8000	800		111	11.1	460.762	503.987	1		111	11.1	504.095	510.138	1
							112	3011	301.1		112	11.2	455.857	503.987	1		112	11.2	523.429	510.138	1
							113	8000	800		113	11.3	527.81	503.987	1		113	11.3	520.333	510.138	1
							114	4710	471		114	11.4	486.905	503.987	1		114	11.4	523.095	510.138	1
							115	1728	172.8		115	11.5	494.095	503.987	1		115	11.5	584.524	576.767	1
							116	1443	144.3		116	11.6	521.476	503.987	1		116	11.6	607.571	576.767	1
							117	1965	196.5		117	11.7	497.667	503.987	1		117	11.7	590.667	576.767	1
							118	1641	164.1		118	11.8	503.143	503.987	1		118	11.8	607.19	576.767	1
							119	2650	265		119	11.9	378.81	415.843	1		119	11.9	643.81	576.767	1
							120	4478	447.8		120	12	511	503.987	1		120	12	623.286	576.767	1
							121	2339	233.9		121	12.1	454.333	503.987	1		121	12.1	676.762	576.767	1
							122	4510	451		122	12.2	472.524	503.987	1		122	12.2	642.81	576.767	1
							123	2012	201.2		123	12.3	456.381	503.987	1		123	12.3	639.19	576.767	1
							124	2276	227.6		124	12.4	458.952	503.987	1		124	12.4	632	576.767	1
							125	2312	231.2		125	12.5	538.714	503.987	1		125	12.5	569.571	576.767	1
							126	3647	364.7		126	12.6	531.619	503.987	1		126	12.6	598.81	576.767	1
							127	3137	313.7		127	12.7	477.667	503.987	1		127	12.7	631.905	576.767	1
							128	8000	800		128	12.8	529.667	503.987	1		128	12.8	555.714	576.767	1
							129	8000	800		129	12.9	525.238	503.987	1		129	12.9	568.238	576.767	1
							130	3106	310.6		130	13	463.905	503.987	1		130	13	562.429	576.767	1
							131	8000	800		131	13.1	515.238	503.987	1		131	13.1	578.952	576.767	1
							132	3968	396.8		132	13.2	498.048	503.987	1		132	13.2	498.476	576.767	1
							133	3383	338.3		133	13.3	501.619	503.987	1		133	13.3	563.19	576.767	1
							134	3719	371.9		134	13.4	515.286	503.987	1		134	13.4	562.905	576.767	1
							135	6002	600.2		135	13.5	485.238	503.987	1		135	13.5	520.619	576.767	1
							136	6466	646.6		136	13.6	465.429	503.987	1		136	13.6	532.857	576.767	1
							137	3165	316.5		137	13.7	433.333	503.987	1		137	13.7	494.476	576.767	1
							138	8000	800		138	13.8	467.952	503.987	1		138	13.8	532.143	576.767	1
							139	8000	800		139	13.9	461.143	503.987	1		139	13.9	590.524	576.767	1
							140	3530	353		140	14	503.238	503.987	1		140	14	521.333	576.767	1
							141	5151	515.1		141	14.1	496	503.987	1		141	14.1	527.762	576.767	1
							142	3557	355.7		142	14.2	495.524	503.987	1		142	14.2	559	576.767	1
							143	8000	800		143	14.3	511.19	503.987	1		143	14.3	502.905	576.767	1
							144	3933	393.3		144	14.4	523.143	503.987	1		144	14.4	564.667	576.767	1
							145	8000	800		145	14.5	530.952	503.987	1		145	14.5	522.619	576.767	1
							146	5179	517.9		146	14.6	455.571	503.987	1		146	14.6	581.286	576.767	1
							147	8000	800		147	14.7	498.286	503.987	1		147	14.7	555.762	576.767	1
							148	2254	225.4		148	14.8	490.095	503.987	1		148	14.8	509.857	576.767	1
							149	4699	469.9		149	14.9	517.238	503.987	1		149	14.9	560.905	576.767	1
							150	8000	800		150	15	481.381	503.987	1		150	15	618.714	576.767	1
							151	8000	800		151	15.1	482.381	503.987	1		151	15.1	575.857	576.767	1
							152	1507	150.7		152	15.2	470.048	503.987	1		152	15.2	553.286	576.767	1
							153	4055	405.5		153	15.3	491.619	503.987	1		153	15.3	517.714	576.767	1
							154	8000	800		154	15.4	426.19	503.987	1		154	15.4	523.095	576.767	1
							155	8000	800		155	15.5	471.286	503.987	1		155	15.5	569.524	576.767	1
							156	8000	800		156	15.6	465.667	503.987	1		156	15.6	514.333	576.767	1
							157	4627	462.7		157	15.7	428.714	503.987	1		157	15.7	519.381	576.767	1
							158	4012	401.2		158	15.8	492.571	503.987	1		158	15.8	494.667	576.767	1
							159	3896	389.6		159	15.9	528.762	503.987	1		159	15.9	551.048	576.767	1
							160	3930	393		160	16	467.286	503.987	1		160	16	590.238	576.767	1
							161	1514	151.4		161	16.1	542.81	503.987	1		161	16.1	536.667	576.767	1
							162	1457	145.7		162	16.2	447.81	503.987	1		162	16.2	524.571	576.767	1
							163	3435	343.5		163	16.3	469.19	503.987	1		163	16.3	560.81	576.767	1
							164	8000	800		164	16.4	492.857	503.987	1		164	16.4	550.714	576.767	1
							165	1118	111.8		165	16.5	467.429	503.987	1		165	16.5	555.286	576.767	1
							166	5559	555.9		166	16.6	480.619	503.987	1		166	16.6	503.524	576.767	1
							167	2392	239.2		167	16.7	516.905	503.987	1		167	16.7	609.381	576.767	1
							168	6637	663.7		168	16.8	469.857	503.987	1		168	16.8	563.667	576.767	1
							169	8000	800		169	16.9	495.952	503.987	1		169	16.9	576.667	576.767	1
							170	8000	800		170	17	456.952	503.987	1		170	17	586.905	576.767	1
							171	4042	404.2		171	17.1	500.238	503.987	1		171	17.1	562.714	576.767	1
							172	1638	163.8		172	17.2	536.714	503.987	1		172	17.2	563.667	576.767	1
							173	4755	475.5		173	17.3	506.524	503.987	1		173	17.3	544.571	576.767	1
							174	1745	174.5		174	17.4	534.143	503.987	1		174	17.4	560.81	576.767	1
							175	3693	369.3		175	17.5	495.333	503.987	1		175	17.5	539.667	576.767	1
							176	1993	199.3		176	17.6	539.571	503.987	1		176	17.6	545.238	576.767	1
							177	8000	800		177	17.7	496.333	503.987	1		177	17.7	539.905	576.767	1
							178	1166	116.6		178	17.8	529.476	503.987	1		178	17.8	571.333	576.767	1
							179	3203	320.3		179	17.9	500.476	503.987	1		179	17.9	601.143	576.767	1
							180	8000	800		180	18	521.905	503.987	1		180	18	543.714	576.767	1
							181	3200	320		181	18.1	538.571	503.987	1		181	18.1	608.905	576.767	1
							182	8000	800		182	18.2	507.857	503.987	1		182	18.2	526.048	576.767	1
							183	8000	800		183	18.3	541.714	503.987	1		183	18.3	537.952	576.767	1
							184	5182	518.2		184	18.4	552.476	503.987	1		184	18.4	549.857	576.767	1
							185	2285	228.5		185	18.5	506.667	503.987	1		185	18.5	558.714	576.767	1
							186	4823	482.3		186	18.6	507.333	503.987	1		186	18.6	549.238	576.767	1
							187	1101	110.1		187	18.7	594.476	604.11	1		187	18.7	530.333	510.138	1
							188	8000	800		188	18.8	571.381	604.11	1		188	18.8	504.714	510.138	1
							189	8000	800		189	18.9	565.238	604.11	1		189	18.9	416.238	445.188	1
							190	3737	373.7		190	19	584	604.11	1		190	19	418.714	445.188	1
							191	4207	420.7		191	19.1	576.857	604.11	1		191	19.1	390.905	445.188	1
							192	8000	800		192	19.2	549.143	503.987	1		192	19.2	491.095	445.188	1
							193	6075	607.5		193	19.3	503.571	503.987	1		193	19.3	428.048	445.188	1
							194	1444	144.4		194	19.4	493.571	503.987	1		194	19.4	447.857	445.188	1
							195	8000	800		195	19.5	519.048	503.987	1		195	19.5	449.476	445.188	1
							196	8000	800		196	19.6	480.238	503.987	1		196	19.6	464.238	445.188	1
							197	733	73.3		197	19.7	529.667	503.987	1		197	19.7	443.857	445.188	1
							198	2026	202.6		198	19.8	484.524	503.987	1		198	19.8	453.905	445.188	1
							199	1694	169.4		199	19.9	498.238	503.987	1		199	19.9	521	510.138	1
							200	3254	325.4		200	20	450.524	503.987	1		200	20	502.333	510.138	1
							201	1841	184.1		201	20.1	510.476	503.987	1		201	20.1	482.095	510.138	1
							202	8000	800		202	20.2	469.905	503.987	1		202	20.2	525.571	510.138	1
							203	4161	416.1		203	20.3	520.619	503.987	1		203	20.3	532	510.138	1
							204	1416	141.6		204	20.4	518.857	503.987	1		204	20.4	552.667	576.767	1
							205	4284	428.4		205	20.5	552.286	503.987	1		205	20.5	574.762	576.767	1
							206	4766	476.6		206	20.6	520.857	503.987	1		206	20.6	563.333	576.767	1
							207	3254	325.4		207	20.7	525.714	503.987	1		207	20.7	530	576.767	1
							208	1780	178		208	20.8	543	503.987	1		208	20.8	503.762	576.767	1
							209	966	96.6		209	20.9	530.19	503.987	1		209	20.9	557.952	576.767	1
							210	2431	243.1		210	21	501.81	503.987	1		210	21	529.714	576.767	1
							211	5553	555.3		211	21.1	577.095	503.987	1		211	21.1	534.19	576.767	1
							212	6273	627.3		212	21.2	499.143	503.987	1		212	21.2	540.143	576.767	1
							213	8000	800		213	21.3	529.238	503.987	1		213	21.3	552.048	576.767	1
							214	5652	565.2		214	21.4	537.429	503.987	1		214	21.4	556.524	576.767	1
							215	2169	216.9		215	21.5	505.857	503.987	1		215	21.5	582.143	576.767	1
							216	8000	800		216	21.6	547.048	503.987	1		216	21.6	518.476	576.767	1
							217	5150	515		217	21.7	525.905	503.987	1		217	21.7	576.619	576.767	1
							218	5397	539.7		218	21.8	514.476	503.987	1		218	21.8	547.857	576.767	1
							219	8000	800		219	21.9	491.048	503.987	1		219	21.9	541.762	576.767	1
							220	5203	520.3		220	22	534.762	503.987	1		220	22	556.857	576.767	1
							221	4223	422.3		221	22.1	493.095	503.987	1		221	22.1	575.381	576.767	1
							222	4744	474.4		222	22.2	526.333	503.987	1		222	22.2	568.524	576.767	1
							223	8000	800		223	22.3	549.048	503.987	1		223	22.3	571.381	576.767	1
							224	4238	423.8		224	22.4	490.524	503.987	1		224	22.4	556.952	576.767	1
							225	4534	453.4		225	22.5	444.381	503.987	1		225	22.5	535.19	576.767	1
							226	8000	800		226	22.6	507.81	503.987	1		226	22.6	550.714	576.767	1
							227	5297	529.7		227	22.7	491.857	503.987	1		227	22.7	558.238	576.767	1
							228	4550	455		228	22.8	480.714	503.987	1		228	22.8	563.762	576.767	1
							229	544	54.4		229	22.9	525.19	503.987	1		229	22.9	547.286	576.767	1
							230	629	62.9		230	23	471.048	503.987	1		230	23	538.857	576.767	1
							231	2704	270.4		231	23.1	490.286	503.987	1		231	23.1	403.762	445.188	1
							232	1855	185.5		232	23.2	454.429	503.987	1		232	23.2	461.429	445.188	1
							233	5521	552.1		233	23.3	524.476	503.987	1		233	23.3	467.095	445.188	1
							234	1632	163.2		234	23.4	518.571	503.987	1		234	23.4	466	445.188	1
							235	4975	497.5		235	23.5	461.429	503.987	1		235	23.5	472.952	445.188	1
							236	4725	472.5		236	23.6	487.952	503.987	1		236	23.6	479.952	445.188	1
							237	5324	532.4		237	23.7	582.238	503.987	1		237	23.7	441.952	445.188	1
							238	8000	800		238	23.8	528.571	503.987	1		238	23.8	439.714	445.188	1
							239	3683	368.3		239	23.9	475.381	503.987	1		239	23.9	457.81	445.188	1
							240	8000	800		240	24	481.333	503.987	1		240	24	436.19	445.188	1
							241	1173	117.3		241	24.1	491.048	503.987	1		241	24.1	485.143	445.188	1
							242	3607	360.7		242	24.2	545.905	503.987	1		242	24.2	475.429	445.188	1
							243	3053	305.3		243	24.3	515.381	503.987	1		243	24.3	412.571	445.188	1
							244	3624	362.4		244	24.4	564.524	503.987	1		244	24.4	443.524	445.188	1
							245	5313	531.3		245	24.5	468.857	503.987	1		245	24.5	430.762	445.188	1
							246	3939	393.9		246	24.6	529	503.987	1		246	24.6	409.524	445.188	1
							247	2268	226.8		247	24.7	448.381	503.987	1		247	24.7	460.19	445.188	1
							248	3095	309.5		248	24.8	518.571	503.987	1		248	24.8	455.905	445.188	1
							249	2304	230.4		249	24.9	524.333	503.987	1		249	24.9	434.286	445.188	1
							250	4942	494.2		250	25	533.333	503.987	1		250	25	440.476	445.188	1
							251	8000	800		251	25.1	502.476	503.987	1		251	25.1	420.095	445.188	1
							252	3167	316.7		252	25.2	477.952	503.987	1		252	25.2	423.714	445.188	1
							253	3375	337.5		253	25.3	556.429	503.987	1		253	25.3	421.619	445.188	1
							254	6458	645.8		254	25.4	464.381	503.987	1		254	25.4	410.571	445.188	1
							255	2240	224		255	25.5	478.143	503.987	1		255	25.5	415.238	445.188	1
							256	4915	491.5		256	25.6	481.476	503.987	1		256	25.6	461.19	445.188	1
							257	2607	260.7		257	25.7	489.286	503.987	1		257	25.7	452.619	445.188	1
							258	2743	274.3		258	25.8	454.667	503.987	1		258	25.8	463.095	445.188	1
							259	2182	218.2		259	25.9	488.143	503.987	1		259	25.9	494.143	445.188	1
							260	1514	151.4		260	26	488	503.987	1		260	26	447.238	445.188	1
							261	2647	264.7		261	26.1	431.19	503.987	1		261	26.1	436.048	445.188	1
							262	3579	357.9		262	26.2	449.619	503.987	1		262	26.2	462.048	445.188	1
							263	2344	234.4		263	26.3	483.714	503.987	1		263	26.3	502.905	510.138	1
							264	5044	504.4		264	26.4	478.238	503.987	1		264	26.4	522.667	510.138	1
							265	4662	466.2		265	26.5	503.762	503.987	1		265	26.5	520.429	510.138	1
							266	903	90.3		266	26.6	504.524	503.987	1		266	26.6	535.524	510.138	1
							267	1293	129.3		267	26.7	512.714	503.987	1		267	26.7	529.381	510.138	1
							268	3522	352.2		268	26.8	474.952	503.987	1		268	26.8	549.429	510.138	1
							269	5256	525.6		269	26.9	470.667	503.987	1		269	26.9	519.857	510.138	1
							270	5187	518.7		270	27	399.333	415.843	1		270	27	517.762	510.138	1
							271	2713	271.3		271	27.1	427	415.843	1		271	27.1	477.571	510.138	1
							272	4413	441.3		272	27.2	369.667	415.843	1		272	27.2	510.095	510.138	1
							273	2586	258.6		273	27.3	390.429	415.843	1		273	27.3	475.095	510.138	1
							274	1588	158.8		274	27.4	386.238	415.843	1		274	27.4	444.429	445.188	1
							275	4695	469.5		275	27.5	385.952	415.843	1		275	27.5	438.619	445.188	1
							276	2766	276.6		276	27.6	408.286	415.843	1		276	27.6	406.905	445.188	1
							277	2969	296.9		277	27.7	412.476	415.843	1		277	27.7	469.048	445.188	1
							278	8000	800		278	27.8	386.286	415.843	1		278	27.8	450.19	445.188	1
							279	6615	661.5		279	27.9	365.333	415.843	1		279	27.9	431	445.188	1
							280	3196	319.6		280	28	412	415.843	1		280	28	428.714	445.188	1
							281	2578	257.8		281	28.1	405.048	415.843	1		281	28.1	446.81	445.188	1
							282	2794	279.4		282	28.2	398.952	415.843	1		282	28.2	415.762	445.188	1
							283	3872	387.2		283	28.3	419.762	415.843	1		283	28.3	473	445.188	1
							284	2798	279.8		284	28.4	413.952	415.843	1		284	28.4	415.143	445.188	1
							285	2387	238.7		285	28.5	385.524	415.843	1		285	28.5	442.524	445.188	1
							286	2772	277.2		286	28.6	383.238	415.843	1		286	28.6	477.905	445.188	1
							287	3880	388		287	28.7	405.143	415.843	1		287	28.7	430.81	445.188	1
							288	5658	565.8		288	28.8	418.238	415.843	1		288	28.8	412.667	445.188	1
							289	8000	800		289	28.9	397.905	415.843	1		289	28.9	437.429	445.188	1
							290	3862	386.2		290	29	379.19	415.843	1		290	29	426.524	445.188	1
							291	3393	339.3		291	29.1	428.524	415.843	1		291	29.1	441	445.188	1
							292	2661	266.1		292	29.2	413.905	415.843	1		292	29.2	406.714	445.188	1
							293	1124	112.4		293	29.3	397.81	415.843	1		293	29.3	421.714	445.188	1
							294	3967	396.7		294	29.4	420.619	415.843	1		294	29.4	432.476	445.188	1
							295	660	66		295	29.5	398.667	415.843	1		295	29.5	425.667	445.188	1
							296	1546	154.6		296	29.6	436.524	415.843	1		296	29.6	400.476	445.188	1
											297	29.7	422.19	415.843	1		297	29.7	438.857	445.188	1
											298	29.8	474.952	415.843	1		298	29.8	414.81	445.188	1
											299	29.9	413.571	415.843	1		299	29.9	439.952	445.188	1
											300	30	440.095	415.843	1		300	30	464.619	445.188	1
											301	30.1	443.714	415.843	1		301	30.1	444	445.188	1
											302	30.2	466.143	503.987	1		302	30.2	401.095	445.188	1
											303	30.3	461.714	503.987	1		303	30.3	412	445.188	1
											304	30.4	469.381	503.987	1		304	30.4	405.857	445.188	1
											305	30.5	472.333	503.987	1		305	30.5	423.619	445.188	1
											306	30.6	483.333	503.987	1		306	30.6	443.143	445.188	1
											307	30.7	503.905	503.987	1		307	30.7	434.619	445.188	1
											308	30.8	418.762	415.843	1		308	30.8	441.762	445.188	1
											309	30.9	398.524	415.843	1		309	30.9	422.905	445.188	1
											310	31	409.952	415.843	1		310	31	433.429	445.188	1
											311	31.1	413.619	415.843	1		311	31.1	456.381	445.188	1
											312	31.2	372.857	415.843	1		312	31.2	441.81	445.188	1
											313	31.3	430.952	415.843	1		313	31.3	501	510.138	1
											314	31.4	418.667	415.843	1		314	31.4	514.524	510.138	1
											315	31.5	400	415.843	1		315	31.5	540.762	510.138	1
											316	31.6	389.762	415.843	1		316	31.6	471.857	445.188	1
											317	31.7	406.143	415.843	1		317	31.7	433.048	445.188	1
											318	31.8	419.095	415.843	1		318	31.8	412.524	445.188	1
											319	31.9	400.714	415.843	1		319	31.9	435.333	445.188	1
											320	32	391.333	415.843	1		320	32	457.333	445.188	1
											321	32.1	404.667	415.843	1		321	32.1	449.381	445.188	1
											322	32.2	392.619	415.843	1		322	32.2	451.571	445.188	1
											323	32.3	402.333	415.843	1		323	32.3	435.381	445.188	1
											324	32.4	405.857	415.843	1		324	32.4	460.714	445.188	1
											325	32.5	383.667	415.843	1		325	32.5	456.238	445.188	1
											326	32.6	394.81	415.843	1		326	32.6	415.048	445.188	1
											327	32.7	406.238	415.843	1		327	32.7	445.476	445.188	1
											328	32.8	347.476	415.843	1		328	32.8	433.619	445.188	1
											329	32.9	353.952	415.843	1		329	32.9	440.952	445.188	1
											330	33	405.286	415.843	1		330	33	422.571	445.188	1
											331	33.1	399	415.843	1		331	33.1	403.714	445.188	1
											332	33.2	383	415.843	1		332	33.2	450.238	445.188	1
											333	33.3	400.905	415.843	1		333	33.3	397.714	445.188	1
											334	33.4	372.143	415.843	1		334	33.4	435	445.188	1
											335	33.5	397.714	415.843	1		335	33.5	435.952	445.188	1
											336	33.6	423.524	415.843	1		336	33.6	440.619	445.188	1
											337	33.7	415.952	415.843	1		337	33.7	452.095	445.188	1
											338	33.8	408.762	415.843	1		338	33.8	441.667	445.188	1
											339	33.9	432.905	415.843	1		339	33.9	440.905	445.188	1
											340	34	385.429	415.843	1		340	34	411.571	445.188	1
											341	34.1	428.762	415.843	1		341	34.1	452.095	445.188	1
											342	34.2	400.762	415.843	1		342	34.2	447.095	445.188	1
											343	34.3	400.143	415.843	1		343	34.3	429.476	445.188	1
											344	34.4	425.143	415.843	1		344	34.4	483.381	445.188	1
											345	34.5	435.524	415.843	1		345	34.5	457	445.188	1
											346	34.6	409.762	415.843	1		346	34.6	447.667	445.188	1
											347	34.7	385.762	415.843	1		347	34.7	469.095	445.188	1
											348	34.8	385.429	415.843	1		348	34.8	457.095	445.188	1
											349	34.9	400.476	415.843	1		349	34.9	450.238	445.188	1
											350	35	418.476	415.843	1		350	35	413.81	445.188	1
											351	35.1	373.095	415.843	1		351	35.1	417.905	445.188	1
											352	35.2	385.286	415.843	1		352	35.2	449.381	445.188	1
											353	35.3	376.524	415.843	1		353	35.3	454.429	445.188	1
											354	35.4	402.143	415.843	1		354	35.4	441.19	445.188	1
											355	35.5	435.619	415.843	1		355	35.5	444.952	445.188	1
											356	35.6	411.524	415.843	1		356	35.6	474.952	510.138	1
											357	35.7	404.667	415.843	1		357	35.7	481.571	510.138	1
											358	35.8	387.619	415.843	1		358	35.8	531.619	510.138	1
											359	35.9	423.857	415.843	1		359	35.9	524	510.138	1
											360	36	394.619	415.843	1		360	36	511.714	510.138	1
											361	36.1	397.143	415.843	1		361	36.1	503.714	510.138	1
											362	36.2	365.524	415.843	1		362	36.2	502.381	510.138	1
											363	36.3	366.476	415.843	1		363	36.3	515.048	510.138	1
											364	36.4	402.571	415.843	1		364	36.4	515.762	510.138	1
											365	36.5	376.19	415.843	1		365	36.5	545.905	510.138	1
											366	36.6	426.571	415.843	1		366	36.6	536.143	510.138	1
											367	36.7	394.762	415.843	1		367	36.7	516.095	510.138	1
											368	36.8	424.19	415.843	1		368	36.8	545.905	510.138	1
											369	36.9	411	415.843	1		369	36.9	570.857	510.138	1
											370	37	371.095	415.843	1		370	37	554.429	510.138	1
											371	37.1	380.381	415.843	1		371	37.1	572.143	510.138	1
											372	37.2	399.952	415.843	1		372	37.2	566.524	510.138	1
											373	37.3	361.667	415.843	1		373	37.3	491.619	510.138	1
											374	37.4	434.619	415.843	1		374	37.4	432	445.188	1
											375	37.5	380.714	415.843	1		375	37.5	466.143	445.188	1
											376	37.6	400.81	415.843	1		376	37.6	467.857	445.188	1
											377	37.7	398.238	415.843	1		377	37.7	458.095	445.188	1
											378	37.8	457.952	415.843	1		378	37.8	456.238	445.188	1
											379	37.9	411.571	415.843	1		379	37.9	485.762	445.188	1
											380	38	390.19	415.843	1		380	38	479.762	445.188	1
											381	38.1	377.143	415.843	1		381	38.1	434.429	445.188	1
											382	38.2	406.857	415.843	1		382	38.2	476.238	445.188	1
											383	38.3	419.429	415.843	1		383	38.3	461.476	445.188	1
											384	38.4	399.714	415.843	1		384	38.4	450.667	445.188	1
											385	38.5	358.19	415.843	1		385	38.5	480.524	445.188	1
											386	38.6	402.381	415.843	1		386	38.6	444.905	445.188	1
											387	38.7	375.905	415.843	1		387	38.7	465.667	445.188	1
											388	38.8	380.143	415.843	1		388	38.8	372.286	372.422	1
											389	38.9	467.571	415.843	1		389	38.9	370.333	372.422	1
											390	39	391.333	415.843	1		390	39	375.524	372.422	1
											391	39.1	392.667	415.843	1		391	39.1	363.762	372.422	1
											392	39.2	374.429	415.843	1		392	39.2	377.476	372.422	1
											393	39.3	365.905	415.843	1		393	39.3	347.952	372.422	1
											394	39.4	334	333.461	1		394	39.4	371.714	372.422	1
											395	39.5	341.905	333.461	1		395	39.5	369.762	372.422	1
											396	39.6	346.714	333.461	1		396	39.6	363.81	372.422	1
											397	39.7	368.381	333.461	1		397	39.7	357.81	372.422	1
											398	39.8	327.619	333.461	1		398	39.8	388.381	372.422	1
											399	39.9	342.667	333.461	1		399	39.9	359.857	372.422	1
											400	40	369.667	333.461	1		400	40	374.857	372.422	1
											401	40.1	351	333.461	1		401	40.1	370.429	372.422	1
											402	40.2	330.048	333.461	1		402	40.2	340.619	372.422	1
											403	40.3	329.143	333.461	1		403	40.3	357.524	372.422	1
											404	40.4	349	333.461	1		404	40.4	370.762	372.422	1
											405	40.5	359.048	333.461	1		405	40.5	360.429	372.422	1
											406	40.6	365.286	333.461	1		406	40.6	361.286	372.422	1
											407	40.7	354.524	333.461	1		407	40.7	381.905	372.422	1
											408	40.8	334.524	333.461	1		408	40.8	368.095	372.422	1
											409	40.9	343.571	333.461	1		409	40.9	365.143	372.422	1
											410	41	361.524	333.461	1		410	41	354.095	372.422	1
											411	41.1	335.905	333.461	1		411	41.1	352.381	372.422	1
											412	41.2	364.048	333.461	1		412	41.2	378.429	372.422	1
											413	41.3	351.333	333.461	1		413	41.3	346.762	372.422	1
											414	41.4	342.857	333.461	1		414	41.4	367.619	372.422	1
											415	41.5	320	333.461	1		415	41.5	352.048	372.422	1
											416	41.6	340.905	333.461	1		416	41.6	365.524	372.422	1
											417	41.7	339.762	333.461	1		417	41.7	379.857	372.422	1
											418	41.8	370.476	333.461	1		418	41.8	353.429	372.422	1
											419	41.9	361.762	333.461	1		419	41.9	352.143	372.422	1
											420	42	332.571	333.461	1		420	42	354.19	372.422	1
											421	42.1	380.571	333.461	1		421	42.1	353.857	372.422	1
											422	42.2	367.381	333.461	1		422	42.2	344.286	372.422	1
											423	42.3	334.619	333.461	1		423	42.3	382.19	372.422	1
											424	42.4	338.095	333.461	1		424	42.4	424.429	445.188	1
											425	42.5	344.429	333.461	1		425	42.5	448.571	445.188	1
											426	42.6	375.619	333.461	1		426	42.6	551.667	510.138	1
											427	42.7	344	333.461	1		427	42.7	498.19	510.138	1
											428	42.8	348.143	333.461	1		428	42.8	509.143	510.138	1
											429	42.9	347.048	333.461	1		429	42.9	513.143	510.138	1
											430	43	340.952	333.461	1		430	43	441.381	445.188	1
											431	43.1	337.476	333.461	1		431	43.1	388.048	445.188	1
											432	43.2	353.333	333.461	1		432	43.2	423.048	445.188	1
											433	43.3	349.524	333.461	1		433	43.3	439.095	445.188	1
											434	43.4	338	333.461	1		434	43.4	445.429	445.188	1
											435	43.5	364.333	333.461	1		435	43.5	445.333	445.188	1
											436	43.6	366.333	333.461	1		436	43.6	459.952	445.188	1
											437	43.7	387.905	333.461	1		437	43.7	429.238	445.188	1
											438	43.8	334.19	333.461	1		438	43.8	383.619	445.188	1
											439	43.9	324.19	333.461	1		439	43.9	389.286	445.188	1
											440	44	342.476	333.461	1		440	44	453.905	445.188	1
											441	44.1	323.857	333.461	1		441	44.1	411.429	445.188	1
											442	44.2	361.524	333.461	1		442	44.2	420.095	445.188	1
											443	44.3	397.429	415.843	1		443	44.3	386.381	445.188	1
											444	44.4	346.619	415.843	1		444	44.4	478.429	445.188	1
											445	44.5	463.19	503.987	1		445	44.5	426.619	445.188	1
											446	44.6	506.667	503.987	1		446	44.6	416.762	445.188	1
											447	44.7	569.762	503.987	1		447	44.7	449.333	445.188	1
											448	44.8	491.952	503.987	1		448	44.8	492.143	510.138	1
											449	44.9	495.143	503.987	1		449	44.9	562	510.138	1
											450	45	538.238	503.987	1		450	45	494.095	510.138	1
											451	45.1	528.857	503.987	1		451	45.1	449.095	445.188	1
											452	45.2	503.952	503.987	1		452	45.2	423.143	445.188	1
											453	45.3	554.905	503.987	1		453	45.3	485.048	445.188	1
											454	45.4	576.619	503.987	1		454	45.4	491.667	445.188	1
											455	45.5	540.857	503.987	1		455	45.5	435.19	445.188	1
											456	45.6	564.619	503.987	1		456	45.6	451.524	445.188	1
											457	45.7	615.381	503.987	1		457	45.7	486.857	445.188	1
											458	45.8	553	503.987	1		458	45.8	461	445.188	1
											459	45.9	547.286	503.987	1		459	45.9	462.81	445.188	1
											460	46	570.429	503.987	1		460	46	435.667	445.188	1
											461	46.1	552.714	503.987	1		461	46.1	425.429	445.188	1
											462	46.2	516.333	503.987	1		462	46.2	459.476	445.188	1
											463	46.3	528.286	503.987	1		463	46.3	425.905	445.188	1
											464	46.4	540	503.987	1		464	46.4	452.905	445.188	1
											465	46.5	533.476	503.987	1		465	46.5	414.048	445.188	1
											466	46.6	542.905	503.987	1		466	46.6	410	445.188	1
											467	46.7	521.429	503.987	1		467	46.7	407.238	445.188	1
											468	46.8	465.143	503.987	1		468	46.8	465.429	445.188	1
											469	46.9	572.381	604.11	1		469	46.9	422.857	445.188	1
											470	47	672	604.11	1		470	47	435.048	445.188	1
											471	47.1	616.048	604.11	1		471	47.1	438.762	445.188	1
											472	47.2	636.286	604.11	1		472	47.2	409.667	445.188	1
											473	47.3	643.571	604.11	1		473	47.3	440.238	445.188	1
											474	47.4	611.429	604.11	1		474	47.4	445.429	445.188	1
											475	47.5	642.19	604.11	1		475	47.5	449.333	445.188	1
											476	47.6	617.524	604.11	1		476	47.6	421.905	445.188	1
											477	47.7	630.762	604.11	1		477	47.7	419.238	445.188	1
											478	47.8	566.952	604.11	1		478	47.8	452.19	445.188	1
											479	47.9	590.476	604.11	1		479	47.9	436.571	445.188	1
											480	48	571	604.11	1		480	48	407.381	445.188	1
											481	48.1	521.048	503.987	1		481	48.1	457	445.188	1
											482	48.2	548.619	503.987	1		482	48.2	470.143	445.188	1
											483	48.3	528.619	503.987	1		483	48.3	406.905	445.188	1
											484	48.4	564.095	503.987	1		484	48.4	438.571	445.188	1
											485	48.5	511.81	503.987	1		485	48.5	442.333	445.188	1
											486	48.6	503.952	503.987	1		486	48.6	423.476	445.188	1
											487	48.7	539.667	503.987	1		487	48.7	455.81	445.188	1
											488	48.8	515.762	503.987	1		488	48.8	459.952	445.188	1
											489	48.9	538.095	503.987	1		489	48.9	397.667	445.188	1
											490	49	536.524	503.987	1		490	49	429.048	445.188	1
											491	49.1	586.905	503.987	1		491	49.1	451.476	445.188	1
											492	49.2	599.238	503.987	1		492	49.2	483.476	510.138	1
											493	49.3	543.524	503.987	1		493	49.3	504.905	510.138	1
											494	49.4	502.048	503.987	1		494	49.4	476	510.138	1
											495	49.5	507.048	503.987	1		495	49.5	494.762	510.138	1
											496	49.6	560.762	503.987	1		496	49.6	503.238	510.138	1
											497	49.7	544.571	503.987	1		497	49.7	456.857	445.188	1
											498	49.8	542	503.987	1		498	49.8	435.238	445.188	1
											499	49.9	605.571	503.987	1		499	49.9	458.619	445.188	1
											500	50	528.095	503.987	1		500	50	443.571	445.188	1
											501	50.1	542.19	503.987	1		501	50.1	431	445.188	1
											502	50.2	529.381	503.987	1		502	50.2	429.381	445.188	1
											503	50.3	520.19	503.987	1		503	50.3	442	445.188	1
											504	50.4	530.667	503.987	1		504	50.4	504.429	445.188	1
											505	50.5	485.667	503.987	1		505	50.5	485.762	445.188	1
											506	50.6	442.571	415.843	1		506	50.6	348.429	372.422	1
											507	50.7	421.048	415.843	1		507	50.7	362.714	372.422	1
											508	50.8	470.667	415.843	1		508	50.8	411.857	372.422	1
											509	50.9	433.571	415.843	1		509	50.9	387.714	372.422	1
											510	51	505.429	415.843	1		510	51	355.286	372.422	1
											511	51.1	389.476	415.843	1		511	51.1	333.571	372.422	1
											512	51.2	339.429	333.461	1		512	51.2	355.667	372.422	1
											513	51.3	346.238	333.461	1		513	51.3	366.048	372.422	1
											514	51.4	355.619	333.461	1		514	51.4	351.667	372.422	1
											515	51.5	331.095	333.461	1		515	51.5	333.524	372.422	1
											516	51.6	328.381	333.461	1		516	51.6	369.714	372.422	1
											517	51.7	341.81	333.461	1		517	51.7	436.571	445.188	1
											518	51.8	337.762	333.461	1		518	51.8	451.286	445.188	1
											519	51.9	334	333.461	1		519	51.9	449	445.188	1
											520	52	365.476	333.461	1		520	52	475.381	445.188	1
											521	52.1	326.143	333.461	1		521	52.1	443.476	445.188	1
											522	52.2	348	333.461	1		522	52.2	436.286	445.188	1
											523	52.3	307.19	333.461	1		523	52.3	424.238	445.188	1
											524	52.4	353.381	333.461	1		524	52.4	447.143	445.188	1
											525	52.5	331.857	333.461	1		525	52.5	415.381	445.188	1
											526	52.6	345.095	333.461	1		526	52.6	438.476	445.188	1
											527	52.7	327.524	333.461	1		527	52.7	405.333	445.188	1
											528	52.8	336.095	333.461	1		528	52.8	439.81	445.188	1
											529	52.9	303.905	333.461	1		529	52.9	404.238	445.188	1
											530	53	328.524	333.461	1		530	53	468.619	445.188	1
											531	53.1	305.048	333.461	1		531	53.1	434.476	445.188	1
											532	53.2	327.762	333.461	1		532	53.2	485.286	445.188	1
											533	53.3	335.429	333.461	1		533	53.3	419.095	445.188	1
											534	53.4	324.667	333.461	1		534	53.4	467.476	445.188	1
											535	53.5	318.476	333.461	1		535	53.5	402.333	445.188	1
											536	53.6	336.714	333.461	1		536	53.6	432.19	445.188	1
											537	53.7	299.857	333.461	1		537	53.7	445.381	445.188	1
											538	53.8	349	333.461	1		538	53.8	438.095	445.188	1
											539	53.9	451.476	415.843	1		539	53.9	409.048	445.188	1
											540	54	545.381	503.987	1		540	54	398.667	445.188	1
											541	54.1	412.524	415.843	1		541	54.1	428.952	445.188	1
											542	54.2	393.857	415.843	1		542	54.2	425.048	445.188	1
											543	54.3	413.19	415.843	1		543	54.3	444.667	445.188	1
											544	54.4	450.238	415.843	1		544	54.4	423.476	445.188	1
											545	54.5	410	415.843	1		545	54.5	441.143	445.188	1
											546	54.6	379.905	415.843	1		546	54.6	457.667	445.188	1
											547	54.7	420.381	415.843	1		547	54.7	490.714	445.188	1
											548	54.8	411.905	415.843	1		548	54.8	429.905	445.188	1
											549	54.9	475.857	503.987	1		549	54.9	473.333	445.188	1
											550	55	503.381	503.987	1		550	55	443.571	445.188	1
											551	55.1	546.524	503.987	1		551	55.1	401.476	445.188	1
											552	55.2	540.571	503.987	1		552	55.2	410.381	445.188	1
											553	55.3	569.333	503.987	1		553	55.3	471.19	445.188	1
											554	55.4	533.381	503.987	1		554	55.4	464.048	445.188	1
											555	55.5	507.952	503.987	1		555	55.5	458.333	445.188	1
											556	55.6	484.857	503.987	1		556	55.6	441.905	445.188	1
											557	55.7	482.381	503.987	1		557	55.7	438.238	445.188	1
											558	55.8	431.19	415.843	1		558	55.8	499.619	445.188	1
											559	55.9	427.905	415.843	1		559	55.9	460.143	445.188	1
											560	56	420.286	415.843	1		560	56	443.381	445.188	1
											561	56.1	439.143	415.843	1		561	56.1	478.619	445.188	1
											562	56.2	443.333	415.843	1		562	56.2	469.571	445.188	1
											563	56.3	425.667	415.843	1		563	56.3	454.381	445.188	1
											564	56.4	464.762	415.843	1		564	56.4	441.667	445.188	1
											565	56.5	444.81	415.843	1		565	56.5	454.714	445.188	1
											566	56.6	420.905	415.843	1		566	56.6	472.286	445.188	1
											567	56.7	405.905	415.843	1		567	56.7	478	445.188	1
											568	56.8	475.381	503.987	1		568	56.8	461.19	445.188	1
											569	56.9	477.667	503.987	1		569	56.9	466	445.188	1
											570	57	511.333	503.987	1		570	57	424.238	445.188	1
											571	57.1	486.714	503.987	1		571	57.1	452.333	445.188	1
											572	57.2	499.619	503.987	1		572	57.2	496.429	445.188	1
											573	57.3	516.048	503.987	1		573	57.3	470.571	445.188	1
											574	57.4	530.714	503.987	1		574	57.4	498.524	445.188	1
											575	57.5	554.143	503.987	1		575	57.5	485.524	445.188	1
											576	57.6	403.81	415.843	1		576	57.6	438.429	445.188	1
											577	57.7	353.619	415.843	1		577	57.7	444.952	445.188	1
											578	57.8	454.333	415.843	1		578	57.8	425.429	445.188	1
											579	57.9	396.381	415.843	1		579	57.9	438.286	445.188	1
											580	58	395.333	415.843	1		580	58	401.095	445.188	1
											581	58.1	397.095	415.843	1		581	58.1	449.952	445.188	1
											582	58.2	419.952	415.843	1		582	58.2	473.238	445.188	1
											583	58.3	444.81	415.843	1		583	58.3	413.571	445.188	1
											584	58.4	449.333	415.843	1		584	58.4	410.857	445.188	1
											585	58.5	573.81	503.987	1		585	58.5	445.714	445.188	1
											586	58.6	577.476	503.987	1		586	58.6	418.333	445.188	1
											587	58.7	518.571	503.987	1		587	58.7	443.286	445.188	1
											588	58.8	537.048	503.987	1		588	58.8	430.619	445.188	1
											589	58.9	483.476	503.987	1		589	58.9	441.238	445.188	1
											590	59	533.667	503.987	1		590	59	399.952	445.188	1
											591	59.1	554.143	503.987	1		591	59.1	463.238	445.188	1
											592	59.2	536.048	503.987	1		592	59.2	424.381	445.188	1
											593	59.3	535.81	503.987	1		593	59.3	445.048	445.188	1
											594	59.4	546.238	503.987	1		594	59.4	473.476	445.188	1
											595	59.5	507.905	503.987	1		595	59.5	424.238	445.188	1
											596	59.6	527.19	503.987	1		596	59.6	473.524	445.188	1
											597	59.7	522.667	503.987	1		597	59.7	448.81	445.188	1
											598	59.8	487.952	503.987	1		598	59.8	403.905	445.188	1
											599	59.9	554.19	503.987	1		599	59.9	449.524	445.188	1
											600	60	503.143	503.987	1		600	60	437.476	445.188	1
											601	60.1	451.714	415.843	1		601	60.1	457	445.188	1
											602	60.2	397	415.843	1		602	60.2	450.619	445.188	1
											603	60.3	457.619	415.843	1		603	60.3	380.238	445.188	1
											604	60.4	440.143	415.843	1		604	60.4	473.429	445.188	1
											605	60.5	443.333	415.843	1		605	60.5	414.19	445.188	1
											606	60.6	415.048	415.843	1		606	60.6	464.048	445.188	1
											607	60.7	441.571	415.843	1		607	60.7	451.429	445.188	1
											608	60.8	429.667	415.843	1		608	60.8	448.619	445.188	1
											609	60.9	413.524	415.843	1		609	60.9	471.286	445.188	1
											610	61	476.714	415.843	1		610	61	419.286	445.188	1
											611	61.1	441.524	415.843	1		611	61.1	443.476	445.188	1
											612	61.2	407.429	415.843	1		612	61.2	435.238	445.188	1
											613	61.3	395.619	415.843	1		613	61.3	452.714	445.188	1
											614	61.4	460.476	415.843	1		614	61.4	428.762	445.188	1
											615	61.5	422.619	415.843	1		615	61.5	432.571	445.188	1
											616	61.6	447.048	415.843	1		616	61.6	434.048	445.188	1
											617	61.7	429.905	415.843	1		617	61.7	434.333	445.188	1
											618	61.8	425.333	415.843	1		618	61.8	437.667	445.188	1
											619	61.9	400.905	415.843	1		619	61.9	463.286	445.188	1
											620	62	436.19	415.843	1		620	62	444.619	445.188	1
											621	62.1	416.048	415.843	1		621	62.1	464	445.188	1
											622	62.2	416.952	415.843	1		622	62.2	449.476	445.188	1
											623	62.3	407.333	415.843	1		623	62.3	572.095	510.138	1
											624	62.4	424.714	415.843	1		624	62.4	514.905	510.138	1
											625	62.5	451.476	415.843	1		625	62.5	497.81	510.138	1
											626	62.6	420.667	415.843	1		626	62.6	532.905	510.138	1
											627	62.7	472.381	415.843	1		627	62.7	447.095	445.188	1
											628	62.8	459.857	415.843	1		628	62.8	445.429	445.188	1
											629	62.9	419.524	415.843	1		629	62.9	469.429	445.188	1
											630	63	457.571	415.843	1		630	63	402.619	445.188	1
											631	63.1	461.476	415.843	1		631	63.1	446.238	445.188	1
											632	63.2	437.714	415.843	1		632	63.2	438.857	445.188	1
											633	63.3	439.19	415.843	1		633	63.3	432.19	445.188	1
											634	63.4	464.476	415.843	1		634	63.4	445.429	445.188	1
											635	63.5	432.667	415.843	1		635	63.5	445.048	445.188	1
											636	63.6	508.952	503.987	1		636	63.6	435.905	445.188	1
											637	63.7	535.524	503.987	1		637	63.7	462.381	445.188	1
											638	63.8	512.143	503.987	1		638	63.8	458.905	445.188	1
											639	63.9	520.714	503.987	1		639	63.9	433.714	445.188	1
											640	64	499.238	503.987	1		640	64	445.429	445.188	1
											641	64.1	478.333	503.987	1		641	64.1	444.333	445.188	1
											642	64.2	489.714	503.987	1		642	64.2	430.619	445.188	1
											643	64.3	487.857	503.987	1		643	64.3	452.667	445.188	1
											644	64.4	527.429	503.987	1		644	64.4	452.667	445.188	1
											645	64.5	478.238	503.987	1		645	64.5	454	445.188	1
											646	64.6	506.381	503.987	1		646	64.6	421.762	445.188	1
											647	64.7	500.762	503.987	1		647	64.7	495.857	445.188	1
											648	64.8	556.429	503.987	1		648	64.8	396.286	445.188	1
											649	64.9	546.048	503.987	1		649	64.9	416.19	445.188	1
											650	65	547.81	503.987	1		650	65	457.714	445.188	1
											651	65.1	538.333	503.987	1		651	65.1	431.238	445.188	1
											652	65.2	507.524	503.987	1		652	65.2	400.619	445.188	1
											653	65.3	518.81	503.987	1		653	65.3	448.667	445.188	1
											654	65.4	502.429	503.987	1		654	65.4	418.619	445.188	1
											655	65.5	538.143	503.987	1		655	65.5	449.952	445.188	1
											656	65.6	543.905	503.987	1		656	65.6	455.143	445.188	1
											657	65.7	552.952	503.987	1		657	65.7	435.667	445.188	1
											658	65.8	474.667	503.987	1		658	65.8	416.905	445.188	1
											659	65.9	525.143	503.987	1		659	65.9	449.714	445.188	1
											660	66	511.762	503.987	1		660	66	444.476	445.188	1
											661	66.1	597	604.11	1		661	66.1	425.524	445.188	1
											662	66.2	606.286	604.11	1		662	66.2	448.571	445.188	1
											663	66.3	596.333	604.11	1		663	66.3	431	445.188	1
											664	66.4	643.095	604.11	1		664	66.4	438.143	445.188	1
											665	66.5	543.524	604.11	1		665	66.5	461.952	445.188	1
											666	66.6	582.381	604.11	1		666	66.6	412.571	445.188	1
											667	66.7	608.381	604.11	1		667	66.7	460.333	445.188	1
											668	66.8	520.238	604.11	1		668	66.8	456.143	445.188	1
											669	66.9	570.571	604.11	1		669	66.9	470.19	445.188	1
											670	67	568.714	604.11	1		670	67	478.667	445.188	1
											671	67.1	606.857	604.11	1		671	67.1	467.286	445.188	1
											672	67.2	613.429	604.11	1		672	67.2	392.048	445.188	1
											673	67.3	571.905	604.11	1		673	67.3	495.143	445.188	1
											674	67.4	531.714	604.11	1		674	67.4	411.286	445.188	1
											675	67.5	560.81	604.11	1		675	67.5	454.952	445.188	1
											676	67.6	602.238	604.11	1		676	67.6	443.429	445.188	1
											677	67.7	551.476	604.11	1		677	67.7	444.571	445.188	1
											678	67.8	537.048	604.11	1		678	67.8	425.714	445.188	1
											679	67.9	533.429	604.11	1		679	67.9	464.619	445.188	1
											680	68	586.095	604.11	1		680	68	413.619	445.188	1
											681	68.1	601.333	604.11	1		681	68.1	453.429	445.188	1
											682	68.2	568.857	604.11	1		682	68.2	423.095	445.188	1
											683	68.3	555.238	604.11	1		683	68.3	479.238	510.138	1
											684	68.4	605.762	604.11	1		684	68.4	491.857	510.138	1
											685	68.5	548.238	604.11	1		685	68.5	519.857	510.138	1
											686	68.6	578.19	604.11	1		686	68.6	549	510.138	1
											687	68.7	533.286	604.11	1		687	68.7	571.619	510.138	1
											688	68.8	568	604.11	1		688	68.8	512.714	510.138	1
											689	68.9	548.476	604.11	1		689	68.9	482.762	510.138	1
											690	69	586.762	604.11	1		690	69	473.048	510.138	1
											691	69.1	582.333	604.11	1		691	69.1	537.714	510.138	1
											692	69.2	723.048	604.11	1		692	69.2	505.905	510.138	1
											693	69.3	730.048	604.11	1		693	69.3	529.762	510.138	1
											694	69.4	747.857	604.11	1		694	69.4	499.429	510.138	1
											695	69.5	753.381	604.11	1		695	69.5	512.143	510.138	1
											696	69.6	628.381	604.11	1		696	69.6	491.429	510.138	1
											697	69.7	587.571	604.11	1		697	69.7	504.19	510.138	1
											698	69.8	587.19	604.11	1		698	69.8	493.048	510.138	1
											699	69.9	587.048	604.11	1		699	69.9	548.286	510.138	1
											700	70	677.048	604.11	1		700	70	520.714	510.138	1
											701	70.1	664.524	604.11	1		701	70.1	507.048	510.138	1
											702	70.2	632.333	604.11	1		702	70.2	439.571	445.188	1
											703	70.3	601.333	604.11	1		703	70.3	429.762	445.188	1
											704	70.4	594.333	604.11	1		704	70.4	436.81	445.188	1
											705	70.5	612.381	604.11	1		705	70.5	444.571	445.188	1
											706	70.6	671.762	604.11	1		706	70.6	449.095	445.188	1
											707	70.7	715	604.11	1		707	70.7	430.095	445.188	1
											708	70.8	670.095	604.11	1		708	70.8	444.905	445.188	1
											709	70.9	563.095	604.11	1		709	70.9	480.857	445.188	1
											710	71	677.381	604.11	1		710	71	532.905	576.767	1
											711	71.1	675.905	604.11	1		711	71.1	571.048	576.767	1
											712	71.2	602.714	604.11	1		712	71.2	545.81	576.767	1
											713	71.3	543.048	604.11	1		713	71.3	544.381	576.767	1
											714	71.4	550.714	604.11	1		714	71.4	540.381	576.767	1
											715	71.5	629.714	604.11	1		715	71.5	578.381	576.767	1
											716	71.6	611.524	604.11	1		716	71.6	525.143	576.767	1
											717	71.7	629.857	604.11	1		717	71.7	530.571	576.767	1
											718	71.8	609.952	604.11	1		718	71.8	521.429	576.767	1
											719	71.9	619.095	604.11	1		719	71.9	578.333	576.767	1
											720	72	574.048	604.11	1		720	72	531.381	576.767	1
											721	72.1	481.476	503.987	1		721	72.1	515.286	576.767	1
											722	72.2	551.19	503.987	1		722	72.2	547.143	576.767	1
											723	72.3	544.619	503.987	1		723	72.3	568.286	576.767	1
											724	72.4	487.143	503.987	1		724	72.4	591.095	576.767	1
											725	72.5	526.143	503.987	1		725	72.5	598.857	576.767	1
											726	72.6	485.381	503.987	1		726	72.6	559.476	576.767	1
											727	72.7	516.286	503.987	1		727	72.7	548.476	576.767	1
											728	72.8	552.81	503.987	1		728	72.8	523.905	576.767	1
											729	72.9	548.143	503.987	1		729	72.9	419.381	445.188	1
											730	73	518.333	503.987	1		730	73	369.619	445.188	1
											731	73.1	517.286	503.987	1		731	73.1	406.667	445.188	1
											732	73.2	494.476	503.987	1		732	73.2	397.333	445.188	1
											733	73.3	503	503.987	1		733	73.3	447.952	445.188	1
											734	73.4	388.857	415.843	1		734	73.4	482.333	445.188	1
											735	73.5	428.714	415.843	1		735	73.5	468.952	445.188	1
											736	73.6	353.81	333.461	1		736	73.6	473.714	445.188	1
											737	73.7	369.143	333.461	1		737	73.7	475.714	445.188	1
											738	73.8	313.81	333.461	1		738	73.8	471.571	445.188	1
											739	73.9	334	333.461	1		739	73.9	434.952	445.188	1
											740	74	382.143	333.461	1		740	74	436.714	445.188	1
											741	74.1	348.762	333.461	1		741	74.1	368.143	445.188	1
											742	74.2	358.095	333.461	1		742	74.2	439.524	445.188	1
											743	74.3	304.286	333.461	1		743	74.3	402.857	445.188	1
											744	74.4	341.667	333.461	1		744	74.4	425.762	445.188	1
											745	74.5	323.81	333.461	1		745	74.5	425.905	445.188	1
											746	74.6	331.476	333.461	1		746	74.6	386.714	372.422	1
											747	74.7	343.667	333.461	1		747	74.7	424.905	372.422	1
											748	74.8	338.667	333.461	1		748	74.8	383.571	372.422	1
											749	74.9	340.429	333.461	1		749	74.9	370.143	372.422	1
											750	75	348.714	333.461	1		750	75	414.524	372.422	1
											751	75.1	313.905	333.461	1		751	75.1	436.571	372.422	1
											752	75.2	368.905	333.461	1		752	75.2	409.381	372.422	1
											753	75.3	328.905	333.461	1		753	75.3	398.524	372.422	1
											754	75.4	447.952	415.843	1		754	75.4	402.476	372.422	1
											755	75.5	435.81	415.843	1		755	75.5	393.476	372.422	1
											756	75.6	447.333	415.843	1		756	75.6	373.143	372.422	1
											757	75.7	412.286	415.843	1		757	75.7	408.762	372.422	1
											758	75.8	419.571	415.843	1		758	75.8	375.095	372.422	1
											759	75.9	392.238	415.843	1		759	75.9	381.81	372.422	1
											760	76	336.19	333.461	1		760	76	416.19	372.422	1
											761	76.1	357.476	333.461	1		761	76.1	421.667	372.422	1
											762	76.2	342.619	333.461	1		762	76.2	383.048	372.422	1
											763	76.3	319.905	333.461	1		763	76.3	400.762	372.422	1
											764	76.4	335.476	333.461	1		764	76.4	387.667	372.422	1
											765	76.5	369.333	415.843	1		765	76.5	352.19	372.422	1
											766	76.6	434.857	415.843	1		766	76.6	346.476	372.422	1
											767	76.7	421.524	415.843	1		767	76.7	354.476	372.422	1
											768	76.8	437.857	415.843	1		768	76.8	369	372.422	1
											769	76.9	431.048	415.843	1		769	76.9	338.048	372.422	1
											770	77	440.476	415.843	1		770	77	347.286	372.422	1
											771	77.1	463.286	503.987	1		771	77.1	402	372.422	1
											772	77.2	528.571	503.987	1		772	77.2	410.381	445.188	1
											773	77.3	506.524	503.987	1		773	77.3	412.667	445.188	1
											774	77.4	550.333	503.987	1		774	77.4	430.619	445.188	1
											775	77.5	512.476	503.987	1		775	77.5	385.333	445.188	1
											776	77.6	494.286	503.987	1		776	77.6	406.048	445.188	1
											777	77.7	451.714	415.843	1		777	77.7	475	445.188	1
											778	77.8	428.19	415.843	1		778	77.8	449.524	445.188	1
											779	77.9	420.286	415.843	1		779	77.9	459.143	445.188	1
											780	78	463.333	415.843	1		780	78	602.381	576.767	1
											781	78.1	454.238	415.843	1		781	78.1	536.333	576.767	1
											782	78.2	414.905	415.843	1		782	78.2	553.286	576.767	1
											783	78.3	443.19	415.843	1		783	78.3	546.048	576.767	1
											784	78.4	472.571	503.987	1		784	78.4	555.381	576.767	1
											785	78.5	535.952	503.987	1		785	78.5	515.381	576.767	1
											786	78.6	482.905	503.987	1		786	78.6	510.619	576.767	1
											787	78.7	483.714	503.987	1		787	78.7	563.762	576.767	1
											788	78.8	553.429	503.987	1		788	78.8	535.048	576.767	1
											789	78.9	505.048	503.987	1		789	78.9	521	576.767	1
											790	79	456.81	503.987	1		790	79	579.429	576.767	1
											791	79.1	473.905	503.987	1		791	79.1	534.762	576.767	1
											792	79.2	475.952	503.987	1		792	79.2	571.524	576.767	1
											793	79.3	474.905	503.987	1		793	79.3	503.667	576.767	1
											794	79.4	483.524	503.987	1		794	79.4	559.762	576.767	1
											795	79.5	581.286	604.11	1		795	79.5	523	576.767	1
											796	79.6	608.667	604.11	1		796	79.6	596.048	576.767	1
											797	79.7	573.857	604.11	1		797	79.7	518.571	576.767	1
											798	79.8	554.81	604.11	1		798	79.8	598.095	576.767	1
											799	79.9	496.905	604.11	1		799	79.9	576.143	576.767	1
											800	80	553.857	604.11	1		800	80	550.238	576.767	1
											801	80.1	569.095	604.11	1		801	80.1	553.81	576.767	1
											802	80.2	542.952	604.11	1		802	80.2	547.095	576.767	1
											803	80.3	540.619	604.11	1		803	80.3	550.714	576.767	1
											804	80.4	590.286	604.11	1		804	80.4	567.429	576.767	1
											805	80.5	580.19	604.11	1		805	80.5	537.048	576.767	1
											806	80.6	522.286	503.987	1		806	80.6	577.476	576.767	1
											807	80.7	534.381	503.987	1		807	80.7	521.667	576.767	1
											808	80.8	547.476	503.987	1		808	80.8	561.81	576.767	1
											809	80.9	545.048	503.987	1		809	80.9	577.238	576.767	1
											810	81	537.81	503.987	1		810	81	532.429	576.767	1
											811	81.1	541	503.987	1		811	81.1	545.571	576.767	1
											812	81.2	555.857	503.987	1		812	81.2	561.19	576.767	1
											813	81.3	540.333	503.987	1		813	81.3	598.048	576.767	1
											814	81.4	484.381	503.987	1		814	81.4	507.571	576.767	1
											815	81.5	572.667	503.987	1		815	81.5	538.476	576.767	1
											816	81.6	525.762	503.987	1		816	81.6	536.524	576.767	1
											817	81.7	573.048	604.11	1		817	81.7	567.381	576.767	1
											818	81.8	536.476	604.11	1		818	81.8	588.476	576.767	1
											819	81.9	563.714	604.11	1		819	81.9	552.667	576.767	1
											820	82	606.286	604.11	1		820	82	639.429	576.767	1
											821	82.1	614.667	604.11	1		821	82.1	555	576.767	1
											822	82.2	496.905	604.11	1		822	82.2	566.857	576.767	1
											823	82.3	545.571	604.11	1		823	82.3	533.286	576.767	1
											824	82.4	647.571	604.11	1		824	82.4	532.381	576.767	1
											825	82.5	597.286	604.11	1		825	82.5	547.333	576.767	1
											826	82.6	672.524	604.11	1		826	82.6	507.667	576.767	1
											827	82.7	625.762	604.11	1		827	82.7	572.381	576.767	1
											828	82.8	655.524	604.11	1		828	82.8	564.905	576.767	1
											829	82.9	614.762	604.11	1		829	82.9	527.571	576.767	1
											830	83	595.095	604.11	1		830	83	568.857	576.767	1
											831	83.1	599.571	604.11	1		831	83.1	479.667	510.138	1
											832	83.2	619.952	604.11	1		832	83.2	490.524	510.138	1
											833	83.3	605.381	604.11	1		833	83.3	480.905	510.138	1
											834	83.4	685.524	604.11	1		834	83.4	470.667	510.138	1
											835	83.5	683.524	604.11	1		835	83.5	489.095	510.138	1
											836	83.6	618.905	604.11	1		836	83.6	478.619	510.138	1
											837	83.7	641.667	604.11	1		837	83.7	447.143	510.138	1
											838	83.8	634.619	604.11	1		838	83.8	493.952	510.138	1
											839	83.9	621.429	604.11	1		839	83.9	526.81	510.138	1
											840	84	629.81	604.11	1		840	84	493.952	510.138	1
											841	84.1	631.095	604.11	1		841	84.1	470	445.188	1
											842	84.2	622.381	604.11	1		842	84.2	452.333	445.188	1
											843	84.3	604.476	604.11	1		843	84.3	492.095	445.188	1
											844	84.4	611	604.11	1		844	84.4	412.333	445.188	1
											845	84.5	636.524	604.11	1		845	84.5	439.905	445.188	1
											846	84.6	683.381	604.11	1		846	84.6	516.476	445.188	1
											847	84.7	670.286	604.11	1		847	84.7	469.905	445.188	1
											848	84.8	595.667	604.11	1		848	84.8	485.571	445.188	1
											849	84.9	663.238	604.11	1		849	84.9	458.19	445.188	1
											850	85	650.81	604.11	1		850	85	445.952	445.188	1
											851	85.1	630.19	604.11	1		851	85.1	484.714	445.188	1
											852	85.2	576.333	604.11	1		852	85.2	473.714	445.188	1
											853	85.3	575.429	604.11	1		853	85.3	438.524	445.188	1
											854	85.4	633.286	604.11	1		854	85.4	470.429	445.188	1
											855	85.5	669.333	604.11	1		855	85.5	424.19	445.188	1
											856	85.6	622.571	604.11	1		856	85.6	477.476	445.188	1
											857	85.7	610.095	604.11	1		857	85.7	487.286	445.188	1
											858	85.8	510.429	604.11	1		858	85.8	422.667	445.188	1
											859	85.9	568.381	604.11	1		859	85.9	434.429	445.188	1
											860	86	556.952	604.11	1		860	86	448.286	445.188	1
											861	86.1	622.048	604.11	1		861	86.1	460.762	445.188	1
											862	86.2	574.476	604.11	1		862	86.2	477.381	445.188	1
											863	86.3	648.714	604.11	1		863	86.3	417.143	445.188	1
											864	86.4	665.905	604.11	1		864	86.4	467.19	445.188	1
											865	86.5	581.857	604.11	1		865	86.5	490.762	445.188	1
											866	86.6	632.143	604.11	1		866	86.6	486.19	445.188	1
											867	86.7	603.048	604.11	1		867	86.7	509.429	445.188	1
											868	86.8	555.619	604.11	1		868	86.8	447.381	445.188	1
											869	86.9	537.571	604.11	1		869	86.9	429.095	445.188	1
											870	87	664.619	604.11	1		870	87	449.524	445.188	1
											871	87.1	622.857	604.11	1		871	87.1	477.952	445.188	1
											872	87.2	655.857	604.11	1		872	87.2	487.143	445.188	1
											873	87.3	652.762	604.11	1		873	87.3	454.619	445.188	1
											874	87.4	612.571	604.11	1		874	87.4	464.381	445.188	1
											875	87.5	637.905	604.11	1		875	87.5	415.571	445.188	1
											876	87.6	646.714	604.11	1		876	87.6	443.571	445.188	1
											877	87.7	635.286	604.11	1		877	87.7	468.19	445.188	1
											878	87.8	624.952	604.11	1		878	87.8	462.048	445.188	1
											879	87.9	546.619	503.987	1		879	87.9	463.048	445.188	1
											880	88	549.619	503.987	1		880	88	459.143	445.188	1
											881	88.1	462.476	503.987	1		881	88.1	455.476	445.188	1
											882	88.2	576.286	503.987	1		882	88.2	496.667	445.188	1
											883	88.3	506.381	503.987	1		883	88.3	427.762	445.188	1
											884	88.4	394.667	415.843	1		884	88.4	448.619	445.188	1
											885	88.5	400.952	415.843	1		885	88.5	420.952	445.188	1
											886	88.6	412.238	415.843	1		886	88.6	432	445.188	1
											887	88.7	431.238	415.843	1		887	88.7	452.143	445.188	1
											888	88.8	429.286	415.843	1		888	88.8	444	445.188	1
											889	88.9	377	415.843	1		889	88.9	488.905	510.138	1
											890	89	456.524	415.843	1		890	89	501.714	510.138	1
											891	89.1	447.619	415.843	1		891	89.1	505.238	510.138	1
											892	89.2	427.476	415.843	1		892	89.2	480.81	510.138	1
											893	89.3	415.952	415.843	1		893	89.3	466.429	510.138	1
											894	89.4	448.857	415.843	1		894	89.4	448.238	510.138	1
											895	89.5	466.524	503.987	1		895	89.5	559.571	510.138	1
											896	89.6	499.571	503.987	1		896	89.6	463.381	510.138	1
											897	89.7	484.667	503.987	1		897	89.7	485.048	510.138	1
											898	89.8	508	503.987	1		898	89.8	469.333	510.138	1
											899	89.9	500.095	503.987	1		899	89.9	476.429	510.138	1
											900	90	453.714	415.843	1		900	90	441.714	510.138	1
											901	90.1	422.81	415.843	1		901	90.1	455.095	510.138	1
											902	90.2	421.619	415.843	1		902	90.2	496.667	510.138	1
											903	90.3	488.619	415.843	1		903	90.3	503	510.138	1
											904	90.4	458.429	415.843	1		904	90.4	466.429	510.138	1
											905	90.5	446.143	415.843	1		905	90.5	487.952	510.138	1
											906	90.6	402.619	415.843	1		906	90.6	497.667	510.138	1
											907	90.7	436.762	415.843	1		907	90.7	441.286	445.188	1
											908	90.8	326.524	333.461	1		908	90.8	424.19	445.188	1
											909	90.9	339.429	333.461	1		909	90.9	498.952	445.188	1
											910	91	331.571	333.461	1		910	91	445	445.188	1
											911	91.1	322.667	333.461	1		911	91.1	442.476	445.188	1
											912	91.2	358.952	333.461	1		912	91.2	455.429	445.188	1
											913	91.3	331.429	333.461	1		913	91.3	473.81	445.188	1
											914	91.4	333.619	333.461	1		914	91.4	439.524	445.188	1
											915	91.5	310.048	333.461	1		915	91.5	500.81	510.138	1
											916	91.6	347.714	333.461	1		916	91.6	510.952	510.138	1
											917	91.7	347.333	333.461	1		917	91.7	447.143	510.138	1
											918	91.8	335.952	333.461	1		918	91.8	451.095	510.138	1
											919	91.9	339.19	333.461	1		919	91.9	507.095	510.138	1
											920	92	311.333	333.461	1		920	92	528.714	510.138	1
											921	92.1	357.381	333.461	1		921	92.1	467.905	510.138	1
											922	92.2	333.619	333.461	1		922	92.2	482.905	510.138	1
											923	92.3	305.381	333.461	1		923	92.3	514.571	510.138	1
											924	92.4	300.286	333.461	1		924	92.4	519.095	510.138	1
											925	92.5	299.714	333.461	1		925	92.5	420.143	445.188	1
											926	92.6	340.667	333.461	1		926	92.6	456.762	445.188	1
											927	92.7	334.19	333.461	1		927	92.7	476.429	445.188	1
											928	92.8	381.81	415.843	1		928	92.8	447.571	445.188	1
											929	92.9	413.286	415.843	1		929	92.9	439.095	445.188	1
											930	93	459.762	415.843	1		930	93	454.095	445.188	1
											931	93.1	461.952	415.843	1		931	93.1	496.857	445.188	1
											932	93.2	423.143	415.843	1		932	93.2	446.19	445.188	1
											933	93.3	457.714	415.843	1		933	93.3	469.619	445.188	1
											934	93.4	464	415.843	1		934	93.4	460.905	445.188	1
											935	93.5	436.286	415.843	1		935	93.5	467	445.188	1
											936	93.6	425.667	415.843	1		936	93.6	486.619	445.188	1
											937	93.7	399.619	415.843	1		937	93.7	457.333	445.188	1
											938	93.8	429.714	415.843	1		938	93.8	455.667	445.188	1
											939	93.9	429.714	415.843	1		939	93.9	495	445.188	1
											940	94	402.857	415.843	1		940	94	442.238	445.188	1
											941	94.1	465.524	415.843	1		941	94.1	458.476	445.188	1
											942	94.2	442.857	415.843	1		942	94.2	470.333	445.188	1
											943	94.3	445.333	415.843	1		943	94.3	460.81	445.188	1
											944	94.4	416.952	415.843	1		944	94.4	511.476	445.188	1
											945	94.5	434.524	415.843	1		945	94.5	477.381	445.188	1
											946	94.6	415.095	415.843	1		946	94.6	477.286	445.188	1
											947	94.7	456.762	415.843	1		947	94.7	455.429	445.188	1
											948	94.8	449.476	415.843	1		948	94.8	495.81	445.188	1
											949	94.9	415.524	415.843	1		949	94.9	448.095	445.188	1
											950	95	479.762	503.987	1		950	95	443.81	445.188	1
											951	95.1	525.619	503.987	1		951	95.1	418.048	445.188	1
											952	95.2	530.571	503.987	1		952	95.2	443.762	445.188	1
											953	95.3	556.143	503.987	1		953	95.3	469.905	445.188	1
											954	95.4	562.905	503.987	1		954	95.4	467.286	445.188	1
											955	95.5	585.095	503.987	1		955	95.5	472.524	445.188	1
											956	95.6	521.952	503.987	1		956	95.6	440.143	445.188	1
											957	95.7	533.81	503.987	1		957	95.7	449.714	445.188	1
											958	95.8	530.381	503.987	1		958	95.8	443.048	445.188	1
											959	95.9	475.524	503.987	1		959	95.9	486.762	445.188	1
											960	96	512.571	503.987	1		960	96	484.857	445.188	1
											961	96.1	495.571	503.987	1		961	96.1	492	445.188	1
											962	96.2	499.048	503.987	1		962	96.2	444.571	445.188	1
											963	96.3	494.571	503.987	1		963	96.3	441.048	445.188	1
											964	96.4	516.857	503.987	1		964	96.4	556.857	510.138	1
											965	96.5	492.714	503.987	1		965	96.5	482.381	510.138	1
											966	96.6	505.857	503.987	1		966	96.6	446.333	510.138	1
											967	96.7	498.571	503.987	1		967	96.7	508	510.138	1
											968	96.8	519.524	503.987	1		968	96.8	428.952	445.188	1
											969	96.9	479.667	503.987	1		969	96.9	470.19	445.188	1
											970	97	483.952	503.987	1		970	97	473.048	445.188	1
											971	97.1	465.857	503.987	1		971	97.1	427.476	445.188	1
											972	97.2	508.857	503.987	1		972	97.2	458.857	445.188	1
											973	97.3	502.524	503.987	1		973	97.3	478.429	445.188	1
											974	97.4	469.238	503.987	1		974	97.4	444.429	445.188	1
											975	97.5	444.333	503.987	1		975	97.5	449.381	445.188	1
											976	97.6	484.429	503.987	1		976	97.6	442.381	445.188	1
											977	97.7	512.286	503.987	1		977	97.7	451.952	445.188	1
											978	97.8	478.714	503.987	1		978	97.8	444.762	445.188	1
											979	97.9	504.714	503.987	1		979	97.9	458.952	445.188	1
											980	98	518.952	503.987	1		980	98	460.048	445.188	1
											981	98.1	525.714	503.987	1		981	98.1	462	445.188	1
											982	98.2	526.048	503.987	1		982	98.2	482.714	445.188	1
											983	98.3	519.571	503.987	1		983	98.3	453.524	445.188	1
											984	98.4	488.333	503.987	1		984	98.4	448	445.188	1
											985	98.5	463.857	503.987	1		985	98.5	434.095	445.188	1
											986	98.6	512.571	503.987	1		986	98.6	382.667	445.188	1
											987	98.7	515.952	503.987	1		987	98.7	468.286	445.188	1
											988	98.8	559.286	503.987	1		988	98.8	512.333	510.138	1
											989	98.9	544.524	503.987	1		989	98.9	529.571	510.138	1
											990	99	516.524	503.987	1		990	99	431.238	445.188	1
											991	99.1	538.762	503.987	1		991	99.1	464	445.188	1
											992	99.2	505	503.987	1		992	99.2	463.095	445.188	1
											993	99.3	568.429	503.987	1		993	99.3	465.19	445.188	1
											994	99.4	494.19	503.987	1		994	99.4	428.905	445.188	1
											995	99.5	535.857	503.987	1		995	99.5	456.048	445.188	1
											996	99.6	605.19	604.11	1		996	99.6	424.381	445.188	1
											997	99.7	623.571	604.11	1		997	99.7	537.714	510.138	1
											998	99.8	598.19	604.11	1		998	99.8	492.857	510.138	1
											999	99.9	590.333	604.11	1		999	99.9	483.857	510.138	1
											1000	100	620.905	604.11	1		1000	100	501.714	510.138	1
											1001	100.1	610.333	604.11	1		1001	100.1	575.19	510.138	1
											1002	100.2	643.048	604.11	1		1002	100.2	572.048	510.138	1
											1003	100.3	624	604.11	1		1003	100.3	521.476	510.138	1
											1004	100.4	656.19	604.11	1		1004	100.4	557.143	510.138	1
											1005	100.5	635.857	604.11	1		1005	100.5	570.048	510.138	1
											1006	100.6	546.619	604.11	1		1006	100.6	562.429	510.138	1
											1007	100.7	428.714	415.843	1		1007	100.7	509.143	510.138	1
											1008	100.8	418.81	415.843	1		1008	100.8	497.905	510.138	1
											1009	100.9	411.238	415.843	1		1009	100.9	491.571	510.138	1
											1010	101	477.857	415.843	1		1010	101	554.905	510.138	1
											1011	101.1	475.333	415.843	1		1011	101.1	482.857	510.138	1
											1012	101.2	441.048	415.843	1		1012	101.2	506.952	510.138	1
											1013	101.3	444.429	415.843	1		1013	101.3	497.905	510.138	1
											1014	101.4	535.238	503.987	1		1014	101.4	506.619	510.138	1
											1015	101.5	497.429	503.987	1		1015	101.5	479.619	510.138	1
											1016	101.6	440.667	415.843	1		1016	101.6	545.762	510.138	1
											1017	101.7	447.143	415.843	1		1017	101.7	544.857	510.138	1
											1018	101.8	444.048	415.843	1		1018	101.8	509.476	510.138	1
											1019	101.9	476.524	415.843	1		1019	101.9	535.286	510.138	1
											1020	102	432.048	415.843	1		1020	102	549.095	510.138	1
											1021	102.1	347.905	333.461	1		1021	102.1	506.667	510.138	1
											1022	102.2	325.619	333.461	1		1022	102.2	480.333	510.138	1
											1023	102.3	331.143	333.461	1		1023	102.3	549.095	510.138	1
											1024	102.4	335.381	333.461	1		1024	102.4	520.381	510.138	1
											1025	102.5	328.905	333.461	1		1025	102.5	505	510.138	1
											1026	102.6	416.571	415.843	1		1026	102.6	543	510.138	1
											1027	102.7	487.667	415.843	1		1027	102.7	546.333	510.138	1
											1028	102.8	455.857	415.843	1		1028	102.8	533.952	510.138	1
											1029	102.9	435.095	415.843	1		1029	102.9	509.905	510.138	1
											1030	103	439.762	415.843	1		1030	103	563	510.138	1
											1031	103.1	395.905	415.843	1		1031	103.1	514.524	510.138	1
											1032	103.2	417.762	415.843	1		1032	103.2	525.905	510.138	1
											1033	103.3	447.286	415.843	1		1033	103.3	483.714	510.138	1
											1034	103.4	428.095	415.843	1		1034	103.4	492.333	510.138	1
											1035	103.5	385.81	415.843	1		1035	103.5	544.048	576.767	1
											1036	103.6	428.095	415.843	1		1036	103.6	574.905	576.767	1
											1037	103.7	398.381	415.843	1		1037	103.7	573.857	576.767	1
											1038	103.8	506.381	503.987	1		1038	103.8	585.476	576.767	1
											1039	103.9	442.286	503.987	1		1039	103.9	503.714	576.767	1
											1040	104	454.429	503.987	1		1040	104	534.762	576.767	1
											1041	104.1	481.381	503.987	1		1041	104.1	541.333	576.767	1
											1042	104.2	475.619	503.987	1		1042	104.2	586.667	576.767	1
											1043	104.3	437.762	503.987	1		1043	104.3	523.048	576.767	1
											1044	104.4	542.048	503.987	1		1044	104.4	564.381	576.767	1
											1045	104.5	493.952	503.987	1		1045	104.5	584	576.767	1
											1046	104.6	462.429	503.987	1		1046	104.6	547.667	576.767	1
											1047	104.7	442.333	415.843	1		1047	104.7	553.476	576.767	1
											1048	104.8	418.667	415.843	1		1048	104.8	520.714	510.138	1
											1049	104.9	412.571	415.843	1		1049	104.9	513.619	510.138	1
											1050	105	424.333	415.843	1		1050	105	470.571	510.138	1
											1051	105.1	486.095	415.843	1		1051	105.1	572.571	510.138	1
											1052	105.2	408.524	415.843	1		1052	105.2	558.857	510.138	1
											1053	105.3	419.571	415.843	1		1053	105.3	577.048	510.138	1
											1054	105.4	451.19	415.843	1		1054	105.4	539.333	510.138	1
											1055	105.5	367.619	415.843	1		1055	105.5	473.857	510.138	1
											1056	105.6	401.619	415.843	1		1056	105.6	520.333	510.138	1
											1057	105.7	387.762	415.843	1		1057	105.7	516.19	510.138	1
											1058	105.8	456.429	415.843	1		1058	105.8	506.762	510.138	1
											1059	105.9	410.762	415.843	1		1059	105.9	550.333	510.138	1
											1060	106	462.714	415.843	1		1060	106	537.667	510.138	1
											1061	106.1	407.857	415.843	1		1061	106.1	500.952	510.138	1
											1062	106.2	437.381	415.843	1		1062	106.2	467.476	510.138	1
											1063	106.3	436.429	415.843	1		1063	106.3	499.429	510.138	1
											1064	106.4	438.381	415.843	1		1064	106.4	558.524	510.138	1
											1065	106.5	394.714	415.843	1		1065	106.5	561.048	510.138	1
											1066	106.6	441.667	415.843	1		1066	106.6	493.095	510.138	1
											1067	106.7	525.429	503.987	1		1067	106.7	561.143	510.138	1
											1068	106.8	501.476	503.987	1		1068	106.8	559.905	510.138	1
											1069	106.9	514.143	503.987	1		1069	106.9	484	510.138	1
											1070	107	398.762	415.843	1		1070	107	515.333	510.138	1
											1071	107.1	492.952	415.843	1		1071	107.1	552.714	510.138	1
											1072	107.2	437	415.843	1		1072	107.2	541.571	510.138	1
											1073	107.3	399.048	415.843	1		1073	107.3	571.619	510.138	1
											1074	107.4	446.286	415.843	1		1074	107.4	597.238	510.138	1
											1075	107.5	441.524	415.843	1		1075	107.5	483.762	510.138	1
											1076	107.6	418.952	415.843	1		1076	107.6	516.19	510.138	1
											1077	107.7	406.143	415.843	1		1077	107.7	524.857	510.138	1
											1078	107.8	478.524	415.843	1		1078	107.8	493.667	510.138	1
											1079	107.9	404.143	415.843	1		1079	107.9	508.81	510.138	1
											1080	108	437.048	415.843	1		1080	108	517.238	510.138	1
											1081	108.1	443.095	415.843	1		1081	108.1	546.952	510.138	1
											1082	108.2	405.095	415.843	1		1082	108.2	516.476	510.138	1
											1083	108.3	442.476	415.843	1		1083	108.3	534.143	510.138	1
											1084	108.4	386.143	415.843	1		1084	108.4	475.619	510.138	1
											1085	108.5	455.143	415.843	1		1085	108.5	434.238	445.188	1
											1086	108.6	419.429	415.843	1		1086	108.6	472.619	445.188	1
											1087	108.7	404.714	415.843	1		1087	108.7	486.571	445.188	1
											1088	108.8	414.143	415.843	1		1088	108.8	450.857	445.188	1
											1089	108.9	418.429	415.843	1		1089	108.9	460.333	445.188	1
											1090	109	430.476	415.843	1		1090	109	473.619	445.188	1
											1091	109.1	418.667	415.843	1		1091	109.1	453.619	445.188	1
											1092	109.2	501.571	415.843	1		1092	109.2	465.286	445.188	1
											1093	109.3	416.095	415.843	1		1093	109.3	431.571	445.188	1
											1094	109.4	440	415.843	1		1094	109.4	407.048	445.188	1
											1095	109.5	429.095	415.843	1		1095	109.5	444.714	445.188	1
											1096	109.6	409.714	415.843	1		1096	109.6	428.81	445.188	1
											1097	109.7	377.333	415.843	1		1097	109.7	429.81	445.188	1
											1098	109.8	416.381	415.843	1		1098	109.8	416.857	445.188	1
											1099	109.9	431.095	415.843	1		1099	109.9	450.857	445.188	1
											1100	110	433.81	415.843	1		1100	110	458.476	445.188	1
											1101	110.1	404.095	415.843	1		1101	110.1	394	445.188	1
											1102	110.2	465.143	503.987	1		1102	110.2	401.952	445.188	1
											1103	110.3	480.143	503.987	1		1103	110.3	503.048	445.188	1
											1104	110.4	463.286	503.987	1		1104	110.4	399.333	445.188	1
											1105	110.5	482	503.987	1		1105	110.5	435.333	445.188	1
											1106	110.6	471.714	503.987	1		1106	110.6	435.524	445.188	1
											1107	110.7	474.571	503.987	1		1107	110.7	423.095	445.188	1
											1108	110.8	512.048	503.987	1		1108	110.8	447.762	445.188	1
											1109	110.9	511	503.987	1		1109	110.9	424.095	445.188	1
											1110	111	467.143	503.987	1		1110	111	426.857	445.188	1
											1111	111.1	530.857	503.987	1		1111	111.1	445.286	445.188	1
											1112	111.2	520.333	503.987	1		1112	111.2	476.429	445.188	1
											1113	111.3	494.905	503.987	1		1113	111.3	460.762	445.188	1
											1114	111.4	534.762	503.987	1		1114	111.4	464.286	445.188	1
											1115	111.5	549.667	503.987	1		1115	111.5	444.952	445.188	1
											1116	111.6	549.524	503.987	1		1116	111.6	455.238	445.188	1
											1117	111.7	512.857	503.987	1		1117	111.7	429.381	445.188	1
											1118	111.8	534.143	503.987	1		1118	111.8	496.286	445.188	1
											1119	111.9	518.333	503.987	1		1119	111.9	461.667	445.188	1
											1120	112	519.238	503.987	1		1120	112	437.714	445.188	1
											1121	112.1	500.476	503.987	1		1121	112.1	472.286	445.188	1
											1122	112.2	499.714	503.987	1		1122	112.2	438.333	445.188	1
											1123	112.3	472.571	503.987	1		1123	112.3	414.381	445.188	1
											1124	112.4	484	503.987	1		1124	112.4	442.714	445.188	1
											1125	112.5	555.19	503.987	1		1125	112.5	441.714	445.188	1
											1126	112.6	549.19	503.987	1		1126	112.6	436.524	445.188	1
											1127	112.7	486.476	503.987	1		1127	112.7	425.381	445.188	1
											1128	112.8	547	503.987	1		1128	112.8	441.048	445.188	1
											1129	112.9	476.286	503.987	1		1129	112.9	472.381	445.188	1
											1130	113	475.381	503.987	1		1130	113	438.381	445.188	1
											1131	113.1	503.952	503.987	1		1131	113.1	473.238	445.188	1
											1132	113.2	511.762	503.987	1		1132	113.2	520.857	510.138	1
											1133	113.3	499.762	503.987	1		1133	113.3	550.429	510.138	1
											1134	113.4	516.524	503.987	1		1134	113.4	501.952	510.138	1
											1135	113.5	528.286	503.987	1		1135	113.5	522.19	510.138	1
											1136	113.6	540.857	503.987	1		1136	113.6	488.81	510.138	1
											1137	113.7	526.333	503.987	1		1137	113.7	538.952	510.138	1
											1138	113.8	567.048	503.987	1		1138	113.8	475.238	510.138	1
											1139	113.9	507.19	503.987	1		1139	113.9	518.571	510.138	1
											1140	114	532.095	503.987	1		1140	114	509	510.138	1
											1141	114.1	584.286	503.987	1		1141	114.1	487.857	510.138	1
											1142	114.2	583.762	503.987	1		1142	114.2	465.667	510.138	1
											1143	114.3	557.81	503.987	1		1143	114.3	592.619	510.138	1
											1144	114.4	501.238	503.987	1		1144	114.4	509.524	510.138	1
											1145	114.5	523.667	503.987	1		1145	114.5	551.048	510.138	1
											1146	114.6	573.667	604.11	1		1146	114.6	528.238	510.138	1
											1147	114.7	554.524	604.11	1		1147	114.7	474.095	510.138	1
											1148	114.8	552.571	604.11	1		1148	114.8	502.286	510.138	1
											1149	114.9	634.667	604.11	1		1149	114.9	548.524	510.138	1
											1150	115	558.619	604.11	1		1150	115	555.571	510.138	1
											1151	115.1	614.81	604.11	1		1151	115.1	535.333	510.138	1
											1152	115.2	520.905	503.987	1		1152	115.2	536.952	510.138	1
											1153	115.3	536.19	503.987	1		1153	115.3	505.81	510.138	1
											1154	115.4	560.476	503.987	1		1154	115.4	482.762	510.138	1
											1155	115.5	516.762	503.987	1		1155	115.5	562.952	576.767	1
											1156	115.6	572.857	503.987	1		1156	115.6	654.333	576.767	1
											1157	115.7	535.19	503.987	1		1157	115.7	663.429	576.767	1
											1158	115.8	528.095	503.987	1		1158	115.8	483.571	510.138	1
											1159	115.9	550.667	503.987	1		1159	115.9	492.667	510.138	1
											1160	116	526.286	503.987	1		1160	116	507.143	510.138	1
											1161	116.1	538.667	503.987	1		1161	116.1	513.524	510.138	1
											1162	116.2	554.762	503.987	1		1162	116.2	535.143	510.138	1
											1163	116.3	528.286	503.987	1		1163	116.3	622.619	576.767	1
											1164	116.4	523.238	503.987	1		1164	116.4	611.619	576.767	1
											1165	116.5	489.619	503.987	1		1165	116.5	611.952	576.767	1
											1166	116.6	523.238	503.987	1		1166	116.6	628.857	576.767	1
											1167	116.7	382.048	415.843	1		1167	116.7	562.143	576.767	1
											1168	116.8	387.286	415.843	1		1168	116.8	614.238	576.767	1
											1169	116.9	391.476	415.843	1		1169	116.9	591.429	576.767	1
											1170	117	352.714	415.843	1		1170	117	665.619	576.767	1
											1171	117.1	360.714	415.843	1		1171	117.1	641.429	576.767	1
											1172	117.2	391.571	415.843	1		1172	117.2	633.095	576.767	1
											1173	117.3	376.571	415.843	1		1173	117.3	611.381	576.767	1
											1174	117.4	352.714	415.843	1		1174	117.4	585.762	576.767	1
											1175	117.5	366.095	415.843	1		1175	117.5	515.524	510.138	1
											1176	117.6	416.095	415.843	1		1176	117.6	514.714	510.138	1
											1177	117.7	379.048	415.843	1		1177	117.7	481.81	510.138	1
											1178	117.8	346.524	415.843	1		1178	117.8	530.333	510.138	1
											1179	117.9	406.81	415.843	1		1179	117.9	497.476	510.138	1
											1180	118	386.476	415.843	1		1180	118	496.476	510.138	1
											1181	118.1	417.286	415.843	1		1181	118.1	480.429	510.138	1
											1182	118.2	404.381	415.843	1		1182	118.2	499.952	510.138	1
											1183	118.3	437.429	415.843	1		1183	118.3	404.333	510.138	1
											1184	118.4	393.905	415.843	1		1184	118.4	465	510.138	1
											1185	118.5	367.143	415.843	1		1185	118.5	508.762	510.138	1
											1186	118.6	351.81	415.843	1		1186	118.6	598.905	510.138	1
											1187	118.7	419.238	415.843	1		1187	118.7	437.762	445.188	1
											1188	118.8	379.286	415.843	1		1188	118.8	441.667	445.188	1
											1189	118.9	350.524	415.843	1		1189	118.9	466.762	445.188	1
											1190	119	388.381	415.843	1		1190	119	451.714	445.188	1
											1191	119.1	399.381	415.843	1		1191	119.1	434.381	445.188	1
											1192	119.2	400.333	415.843	1		1192	119.2	464.238	445.188	1
											1193	119.3	396.905	415.843	1		1193	119.3	503.19	445.188	1
											1194	119.4	386.333	415.843	1		1194	119.4	472.048	445.188	1
											1195	119.5	387.952	415.843	1		1195	119.5	426.619	445.188	1
											1196	119.6	430.952	415.843	1		1196	119.6	477.476	445.188	1
											1197	119.7	388.714	415.843	1		1197	119.7	418.762	445.188	1
											1198	119.8	399.81	415.843	1		1198	119.8	397.714	445.188	1
											1199	119.9	397.333	415.843	1		1199	119.9	475.143	445.188	1
											1200	120	393.19	415.843	1		1200	120	450.19	445.188	1
											1201	120.1	369.619	415.843	1		1201	120.1	460.381	445.188	1
											1202	120.2	376.762	415.843	1		1202	120.2	478.095	445.188	1
											1203	120.3	377.857	415.843	1		1203	120.3	428.286	445.188	1
											1204	120.4	397.143	415.843	1		1204	120.4	476.048	445.188	1
											1205	120.5	356.333	415.843	1		1205	120.5	431.905	445.188	1
											1206	120.6	410	415.843	1		1206	120.6	413.476	445.188	1
											1207	120.7	369.571	415.843	1		1207	120.7	429.333	445.188	1
											1208	120.8	403.429	415.843	1		1208	120.8	439.095	445.188	1
											1209	120.9	395.048	415.843	1		1209	120.9	415.857	445.188	1
											1210	121	411.667	415.843	1		1210	121	399.333	445.188	1
											1211	121.1	397.857	415.843	1		1211	121.1	420.905	445.188	1
											1212	121.2	384.81	415.843	1		1212	121.2	434.857	445.188	1
											1213	121.3	399.905	415.843	1		1213	121.3	435.048	445.188	1
											1214	121.4	393.667	415.843	1		1214	121.4	454.095	445.188	1
											1215	121.5	398.381	415.843	1		1215	121.5	405.571	445.188	1
											1216	121.6	355.286	415.843	1		1216	121.6	470.571	445.188	1
											1217	121.7	398.286	415.843	1		1217	121.7	426.762	445.188	1
											1218	121.8	426.476	415.843	1		1218	121.8	407.476	445.188	1
											1219	121.9	385.81	415.843	1		1219	121.9	437.571	445.188	1
											1220	122	418.952	415.843	1		1220	122	413.857	445.188	1
											1221	122.1	390	415.843	1		1221	122.1	387.048	445.188	1
											1222	122.2	405.524	415.843	1		1222	122.2	435.714	445.188	1
											1223	122.3	383.524	415.843	1		1223	122.3	436.238	445.188	1
											1224	122.4	376.524	415.843	1		1224	122.4	481.857	445.188	1
											1225	122.5	448.524	415.843	1		1225	122.5	428.333	445.188	1
											1226	122.6	476.143	415.843	1		1226	122.6	462.667	445.188	1
											1227	122.7	455	415.843	1		1227	122.7	444.905	445.188	1
											1228	122.8	452.762	415.843	1		1228	122.8	415.952	445.188	1
											1229	122.9	419.143	415.843	1		1229	122.9	455.952	445.188	1
											1230	123	409.333	415.843	1		1230	123	443.952	445.188	1
											1231	123.1	378.429	415.843	1		1231	123.1	464.095	445.188	1
											1232	123.2	355.905	333.461	1		1232	123.2	447.571	445.188	1
											1233	123.3	327.619	333.461	1		1233	123.3	442.571	445.188	1
											1234	123.4	357.381	333.461	1		1234	123.4	406.429	445.188	1
											1235	123.5	369.762	333.461	1		1235	123.5	440.714	445.188	1
											1236	123.6	362.762	333.461	1		1236	123.6	406	445.188	1
											1237	123.7	326.81	333.461	1		1237	123.7	458.476	445.188	1
											1238	123.8	326.19	333.461	1		1238	123.8	457.429	445.188	1
											1239	123.9	360.524	333.461	1		1239	123.9	559.667	510.138	1
											1240	124	313.381	333.461	1		1240	124	549.667	510.138	1
											1241	124.1	351.619	333.461	1		1241	124.1	489.476	510.138	1
											1242	124.2	310.762	333.461	1		1242	124.2	512.714	510.138	1
											1243	124.3	329.571	333.461	1		1243	124.3	504.238	510.138	1
											1244	124.4	305.952	333.461	1		1244	124.4	450.143	445.188	1
											1245	124.5	315.381	333.461	1		1245	124.5	468.19	445.188	1
											1246	124.6	355	333.461	1		1246	124.6	409.286	445.188	1
											1247	124.7	352.19	333.461	1		1247	124.7	442.286	445.188	1
											1248	124.8	359.381	333.461	1		1248	124.8	473.81	445.188	1
											1249	124.9	310.905	333.461	1		1249	124.9	447.429	445.188	1
											1250	125	321.667	333.461	1		1250	125	404.619	445.188	1
											1251	125.1	332.714	333.461	1		1251	125.1	417.81	445.188	1
											1252	125.2	334.095	333.461	1		1252	125.2	432.048	445.188	1
											1253	125.3	370.619	333.461	1		1253	125.3	429.524	445.188	1
											1254	125.4	344.571	333.461	1		1254	125.4	454.286	445.188	1
											1255	125.5	335.905	333.461	1		1255	125.5	437.905	445.188	1
											1256	125.6	329.81	333.461	1		1256	125.6	507.476	445.188	1
											1257	125.7	339.095	333.461	1		1257	125.7	432.571	445.188	1
											1258	125.8	308.905	333.461	1		1258	125.8	426.524	445.188	1
											1259	125.9	336.333	333.461	1		1259	125.9	436.714	445.188	1
											1260	126	328.524	333.461	1		1260	126	442.238	445.188	1
											1261	126.1	336.476	333.461	1		1261	126.1	409.905	445.188	1
											1262	126.2	335.381	333.461	1		1262	126.2	406.762	445.188	1
											1263	126.3	406.714	415.843	1		1263	126.3	448.476	445.188	1
											1264	126.4	350.19	415.843	1		1264	126.4	476.762	445.188	1
											1265	126.5	359.81	415.843	1		1265	126.5	410.905	445.188	1
											1266	126.6	440.952	415.843	1		1266	126.6	437.476	445.188	1
											1267	126.7	443.714	415.843	1		1267	126.7	432	445.188	1
											1268	126.8	434	415.843	1		1268	126.8	425.667	445.188	1
											1269	126.9	422.429	415.843	1		1269	126.9	476.857	445.188	1
											1270	127	488.048	415.843	1		1270	127	463.048	445.188	1
											1271	127.1	488.429	415.843	1		1271	127.1	468.857	445.188	1
											1272	127.2	353.333	333.461	1		1272	127.2	470.81	445.188	1
											1273	127.3	329	333.461	1		1273	127.3	465.381	445.188	1
											1274	127.4	320.238	333.461	1		1274	127.4	466.238	445.188	1
											1275	127.5	352.714	333.461	1		1275	127.5	440.714	445.188	1
											1276	127.6	316.81	333.461	1		1276	127.6	442.905	445.188	1
											1277	127.7	339.81	333.461	1		1277	127.7	461.667	445.188	1
											1278	127.8	328.429	333.461	1		1278	127.8	466.476	445.188	1
											1279	127.9	340.095	333.461	1		1279	127.9	343.524	372.422	1
											1280	128	443.143	415.843	1		1280	128	356.429	372.422	1
											1281	128.1	514.476	503.987	1		1281	128.1	375.905	372.422	1
											1282	128.2	546.048	503.987	1		1282	128.2	399.333	372.422	1
											1283	128.3	482.286	503.987	1		1283	128.3	416	372.422	1
											1284	128.4	514.429	503.987	1		1284	128.4	444.095	372.422	1
											1285	128.5	459.381	415.843	1		1285	128.5	388.333	372.422	1
											1286	128.6	415.286	415.843	1		1286	128.6	410.476	372.422	1
											1287	128.7	434.381	415.843	1		1287	128.7	399.381	372.422	1
											1288	128.8	428.762	415.843	1		1288	128.8	399.048	372.422	1
											1289	128.9	343.81	333.461	1		1289	128.9	399.19	372.422	1
											1290	129	376.143	333.461	1		1290	129	403.095	372.422	1
											1291	129.1	354.619	333.461	1		1291	129.1	380.238	372.422	1
											1292	129.2	353.81	333.461	1		1292	129.2	431.619	372.422	1
											1293	129.3	322.476	333.461	1		1293	129.3	374.238	372.422	1
											1294	129.4	362.476	333.461	1		1294	129.4	365.762	372.422	1
											1295	129.5	479.095	415.843	1		1295	129.5	417.476	372.422	1
											1296	129.6	426.952	415.843	1		1296	129.6	357.19	372.422	1
											1297	129.7	451.333	415.843	1		1297	129.7	369.476	372.422	1
											1298	129.8	477.905	415.843	1		1298	129.8	376.19	372.422	1
											1299	129.9	427.238	415.843	1		1299	129.9	384.571	372.422	1
											1300	130	395.952	415.843	1		1300	130	353.857	372.422	1
											1301	130.1	429.048	415.843	1		1301	130.1	382.095	372.422	1
											1302	130.2	396.952	415.843	1		1302	130.2	366.238	372.422	1
											1303	130.3	424.81	415.843	1		1303	130.3	369.714	372.422	1
											1304	130.4	450.524	415.843	1		1304	130.4	368.571	372.422	1
											1305	130.5	462.429	415.843	1		1305	130.5	331.905	372.422	1
											1306	130.6	487.048	415.843	1		1306	130.6	372.667	372.422	1
											1307	130.7	404.762	415.843	1		1307	130.7	382.571	372.422	1
											1308	130.8	425.524	415.843	1		1308	130.8	401.619	372.422	1
											1309	130.9	463.857	415.843	1		1309	130.9	320.81	372.422	1
											1310	131	430.048	415.843	1		1310	131	386.143	372.422	1
											1311	131.1	439.714	415.843	1		1311	131.1	372.476	372.422	1
											1312	131.2	449.048	415.843	1		1312	131.2	362.429	372.422	1
											1313	131.3	453	415.843	1		1313	131.3	367	372.422	1
											1314	131.4	413.762	415.843	1		1314	131.4	390.429	372.422	1
											1315	131.5	480.714	415.843	1		1315	131.5	337.333	372.422	1
											1316	131.6	449.524	415.843	1		1316	131.6	370.524	372.422	1
											1317	131.7	425.286	415.843	1		1317	131.7	355.524	372.422	1
											1318	131.8	428.619	415.843	1		1318	131.8	387.19	372.422	1
											1319	131.9	417.571	415.843	1		1319	131.9	361.429	372.422	1
											1320	132	450.238	415.843	1		1320	132	341.381	372.422	1
											1321	132.1	412.429	415.843	1		1321	132.1	339.238	372.422	1
											1322	132.2	437.905	415.843	1		1322	132.2	339.381	372.422	1
											1323	132.3	410.048	415.843	1		1323	132.3	328.095	372.422	1
											1324	132.4	410.476	415.843	1		1324	132.4	362.857	372.422	1
											1325	132.5	448.571	415.843	1		1325	132.5	342.143	372.422	1
											1326	132.6	400.286	415.843	1		1326	132.6	357.095	372.422	1
											1327	132.7	418.619	415.843	1		1327	132.7	396.857	372.422	1
											1328	132.8	418.333	415.843	1		1328	132.8	360.905	372.422	1
											1329	132.9	384.095	415.843	1		1329	132.9	383.381	372.422	1
											1330	133	443.286	415.843	1		1330	133	384.714	372.422	1
											1331	133.1	434.381	415.843	1		1331	133.1	394.762	372.422	1
											1332	133.2	395.238	415.843	1		1332	133.2	332.714	372.422	1
											1333	133.3	423.286	415.843	1		1333	133.3	334.714	372.422	1
											1334	133.4	440.714	415.843	1		1334	133.4	361.524	372.422	1
											1335	133.5	448.143	415.843	1		1335	133.5	375	372.422	1
											1336	133.6	430.381	415.843	1		1336	133.6	374.524	372.422	1
											1337	133.7	456.19	415.843	1		1337	133.7	388.238	372.422	1
											1338	133.8	393.667	415.843	1		1338	133.8	340.619	372.422	1
											1339	133.9	401.905	415.843	1		1339	133.9	347.238	372.422	1
											1340	134	384.714	415.843	1		1340	134	452.429	445.188	1
											1341	134.1	395.81	415.843	1		1341	134.1	448.333	445.188	1
											1342	134.2	425.476	415.843	1		1342	134.2	430.524	445.188	1
											1343	134.3	421.19	415.843	1		1343	134.3	416.952	445.188	1
											1344	134.4	406.333	415.843	1		1344	134.4	428.143	445.188	1
											1345	134.5	408.429	415.843	1		1345	134.5	429.19	445.188	1
											1346	134.6	420.857	415.843	1		1346	134.6	485.714	510.138	1
											1347	134.7	407.143	415.843	1		1347	134.7	504.048	510.138	1
											1348	134.8	431.429	415.843	1		1348	134.8	507.857	510.138	1
											1349	134.9	380.81	415.843	1		1349	134.9	479.048	510.138	1
											1350	135	432.19	415.843	1		1350	135	462.476	510.138	1
											1351	135.1	420.143	415.843	1		1351	135.1	497.429	510.138	1
											1352	135.2	406	415.843	1		1352	135.2	586	510.138	1
											1353	135.3	394.952	415.843	1		1353	135.3	434.333	510.138	1
											1354	135.4	401.714	415.843	1		1354	135.4	473.286	510.138	1
											1355	135.5	422.762	415.843	1		1355	135.5	480.81	510.138	1
											1356	135.6	418.524	415.843	1		1356	135.6	506.095	510.138	1
											1357	135.7	442.762	415.843	1		1357	135.7	484.571	510.138	1
											1358	135.8	428.81	415.843	1		1358	135.8	500.905	510.138	1
											1359	135.9	459.238	415.843	1		1359	135.9	506.905	510.138	1
											1360	136	475	415.843	1		1360	136	486.571	510.138	1
											1361	136.1	428.762	415.843	1		1361	136.1	479.952	510.138	1
											1362	136.2	478.714	415.843	1		1362	136.2	552.952	510.138	1
											1363	136.3	481.857	415.843	1		1363	136.3	554.095	510.138	1
											1364	136.4	409.095	415.843	1		1364	136.4	502.19	510.138	1
											1365	136.5	427.286	415.843	1		1365	136.5	478.476	510.138	1
											1366	136.6	434.476	415.843	1		1366	136.6	564.952	576.767	1
											1367	136.7	426.714	415.843	1		1367	136.7	649.952	576.767	1
											1368	136.8	436.333	415.843	1		1368	136.8	528.905	576.767	1
											1369	136.9	417.952	415.843	1		1369	136.9	468.524	576.767	1
											1370	137	425.19	415.843	1		1370	137	643.476	576.767	1
											1371	137.1	419.905	415.843	1		1371	137.1	546.952	576.767	1
											1372	137.2	422.571	415.843	1		1372	137.2	578.857	576.767	1
											1373	137.3	492.238	503.987	1		1373	137.3	544.714	576.767	1
											1374	137.4	574.19	503.987	1		1374	137.4	494.333	576.767	1
											1375	137.5	518.048	503.987	1		1375	137.5	549.286	576.767	1
											1376	137.6	440.81	415.843	1		1376	137.6	549.381	576.767	1
											1377	137.7	410.095	415.843	1		1377	137.7	528.19	576.767	1
											1378	137.8	406.095	415.843	1		1378	137.8	568.286	576.767	1
											1379	137.9	428.714	415.843	1		1379	137.9	529.857	576.767	1
											1380	138	431	415.843	1		1380	138	539.619	576.767	1
											1381	138.1	401.857	415.843	1		1381	138.1	639.524	576.767	1
											1382	138.2	463.524	415.843	1		1382	138.2	561.429	576.767	1
											1383	138.3	461.524	415.843	1		1383	138.3	531.667	576.767	1
											1384	138.4	427.143	415.843	1		1384	138.4	576.81	576.767	1
											1385	138.5	380.619	415.843	1		1385	138.5	524.762	576.767	1
											1386	138.6	421.714	415.843	1		1386	138.6	510.286	576.767	1
											1387	138.7	408.667	415.843	1		1387	138.7	631.476	576.767	1
											1388	138.8	394.524	415.843	1		1388	138.8	530.095	510.138	1
											1389	138.9	426.381	415.843	1		1389	138.9	522.952	510.138	1
											1390	139	421.048	415.843	1		1390	139	569.286	510.138	1
											1391	139.1	414.476	415.843	1		1391	139.1	478.714	510.138	1
											1392	139.2	450.905	415.843	1		1392	139.2	530.095	510.138	1
											1393	139.3	445.143	415.843	1		1393	139.3	501.286	510.138	1
											1394	139.4	435.857	415.843	1		1394	139.4	550.429	510.138	1
											1395	139.5	446.238	415.843	1		1395	139.5	515.667	510.138	1
											1396	139.6	409.857	415.843	1		1396	139.6	482.143	510.138	1
											1397	139.7	412.143	415.843	1		1397	139.7	503.286	510.138	1
											1398	139.8	428.619	415.843	1		1398	139.8	490.048	510.138	1
											1399	139.9	403.381	415.843	1		1399	139.9	497.048	510.138	1
											1400	140	455.619	415.843	1		1400	140	494.238	510.138	1
											1401	140.1	426.238	415.843	1		1401	140.1	540.762	510.138	1
											1402	140.2	442.619	415.843	1		1402	140.2	529.905	510.138	1
											1403	140.3	435.571	415.843	1		1403	140.3	441.333	510.138	1
											1404	140.4	442.286	415.843	1		1404	140.4	496	510.138	1
											1405	140.5	428.286	415.843	1		1405	140.5	512.524	510.138	1
											1406	140.6	436.095	415.843	1		1406	140.6	521.095	510.138	1
											1407	140.7	421.286	415.843	1		1407	140.7	477.524	510.138	1
											1408	140.8	437.571	415.843	1		1408	140.8	594.238	510.138	1
											1409	140.9	428.381	415.843	1		1409	140.9	517.048	510.138	1
											1410	141	431.667	415.843	1		1410	141	520.667	510.138	1
											1411	141.1	452.857	415.843	1		1411	141.1	442.095	510.138	1
											1412	141.2	459.714	415.843	1		1412	141.2	455.81	510.138	1
											1413	141.3	470.238	415.843	1		1413	141.3	519.524	510.138	1
											1414	141.4	424.286	415.843	1		1414	141.4	500.571	510.138	1
											1415	141.5	473.381	503.987	1		1415	141.5	513.81	510.138	1
											1416	141.6	467.095	503.987	1		1416	141.6	515.476	510.138	1
											1417	141.7	532.286	503.987	1		1417	141.7	486.381	510.138	1
											1418	141.8	526.857	503.987	1		1418	141.8	489.619	510.138	1
											1419	141.9	489.667	503.987	1		1419	141.9	478.857	510.138	1
											1420	142	518.143	503.987	1		1420	142	468	445.188	1
											1421	142.1	464.286	503.987	1		1421	142.1	443.762	445.188	1
											1422	142.2	462.476	503.987	1		1422	142.2	463.905	445.188	1
											1423	142.3	428.952	415.843	1		1423	142.3	418.667	445.188	1
											1424	142.4	440.952	415.843	1		1424	142.4	478.762	445.188	1
											1425	142.5	437.333	415.843	1		1425	142.5	436.048	445.188	1
											1426	142.6	403.571	415.843	1		1426	142.6	420.714	445.188	1
											1427	142.7	416.143	415.843	1		1427	142.7	402.286	445.188	1
											1428	142.8	446.333	415.843	1		1428	142.8	445.095	445.188	1
											1429	142.9	433.667	415.843	1		1429	142.9	404.429	445.188	1
											1430	143	399.905	415.843	1		1430	143	368.524	445.188	1
											1431	143.1	407.905	415.843	1		1431	143.1	459.476	445.188	1
											1432	143.2	425.286	415.843	1		1432	143.2	462.143	445.188	1
											1433	143.3	417.571	415.843	1		1433	143.3	472.333	445.188	1
											1434	143.4	380.286	415.843	1		1434	143.4	433.524	445.188	1
											1435	143.5	400.333	415.843	1		1435	143.5	489.524	445.188	1
											1436	143.6	400.857	415.843	1		1436	143.6	442.524	445.188	1
											1437	143.7	425	415.843	1		1437	143.7	507.81	445.188	1
											1438	143.8	459.81	415.843	1		1438	143.8	417.286	445.188	1
											1439	143.9	418.381	415.843	1		1439	143.9	452.762	445.188	1
											1440	144	475.381	415.843	1		1440	144	443.429	445.188	1
											1441	144.1	432.19	415.843	1		1441	144.1	503.619	445.188	1
											1442	144.2	441.238	415.843	1		1442	144.2	487.857	445.188	1
											1443	144.3	355.905	333.461	1		1443	144.3	493.286	445.188	1
											1444	144.4	327.286	333.461	1		1444	144.4	451.762	445.188	1
											1445	144.5	329.619	333.461	1		1445	144.5	421	445.188	1
											1446	144.6	351.286	333.461	1		1446	144.6	480.429	445.188	1
											1447	144.7	355.762	333.461	1		1447	144.7	457.905	445.188	1
											1448	144.8	331.524	333.461	1		1448	144.8	458.476	445.188	1
											1449	144.9	310.238	333.461	1		1449	144.9	495.19	510.138	1
											1450	145	326.381	333.461	1		1450	145	466.857	510.138	1
											1451	145.1	344.714	333.461	1		1451	145.1	487	510.138	1
											1452	145.2	346.429	333.461	1		1452	145.2	497.238	510.138	1
											1453	145.3	343.667	333.461	1		1453	145.3	518.905	510.138	1
											1454	145.4	327.619	333.461	1		1454	145.4	501.333	510.138	1
											1455	145.5	351.905	333.461	1		1455	145.5	454.476	445.188	1
											1456	145.6	331.524	333.461	1		1456	145.6	451.905	445.188	1
											1457	145.7	385.857	415.843	1		1457	145.7	425.905	445.188	1
											1458	145.8	385.429	415.843	1		1458	145.8	454.238	445.188	1
											1459	145.9	419.667	415.843	1		1459	145.9	438.857	445.188	1
											1460	146	453.952	415.843	1		1460	146	460.714	445.188	1
											1461	146.1	410.524	415.843	1		1461	146.1	442	445.188	1
											1462	146.2	373.19	415.843	1		1462	146.2	450.381	445.188	1
											1463	146.3	398.381	415.843	1		1463	146.3	404.143	445.188	1
											1464	146.4	387.476	415.843	1		1464	146.4	430.667	445.188	1
											1465	146.5	419	415.843	1		1465	146.5	424.524	445.188	1
											1466	146.6	450.667	415.843	1		1466	146.6	387.571	445.188	1
											1467	146.7	461.619	503.987	1		1467	146.7	468.048	445.188	1
											1468	146.8	507.238	503.987	1		1468	146.8	549.524	510.138	1
											1469	146.9	487.571	503.987	1		1469	146.9	468.905	510.138	1
											1470	147	479.524	503.987	1		1470	147	516.476	510.138	1
											1471	147.1	373.619	415.843	1		1471	147.1	552.095	576.767	1
											1472	147.2	372.524	415.843	1		1472	147.2	584	576.767	1
											1473	147.3	421.714	415.843	1		1473	147.3	561	576.767	1
											1474	147.4	399.619	415.843	1		1474	147.4	481.19	576.767	1
											1475	147.5	461.429	415.843	1		1475	147.5	592.143	576.767	1
											1476	147.6	423.667	415.843	1		1476	147.6	533.238	576.767	1
											1477	147.7	459.095	415.843	1		1477	147.7	561.714	576.767	1
											1478	147.8	440.81	415.843	1		1478	147.8	582.714	576.767	1
											1479	147.9	422.762	415.843	1		1479	147.9	496.524	510.138	1
											1480	148	469	415.843	1		1480	148	567	510.138	1
											1481	148.1	423.667	415.843	1		1481	148.1	442.476	510.138	1
											1482	148.2	454.381	415.843	1		1482	148.2	491.476	510.138	1
											1483	148.3	507.476	503.987	1		1483	148.3	506.429	510.138	1
											1484	148.4	468.19	503.987	1		1484	148.4	485.19	510.138	1
											1485	148.5	482.476	503.987	1		1485	148.5	479.048	510.138	1
											1486	148.6	510.286	503.987	1		1486	148.6	467.714	510.138	1
											1487	148.7	539.143	503.987	1		1487	148.7	501.524	510.138	1
											1488	148.8	495.857	503.987	1		1488	148.8	530.952	510.138	1
											1489	148.9	524.476	503.987	1		1489	148.9	536.667	510.138	1
											1490	149	505.524	503.987	1		1490	149	486.429	510.138	1
											1491	149.1	499.905	503.987	1		1491	149.1	460.048	510.138	1
											1492	149.2	517.429	503.987	1		1492	149.2	517.143	510.138	1
											1493	149.3	420.238	415.843	1		1493	149.3	505.143	510.138	1
											1494	149.4	441.714	415.843	1		1494	149.4	474.381	510.138	1
											1495	149.5	457.571	415.843	1		1495	149.5	513.857	510.138	1
											1496	149.6	422.714	415.843	1		1496	149.6	516.714	510.138	1
											1497	149.7	465.571	415.843	1		1497	149.7	528.571	510.138	1
											1498	149.8	459.286	415.843	1		1498	149.8	550.619	510.138	1
											1499	149.9	440	415.843	1		1499	149.9	469.143	510.138	1
											1500	150	414.143	415.843	1		1500	150	506.619	510.138	1
											1501	150.1	406.524	415.843	1		1501	150.1	491.095	510.138	1
											1502	150.2	430.667	415.843	1		1502	150.2	510.667	510.138	1
											1503	150.3	380.667	415.843	1		1503	150.3	526.619	510.138	1
											1504	150.4	430.667	415.843	1		1504	150.4	623.143	576.767	1
											1505	150.5	447.952	415.843	1		1505	150.5	549.714	576.767	1
											1506	150.6	318.81	333.461	1		1506	150.6	554.857	576.767	1
											1507	150.7	323.667	333.461	1		1507	150.7	489	576.767	1
											1508	150.8	315.524	333.461	1		1508	150.8	586.857	576.767	1
											1509	150.9	331.857	333.461	1		1509	150.9	560	576.767	1
											1510	151	323.381	333.461	1		1510	151	590.238	576.767	1
											1511	151.1	347.667	333.461	1		1511	151.1	533.762	510.138	1
											1512	151.2	370.81	415.843	1		1512	151.2	473.714	510.138	1
											1513	151.3	395.19	415.843	1		1513	151.3	545.905	510.138	1
											1514	151.4	361.905	333.461	1		1514	151.4	480.429	510.138	1
											1515	151.5	358.381	333.461	1		1515	151.5	455.905	510.138	1
											1516	151.6	357.524	333.461	1		1516	151.6	488.571	510.138	1
											1517	151.7	362.476	333.461	1		1517	151.7	537	510.138	1
											1518	151.8	339.095	333.461	1		1518	151.8	471.619	510.138	1
											1519	151.9	353.476	333.461	1		1519	151.9	569	576.767	1
											1520	152	350.857	333.461	1		1520	152	583.762	576.767	1
											1521	152.1	350.238	333.461	1		1521	152.1	586.048	576.767	1
											1522	152.2	314.048	333.461	1		1522	152.2	601.619	576.767	1
											1523	152.3	344.714	333.461	1		1523	152.3	525.714	576.767	1
											1524	152.4	413.952	415.843	1		1524	152.4	583.667	576.767	1
											1525	152.5	464.619	415.843	1		1525	152.5	507.381	576.767	1
											1526	152.6	350.762	415.843	1		1526	152.6	481.048	576.767	1
											1527	152.7	399.762	415.843	1		1527	152.7	587.524	576.767	1
											1528	152.8	329.571	333.461	1		1528	152.8	595.143	576.767	1
											1529	152.9	348.048	333.461	1		1529	152.9	494.857	576.767	1
											1530	153	360.048	333.461	1		1530	153	558.571	576.767	1
											1531	153.1	366.286	333.461	1		1531	153.1	580.333	576.767	1
											1532	153.2	329.476	333.461	1		1532	153.2	509.238	510.138	1
											1533	153.3	344.286	333.461	1		1533	153.3	533	510.138	1
											1534	153.4	361.81	333.461	1		1534	153.4	525.619	510.138	1
											1535	153.5	330.286	333.461	1		1535	153.5	495.333	510.138	1
											1536	153.6	325.429	333.461	1		1536	153.6	483	510.138	1
											1537	153.7	354.143	333.461	1		1537	153.7	423.81	445.188	1
											1538	153.8	339.762	333.461	1		1538	153.8	419.714	445.188	1
											1539	153.9	345.714	333.461	1		1539	153.9	433.952	445.188	1
											1540	154	342.333	333.461	1		1540	154	428.333	445.188	1
											1541	154.1	361.571	333.461	1		1541	154.1	427.286	445.188	1
											1542	154.2	380.286	333.461	1		1542	154.2	440.81	445.188	1
											1543	154.3	364.143	333.461	1		1543	154.3	410.714	445.188	1
											1544	154.4	339.571	333.461	1		1544	154.4	431.19	445.188	1
											1545	154.5	346.19	333.461	1		1545	154.5	439.524	445.188	1
											1546	154.6	339.476	333.461	1		1546	154.6	449.524	445.188	1
											1547	154.7	363.524	333.461	1		1547	154.7	423.238	445.188	1
											1548	154.8	350.095	333.461	1		1548	154.8	470.238	445.188	1
											1549	154.9	384.429	333.461	1		1549	154.9	477.048	445.188	1
											1550	155	371.238	333.461	1		1550	155	474.857	445.188	1
											1551	155.1	341.048	333.461	1		1551	155.1	433.286	445.188	1
											1552	155.2	342.333	333.461	1		1552	155.2	451.381	445.188	1
											1553	155.3	360.714	333.461	1		1553	155.3	473.381	445.188	1
											1554	155.4	339.333	333.461	1		1554	155.4	432.048	445.188	1
											1555	155.5	344.095	333.461	1		1555	155.5	422.333	445.188	1
											1556	155.6	355.429	333.461	1		1556	155.6	424.048	445.188	1
											1557	155.7	367.571	333.461	1		1557	155.7	419.857	445.188	1
											1558	155.8	380.952	333.461	1		1558	155.8	447.048	445.188	1
											1559	155.9	345.952	333.461	1		1559	155.9	432.714	445.188	1
											1560	156	341.048	333.461	1		1560	156	452.381	445.188	1
											1561	156.1	340.429	333.461	1		1561	156.1	436.333	445.188	1
											1562	156.2	301	333.461	1		1562	156.2	464	445.188	1
											1563	156.3	335.571	333.461	1		1563	156.3	423.905	445.188	1
											1564	156.4	353.714	333.461	1		1564	156.4	455.476	445.188	1
											1565	156.5	339.714	333.461	1		1565	156.5	479.048	445.188	1
											1566	156.6	345.476	333.461	1		1566	156.6	492.429	445.188	1
											1567	156.7	345.762	333.461	1		1567	156.7	497.381	445.188	1
											1568	156.8	349.905	333.461	1		1568	156.8	479.619	445.188	1
											1569	156.9	314.429	333.461	1		1569	156.9	416	445.188	1
											1570	157	334.429	333.461	1		1570	157	425.143	445.188	1
											1571	157.1	368	333.461	1		1571	157.1	423.905	445.188	1
											1572	157.2	359.714	333.461	1		1572	157.2	420.381	445.188	1
											1573	157.3	337.381	333.461	1		1573	157.3	436.286	445.188	1
											1574	157.4	345.952	333.461	1		1574	157.4	424.619	445.188	1
											1575	157.5	360.571	333.461	1		1575	157.5	468.952	445.188	1
											1576	157.6	349.571	333.461	1		1576	157.6	419.143	445.188	1
											1577	157.7	309.81	333.461	1		1577	157.7	460.667	445.188	1
											1578	157.8	350.19	333.461	1		1578	157.8	400.333	445.188	1
											1579	157.9	318.762	333.461	1		1579	157.9	447.667	445.188	1
											1580	158	330.762	333.461	1		1580	158	466.429	445.188	1
											1581	158.1	333.714	333.461	1		1581	158.1	423.571	445.188	1
											1582	158.2	413.429	415.843	1		1582	158.2	465.667	445.188	1
											1583	158.3	408.143	415.843	1		1583	158.3	508.524	510.138	1
											1584	158.4	460.857	415.843	1		1584	158.4	492.286	510.138	1
											1585	158.5	421.286	415.843	1		1585	158.5	573.333	510.138	1
											1586	158.6	430.143	415.843	1		1586	158.6	516	510.138	1
											1587	158.7	426.571	415.843	1		1587	158.7	579.095	510.138	1
											1588	158.8	409.714	415.843	1		1588	158.8	450.762	445.188	1
											1589	158.9	391.762	415.843	1		1589	158.9	488.143	445.188	1
											1590	159	439.333	415.843	1		1590	159	421.476	445.188	1
											1591	159.1	433.524	415.843	1		1591	159.1	428.619	445.188	1
											1592	159.2	442.333	415.843	1		1592	159.2	434.667	445.188	1
											1593	159.3	410.429	415.843	1		1593	159.3	405.286	445.188	1
											1594	159.4	413.143	415.843	1		1594	159.4	454.19	445.188	1
											1595	159.5	445.048	415.843	1		1595	159.5	431.333	445.188	1
											1596	159.6	406.905	415.843	1		1596	159.6	411.286	445.188	1
											1597	159.7	419.333	415.843	1		1597	159.7	404.286	445.188	1
											1598	159.8	402.286	415.843	1		1598	159.8	419.286	445.188	1
											1599	159.9	406.762	415.843	1		1599	159.9	437	445.188	1
											1600	160	497.333	503.987	1		1600	160	411.381	445.188	1
											1601	160.1	509.524	503.987	1		1601	160.1	384.381	445.188	1
											1602	160.2	464.905	503.987	1		1602	160.2	404.095	445.188	1
											1603	160.3	413.571	415.843	1		1603	160.3	407.905	445.188	1
											1604	160.4	439.81	415.843	1		1604	160.4	430.762	445.188	1
											1605	160.5	418.524	415.843	1		1605	160.5	423.571	445.188	1
											1606	160.6	442.762	415.843	1		1606	160.6	413.524	445.188	1
											1607	160.7	435.571	415.843	1		1607	160.7	397	445.188	1
											1608	160.8	471	415.843	1		1608	160.8	386.476	445.188	1
											1609	160.9	452.095	415.843	1		1609	160.9	433.714	445.188	1
											1610	161	402	415.843	1		1610	161	416.381	445.188	1
											1611	161.1	378.524	415.843	1		1611	161.1	416.571	445.188	1
											1612	161.2	434.238	415.843	1		1612	161.2	412.429	445.188	1
											1613	161.3	406.238	415.843	1		1613	161.3	404.048	445.188	1
											1614	161.4	399.714	415.843	1		1614	161.4	416.571	445.188	1
											1615	161.5	412	415.843	1		1615	161.5	380	445.188	1
											1616	161.6	471.905	415.843	1		1616	161.6	399.143	445.188	1
											1617	161.7	434.238	415.843	1		1617	161.7	380.571	445.188	1
											1618	161.8	392.143	415.843	1		1618	161.8	412.381	445.188	1
											1619	161.9	448.381	415.843	1		1619	161.9	405.524	445.188	1
											1620	162	440.667	415.843	1		1620	162	442.19	445.188	1
											1621	162.1	410.143	415.843	1		1621	162.1	422.381	445.188	1
											1622	162.2	446.286	415.843	1		1622	162.2	430.095	445.188	1
											1623	162.3	401.667	415.843	1		1623	162.3	414.19	445.188	1
											1624	162.4	439.619	415.843	1		1624	162.4	420.952	445.188	1
											1625	162.5	379.667	415.843	1		1625	162.5	390.905	445.188	1
											1626	162.6	411.381	415.843	1		1626	162.6	434.619	445.188	1
											1627	162.7	394.524	415.843	1		1627	162.7	396.524	445.188	1
											1628	162.8	428.476	415.843	1		1628	162.8	481.238	445.188	1
											1629	162.9	428.905	415.843	1		1629	162.9	412.81	445.188	1
											1630	163	392.381	415.843	1		1630	163	455.19	445.188	1
											1631	163.1	418.333	415.843	1		1631	163.1	429.857	445.188	1
											1632	163.2	453.667	415.843	1		1632	163.2	469.429	445.188	1
											1633	163.3	450.762	415.843	1		1633	163.3	438.905	445.188	1
											1634	163.4	436.571	415.843	1		1634	163.4	449.905	445.188	1
											1635	163.5	471.143	415.843	1		1635	163.5	482.81	510.138	1
											1636	163.6	428.286	415.843	1		1636	163.6	522.333	510.138	1
											1637	163.7	433.714	415.843	1		1637	163.7	610.524	510.138	1
											1638	163.8	312.81	333.461	1		1638	163.8	541.19	510.138	1
											1639	163.9	286.524	333.461	1		1639	163.9	535.952	510.138	1
											1640	164	332.048	333.461	1		1640	164	527	510.138	1
											1641	164.1	318.857	333.461	1		1641	164.1	422.952	445.188	1
											1642	164.2	325	333.461	1		1642	164.2	439.048	445.188	1
											1643	164.3	311.667	333.461	1		1643	164.3	447.81	445.188	1
											1644	164.4	334.429	333.461	1		1644	164.4	432.429	445.188	1
											1645	164.5	320.381	333.461	1		1645	164.5	458.571	445.188	1
											1646	164.6	320.667	333.461	1		1646	164.6	420.238	445.188	1
											1647	164.7	319.714	333.461	1		1647	164.7	432.095	445.188	1
											1648	164.8	341.095	333.461	1		1648	164.8	429.714	445.188	1
											1649	164.9	339.714	333.461	1		1649	164.9	425.952	445.188	1
											1650	165	359.857	333.461	1		1650	165	426.619	445.188	1
											1651	165.1	328.143	333.461	1		1651	165.1	421.619	445.188	1
											1652	165.2	395.286	415.843	1		1652	165.2	424.238	445.188	1
											1653	165.3	409.952	415.843	1		1653	165.3	419.762	445.188	1
											1654	165.4	392.238	415.843	1		1654	165.4	429.19	445.188	1
											1655	165.5	413.238	415.843	1		1655	165.5	448.429	445.188	1
											1656	165.6	424.571	415.843	1		1656	165.6	404.095	445.188	1
											1657	165.7	410.381	415.843	1		1657	165.7	413.762	445.188	1
											1658	165.8	435.286	415.843	1		1658	165.8	410.429	445.188	1
											1659	165.9	421.095	415.843	1		1659	165.9	442.714	445.188	1
											1660	166	401.238	415.843	1		1660	166	454.333	445.188	1
											1661	166.1	405.286	415.843	1		1661	166.1	423.762	445.188	1
											1662	166.2	422.286	415.843	1		1662	166.2	440.857	445.188	1
											1663	166.3	415	415.843	1		1663	166.3	398.143	445.188	1
											1664	166.4	400	415.843	1		1664	166.4	446.333	445.188	1
											1665	166.5	386.19	415.843	1		1665	166.5	483.81	445.188	1
											1666	166.6	396	415.843	1		1666	166.6	462.905	445.188	1
											1667	166.7	421.143	415.843	1		1667	166.7	427.714	445.188	1
											1668	166.8	470.81	503.987	1		1668	166.8	441.476	445.188	1
											1669	166.9	497.429	503.987	1		1669	166.9	447.905	445.188	1
											1670	167	491.952	503.987	1		1670	167	407.238	445.188	1
											1671	167.1	528.238	503.987	1		1671	167.1	425.905	445.188	1
											1672	167.2	477.333	503.987	1		1672	167.2	452.857	445.188	1
											1673	167.3	470.524	503.987	1		1673	167.3	416.667	445.188	1
											1674	167.4	497.524	503.987	1		1674	167.4	430.429	445.188	1
											1675	167.5	498.571	503.987	1		1675	167.5	430.19	445.188	1
											1676	167.6	491.762	503.987	1		1676	167.6	430.048	445.188	1
											1677	167.7	469.667	503.987	1		1677	167.7	427.286	445.188	1
											1678	167.8	487.524	503.987	1		1678	167.8	430.762	445.188	1
											1679	167.9	441.619	415.843	1		1679	167.9	431.524	445.188	1
											1680	168	420.238	415.843	1		1680	168	403.714	445.188	1
											1681	168.1	414.524	415.843	1		1681	168.1	504.238	510.138	1
											1682	168.2	414.429	415.843	1		1682	168.2	558.762	510.138	1
											1683	168.3	428.81	415.843	1		1683	168.3	454.571	445.188	1
											1684	168.4	428.19	415.843	1		1684	168.4	441.762	445.188	1
											1685	168.5	424.19	415.843	1		1685	168.5	394.762	445.188	1
											1686	168.6	361	415.843	1		1686	168.6	413.048	445.188	1
											1687	168.7	417.81	415.843	1		1687	168.7	403.048	445.188	1
											1688	168.8	428.81	415.843	1		1688	168.8	414	445.188	1
											1689	168.9	416.524	415.843	1		1689	168.9	435.429	445.188	1
											1690	169	432.333	415.843	1		1690	169	425.286	445.188	1
											1691	169.1	408.619	415.843	1		1691	169.1	459.667	445.188	1
											1692	169.2	427.667	415.843	1		1692	169.2	451.095	445.188	1
											1693	169.3	409.238	415.843	1		1693	169.3	431.429	445.188	1
											1694	169.4	433.476	415.843	1		1694	169.4	468.19	445.188	1
											1695	169.5	440.429	415.843	1		1695	169.5	485.476	445.188	1
											1696	169.6	422.429	415.843	1		1696	169.6	433.762	445.188	1
											1697	169.7	455	415.843	1		1697	169.7	421.667	445.188	1
											1698	169.8	450.19	415.843	1		1698	169.8	452.762	445.188	1
											1699	169.9	402.143	415.843	1		1699	169.9	570.333	510.138	1
											1700	170	450.238	415.843	1		1700	170	523.476	510.138	1
											1701	170.1	435.857	415.843	1		1701	170.1	488.857	510.138	1
											1702	170.2	427.857	415.843	1		1702	170.2	472	445.188	1
											1703	170.3	436.571	415.843	1		1703	170.3	455	445.188	1
											1704	170.4	431.905	415.843	1		1704	170.4	435.952	445.188	1
											1705	170.5	449.048	415.843	1		1705	170.5	460.81	445.188	1
											1706	170.6	420.476	415.843	1		1706	170.6	430.762	445.188	1
											1707	170.7	464.81	503.987	1		1707	170.7	475.571	445.188	1
											1708	170.8	536.381	503.987	1		1708	170.8	413.476	445.188	1
											1709	170.9	546.095	503.987	1		1709	170.9	434.952	445.188	1
											1710	171	467.667	503.987	1		1710	171	423.619	445.188	1
											1711	171.1	427.143	415.843	1		1711	171.1	421.619	445.188	1
											1712	171.2	430.095	415.843	1		1712	171.2	477.762	445.188	1
											1713	171.3	418.667	415.843	1		1713	171.3	454.81	445.188	1
											1714	171.4	392.286	415.843	1		1714	171.4	448	445.188	1
											1715	171.5	426.714	415.843	1		1715	171.5	474.381	445.188	1
											1716	171.6	470.143	415.843	1		1716	171.6	456.905	445.188	1
											1717	171.7	441.667	415.843	1		1717	171.7	468	445.188	1
											1718	171.8	446.238	415.843	1		1718	171.8	482.429	445.188	1
											1719	171.9	427.571	415.843	1		1719	171.9	463.762	445.188	1
											1720	172	397.81	415.843	1		1720	172	432.905	445.188	1
											1721	172.1	374.429	415.843	1		1721	172.1	440.762	445.188	1
											1722	172.2	396.762	415.843	1		1722	172.2	454.429	445.188	1
											1723	172.3	403.81	415.843	1		1723	172.3	471.667	445.188	1
											1724	172.4	383.19	415.843	1		1724	172.4	447.524	445.188	1
											1725	172.5	375.238	415.843	1		1725	172.5	455.095	445.188	1
											1726	172.6	415.429	415.843	1		1726	172.6	443.714	445.188	1
											1727	172.7	426.524	415.843	1		1727	172.7	470.952	445.188	1
											1728	172.8	419.714	415.843	1		1728	172.8	449.857	445.188	1
											1729	172.9	393	415.843	1		1729	172.9	481.524	445.188	1
											1730	173	391.857	415.843	1		1730	173	440.524	445.188	1
											1731	173.1	324.571	333.461	1		1731	173.1	446.952	445.188	1
											1732	173.2	293.667	333.461	1		1732	173.2	453.714	445.188	1
											1733	173.3	327.143	333.461	1		1733	173.3	475.381	445.188	1
											1734	173.4	321.619	333.461	1		1734	173.4	454.333	445.188	1
											1735	173.5	331.667	333.461	1		1735	173.5	466.667	445.188	1
											1736	173.6	330.095	333.461	1		1736	173.6	483.524	445.188	1
											1737	173.7	334.476	333.461	1		1737	173.7	469.762	445.188	1
											1738	173.8	336.952	333.461	1		1738	173.8	480.286	445.188	1
											1739	173.9	308.381	333.461	1		1739	173.9	470.619	445.188	1
											1740	174	328.143	333.461	1		1740	174	492.762	445.188	1
											1741	174.1	321.238	333.461	1		1741	174.1	485.238	445.188	1
											1742	174.2	320.048	333.461	1		1742	174.2	450.429	445.188	1
											1743	174.3	368.571	333.461	1		1743	174.3	459.286	445.188	1
											1744	174.4	363.619	333.461	1		1744	174.4	474.333	445.188	1
											1745	174.5	328.952	333.461	1		1745	174.5	425.286	445.188	1
											1746	174.6	327.619	333.461	1		1746	174.6	445.714	445.188	1
											1747	174.7	300.476	333.461	1		1747	174.7	474.238	445.188	1
											1748	174.8	314.667	333.461	1		1748	174.8	472.095	445.188	1
											1749	174.9	311.048	333.461	1		1749	174.9	486.619	510.138	1
											1750	175	348.524	333.461	1		1750	175	504.19	510.138	1
											1751	175.1	319.476	333.461	1		1751	175.1	543.952	510.138	1
											1752	175.2	330.095	333.461	1		1752	175.2	588.524	510.138	1
											1753	175.3	314.476	333.461	1		1753	175.3	499.333	510.138	1
											1754	175.4	306.476	333.461	1		1754	175.4	457.143	445.188	1
											1755	175.5	318.762	333.461	1		1755	175.5	466.619	445.188	1
											1756	175.6	298.571	333.461	1		1756	175.6	420.571	445.188	1
											1757	175.7	332.857	333.461	1		1757	175.7	472.048	445.188	1
											1758	175.8	316.905	333.461	1		1758	175.8	450.286	445.188	1
											1759	175.9	332	333.461	1		1759	175.9	487.905	445.188	1
											1760	176	321.048	333.461	1		1760	176	451.762	445.188	1
											1761	176.1	308.095	333.461	1		1761	176.1	459	445.188	1
											1762	176.2	320.286	333.461	1		1762	176.2	524.476	510.138	1
											1763	176.3	314.619	333.461	1		1763	176.3	534.81	510.138	1
											1764	176.4	310.667	333.461	1		1764	176.4	561.571	510.138	1
											1765	176.5	346.333	333.461	1		1765	176.5	548.857	510.138	1
											1766	176.6	311.714	333.461	1		1766	176.6	510.81	510.138	1
											1767	176.7	318.429	333.461	1		1767	176.7	555.619	510.138	1
											1768	176.8	321.714	333.461	1		1768	176.8	513.19	510.138	1
											1769	176.9	315.381	333.461	1		1769	176.9	538.714	510.138	1
											1770	177	316.619	333.461	1		1770	177	528.571	510.138	1
											1771	177.1	338.524	333.461	1		1771	177.1	524.905	510.138	1
											1772	177.2	309	333.461	1		1772	177.2	481.286	510.138	1
											1773	177.3	330.476	333.461	1		1773	177.3	517.333	510.138	1
											1774	177.4	333.857	333.461	1		1774	177.4	576.048	510.138	1
											1775	177.5	306.381	333.461	1		1775	177.5	499.857	510.138	1
											1776	177.6	285.667	333.461	1		1776	177.6	451.048	510.138	1
											1777	177.7	302.476	333.461	1		1777	177.7	478.619	510.138	1
											1778	177.8	319.571	333.461	1		1778	177.8	504.857	510.138	1
											1779	177.9	333.095	333.461	1		1779	177.9	447.81	510.138	1
											1780	178	300.857	333.461	1		1780	178	509.571	510.138	1
											1781	178.1	358.571	333.461	1		1781	178.1	497.619	510.138	1
											1782	178.2	336.19	333.461	1		1782	178.2	570.81	510.138	1
											1783	178.3	350.095	333.461	1		1783	178.3	531.143	510.138	1
											1784	178.4	363.143	333.461	1		1784	178.4	567.762	510.138	1
											1785	178.5	346.19	333.461	1		1785	178.5	545.81	510.138	1
											1786	178.6	352.714	333.461	1		1786	178.6	578.619	510.138	1
											1787	178.7	327.619	333.461	1		1787	178.7	498.286	510.138	1
											1788	178.8	321.952	333.461	1		1788	178.8	494.667	510.138	1
											1789	178.9	310.952	333.461	1		1789	178.9	553.476	510.138	1
											1790	179	312.81	333.461	1		1790	179	518.19	510.138	1
											1791	179.1	306.619	333.461	1		1791	179.1	540.286	510.138	1
											1792	179.2	342.619	333.461	1		1792	179.2	533.952	510.138	1
											1793	179.3	335.762	333.461	1		1793	179.3	568.429	510.138	1
											1794	179.4	362.857	333.461	1		1794	179.4	535.619	510.138	1
											1795	179.5	317.571	333.461	1		1795	179.5	497.476	510.138	1
											1796	179.6	311.095	333.461	1		1796	179.6	547.143	510.138	1
											1797	179.7	315.048	333.461	1		1797	179.7	495.333	510.138	1
											1798	179.8	330.667	333.461	1		1798	179.8	492.429	510.138	1
											1799	179.9	333.143	333.461	1		1799	179.9	462.381	510.138	1
											1800	180	304.667	333.461	1		1800	180	461.286	510.138	1
											1801	180.1	304.714	333.461	1		1801	180.1	477.81	510.138	1
											1802	180.2	344.619	333.461	1		1802	180.2	455.286	510.138	1
											1803	180.3	319.143	333.461	1		1803	180.3	562.714	510.138	1
											1804	180.4	331.571	333.461	1		1804	180.4	527.143	510.138	1
											1805	180.5	390.714	415.843	1		1805	180.5	460.429	510.138	1
											1806	180.6	352.714	415.843	1		1806	180.6	546.714	510.138	1
											1807	180.7	369.762	415.843	1		1807	180.7	581.333	510.138	1
											1808	180.8	419.381	415.843	1		1808	180.8	523.238	510.138	1
											1809	180.9	396.81	415.843	1		1809	180.9	474.619	510.138	1
											1810	181	423.381	415.843	1		1810	181	495.714	510.138	1
											1811	181.1	408.905	415.843	1		1811	181.1	548.571	510.138	1
											1812	181.2	421.667	415.843	1		1812	181.2	496.048	510.138	1
											1813	181.3	368.667	415.843	1		1813	181.3	564.905	510.138	1
											1814	181.4	408.048	415.843	1		1814	181.4	510.571	510.138	1
											1815	181.5	399.571	415.843	1		1815	181.5	520.048	510.138	1
											1816	181.6	426.19	415.843	1		1816	181.6	561.143	510.138	1
											1817	181.7	389.857	415.843	1		1817	181.7	562.048	510.138	1
											1818	181.8	442.81	415.843	1		1818	181.8	496.857	510.138	1
											1819	181.9	410.619	415.843	1		1819	181.9	537.524	510.138	1
											1820	182	438.762	415.843	1		1820	182	567.381	576.767	1
											1821	182.1	415.286	415.843	1		1821	182.1	565.571	576.767	1
											1822	182.2	362.667	415.843	1		1822	182.2	579	576.767	1
											1823	182.3	414.619	415.843	1		1823	182.3	588.476	576.767	1
											1824	182.4	451.143	415.843	1		1824	182.4	546.238	576.767	1
											1825	182.5	423.81	415.843	1		1825	182.5	581.619	576.767	1
											1826	182.6	394.762	415.843	1		1826	182.6	598.238	576.767	1
											1827	182.7	437.857	415.843	1		1827	182.7	506.952	510.138	1
											1828	182.8	394.286	415.843	1		1828	182.8	548.095	510.138	1
											1829	182.9	361.81	415.843	1		1829	182.9	523.571	510.138	1
											1830	183	408.905	415.843	1		1830	183	514.857	510.138	1
											1831	183.1	452.095	415.843	1		1831	183.1	554.19	510.138	1
											1832	183.2	366.857	415.843	1		1832	183.2	541.095	510.138	1
											1833	183.3	401.667	415.843	1		1833	183.3	566.286	510.138	1
											1834	183.4	310.143	333.461	1		1834	183.4	525.619	510.138	1
											1835	183.5	301.476	333.461	1		1835	183.5	557.857	510.138	1
											1836	183.6	324.238	333.461	1		1836	183.6	561.571	510.138	1
											1837	183.7	299.571	333.461	1		1837	183.7	545.476	510.138	1
											1838	183.8	381.286	415.843	1		1838	183.8	507.143	510.138	1
											1839	183.9	398.19	415.843	1		1839	183.9	493.81	510.138	1
											1840	184	411.286	415.843	1		1840	184	518.714	510.138	1
											1841	184.1	404.571	415.843	1		1841	184.1	503.333	510.138	1
											1842	184.2	438.905	415.843	1		1842	184.2	521.857	510.138	1
											1843	184.3	391.238	415.843	1		1843	184.3	521.952	510.138	1
											1844	184.4	422.429	415.843	1		1844	184.4	545.619	510.138	1
											1845	184.5	377.286	415.843	1		1845	184.5	497.571	510.138	1
											1846	184.6	406.762	415.843	1		1846	184.6	551	510.138	1
											1847	184.7	422.571	415.843	1		1847	184.7	485.571	510.138	1
											1848	184.8	359.667	415.843	1		1848	184.8	531.143	510.138	1
											1849	184.9	453.476	415.843	1		1849	184.9	525.19	510.138	1
											1850	185	428.333	415.843	1		1850	185	514.857	510.138	1
											1851	185.1	443.762	415.843	1		1851	185.1	526.571	510.138	1
											1852	185.2	395.524	415.843	1		1852	185.2	574.619	510.138	1
											1853	185.3	414.857	415.843	1		1853	185.3	501.952	510.138	1
											1854	185.4	434.714	415.843	1		1854	185.4	576.619	510.138	1
											1855	185.5	436.238	415.843	1		1855	185.5	488.333	510.138	1
											1856	185.6	397.238	415.843	1		1856	185.6	530	510.138	1
											1857	185.7	349.286	333.461	1		1857	185.7	530.524	510.138	1
											1858	185.8	328.095	333.461	1		1858	185.8	490.429	510.138	1
											1859	185.9	316.095	333.461	1		1859	185.9	542.143	576.767	1
											1860	186	350.143	333.461	1		1860	186	616.571	576.767	1
											1861	186.1	339.381	333.461	1		1861	186.1	654.19	576.767	1
											1862	186.2	318.429	333.461	1		1862	186.2	598.048	576.767	1
											1863	186.3	315.429	333.461	1		1863	186.3	575.619	576.767	1
											1864	186.4	338.476	333.461	1		1864	186.4	558.048	576.767	1
											1865	186.5	322.429	333.461	1		1865	186.5	547.667	576.767	1
											1866	186.6	333.286	333.461	1		1866	186.6	586.048	576.767	1
											1867	186.7	333.762	333.461	1		1867	186.7	506.381	510.138	1
											1868	186.8	287.667	333.461	1		1868	186.8	502.048	510.138	1
											1869	186.9	360.19	333.461	1		1869	186.9	466.238	510.138	1
											1870	187	331.524	333.461	1		1870	187	457.19	510.138	1
											1871	187.1	300.381	333.461	1		1871	187.1	495.048	510.138	1
											1872	187.2	320.333	333.461	1		1872	187.2	497.81	510.138	1
											1873	187.3	321.143	333.461	1		1873	187.3	471.571	445.188	1
											1874	187.4	294.667	333.461	1		1874	187.4	476.048	445.188	1
											1875	187.5	325.143	333.461	1		1875	187.5	443.333	445.188	1
											1876	187.6	312.619	333.461	1		1876	187.6	469.857	445.188	1
											1877	187.7	306.762	333.461	1		1877	187.7	468.476	445.188	1
											1878	187.8	299.143	333.461	1		1878	187.8	471.429	445.188	1
											1879	187.9	336.429	333.461	1		1879	187.9	425.905	445.188	1
											1880	188	319.238	333.461	1		1880	188	460.333	445.188	1
											1881	188.1	307.571	333.461	1		1881	188.1	475.619	445.188	1
											1882	188.2	347.429	333.461	1		1882	188.2	484.952	445.188	1
											1883	188.3	307.524	333.461	1		1883	188.3	429.143	445.188	1
											1884	188.4	353.19	333.461	1		1884	188.4	480.381	445.188	1
											1885	188.5	348	333.461	1		1885	188.5	442.19	445.188	1
											1886	188.6	315	333.461	1		1886	188.6	387.619	445.188	1
											1887	188.7	300.571	333.461	1		1887	188.7	451.857	445.188	1
											1888	188.8	308.333	333.461	1		1888	188.8	410.333	445.188	1
											1889	188.9	295.905	333.461	1		1889	188.9	460.714	445.188	1
											1890	189	316.81	333.461	1		1890	189	414.524	445.188	1
											1891	189.1	321.524	333.461	1		1891	189.1	472.286	445.188	1
											1892	189.2	336.143	333.461	1		1892	189.2	463.667	445.188	1
											1893	189.3	339.143	333.461	1		1893	189.3	460.333	445.188	1
											1894	189.4	296.571	333.461	1		1894	189.4	455.952	445.188	1
											1895	189.5	329.857	333.461	1		1895	189.5	493.619	510.138	1
											1896	189.6	311.905	333.461	1		1896	189.6	480.238	510.138	1
											1897	189.7	350.667	333.461	1		1897	189.7	534	510.138	1
											1898	189.8	331.762	333.461	1		1898	189.8	467.905	510.138	1
											1899	189.9	333.143	333.461	1		1899	189.9	435.762	510.138	1
											1900	190	297.619	333.461	1		1900	190	515.238	510.138	1
											1901	190.1	305.238	333.461	1		1901	190.1	488.524	510.138	1
											1902	190.2	335.762	333.461	1		1902	190.2	463.762	510.138	1
											1903	190.3	324.238	333.461	1		1903	190.3	432.333	510.138	1
											1904	190.4	312.952	333.461	1		1904	190.4	484.19	510.138	1
											1905	190.5	347.714	333.461	1		1905	190.5	460.619	510.138	1
											1906	190.6	292.143	333.461	1		1906	190.6	599.81	576.767	1
											1907	190.7	378.381	415.843	1		1907	190.7	591.048	576.767	1
											1908	190.8	416.619	415.843	1		1908	190.8	451.048	445.188	1
											1909	190.9	424.048	415.843	1		1909	190.9	444.048	445.188	1
											1910	191	447.857	415.843	1		1910	191	437.762	445.188	1
											1911	191.1	441.19	415.843	1		1911	191.1	426.905	445.188	1
											1912	191.2	462.571	415.843	1		1912	191.2	515.619	445.188	1
											1913	191.3	418.095	415.843	1		1913	191.3	448.476	445.188	1
											1914	191.4	460.905	415.843	1		1914	191.4	494.571	445.188	1
											1915	191.5	401.429	415.843	1		1915	191.5	421.048	445.188	1
											1916	191.6	375.143	415.843	1		1916	191.6	431.714	445.188	1
											1917	191.7	384.429	415.843	1		1917	191.7	433.762	445.188	1
											1918	191.8	396.619	415.843	1		1918	191.8	444.429	445.188	1
											1919	191.9	387.286	415.843	1		1919	191.9	462.095	445.188	1
											1920	192	393.905	415.843	1		1920	192	422.333	445.188	1
											1921	192.1	468.048	415.843	1		1921	192.1	449.19	445.188	1
											1922	192.2	414	415.843	1		1922	192.2	393.524	445.188	1
											1923	192.3	442.286	415.843	1		1923	192.3	445.095	445.188	1
											1924	192.4	434.429	415.843	1		1924	192.4	413.143	445.188	1
											1925	192.5	419.905	415.843	1		1925	192.5	409.476	445.188	1
											1926	192.6	425.048	415.843	1		1926	192.6	426.048	445.188	1
											1927	192.7	433.333	415.843	1		1927	192.7	427.714	445.188	1
											1928	192.8	428	415.843	1		1928	192.8	429.381	445.188	1
											1929	192.9	489.333	415.843	1		1929	192.9	471.81	445.188	1
											1930	193	417.905	415.843	1		1930	193	473.333	445.188	1
											1931	193.1	432.095	415.843	1		1931	193.1	473.905	445.188	1
											1932	193.2	467.762	415.843	1		1932	193.2	618.81	576.767	1
											1933	193.3	439.762	415.843	1		1933	193.3	669.762	576.767	1
											1934	193.4	456.619	415.843	1		1934	193.4	671.048	576.767	1
											1935	193.5	431.333	415.843	1		1935	193.5	703.048	576.767	1
											1936	193.6	425.952	415.843	1		1936	193.6	581.81	576.767	1
											1937	193.7	423.905	415.843	1		1937	193.7	506.952	510.138	1
											1938	193.8	431.286	415.843	1		1938	193.8	477.429	510.138	1
											1939	193.9	428.857	415.843	1		1939	193.9	523.81	510.138	1
											1940	194	420.571	415.843	1		1940	194	477.714	510.138	1
											1941	194.1	441.81	415.843	1		1941	194.1	507.619	510.138	1
											1942	194.2	379.381	415.843	1		1942	194.2	487.952	510.138	1
											1943	194.3	393.667	415.843	1		1943	194.3	571.238	510.138	1
											1944	194.4	410.048	415.843	1		1944	194.4	496.571	510.138	1
											1945	194.5	403.048	415.843	1		1945	194.5	496.524	510.138	1
											1946	194.6	445.571	415.843	1		1946	194.6	510.19	510.138	1
											1947	194.7	406.095	415.843	1		1947	194.7	538.048	510.138	1
											1948	194.8	417.571	415.843	1		1948	194.8	528.286	510.138	1
											1949	194.9	399.381	415.843	1		1949	194.9	517.143	510.138	1
											1950	195	440.333	415.843	1		1950	195	548.048	510.138	1
											1951	195.1	436.476	415.843	1		1951	195.1	482.667	510.138	1
											1952	195.2	392.571	415.843	1		1952	195.2	489.286	510.138	1
											1953	195.3	399.905	415.843	1		1953	195.3	544	510.138	1
											1954	195.4	425.143	415.843	1		1954	195.4	545.714	510.138	1
											1955	195.5	380.952	415.843	1		1955	195.5	478.19	510.138	1
											1956	195.6	401.952	415.843	1		1956	195.6	506.476	510.138	1
											1957	195.7	382.429	415.843	1		1957	195.7	512.667	510.138	1
											1958	195.8	360.381	415.843	1		1958	195.8	545.095	510.138	1
											1959	195.9	406.143	415.843	1		1959	195.9	535.762	510.138	1
											1960	196	402.333	415.843	1		1960	196	524.762	510.138	1
											1961	196.1	370.714	415.843	1		1961	196.1	553.048	510.138	1
											1962	196.2	401.286	415.843	1		1962	196.2	519.762	510.138	1
											1963	196.3	400.762	415.843	1		1963	196.3	515.048	510.138	1
											1964	196.4	394.762	415.843	1		1964	196.4	511	510.138	1
											1965	196.5	429.524	415.843	1		1965	196.5	415.905	510.138	1
											1966	196.6	405.19	415.843	1		1966	196.6	485.667	510.138	1
											1967	196.7	399.19	415.843	1		1967	196.7	493.571	510.138	1
											1968	196.8	403.286	415.843	1		1968	196.8	511.714	510.138	1
											1969	196.9	438.905	415.843	1		1969	196.9	549.19	510.138	1
											1970	197	417.143	415.843	1		1970	197	530.714	510.138	1
											1971	197.1	415.048	415.843	1		1971	197.1	519.429	510.138	1
											1972	197.2	415.714	415.843	1		1972	197.2	574.095	510.138	1
											1973	197.3	452.524	415.843	1		1973	197.3	561.81	510.138	1
											1974	197.4	424.381	415.843	1		1974	197.4	591.238	510.138	1
											1975	197.5	411.952	415.843	1		1975	197.5	517	510.138	1
											1976	197.6	402	415.843	1		1976	197.6	514	510.138	1
											1977	197.7	406.238	415.843	1		1977	197.7	580.952	510.138	1
											1978	197.8	405.619	415.843	1		1978	197.8	516.143	510.138	1
											1979	197.9	402.476	415.843	1		1979	197.9	530.81	510.138	1
											1980	198	409.048	415.843	1		1980	198	547.571	510.138	1
											1981	198.1	406.381	415.843	1		1981	198.1	544.381	510.138	1
											1982	198.2	447.524	415.843	1		1982	198.2	505.667	510.138	1
											1983	198.3	429.143	415.843	1		1983	198.3	514.905	510.138	1
											1984	198.4	430.762	415.843	1		1984	198.4	486.476	510.138	1
											1985	198.5	446.571	415.843	1		1985	198.5	521.238	510.138	1
											1986	198.6	439.571	415.843	1		1986	198.6	511.381	510.138	1
											1987	198.7	486.381	415.843	1		1987	198.7	559.381	510.138	1
											1988	198.8	447.762	415.843	1		1988	198.8	571.667	510.138	1
											1989	198.9	446	415.843	1		1989	198.9	532.238	510.138	1
											1990	199	426.048	415.843	1		1990	199	515.81	510.138	1
											1991	199.1	397.762	415.843	1		1991	199.1	507.429	510.138	1
											1992	199.2	419.619	415.843	1		1992	199.2	473.714	510.138	1
											1993	199.3	370.619	415.843	1		1993	199.3	495.857	510.138	1
											1994	199.4	420.857	415.843	1		1994	199.4	475.952	510.138	1
											1995	199.5	439.714	415.843	1		1995	199.5	511.429	510.138	1
											1996	199.6	434.524	415.843	1		1996	199.6	482.667	510.138	1
											1997	199.7	420.19	415.843	1		1997	199.7	462.81	510.138	1
											1998	199.8	380.19	415.843	1		1998	199.8	501.19	510.138	1
[truncated: 6,002 more rows]

## Sheet: Figure 5-figure supplement 4
Example Trajectory 1								Example Trajectory 2								Example Trajectory 3								Example Trajectory 4
Frame	Time (s)	Intensity (au)	DISC Fit		Number of States	BIC		Frame	Time (s)	Intensity (au)	DISC Fit		Number of States	BIC		Frame	Time (s)	Intensity (au)	DISC Fit		Number of States	BIC		Frame	Time (s)	Intensity (au)	DISC Fit		Number of States	BIC
1	0.1	749.762	837.182		1	0.937956		1	0.1	515.762	591.48		1	1		1	0.1	845.857	767.157		1	1		1	0.1	1168.57	875.045		1	1
2	0.2	865.762	837.182		2	1		2	0.2	574	591.48		2	0.906418		2	0.2	779.857	767.157		2	0.799361		2	0.2	1066.14	875.045		2	0.687934
3	0.3	787.048	837.182		3	0.176291		3	0.3	560.81	591.48		3	0.171674		3	0.3	670.619	767.157		3	0.122577		3	0.3	1127.43	875.045		3	0.670059
4	0.4	798.095	837.182		4	0		4	0.4	546.905	591.48		4	0.0333643		4	0.4	720.571	767.157		4	0.015707		4	0.4	1183.14	875.045		4	0.468491
5	0.5	970.81	837.182		5	0.0146147		5	0.5	613.286	591.48		5	0		5	0.5	826.619	767.157		5	0		5	0.5	1085.9	875.045		5	0
6	0.6	886.381	837.182					6	0.6	479.381	591.48		6	0.00790823		6	0.6	723.619	767.157		6	0.00374916		6	0.6	1027.86	875.045		6	0.0134416
7	0.7	789.571	837.182					7	0.7	616.571	591.48		7	0.0204201		7	0.7	688.19	767.157		7	0.00484762		7	0.7	886.714	875.045		7	0.0444866
8	0.8	683.667	703.47					8	0.8	585.667	591.48		8	0.0333654		8	0.8	720.095	767.157		8	0.0116106		8	0.8	859.667	875.045		8	0.0580033
9	0.9	727.524	703.47					9	0.9	567.667	591.48					9	0.9	786	767.157		9	0.019803		9	0.9	904.762	875.045		9	0.0188493
10	1	759.238	703.47					10	1	537.714	591.48					10	1	770.667	767.157					10	1	890.238	875.045		10	0.0517529
11	1.1	751.857	703.47					11	1.1	599	591.48					11	1.1	779.095	767.157					11	1.1	993.19	875.045
12	1.2	683.762	703.47					12	1.2	599.524	591.48					12	1.2	762.429	767.157					12	1.2	954.81	875.045
13	1.3	665.952	703.47					13	1.3	605.476	591.48					13	1.3	732.952	767.157					13	1.3	956.381	875.045
14	1.4	700.762	703.47					14	1.4	571.81	591.48					14	1.4	737.286	767.157					14	1.4	946.667	875.045
15	1.5	692.333	703.47					15	1.5	529.476	591.48					15	1.5	707.81	657.245					15	1.5	1011.57	875.045
16	1.6	735.381	703.47					16	1.6	509	591.48					16	1.6	711.333	657.245					16	1.6	925.381	875.045
17	1.7	638.714	703.47					17	1.7	618.857	591.48					17	1.7	677.048	657.245					17	1.7	916.143	875.045
18	1.8	752	703.47					18	1.8	549.476	591.48					18	1.8	650.143	657.245					18	1.8	964.381	875.045
19	1.9	633.238	703.47					19	1.9	569	591.48					19	1.9	673.952	657.245					19	1.9	981.762	875.045
20	2	677.238	703.47					20	2	521.571	504.122					20	2	683.048	657.245					20	2	938.381	875.045
21	2.1	778.81	703.47					21	2.1	497.952	504.122					21	2.1	685.952	657.245					21	2.1	1009.62	875.045
22	2.2	790.19	703.47					22	2.2	536.714	504.122					22	2.2	655.333	657.245					22	2.2	918	875.045
23	2.3	801.048	703.47					23	2.3	516.81	504.122					23	2.3	708.286	657.245					23	2.3	969.429	875.045
24	2.4	806.381	703.47					24	2.4	593.619	504.122					24	2.4	725.143	657.245					24	2.4	970.762	875.045
25	2.5	715.095	703.47					25	2.5	509	504.122					25	2.5	703.429	657.245					25	2.5	1003.33	875.045
26	2.6	731.429	703.47					26	2.6	562.238	504.122					26	2.6	667.095	657.245					26	2.6	988.952	875.045
27	2.7	742.905	703.47					27	2.7	574.095	504.122					27	2.7	655.762	657.245					27	2.7	938.143	875.045
28	2.8	838.905	703.47					28	2.8	521.714	504.122					28	2.8	727.524	657.245					28	2.8	1010.29	875.045
29	2.9	625.81	703.47					29	2.9	521.429	504.122					29	2.9	702.571	657.245					29	2.9	810.81	875.045
30	3	683.667	703.47					30	3	502.762	504.122					30	3	719.095	657.245					30	3	969.429	875.045
31	3.1	775.476	703.47					31	3.1	460.476	504.122					31	3.1	718.81	657.245					31	3.1	988.286	875.045
32	3.2	839	703.47					32	3.2	506.429	504.122					32	3.2	721.952	657.245					32	3.2	1019.33	875.045
33	3.3	783.714	703.47					33	3.3	519.143	504.122					33	3.3	636.333	657.245					33	3.3	961.476	875.045
34	3.4	772.095	703.47					34	3.4	528.905	504.122					34	3.4	783.905	892.439					34	3.4	1013.1	875.045
35	3.5	723.619	703.47					35	3.5	522.524	504.122					35	3.5	859.667	892.439					35	3.5	930.143	875.045
36	3.6	686.857	703.47					36	3.6	554.762	591.48					36	3.6	939.19	892.439					36	3.6	829.905	875.045
37	3.7	883.048	837.182					37	3.7	584.333	591.48					37	3.7	802.619	892.439					37	3.7	819.571	875.045
38	3.8	842.429	837.182					38	3.8	572.048	591.48					38	3.8	784.286	892.439					38	3.8	800.952	875.045
39	3.9	806.19	837.182					39	3.9	602.238	591.48					39	3.9	868.429	892.439					39	3.9	817.048	875.045
40	4	863.286	837.182					40	4	614.429	591.48					40	4	776.714	892.439					40	4	867.81	875.045
41	4.1	786.476	837.182					41	4.1	628.143	591.48					41	4.1	829.143	892.439					41	4.1	843.143	875.045
42	4.2	823.619	837.182					42	4.2	615.238	591.48					42	4.2	835.143	892.439					42	4.2	833.81	875.045
43	4.3	802.143	837.182					43	4.3	604.286	591.48					43	4.3	782.095	892.439					43	4.3	851.857	875.045
44	4.4	849.81	837.182					44	4.4	580.143	591.48					44	4.4	827.952	892.439					44	4.4	858.905	875.045
45	4.5	885.381	837.182					45	4.5	614.952	591.48					45	4.5	879.762	892.439					45	4.5	933.048	875.045
46	4.6	877.333	837.182					46	4.6	603.905	591.48					46	4.6	798.905	892.439					46	4.6	899.619	875.045
47	4.7	794.143	837.182					47	4.7	618.143	591.48					47	4.7	913.619	892.439					47	4.7	881.667	875.045
48	4.8	844.524	837.182					48	4.8	611.19	591.48					48	4.8	817.381	892.439					48	4.8	888.714	875.045
49	4.9	814.476	837.182					49	4.9	580.19	591.48					49	4.9	838	892.439					49	4.9	866.571	875.045
50	5	809.667	837.182					50	5	644.667	591.48					50	5	784.762	892.439					50	5	861	875.045
51	5.1	854.952	837.182					51	5.1	575.667	591.48					51	5.1	771.333	892.439					51	5.1	780.429	728.573
52	5.2	749.19	837.182					52	5.2	604.524	591.48					52	5.2	941.762	892.439					52	5.2	769.524	728.573
53	5.3	852.952	837.182					53	5.3	614.333	591.48					53	5.3	871.429	892.439					53	5.3	724.381	728.573
54	5.4	854.714	837.182					54	5.4	610.333	591.48					54	5.4	880.19	892.439					54	5.4	737.286	728.573
55	5.5	835.095	837.182					55	5.5	625	591.48					55	5.5	848.333	892.439					55	5.5	804.429	728.573
56	5.6	823.286	837.182					56	5.6	589.619	591.48					56	5.6	822.571	892.439					56	5.6	749.571	728.573
57	5.7	845.857	837.182					57	5.7	541.571	591.48					57	5.7	848.905	892.439					57	5.7	852.048	728.573
58	5.8	810.714	837.182					58	5.8	606.476	591.48					58	5.8	819.238	767.157					58	5.8	785.381	728.573
59	5.9	843.286	837.182					59	5.9	623.429	591.48					59	5.9	821.524	767.157					59	5.9	844.667	728.573
60	6	824.381	837.182					60	6	626	591.48					60	6	818.857	767.157					60	6	779.333	728.573
61	6.1	877.476	837.182					61	6.1	574.667	591.48					61	6.1	782.286	767.157					61	6.1	859.905	728.573
62	6.2	965.667	837.182					62	6.2	544.143	591.48					62	6.2	772.667	767.157					62	6.2	716.524	728.573
63	6.3	915.524	837.182					63	6.3	557.762	591.48					63	6.3	810	767.157					63	6.3	582.143	615.657
64	6.4	906.667	837.182					64	6.4	521.524	504.122					64	6.4	845.667	767.157					64	6.4	596.429	615.657
65	6.5	874	837.182					65	6.5	491.714	504.122					65	6.5	782.571	767.157					65	6.5	592.952	615.657
66	6.6	777.667	837.182					66	6.6	504.429	504.122					66	6.6	898.238	892.439					66	6.6	591.19	615.657
67	6.7	817.381	837.182					67	6.7	487.619	504.122					67	6.7	843.857	892.439					67	6.7	580.571	615.657
68	6.8	860.048	837.182					68	6.8	507.952	504.122					68	6.8	845.524	892.439					68	6.8	625.429	615.657
69	6.9	816.381	837.182					69	6.9	490.19	504.122					69	6.9	854.333	892.439					69	6.9	574.524	615.657
70	7	777.714	837.182					70	7	534.19	504.122					70	7	886.286	892.439					70	7	595.429	615.657
71	7.1	817.952	837.182					71	7.1	593.571	504.122					71	7.1	769.619	767.157					71	7.1	604.143	615.657
72	7.2	831.905	837.182					72	7.2	497.619	504.122					72	7.2	762.143	767.157					72	7.2	658.095	615.657
73	7.3	839	837.182					73	7.3	549.048	504.122					73	7.3	759.619	767.157					73	7.3	615.381	615.657
74	7.4	834.048	837.182					74	7.4	578.048	504.122					74	7.4	738.714	767.157					74	7.4	634.714	615.657
75	7.5	790.762	837.182					75	7.5	511.286	504.122					75	7.5	803.952	767.157					75	7.5	593.762	615.657
76	7.6	822.286	837.182					76	7.6	409.238	431.117					76	7.6	857.286	767.157					76	7.6	613.667	615.657
77	7.7	827.381	837.182					77	7.7	402.476	431.117					77	7.7	777.571	767.157					77	7.7	690.095	728.573
78	7.8	836.619	837.182					78	7.8	527.429	504.122					78	7.8	781.857	767.157					78	7.8	669.429	728.573
79	7.9	804.857	837.182					79	7.9	490.095	504.122					79	7.9	864.81	767.157					79	7.9	682.143	728.573
80	8	864.714	837.182					80	8	450.19	504.122					80	8	828.952	767.157					80	8	706.81	728.573
81	8.1	737.667	837.182					81	8.1	506.762	504.122					81	8.1	832.524	767.157					81	8.1	698.952	728.573
82	8.2	792.286	837.182					82	8.2	516.381	504.122					82	8.2	758.619	767.157					82	8.2	676.048	728.573
83	8.3	740.429	837.182					83	8.3	458.905	431.117					83	8.3	879.524	767.157					83	8.3	716.476	728.573
84	8.4	924.095	837.182					84	8.4	428.571	431.117					84	8.4	819.762	767.157					84	8.4	659.429	728.573
85	8.5	742.19	837.182					85	8.5	412.143	431.117					85	8.5	844.143	767.157					85	8.5	675.286	728.573
86	8.6	857.571	837.182					86	8.6	426.333	431.117					86	8.6	754.333	767.157					86	8.6	637.571	728.573
87	8.7	885.667	837.182					87	8.7	450.762	431.117					87	8.7	768.667	767.157					87	8.7	649.619	728.573
88	8.8	854	837.182					88	8.8	436.143	431.117					88	8.8	832.476	767.157					88	8.8	695.857	728.573
89	8.9	795.143	837.182					89	8.9	408.571	431.117					89	8.9	823.143	767.157					89	8.9	703.19	728.573
90	9	696.905	703.47					90	9	446.667	431.117					90	9	760.048	767.157					90	9	742.619	728.573
91	9.1	641.857	703.47					91	9.1	364.81	431.117					91	9.1	792.905	767.157					91	9.1	707.143	728.573
92	9.2	680.429	703.47					92	9.2	433.571	431.117					92	9.2	827.667	767.157					92	9.2	739.857	728.573
93	9.3	695.381	703.47					93	9.3	417.333	431.117					93	9.3	746.905	767.157					93	9.3	767.429	728.573
94	9.4	676.667	703.47					94	9.4	424.952	431.117					94	9.4	762.238	767.157					94	9.4	694.476	728.573
95	9.5	759.81	703.47					95	9.5	522.429	431.117					95	9.5	775.81	767.157					95	9.5	720.762	728.573
96	9.6	718.714	703.47					96	9.6	452.667	431.117					96	9.6	767.333	767.157					96	9.6	722.952	728.573
97	9.7	729.333	703.47					97	9.7	417.857	431.117					97	9.7	760.762	767.157					97	9.7	737.143	728.573
98	9.8	691.952	703.47					98	9.8	458.048	431.117					98	9.8	731.143	767.157					98	9.8	696.667	728.573
99	9.9	633.19	703.47					99	9.9	446.333	431.117					99	9.9	882	767.157					99	9.9	769.381	728.573
100	10	724.19	703.47					100	10	404.429	431.117					100	10	796.905	767.157					100	10	739.714	728.573
101	10.1	701.333	703.47					101	10.1	416	431.117					101	10.1	860.381	767.157					101	10.1	698.524	728.573
102	10.2	660.857	703.47					102	10.2	413.524	431.117					102	10.2	745.81	767.157					102	10.2	771.524	728.573
103	10.3	676.857	703.47					103	10.3	387.571	431.117					103	10.3	805.619	767.157					103	10.3	712.095	728.573
104	10.4	709.476	703.47					104	10.4	386.667	431.117					104	10.4	765.81	767.157					104	10.4	723.19	728.573
105	10.5	667.714	703.47					105	10.5	436.476	431.117					105	10.5	762.381	767.157					105	10.5	714.667	728.573
106	10.6	692.905	703.47					106	10.6	422.667	431.117					106	10.6	725.905	767.157					106	10.6	749.333	728.573
107	10.7	709	703.47					107	10.7	427.524	431.117					107	10.7	734.286	767.157					107	10.7	701.762	728.573
108	10.8	665.952	703.47					108	10.8	417.524	431.117					108	10.8	717.19	767.157					108	10.8	665.095	728.573
109	10.9	687.476	703.47					109	10.9	424.905	431.117					109	10.9	733.048	767.157					109	10.9	713.333	728.573
110	11	691.905	703.47					110	11	438.476	431.117					110	11	716.667	767.157					110	11	740.714	728.573
111	11.1	663.952	703.47					111	11.1	435.714	431.117					111	11.1	765.619	767.157					111	11.1	826.667	728.573
112	11.2	678.714	703.47					112	11.2	442.095	431.117					112	11.2	777.238	767.157					112	11.2	835.571	728.573
113	11.3	710.238	703.47					113	11.3	383.095	431.117					113	11.3	775.952	767.157					113	11.3	873.19	728.573
114	11.4	643.714	703.47					114	11.4	370.524	431.117					114	11.4	741.381	767.157					114	11.4	796.333	728.573
115	11.5	693.762	703.47					115	11.5	424.143	431.117					115	11.5	866.952	892.439					115	11.5	838.143	728.573
116	11.6	712.524	703.47					116	11.6	498.667	431.117					116	11.6	815.905	892.439					116	11.6	762.429	728.573
117	11.7	702.857	703.47					117	11.7	462.429	431.117					117	11.7	878.524	892.439					117	11.7	740.143	728.573
118	11.8	739.048	703.47					118	11.8	456.333	431.117					118	11.8	944.286	892.439					118	11.8	624.095	728.573
119	11.9	650.762	703.47					119	11.9	499.381	431.117					119	11.9	917.524	892.439					119	11.9	638.238	728.573
120	12	677.905	703.47					120	12	444.238	431.117					120	12	931.619	892.439					120	12	687.619	728.573
121	12.1	713.524	703.47					121	12.1	472	431.117					121	12.1	946.429	892.439					121	12.1	713	728.573
122	12.2	667.238	703.47					122	12.2	419.905	431.117					122	12.2	918.524	892.439					122	12.2	689.905	728.573
123	12.3	695.667	703.47					123	12.3	465.857	431.117					123	12.3	825.238	767.157					123	12.3	698.333	728.573
124	12.4	698.143	703.47					124	12.4	440.381	431.117					124	12.4	828.476	767.157					124	12.4	700.476	728.573
125	12.5	655.952	703.47					125	12.5	432.095	431.117					125	12.5	779.048	767.157					125	12.5	685.286	728.573
126	12.6	654.762	703.47					126	12.6	444.762	431.117					126	12.6	755.333	767.157					126	12.6	745.762	728.573
127	12.7	619.762	703.47					127	12.7	506.238	504.122					127	12.7	820.762	767.157					127	12.7	789.143	728.573
128	12.8	670.952	703.47					128	12.8	482.714	504.122					128	12.8	771.286	767.157					128	12.8	827.952	728.573
129	12.9	647.952	703.47					129	12.9	495.667	504.122					129	12.9	759.524	767.157					129	12.9	748.095	728.573
130	13	660.857	703.47					130	13	574.619	591.48					130	13	792.714	767.157					130	13	790	728.573
131	13.1	656.048	703.47					131	13.1	620.333	591.48					131	13.1	749.667	767.157					131	13.1	819.714	728.573
132	13.2	688.476	703.47					132	13.2	604.571	591.48					132	13.2	831.667	767.157					132	13.2	741.81	728.573
133	13.3	626.476	703.47					133	13.3	578.095	591.48					133	13.3	768.143	767.157					133	13.3	705.571	728.573
134	13.4	639.238	703.47					134	13.4	553.143	591.48					134	13.4	826.381	767.157					134	13.4	677.476	728.573
135	13.5	674.143	703.47					135	13.5	584.429	591.48					135	13.5	762.619	767.157					135	13.5	592.524	615.657
136	13.6	560.667	555.037					136	13.6	498.143	504.122					136	13.6	756.333	767.157					136	13.6	640.429	615.657
137	13.7	564.095	555.037					137	13.7	564.19	504.122					137	13.7	729.952	767.157					137	13.7	635.524	615.657
138	13.8	519.667	555.037					138	13.8	555.19	504.122					138	13.8	763	767.157					138	13.8	571.286	615.657
139	13.9	511.857	555.037					139	13.9	525.095	504.122					139	13.9	779.048	767.157					139	13.9	645.762	615.657
140	14	566.762	555.037					140	14	494.19	504.122					140	14	809.81	767.157					140	14	612.238	615.657
141	14.1	527.81	555.037					141	14.1	459.238	431.117					141	14.1	798.095	767.157					141	14.1	639.524	615.657
142	14.2	533.905	555.037					142	14.2	420.571	431.117					142	14.2	778.762	767.157					142	14.2	597.048	615.657
143	14.3	490.476	555.037					143	14.3	412.381	431.117					143	14.3	773.429	767.157					143	14.3	621.762	615.657
144	14.4	559.571	555.037					144	14.4	442.905	431.117					144	14.4	739.381	767.157					144	14.4	719.429	728.573
145	14.5	552.667	555.037					145	14.5	453.286	431.117					145	14.5	761.429	767.157					145	14.5	629.238	728.573
146	14.6	552.286	555.037					146	14.6	452.524	431.117					146	14.6	739.048	767.157					146	14.6	728.143	728.573
147	14.7	551.619	555.037					147	14.7	422.667	431.117					147	14.7	776.429	767.157					147	14.7	729.952	728.573
148	14.8	541.095	555.037					148	14.8	410.952	431.117					148	14.8	874.952	892.439					148	14.8	758.286	728.573
149	14.9	586.381	555.037					149	14.9	412.524	431.117					149	14.9	983.476	892.439					149	14.9	736.333	728.573
150	15	561.619	555.037					150	15	415.571	431.117					150	15	986.571	892.439					150	15	709.476	728.573
151	15.1	687.048	703.47					151	15.1	430.048	431.117					151	15.1	952.524	892.439					151	15.1	757.476	728.573
152	15.2	724	703.47					152	15.2	438.048	431.117					152	15.2	955.381	892.439					152	15.2	770.286	728.573
153	15.3	578.429	555.037					153	15.3	445.667	431.117					153	15.3	996.667	892.439					153	15.3	686.571	728.573
154	15.4	538.762	555.037					154	15.4	469.143	504.122					154	15.4	880.429	892.439					154	15.4	672.476	728.573
155	15.5	542.238	555.037					155	15.5	527.143	504.122					155	15.5	973.667	892.439					155	15.5	773.81	728.573
156	15.6	550.524	555.037					156	15.6	505.667	504.122					156	15.6	1038.71	892.439					156	15.6	668.143	728.573
157	15.7	500.857	555.037					157	15.7	489.429	504.122					157	15.7	924.905	892.439					157	15.7	645.19	615.657
158	15.8	540.19	555.037					158	15.8	503.667	504.122					158	15.8	1057.29	892.439					158	15.8	642.476	615.657
159	15.9	544.714	555.037					159	15.9	514.952	504.122					159	15.9	991.857	892.439					159	15.9	619.095	615.657
160	16	527.238	555.037					160	16	457.952	504.122					160	16	1028.29	892.439					160	16	622.952	615.657
161	16.1	524.619	555.037					161	16.1	525.143	504.122					161	16.1	910.19	892.439					161	16.1	624.762	615.657
162	16.2	501.524	555.037					162	16.2	445.714	504.122					162	16.2	964.857	892.439					162	16.2	638.81	615.657
163	16.3	575.667	555.037					163	16.3	471.333	504.122					163	16.3	973.095	892.439					163	16.3	616.429	615.657
164	16.4	504.762	555.037					164	16.4	460.095	504.122					164	16.4	1011.62	892.439					164	16.4	626.048	615.657
165	16.5	403.333	408.832					165	16.5	455.905	504.122					165	16.5	928.476	892.439					165	16.5	604.952	615.657
166	16.6	537.095	555.037					166	16.6	454.81	504.122					166	16.6	946.714	892.439					166	16.6	631.476	615.657
167	16.7	516.143	555.037					167	16.7	482.095	504.122					167	16.7	915.905	892.439					167	16.7	617.238	615.657
168	16.8	550.571	555.037					168	16.8	471.429	504.122					168	16.8	915.81	892.439					168	16.8	629.857	615.657
169	16.9	537.286	555.037					169	16.9	497.857	504.122					169	16.9	749.286	767.157					169	16.9	545.81	615.657
170	17	443.143	555.037					170	17	472.81	504.122					170	17	866.857	767.157					170	17	600.238	615.657
171	17.1	524.619	555.037					171	17.1	499.333	504.122					171	17.1	775.048	767.157					171	17.1	671.19	728.573
172	17.2	547.238	555.037					172	17.2	441.857	504.122					172	17.2	763.905	767.157					172	17.2	715.19	728.573
173	17.3	572.381	555.037					173	17.3	472.476	504.122					173	17.3	760.476	767.157					173	17.3	652.667	728.573
174	17.4	523.095	555.037					174	17.4	484.81	504.122					174	17.4	743.048	767.157					174	17.4	743.952	728.573
175	17.5	510.524	555.037					175	17.5	527.286	504.122					175	17.5	759.857	767.157					175	17.5	726.905	728.573
176	17.6	571.667	555.037					176	17.6	549.095	504.122					176	17.6	679.952	657.245					176	17.6	768.905	728.573
177	17.7	515.333	555.037					177	17.7	512.524	504.122					177	17.7	592.619	657.245					177	17.7	767.19	728.573
178	17.8	509.048	555.037					178	17.8	578.524	504.122					178	17.8	643.095	657.245					178	17.8	727.095	728.573
179	17.9	510.429	555.037					179	17.9	595.143	504.122					179	17.9	624.238	657.245					179	17.9	720.476	728.573
180	18	478.143	555.037					180	18	497.952	504.122					180	18	655.571	657.245					180	18	706.952	728.573
181	18.1	560	555.037					181	18.1	522.095	504.122					181	18.1	643	657.245					181	18.1	728.238	728.573
182	18.2	496.095	555.037					182	18.2	499.238	504.122					182	18.2	592.952	657.245					182	18.2	658.952	728.573
183	18.3	531.81	555.037					183	18.3	452.048	504.122					183	18.3	690.524	657.245					183	18.3	674.905	728.573
184	18.4	523.476	555.037					184	18.4	472.19	504.122					184	18.4	652.857	657.245					184	18.4	714.571	728.573
185	18.5	535.143	555.037					185	18.5	474.286	504.122					185	18.5	664.857	657.245					185	18.5	738.238	728.573
186	18.6	515.238	555.037					186	18.6	560	504.122					186	18.6	607.429	657.245					186	18.6	704.952	728.573
187	18.7	612.381	555.037					187	18.7	552.524	504.122					187	18.7	641.143	657.245					187	18.7	752.476	728.573
188	18.8	543.19	555.037					188	18.8	524.048	504.122					188	18.8	626.762	657.245					188	18.8	720.905	728.573
189	18.9	522	555.037					189	18.9	517.095	504.122					189	18.9	589.81	657.245					189	18.9	684.095	728.573
190	19	543	555.037					190	19	570	591.48					190	19	640.333	657.245					190	19	782.524	728.573
191	19.1	501.667	555.037					191	19.1	541.333	591.48					191	19.1	652.095	657.245					191	19.1	753.476	728.573
192	19.2	533.619	555.037					192	19.2	573.048	591.48					192	19.2	604.19	657.245					192	19.2	719.81	728.573
193	19.3	530.333	555.037					193	19.3	552.238	591.48					193	19.3	633.762	657.245					193	19.3	713.286	728.573
194	19.4	533.143	555.037					194	19.4	556.429	591.48					194	19.4	618.952	657.245					194	19.4	677.81	728.573
195	19.5	501.952	555.037					195	19.5	532.952	591.48					195	19.5	655.81	657.245					195	19.5	737.857	728.573
196	19.6	566.714	555.037					196	19.6	527	591.48					196	19.6	632.714	657.245					196	19.6	708.571	728.573
197	19.7	566.333	555.037					197	19.7	552.19	591.48					197	19.7	594.095	657.245					197	19.7	739.952	728.573
198	19.8	523.286	555.037					198	19.8	593.81	591.48					198	19.8	676.143	657.245					198	19.8	661.571	728.573
199	19.9	550.857	555.037					199	19.9	602.857	591.48					199	19.9	644.857	657.245					199	19.9	666.286	728.573
200	20	533.429	555.037					200	20	566.524	591.48					200	20	604.19	657.245					200	20	677.571	728.573
201	20.1	691.19	703.47					201	20.1	620.381	591.48					201	20.1	649.952	657.245					201	20.1	701	728.573
202	20.2	678.81	703.47					202	20.2	611.095	591.48					202	20.2	588.857	657.245					202	20.2	679.095	728.573
203	20.3	720.286	703.47					203	20.3	601.048	591.48					203	20.3	580.381	657.245					203	20.3	661.571	728.573
204	20.4	683.667	703.47					204	20.4	597.476	591.48					204	20.4	662.667	657.245					204	20.4	736.381	728.573
205	20.5	706.905	703.47					205	20.5	583.762	591.48					205	20.5	643	657.245					205	20.5	724.905	728.573
206	20.6	642.381	703.47					206	20.6	567.476	591.48					206	20.6	611	657.245					206	20.6	637.19	728.573
207	20.7	663.238	703.47					207	20.7	626.286	591.48					207	20.7	686.762	657.245					207	20.7	636.952	728.573
208	20.8	579.952	555.037					208	20.8	578.619	591.48					208	20.8	579.476	657.245					208	20.8	737.333	728.573
209	20.9	521.048	555.037					209	20.9	547.905	591.48					209	20.9	600.524	657.245					209	20.9	750.333	728.573
210	21	509.905	555.037					210	21	631.762	591.48					210	21	608.667	657.245					210	21	717.905	728.573
211	21.1	518.905	555.037					211	21.1	574.619	591.48					211	21.1	609.333	657.245					211	21.1	745.905	728.573
212	21.2	479.571	555.037					212	21.2	585.714	591.48					212	21.2	633.762	657.245					212	21.2	706.143	728.573
213	21.3	517.19	555.037					213	21.3	562.476	591.48					213	21.3	663.619	657.245					213	21.3	755.762	728.573
214	21.4	500.238	555.037					214	21.4	619.238	591.48					214	21.4	625.571	657.245					214	21.4	758	728.573
215	21.5	522	555.037					215	21.5	590.381	591.48					215	21.5	443.143	447.884					215	21.5	770.619	728.573
216	21.6	542.81	555.037					216	21.6	586.476	591.48					216	21.6	487.429	447.884					216	21.6	741.667	728.573
217	21.7	502.429	555.037					217	21.7	539.952	591.48					217	21.7	528.381	447.884					217	21.7	751.048	728.573
218	21.8	557.095	555.037					218	21.8	576.857	591.48					218	21.8	467.714	447.884					218	21.8	755.571	728.573
219	21.9	524.333	555.037					219	21.9	585.476	591.48					219	21.9	485.905	447.884					219	21.9	764.429	728.573
220	22	534.381	555.037					220	22	542.571	591.48					220	22	480.286	447.884					220	22	746.571	728.573
221	22.1	558.762	555.037					221	22.1	551.429	591.48					221	22.1	463.952	447.884					221	22.1	861.286	875.045
222	22.2	529.381	555.037					222	22.2	548	591.48					222	22.2	486.714	447.884					222	22.2	840.524	875.045
223	22.3	538.048	555.037					223	22.3	596.714	591.48					223	22.3	470.286	447.884					223	22.3	852.095	875.045
224	22.4	523	555.037					224	22.4	594.762	591.48					224	22.4	433.524	447.884					224	22.4	878.429	875.045
225	22.5	517.762	555.037					225	22.5	609.238	591.48					225	22.5	497.429	447.884					225	22.5	829	875.045
226	22.6	523.524	555.037					226	22.6	548.476	591.48					226	22.6	475.524	447.884					226	22.6	816.095	875.045
227	22.7	462.619	408.832					227	22.7	598.238	591.48					227	22.7	476.571	447.884					227	22.7	846.381	875.045
228	22.8	438.762	408.832					228	22.8	604.381	591.48					228	22.8	524.524	561.395					228	22.8	825.952	875.045
229	22.9	396.381	408.832					229	22.9	603.238	591.48					229	22.9	550.667	561.395					229	22.9	855.952	875.045
230	23	448.714	408.832					230	23	615	591.48					230	23	469.143	561.395					230	23	830.857	875.045
231	23.1	396.476	408.832					231	23.1	593.286	591.48					231	23.1	486.429	561.395					231	23.1	875.667	875.045
232	23.2	406.952	408.832					232	23.2	549.048	591.48					232	23.2	524.905	561.395					232	23.2	783.762	728.573
233	23.3	391.905	408.832					233	23.3	537.429	591.48					233	23.3	587.81	561.395					233	23.3	706	728.573
234	23.4	402.952	408.832					234	23.4	511.952	591.48					234	23.4	473.714	561.395					234	23.4	689.857	728.573
235	23.5	396.952	408.832					235	23.5	515.905	591.48					235	23.5	497.095	561.395					235	23.5	736.238	728.573
236	23.6	416.571	408.832					236	23.6	550.333	591.48					236	23.6	493.143	561.395					236	23.6	626.619	615.657
237	23.7	417.381	408.832					237	23.7	553.143	591.48					237	23.7	485.762	561.395					237	23.7	645.333	615.657
238	23.8	436.667	408.832					238	23.8	563.762	591.48					238	23.8	511.286	561.395					238	23.8	626.429	615.657
239	23.9	372.81	408.832					239	23.9	626.476	591.48					239	23.9	482.762	561.395					239	23.9	652.905	615.657
240	24	403	408.832					240	24	622.524	591.48					240	24	449.524	561.395					240	24	624.857	615.657
241	24.1	477.571	555.037					241	24.1	556.619	591.48					241	24.1	494	561.395					241	24.1	628	615.657
242	24.2	504.714	555.037					242	24.2	601.333	591.48					242	24.2	527.048	561.395					242	24.2	643.571	615.657
243	24.3	565.333	555.037					243	24.3	586.667	591.48					243	24.3	500.476	561.395					243	24.3	630.333	615.657
244	24.4	510.952	555.037					244	24.4	636.571	591.48					244	24.4	481.286	447.884					244	24.4	695.429	615.657
245	24.5	522.333	555.037					245	24.5	606.524	591.48					245	24.5	448.857	447.884					245	24.5	670.095	615.657
246	24.6	596.905	555.037					246	24.6	569.524	591.48					246	24.6	456.571	447.884					246	24.6	661.952	615.657
247	24.7	663.476	703.47					247	24.7	570.667	591.48					247	24.7	476.81	447.884					247	24.7	608.286	615.657
248	24.8	678.81	703.47					248	24.8	613	591.48					248	24.8	494.476	447.884					248	24.8	681.857	728.573
249	24.9	645.952	703.47					249	24.9	579.905	591.48					249	24.9	454.048	447.884					249	24.9	713.286	728.573
250	25	659.571	703.47					250	25	558.048	591.48					250	25	442.286	447.884					250	25	718.81	728.573
251	25.1	684.19	703.47					251	25.1	503.81	591.48					251	25.1	472.143	447.884					251	25.1	659.667	728.573
252	25.2	710.286	703.47					252	25.2	596.333	591.48					252	25.2	482.905	447.884					252	25.2	697	728.573
253	25.3	671.333	703.47					253	25.3	630.238	591.48					253	25.3	433.048	447.884					253	25.3	689	728.573
254	25.4	686.857	703.47					254	25.4	671.143	591.48					254	25.4	475.667	447.884					254	25.4	668.143	728.573
255	25.5	707.714	703.47					255	25.5	540.095	591.48					255	25.5	496.381	447.884					255	25.5	730.81	728.573
256	25.6	690.238	703.47					256	25.6	546.238	591.48					256	25.6	469.619	447.884					256	25.6	760.81	728.573
257	25.7	691.429	703.47					257	25.7	571.905	591.48					257	25.7	482.143	447.884					257	25.7	766.381	728.573
258	25.8	572.429	555.037					258	25.8	549.905	591.48					258	25.8	494.429	447.884					258	25.8	764.095	728.573
259	25.9	560.762	555.037					259	25.9	557.81	591.48					259	25.9	460.476	447.884					259	25.9	696.952	728.573
260	26	594.857	555.037					260	26	524.762	591.48					260	26	447.905	447.884					260	26	750.429	728.573
261	26.1	577	555.037					261	26.1	563.333	591.48					261	26.1	468.81	447.884					261	26.1	826.857	875.045
262	26.2	587.095	555.037					262	26.2	514.571	591.48					262	26.2	478.952	447.884					262	26.2	965	875.045
263	26.3	524.762	555.037					263	26.3	590.667	591.48					263	26.3	447.381	447.884					263	26.3	892.714	875.045
264	26.4	604.143	555.037					264	26.4	530.714	591.48					264	26.4	512.952	447.884					264	26.4	798.19	875.045
265	26.5	524.619	555.037					265	26.5	545.143	591.48					265	26.5	484.286	447.884					265	26.5	858.619	875.045
266	26.6	579	555.037					266	26.6	593.381	591.48					266	26.6	418.286	447.884					266	26.6	809.571	875.045
267	26.7	628.19	555.037					267	26.7	533.905	591.48					267	26.7	456.571	447.884					267	26.7	853.048	875.045
268	26.8	515.952	555.037					268	26.8	599.762	591.48					268	26.8	428.095	447.884					268	26.8	769.667	728.573
269	26.9	565.81	555.037					269	26.9	558.476	591.48					269	26.9	477.476	447.884					269	26.9	760.286	728.573
270	27	535.524	555.037					270	27	547.333	591.48					270	27	491	447.884					270	27	765.476	728.573
271	27.1	444.143	408.832					271	27.1	553.905	591.48					271	27.1	479.286	447.884					271	27.1	778.667	728.573
272	27.2	412	408.832					272	27.2	545.381	591.48					272	27.2	497.238	447.884					272	27.2	772.762	728.573
273	27.3	412.81	408.832					273	27.3	545.19	591.48					273	27.3	448.095	447.884					273	27.3	769.714	728.573
274	27.4	397.143	408.832					274	27.4	582.571	591.48					274	27.4	467.762	447.884					274	27.4	767.762	728.573
275	27.5	381.762	408.832					275	27.5	591.857	591.48					275	27.5	496.952	447.884					275	27.5	747.524	728.573
276	27.6	374.286	408.832					276	27.6	612.81	591.48					276	27.6	450.19	447.884					276	27.6	746.619	728.573
277	27.7	407.143	408.832					277	27.7	563.905	591.48					277	27.7	470.619	447.884					277	27.7	747.429	728.573
278	27.8	521.333	555.037					278	27.8	530.81	591.48					278	27.8	488.952	447.884					278	27.8	794.095	728.573
279	27.9	577.048	555.037					279	27.9	615.238	591.48					279	27.9	487.143	447.884					279	27.9	699.476	728.573
280	28	567.857	555.037					280	28	610.952	591.48					280	28	462.857	447.884					280	28	735.048	728.573
281	28.1	562	555.037					281	28.1	586.667	591.48					281	28.1	546.905	561.395					281	28.1	752.238	728.573
282	28.2	530.143	555.037					282	28.2	542.571	591.48					282	28.2	519.19	561.395					282	28.2	616.714	728.573
283	28.3	609.286	555.037					283	28.3	540.524	591.48					283	28.3	660.762	657.245					283	28.3	655.381	728.573
284	28.4	704.143	703.47					284	28.4	549.81	591.48					284	28.4	622.381	657.245					284	28.4	739.476	728.573
285	28.5	694.143	703.47					285	28.5	595.524	591.48					285	28.5	587.048	657.245					285	28.5	668	728.573
286	28.6	719.286	703.47					286	28.6	474.667	591.48					286	28.6	607.476	657.245					286	28.6	694.857	728.573
287	28.7	608.857	703.47					287	28.7	553.857	591.48					287	28.7	560.905	657.245					287	28.7	725.667	728.573
288	28.8	674.143	703.47					288	28.8	609.714	591.48					288	28.8	611.762	657.245					288	28.8	681.095	728.573
289	28.9	634.619	703.47					289	28.9	599.905	591.48					289	28.9	636.048	657.245					289	28.9	654	615.657
290	29	688.524	703.47					290	29	571.667	591.48					290	29	626.81	657.245					290	29	666.429	615.657
291	29.1	795.286	703.47					291	29.1	488.381	591.48					291	29.1	601.19	657.245					291	29.1	631.095	615.657
292	29.2	721.381	703.47					292	29.2	537.571	591.48					292	29.2	655.762	657.245					292	29.2	555.714	615.657
293	29.3	679.095	703.47					293	29.3	582.429	591.48					293	29.3	635.714	657.245					293	29.3	588.857	615.657
294	29.4	685.714	703.47					294	29.4	581.81	591.48					294	29.4	615.571	657.245					294	29.4	680.714	728.573
295	29.5	712.429	703.47					295	29.5	574.524	591.48					295	29.5	587.286	657.245					295	29.5	654.476	728.573
296	29.6	674.143	703.47					296	29.6	623.095	591.48					296	29.6	592.905	657.245					296	29.6	715.238	728.573
297	29.7	757.714	703.47					297	29.7	635.857	591.48					297	29.7	612.857	657.245					297	29.7	712	728.573
298	29.8	679.619	703.47					298	29.8	638.333	591.48					298	29.8	602.19	657.245					298	29.8	709.762	728.573
299	29.9	705.905	703.47					299	29.9	593.381	591.48					299	29.9	603.81	657.245					299	29.9	694.905	728.573
300	30	682.619	703.47					300	30	586.952	591.48					300	30	644.048	657.245					300	30	668.81	728.573
301	30.1	704.333	703.47					301	30.1	564.714	591.48					301	30.1	655.048	657.245					301	30.1	598.238	615.657
302	30.2	781.571	703.47					302	30.2	577.333	591.48					302	30.2	608.238	657.245					302	30.2	688.619	615.657
303	30.3	650.095	703.47					303	30.3	579	591.48					303	30.3	654.381	657.245					303	30.3	653.952	615.657
304	30.4	654.381	703.47					304	30.4	549.952	591.48					304	30.4	604.81	657.245					304	30.4	634.619	615.657
305	30.5	525.762	555.037					305	30.5	519.667	591.48					305	30.5	660	657.245					305	30.5	699.048	615.657
306	30.6	519.762	555.037					306	30.6	553.81	591.48					306	30.6	631.619	657.245					306	30.6	608.81	615.657
307	30.7	548.524	555.037					307	30.7	545.524	591.48					307	30.7	590.952	657.245					307	30.7	620.238	615.657
308	30.8	554	555.037					308	30.8	532.333	591.48					308	30.8	658.048	657.245					308	30.8	668.857	615.657
309	30.9	554.143	555.037					309	30.9	554.381	591.48					309	30.9	597.238	657.245					309	30.9	567.476	615.657
310	31	556.286	555.037					310	31	564.762	591.48					310	31	610.143	657.245					310	31	570	615.657
311	31.1	505	555.037					311	31.1	589.857	591.48					311	31.1	591.381	657.245					311	31.1	561.333	615.657
312	31.2	565.81	555.037					312	31.2	592.048	591.48					312	31.2	618.905	657.245					312	31.2	508.952	615.657
313	31.3	590.095	555.037					313	31.3	546.143	591.48					313	31.3	604.762	657.245					313	31.3	558	615.657
314	31.4	704.762	703.47					314	31.4	530.762	591.48					314	31.4	619.524	657.245					314	31.4	664.19	615.657
315	31.5	569.905	555.037					315	31.5	579.619	591.48					315	31.5	603.619	657.245					315	31.5	685.762	615.657
316	31.6	517.667	555.037					316	31.6	573.952	591.48					316	31.6	647.095	657.245					316	31.6	601.19	615.657
317	31.7	554.429	555.037					317	31.7	532.619	591.48					317	31.7	628.333	657.245					317	31.7	681.19	615.657
318	31.8	534.286	555.037					318	31.8	559.905	591.48					318	31.8	664.905	657.245					318	31.8	540.81	615.657
319	31.9	532.238	555.037					319	31.9	524.381	591.48					319	31.9	603.81	657.245					319	31.9	562.095	615.657
320	32	549.429	555.037					320	32	561.571	591.48					320	32	683.143	657.245					320	32	613.667	615.657
321	32.1	518.952	555.037					321	32.1	616.048	591.48					321	32.1	756.095	657.245					321	32.1	622.667	615.657
322	32.2	528.286	555.037					322	32.2	617.19	591.48					322	32.2	677.048	657.245					322	32.2	768.429	728.573
323	32.3	565.81	555.037					323	32.3	559.857	591.48					323	32.3	707.952	657.245					323	32.3	813.095	728.573
324	32.4	505.571	555.037					324	32.4	556.762	591.48					324	32.4	730.143	767.157					324	32.4	840.524	728.573
325	32.5	553	555.037					325	32.5	606.095	591.48					325	32.5	808.952	767.157					325	32.5	727.381	728.573
326	32.6	534.81	555.037					326	32.6	589.81	591.48					326	32.6	759	767.157					326	32.6	856.81	728.573
327	32.7	557.524	555.037					327	32.7	576.143	591.48					327	32.7	864.81	892.439					327	32.7	731.476	728.573
328	32.8	515.571	555.037					328	32.8	658.524	591.48					328	32.8	831.952	892.439					328	32.8	728.476	728.573
329	32.9	558.19	555.037					329	32.9	555.19	591.48					329	32.9	848.095	892.439					329	32.9	771.857	728.573
330	33	556.952	555.037					330	33	565.381	591.48					330	33	853.333	892.439					330	33	786.571	728.573
331	33.1	531.524	555.037					331	33.1	561.19	591.48					331	33.1	877.857	892.439					331	33.1	716.429	728.573
332	33.2	534.905	555.037					332	33.2	646.048	591.48					332	33.2	869.333	892.439					332	33.2	680.619	728.573
333	33.3	534.381	555.037					333	33.3	657.048	591.48					333	33.3	856.476	892.439					333	33.3	757.429	728.573
334	33.4	532.19	555.037					334	33.4	627.381	591.48					334	33.4	860.476	892.439					334	33.4	822.619	728.573
335	33.5	556.524	555.037					335	33.5	588.048	591.48					335	33.5	916.048	892.439					335	33.5	712.095	728.573
336	33.6	535.048	555.037					336	33.6	601.952	591.48					336	33.6	844.19	892.439					336	33.6	680.81	728.573
337	33.7	575.905	555.037					337	33.7	522.476	504.122					337	33.7	866.762	892.439					337	33.7	693.333	728.573
338	33.8	708.095	703.47					338	33.8	487.857	504.122					338	33.8	934.619	892.439					338	33.8	843.81	875.045
339	33.9	683.714	703.47					339	33.9	502.238	504.122					339	33.9	987.524	892.439					339	33.9	883.667	875.045
340	34	681.667	703.47					340	34	534.619	504.122					340	34	1073.1	892.439					340	34	853.048	875.045
341	34.1	664.048	703.47					341	34.1	514.905	504.122					341	34.1	902.81	892.439					341	34.1	781.905	875.045
342	34.2	673.762	703.47					342	34.2	515.952	504.122					342	34.2	910.667	892.439					342	34.2	837.619	875.045
343	34.3	702	703.47					343	34.3	495.429	504.122					343	34.3	886.143	892.439					343	34.3	718.619	875.045
344	34.4	584.952	703.47					344	34.4	451.619	504.122					344	34.4	864.381	892.439					344	34.4	786.952	875.045
345	34.5	758.524	703.47					345	34.5	521.905	504.122					345	34.5	774	892.439					345	34.5	855.571	875.045
346	34.6	669.286	703.47					346	34.6	499.19	504.122					346	34.6	793.238	892.439					346	34.6	893.952	875.045
347	34.7	712.238	703.47					347	34.7	516.952	504.122					347	34.7	924.571	892.439					347	34.7	904.667	875.045
348	34.8	756.143	703.47					348	34.8	479.762	504.122					348	34.8	935.095	892.439					348	34.8	854.857	875.045
349	34.9	691.667	703.47					349	34.9	493.714	504.122					349	34.9	856.81	892.439					349	34.9	926.667	875.045
350	35	726.857	703.47					350	35	488.381	504.122					350	35	878.476	892.439					350	35	933.429	875.045
351	35.1	643.476	703.47					351	35.1	467.333	504.122					351	35.1	892.81	892.439					351	35.1	868.81	875.045
352	35.2	734.571	703.47					352	35.2	421.714	431.117					352	35.2	818.619	892.439					352	35.2	916.429	875.045
353	35.3	754.286	703.47					353	35.3	416.19	431.117					353	35.3	926.524	892.439					353	35.3	908.429	875.045
354	35.4	846.571	837.182					354	35.4	384.571	431.117					354	35.4	957.571	892.439					354	35.4	927.619	875.045
355	35.5	872.19	837.182					355	35.5	415.524	431.117					355	35.5	874.381	892.439					355	35.5	1023.24	875.045
356	35.6	812.714	837.182					356	35.6	438.81	431.117					356	35.6	846.905	892.439					356	35.6	1013.43	875.045
357	35.7	761.286	837.182					357	35.7	398.19	431.117					357	35.7	837.048	892.439					357	35.7	975.905	875.045
358	35.8	825.19	837.182					358	35.8	413.619	431.117					358	35.8	840.619	892.439					358	35.8	845.81	875.045
359	35.9	867.048	837.182					359	35.9	400	431.117					359	35.9	856.381	892.439					359	35.9	904.571	875.045
360	36	766.762	837.182					360	36	444.905	431.117					360	36	852.143	892.439					360	36	961.524	875.045
361	36.1	860.81	837.182					361	36.1	438.333	431.117					361	36.1	760	892.439					361	36.1	863.143	875.045
362	36.2	810.571	837.182					362	36.2	424.857	431.117					362	36.2	835.429	892.439					362	36.2	882.19	875.045
363	36.3	800.048	837.182					363	36.3	462.952	431.117					363	36.3	813.952	892.439					363	36.3	913.762	875.045
364	36.4	852.381	837.182					364	36.4	439.667	431.117					364	36.4	937.048	892.439					364	36.4	979.095	875.045
365	36.5	749.476	837.182					365	36.5	394.714	431.117					365	36.5	917.857	892.439					365	36.5	936	875.045
366	36.6	787.667	837.182					366	36.6	463.286	431.117					366	36.6	887.476	892.439					366	36.6	930.19	875.045
367	36.7	789.19	837.182					367	36.7	402.286	431.117					367	36.7	838.095	892.439					367	36.7	897.81	875.045
368	36.8	770.714	837.182					368	36.8	473.238	504.122					368	36.8	866.714	892.439					368	36.8	890.619	875.045
369	36.9	863.667	837.182					369	36.9	471.905	504.122					369	36.9	940.286	892.439					369	36.9	876.286	875.045
370	37	779.667	837.182					370	37	498.429	504.122					370	37	849.905	892.439					370	37	903.952	875.045
371	37.1	847.571	837.182					371	37.1	491.81	504.122					371	37.1	909.81	892.439					371	37.1	920.333	875.045
372	37.2	819.952	837.182					372	37.2	477.238	504.122					372	37.2	891.571	892.439					372	37.2	945.048	875.045
373	37.3	718.571	703.47					373	37.3	535.143	504.122					373	37.3	848.429	892.439					373	37.3	882.095	875.045
374	37.4	651.238	703.47					374	37.4	483.619	504.122					374	37.4	819.762	892.439					374	37.4	790.19	728.573
375	37.5	664.048	703.47					375	37.5	407.381	431.117					375	37.5	901.762	892.439					375	37.5	798.286	728.573
376	37.6	666	703.47					376	37.6	390.238	431.117					376	37.6	896.619	892.439					376	37.6	678.952	728.573
377	37.7	670.571	703.47					377	37.7	410.381	431.117					377	37.7	846.381	892.439					377	37.7	629.429	728.573
378	37.8	682.524	703.47					378	37.8	531.571	504.122					378	37.8	843.19	892.439					378	37.8	665.429	728.573
379	37.9	634.286	703.47					379	37.9	513.381	504.122					379	37.9	855.048	892.439					379	37.9	680.524	728.573
380	38	652.333	703.47					380	38	508.143	504.122					380	38	871.571	892.439					380	38	695	728.573
381	38.1	602.429	703.47					381	38.1	528.714	504.122					381	38.1	914	892.439					381	38.1	705.238	728.573
382	38.2	735.048	703.47					382	38.2	513.476	504.122					382	38.2	902.476	892.439					382	38.2	702.143	728.573
383	38.3	753.714	703.47					383	38.3	525.905	504.122					383	38.3	890.429	892.439					383	38.3	665.095	728.573
384	38.4	742.857	703.47					384	38.4	570.19	591.48					384	38.4	863.619	892.439					384	38.4	734.143	728.573
385	38.5	711.905	703.47					385	38.5	592	591.48					385	38.5	878.429	892.439					385	38.5	710.571	728.573
386	38.6	664.048	703.47					386	38.6	629.524	591.48					386	38.6	779.476	767.157					386	38.6	657.095	728.573
387	38.7	648.286	703.47					387	38.7	624.762	591.48					387	38.7	778.619	767.157					387	38.7	643.619	728.573
388	38.8	605.095	703.47					388	38.8	580.429	591.48					388	38.8	776.857	767.157					388	38.8	636.333	728.573
389	38.9	658.571	703.47					389	38.9	562.143	591.48					389	38.9	799.143	767.157					389	38.9	638.905	728.573
390	39	679.762	703.47					390	39	598.048	591.48					390	39	748.857	767.157					390	39	711.095	728.573
391	39.1	636.952	703.47					391	39.1	585.81	591.48					391	39.1	735.619	767.157					391	39.1	645.667	728.573
392	39.2	669.381	703.47					392	39.2	588.048	591.48					392	39.2	768.286	767.157					392	39.2	664.952	728.573
393	39.3	678	703.47					393	39.3	575.476	591.48					393	39.3	749.19	767.157					393	39.3	718.143	728.573
394	39.4	715.381	703.47					394	39.4	599.333	591.48					394	39.4	787.238	767.157					394	39.4	705.905	728.573
395	39.5	683.19	703.47					395	39.5	510	504.122					395	39.5	736.048	767.157					395	39.5	714.381	728.573
396	39.6	697.19	703.47					396	39.6	522.048	504.122					396	39.6	733.476	767.157					396	39.6	654.667	615.657
397	39.7	682.619	703.47					397	39.7	515.571	504.122					397	39.7	728	767.157					397	39.7	674	615.657
398	39.8	653.762	703.47					398	39.8	496.19	504.122					398	39.8	759.667	767.157					398	39.8	565.238	615.657
399	39.9	699.238	703.47					399	39.9	497.905	504.122					399	39.9	813.429	767.157					399	39.9	556.905	615.657
400	40	703.619	703.47					400	40	482.286	504.122					400	40	766.524	767.157					400	40	552.81	615.657
401	40.1	700.143	703.47					401	40.1	493	504.122					401	40.1	828.762	767.157					401	40.1	574.714	615.657
402	40.2	667.333	703.47					402	40.2	488.81	504.122					402	40.2	703.238	767.157					402	40.2	548.381	615.657
403	40.3	800.619	837.182					403	40.3	490.048	504.122					403	40.3	777	767.157					403	40.3	622.714	615.657
404	40.4	855.238	837.182					404	40.4	442.238	504.122					404	40.4	799.095	767.157					404	40.4	653	615.657
405	40.5	848.238	837.182					405	40.5	484.81	504.122					405	40.5	785.333	767.157					405	40.5	612.952	615.657
406	40.6	762.429	837.182					406	40.6	455.81	504.122					406	40.6	649.762	767.157					406	40.6	642.571	615.657
407	40.7	784.81	837.182					407	40.7	405.81	504.122					407	40.7	788.81	767.157					407	40.7	575.714	615.657
408	40.8	753.667	703.47					408	40.8	503.286	504.122					408	40.8	762.381	767.157					408	40.8	599.524	615.657
409	40.9	660.857	703.47					409	40.9	494.048	504.122					409	40.9	723.095	767.157					409	40.9	627.476	615.657
410	41	686.381	703.47					410	41	481.571	504.122					410	41	772.524	767.157					410	41	627.476	615.657
411	41.1	709.667	703.47					411	41.1	488.19	504.122					411	41.1	738.524	767.157					411	41.1	624.143	615.657
412	41.2	638.714	703.47					412	41.2	529.667	504.122					412	41.2	781.619	767.157					412	41.2	569.143	615.657
413	41.3	669.143	703.47					413	41.3	440.524	504.122					413	41.3	903.143	892.439					413	41.3	603	615.657
414	41.4	671.81	703.47					414	41.4	479.476	504.122					414	41.4	887.667	892.439					414	41.4	671.714	615.657
415	41.5	682.476	703.47					415	41.5	505.429	504.122					415	41.5	940.381	892.439					415	41.5	627.524	615.657
416	41.6	738.714	703.47					416	41.6	561.381	591.48					416	41.6	851.81	892.439					416	41.6	609.952	615.657
417	41.7	704.143	703.47					417	41.7	572.333	591.48					417	41.7	1005.95	892.439					417	41.7	638.81	615.657
418	41.8	662.429	703.47					418	41.8	524.238	591.48					418	41.8	919.429	892.439					418	41.8	594.048	615.657
419	41.9	690.286	703.47					419	41.9	616.714	591.48					419	41.9	885.238	892.439					419	41.9	623.476	615.657
420	42	692.476	703.47					420	42	530.619	591.48					420	42	869.238	892.439					420	42	628.81	615.657
421	42.1	676	703.47					421	42.1	543.667	591.48					421	42.1	856.048	892.439					421	42.1	589.905	615.657
422	42.2	748.619	703.47					422	42.2	542.857	591.48					422	42.2	837.905	892.439					422	42.2	495.381	515.797
423	42.3	793.095	703.47					423	42.3	581	591.48					423	42.3	795.714	892.439					423	42.3	510.286	515.797
424	42.4	726.048	703.47					424	42.4	578.048	591.48					424	42.4	868.286	892.439					424	42.4	512.524	515.797
425	42.5	683.095	703.47					425	42.5	547.714	591.48					425	42.5	795.524	767.157					425	42.5	479.238	515.797
426	42.6	689.19	703.47					426	42.6	622.905	591.48					426	42.6	796.095	767.157					426	42.6	500.333	515.797
427	42.7	700.619	703.47					427	42.7	589.714	591.48					427	42.7	791.286	767.157					427	42.7	503	515.797
428	42.8	535.524	555.037					428	42.8	527.381	504.122					428	42.8	798.238	767.157					428	42.8	545.381	515.797
429	42.9	542.333	555.037					429	42.9	534.619	504.122					429	42.9	853.238	767.157					429	42.9	502.095	515.797
430	43	613.714	555.037					430	43	517.524	504.122					430	43	754.857	767.157					430	43	477.143	515.797
431	43.1	700	703.47					431	43.1	510.095	504.122					431	43.1	781.571	767.157					431	43.1	441.619	515.797
432	43.2	627.857	703.47					432	43.2	551.667	504.122					432	43.2	781.524	767.157					432	43.2	504.762	515.797
433	43.3	549.143	555.037					433	43.3	549.048	504.122					433	43.3	847.714	767.157					433	43.3	507.048	515.797
434	43.4	571.19	555.037					434	43.4	534.619	504.122					434	43.4	766.333	767.157					434	43.4	475.381	515.797
435	43.5	548.571	555.037					435	43.5	566.81	591.48					435	43.5	797.905	767.157					435	43.5	540.476	515.797
436	43.6	478.429	555.037					436	43.6	595.095	591.48					436	43.6	868.905	767.157					436	43.6	505.095	515.797
437	43.7	518.429	555.037					437	43.7	580.238	591.48					437	43.7	852.571	767.157					437	43.7	505.476	515.797
438	43.8	559.81	555.037					438	43.8	583.476	591.48					438	43.8	744.524	767.157					438	43.8	485.095	515.797
439	43.9	539.81	555.037					439	43.9	601.571	591.48					439	43.9	605.619	657.245					439	43.9	501.048	515.797
440	44	522.238	555.037					440	44	580.714	591.48					440	44	680.048	657.245					440	44	524.429	515.797
441	44.1	545.619	555.037					441	44.1	583	591.48					441	44.1	627.952	657.245					441	44.1	483.095	515.797
442	44.2	546.286	555.037					442	44.2	571.857	591.48					442	44.2	653.048	657.245					442	44.2	495.19	515.797
443	44.3	520.81	555.037					443	44.3	615.81	591.48					443	44.3	646.238	657.245					443	44.3	488.762	515.797
444	44.4	513.619	555.037					444	44.4	545.095	591.48					444	44.4	594.19	657.245					444	44.4	470.381	515.797
445	44.5	446.857	408.832					445	44.5	566.333	591.48					445	44.5	643.238	657.245					445	44.5	508.381	515.797
446	44.6	380.286	408.832					446	44.6	525.667	504.122					446	44.6	664.905	657.245					446	44.6	439	424.282
447	44.7	410.762	408.832					447	44.7	536	504.122					447	44.7	627.905	657.245					447	44.7	469.714	424.282
448	44.8	511.333	555.037					448	44.8	521.333	504.122					448	44.8	646.952	657.245					448	44.8	435.238	424.282
449	44.9	516.905	555.037					449	44.9	501.238	504.122					449	44.9	608.524	657.245					449	44.9	415.143	424.282
450	45	486.905	555.037					450	45	535.619	504.122					450	45	644.238	657.245					450	45	444.762	424.282
451	45.1	530.286	555.037					451	45.1	503.81	504.122					451	45.1	613.381	657.245					451	45.1	474.857	424.282
452	45.2	568.286	555.037					452	45.2	519.619	504.122					452	45.2	659.381	657.245					452	45.2	468.619	424.282
453	45.3	509.238	555.037					453	45.3	511.286	504.122					453	45.3	628.952	657.245					453	45.3	420.095	424.282
454	45.4	567.476	555.037					454	45.4	603.333	591.48					454	45.4	643.667	657.245					454	45.4	428.667	424.282
455	45.5	508.286	555.037					455	45.5	539.952	591.48					455	45.5	681.905	657.245					455	45.5	475.524	515.797
456	45.6	559.667	555.037					456	45.6	557.381	591.48					456	45.6	624.667	657.245					456	45.6	488.905	515.797
457	45.7	497.095	555.037					457	45.7	578.143	591.48					457	45.7	671.762	657.245					457	45.7	508.952	515.797
458	45.8	508.381	555.037					458	45.8	616.143	591.48					458	45.8	587.762	657.245					458	45.8	502.571	515.797
459	45.9	525.476	555.037					459	45.9	591.952	591.48					459	45.9	656	657.245					459	45.9	419.667	515.797
460	46	536.571	555.037					460	46	651	591.48					460	46	666.571	657.245					460	46	563.571	515.797
461	46.1	525.571	555.037					461	46.1	607.714	591.48					461	46.1	628.524	657.245					461	46.1	573.381	515.797
462	46.2	490.381	555.037					462	46.2	601.429	591.48					462	46.2	577	657.245					462	46.2	532.762	515.797
463	46.3	511.524	555.037					463	46.3	650.095	591.48					463	46.3	626.143	657.245					463	46.3	483.429	515.797
464	46.4	415.476	408.832					464	46.4	610.429	591.48					464	46.4	681.952	657.245					464	46.4	486.857	515.797
465	46.5	474.381	408.832					465	46.5	597.857	591.48					465	46.5	622.714	657.245					465	46.5	457.048	424.282
466	46.6	394.571	408.832					466	46.6	545.524	591.48					466	46.6	631.619	657.245					466	46.6	480.905	424.282
467	46.7	418.619	408.832					467	46.7	579.524	591.48					467	46.7	574.476	657.245					467	46.7	479.857	424.282
468	46.8	385.952	408.832					468	46.8	522.238	591.48					468	46.8	640.952	657.245					468	46.8	418.429	424.282
469	46.9	468.714	408.832					469	46.9	581.619	591.48					469	46.9	656.667	657.245					469	46.9	455	424.282
470	47	490.095	408.832					470	47	534.381	591.48					470	47	629	657.245					470	47	480.143	424.282
471	47.1	456.905	408.832					471	47.1	523.429	591.48					471	47.1	578.571	657.245					471	47.1	444.714	424.282
472	47.2	540.19	555.037					472	47.2	606.238	591.48					472	47.2	661.095	657.245					472	47.2	443.048	424.282
473	47.3	539.048	555.037					473	47.3	599.095	591.48					473	47.3	627.095	657.245					473	47.3	445.714	424.282
474	47.4	563	555.037					474	47.4	653	591.48					474	47.4	591	561.395					474	47.4	452.286	424.282
475	47.5	569.81	555.037					475	47.5	565.238	591.48					475	47.5	569.524	561.395					475	47.5	385.238	424.282
476	47.6	539.333	555.037					476	47.6	599.762	591.48					476	47.6	543.762	561.395					476	47.6	445.524	424.282
477	47.7	596.238	555.037					477	47.7	665.095	591.48					477	47.7	590.667	561.395					477	47.7	458.619	424.282
478	47.8	580.905	555.037					478	47.8	612.333	591.48					478	47.8	599.857	561.395					478	47.8	457.048	424.282
479	47.9	513.048	555.037					479	47.9	608.857	591.48					479	47.9	650.524	561.395					479	47.9	431.905	424.282
480	48	578.524	555.037					480	48	598.048	591.48					480	48	610.619	561.395					480	48	478.286	424.282
481	48.1	529.381	555.037					481	48.1	647.857	591.48					481	48.1	563.905	561.395					481	48.1	456.19	424.282
482	48.2	604.333	555.037					482	48.2	596.571	591.48					482	48.2	596.143	561.395					482	48.2	424.476	424.282
483	48.3	560.667	555.037					483	48.3	625.333	591.48					483	48.3	569.571	561.395					483	48.3	452.19	424.282
484	48.4	630.238	555.037					484	48.4	653.952	591.48					484	48.4	575.619	561.395					484	48.4	434.524	424.282
485	48.5	541	555.037					485	48.5	692.381	591.48					485	48.5	619.952	561.395					485	48.5	425.19	424.282
486	48.6	609	555.037					486	48.6	682.857	591.48					486	48.6	561.524	561.395					486	48.6	434.476	424.282
487	48.7	536.571	555.037					487	48.7	521.762	591.48					487	48.7	646.095	657.245					487	48.7	421.571	424.282
488	48.8	549	555.037					488	48.8	585.238	591.48					488	48.8	732.238	657.245					488	48.8	465.905	424.282
489	48.9	560.19	555.037					489	48.9	509.381	591.48					489	48.9	728.19	657.245					489	48.9	443.571	424.282
490	49	582.143	555.037					490	49	516.524	591.48					490	49	663.905	657.245					490	49	442.667	424.282
491	49.1	577.286	555.037					491	49.1	579.238	591.48					491	49.1	723.952	657.245					491	49.1	442.143	424.282
492	49.2	548.524	555.037					492	49.2	548.524	591.48					492	49.2	669.667	657.245					492	49.2	508.714	515.797
493	49.3	594.048	555.037					493	49.3	568.857	591.48					493	49.3	600.857	657.245					493	49.3	554.238	515.797
494	49.4	610.286	555.037					494	49.4	531.667	591.48					494	49.4	607.143	657.245					494	49.4	574.762	515.797
495	49.5	676.095	703.47					495	49.5	535.286	591.48					495	49.5	658.905	657.245					495	49.5	423.571	424.282
496	49.6	670.857	703.47					496	49.6	550.714	591.48					496	49.6	645.429	657.245					496	49.6	426.143	424.282
497	49.7	563.81	555.037					497	49.7	673.429	591.48					497	49.7	576.905	657.245					497	49.7	450.524	424.282
498	49.8	516.714	555.037					498	49.8	606.19	591.48					498	49.8	629.095	657.245					498	49.8	459.048	424.282
499	49.9	502.619	555.037					499	49.9	558.476	591.48					499	49.9	648.524	657.245					499	49.9	425.714	424.282
500	50	575.714	555.037					500	50	575.619	591.48					500	50	612.429	657.245					500	50	449.048	424.282
501	50.1	426.762	408.832					501	50.1	646.095	591.48					501	50.1	595.81	657.245					501	50.1	467.81	424.282
502	50.2	395.429	408.832					502	50.2	673.762	591.48					502	50.2	611.857	657.245					502	50.2	456.238	424.282
503	50.3	408.905	408.832					503	50.3	622.857	591.48					503	50.3	613.714	657.245					503	50.3	431.286	424.282
504	50.4	399.19	408.832					504	50.4	649.095	591.48					504	50.4	588.571	657.245					504	50.4	458.667	424.282
505	50.5	418.19	408.832					505	50.5	584.095	591.48					505	50.5	622.238	657.245					505	50.5	461.571	424.282
506	50.6	423.857	408.832					506	50.6	625.095	591.48					506	50.6	639.333	657.245					506	50.6	459.476	424.282
507	50.7	583.524	555.037					507	50.7	626.524	591.48					507	50.7	648.19	657.245					507	50.7	407.048	424.282
508	50.8	544.667	555.037					508	50.8	580.714	591.48					508	50.8	637.333	657.245					508	50.8	439.857	424.282
509	50.9	525.333	555.037					509	50.9	641.524	591.48					509	50.9	635.238	657.245					509	50.9	502.952	515.797
510	51	494.714	555.037					510	51	622.286	591.48					510	51	625.952	657.245					510	51	462.952	515.797
511	51.1	527.714	555.037					511	51.1	694.524	716.358					511	51.1	694.952	657.245					511	51.1	480.619	515.797
512	51.2	494	555.037					512	51.2	719.857	716.358					512	51.2	778.143	767.157					512	51.2	528.762	515.797
513	51.3	486.048	555.037					513	51.3	687.333	716.358					513	51.3	805.19	767.157					513	51.3	481.619	515.797
514	51.4	595.238	555.037					514	51.4	666.667	591.48					514	51.4	760.476	767.157					514	51.4	438.571	424.282
515	51.5	527.286	555.037					515	51.5	603.095	591.48					515	51.5	803.238	767.157					515	51.5	467.429	424.282
516	51.6	563.81	555.037					516	51.6	576.381	591.48					516	51.6	767.476	767.157					516	51.6	446.571	424.282
517	51.7	542.524	555.037					517	51.7	523.429	591.48					517	51.7	779.762	767.157					517	51.7	393.857	424.282
518	51.8	578.762	555.037					518	51.8	575.095	591.48					518	51.8	764.476	767.157					518	51.8	419.905	424.282
519	51.9	460	555.037					519	51.9	591.667	591.48					519	51.9	826.619	767.157					519	51.9	426.333	424.282
520	52	590.19	555.037					520	52	536.429	591.48					520	52	782.095	767.157					520	52	455.238	424.282
521	52.1	492.714	555.037					521	52.1	567.762	591.48					521	52.1	776.619	767.157					521	52.1	459.571	424.282
522	52.2	546.714	555.037					522	52.2	523	591.48					522	52.2	771.143	767.157					522	52.2	504.238	515.797
523	52.3	499.857	555.037					523	52.3	569.381	591.48					523	52.3	783.19	767.157					523	52.3	545.095	515.797
524	52.4	565.524	555.037					524	52.4	547.762	591.48					524	52.4	792.81	767.157					524	52.4	502.19	515.797
525	52.5	539.857	555.037					525	52.5	597.714	591.48					525	52.5	814.095	767.157					525	52.5	477	515.797
526	52.6	521.857	555.037					526	52.6	564.667	591.48					526	52.6	808.19	767.157					526	52.6	532.857	515.797
527	52.7	532.048	555.037					527	52.7	560.857	591.48					527	52.7	785.81	767.157					527	52.7	407.286	424.282
528	52.8	528.19	555.037					528	52.8	572.857	591.48					528	52.8	742.238	767.157					528	52.8	420.286	424.282
529	52.9	613.286	555.037					529	52.9	613.476	591.48					529	52.9	818.571	767.157					529	52.9	473.714	424.282
530	53	539.429	555.037					530	53	564	591.48					530	53	859.238	892.439					530	53	449.333	424.282
531	53.1	563.476	555.037					531	53.1	631.381	591.48					531	53.1	799	892.439					531	53.1	438.143	424.282
532	53.2	518.095	555.037					532	53.2	664.667	591.48					532	53.2	856.048	892.439					532	53.2	470.857	424.282
533	53.3	516.81	555.037					533	53.3	619.524	591.48					533	53.3	949.095	892.439					533	53.3	530.476	515.797
534	53.4	521.095	555.037					534	53.4	631.714	591.48					534	53.4	941.333	892.439					534	53.4	525.857	515.797
535	53.5	540.143	555.037					535	53.5	581.524	591.48					535	53.5	905.857	892.439					535	53.5	593.81	515.797
536	53.6	474.476	555.037					536	53.6	575	591.48					536	53.6	946.19	892.439					536	53.6	395.619	424.282
537	53.7	535.381	555.037					537	53.7	597.095	591.48					537	53.7	974.048	892.439					537	53.7	454.714	424.282
538	53.8	507.048	555.037					538	53.8	593.381	591.48					538	53.8	948.19	892.439					538	53.8	466.667	424.282
539	53.9	551.095	555.037					539	53.9	604.952	591.48					539	53.9	996.381	892.439					539	53.9	461.238	424.282
540	54	539.714	555.037					540	54	627.571	591.48					540	54	961.81	892.439					540	54	425.238	424.282
541	54.1	517.333	555.037					541	54.1	603.476	591.48					541	54.1	918.381	892.439					541	54.1	445.619	424.282
542	54.2	558.333	555.037					542	54.2	524.143	504.122					542	54.2	944.81	892.439					542	54.2	443.143	424.282
543	54.3	498.095	555.037					543	54.3	570.286	504.122					543	54.3	938.714	892.439					543	54.3	441.524	424.282
544	54.4	473.619	408.832					544	54.4	548.762	504.122					544	54.4	924.714	892.439					544	54.4	410	424.282
545	54.5	387.095	408.832					545	54.5	523.19	504.122					545	54.5	993.048	892.439					545	54.5	432.524	424.282
546	54.6	378.905	408.832					546	54.6	561.143	504.122					546	54.6	951.952	892.439					546	54.6	415.048	424.282
547	54.7	396.238	408.832					547	54.7	524.095	504.122					547	54.7	970.333	892.439					547	54.7	475.19	424.282
548	54.8	371.048	408.832					548	54.8	507	504.122					548	54.8	946.476	892.439					548	54.8	424.048	424.282
549	54.9	410.857	408.832					549	54.9	514.762	504.122					549	54.9	872.048	892.439					549	54.9	443.476	424.282
550	55	372.857	408.832					550	55	565.619	591.48					550	55	865	892.439					550	55	531.619	515.797
551	55.1	446.762	408.832					551	55.1	574.333	591.48					551	55.1	923.762	892.439					551	55.1	540.429	515.797
552	55.2	555.476	555.037					552	55.2	563.667	591.48					552	55.2	1048.62	892.439					552	55.2	522.476	515.797
553	55.3	419.905	408.832					553	55.3	610.857	591.48					553	55.3	878.143	892.439					553	55.3	529.762	515.797
554	55.4	423.952	408.832					554	55.4	614.476	591.48					554	55.4	935.714	892.439					554	55.4	514.238	515.797
555	55.5	422.714	408.832					555	55.5	611.762	591.48					555	55.5	935.571	892.439					555	55.5	529.619	515.797
556	55.6	417.81	408.832					556	55.6	567.81	591.48					556	55.6	922	892.439					556	55.6	520.381	515.797
557	55.7	428.095	408.832					557	55.7	561.905	591.48					557	55.7	864.762	892.439					557	55.7	561.571	615.657
558	55.8	366.143	408.832					558	55.8	581.762	591.48					558	55.8	1022	892.439					558	55.8	640.952	615.657
559	55.9	449	408.832					559	55.9	495.286	591.48					559	55.9	836.095	892.439					559	55.9	634.476	615.657
560	56	404.619	408.832					560	56	536.619	591.48					560	56	743.81	767.157					560	56	612.952	615.657
561	56.1	446.667	408.832					561	56.1	567.905	591.48					561	56.1	628.524	657.245					561	56.1	615.429	615.657
562	56.2	396.905	408.832					562	56.2	596.429	591.48					562	56.2	660.667	657.245					562	56.2	703.619	615.657
563	56.3	452.19	408.832					563	56.3	530.619	504.122					563	56.3	682.714	657.245					563	56.3	603.905	615.657
564	56.4	444.619	408.832					564	56.4	475.571	504.122					564	56.4	676.19	657.245					564	56.4	600.952	615.657
565	56.5	410.476	408.832					565	56.5	564.048	504.122					565	56.5	678.571	657.245					565	56.5	627.619	615.657
566	56.6	409.048	408.832					566	56.6	500.762	504.122					566	56.6	601.524	657.245					566	56.6	614.333	615.657
567	56.7	379.238	408.832					567	56.7	485.524	504.122					567	56.7	650.095	657.245					567	56.7	627.286	615.657
568	56.8	462.524	408.832					568	56.8	469.286	504.122					568	56.8	578.429	657.245					568	56.8	480.048	515.797
569	56.9	403.619	408.832					569	56.9	506.048	504.122					569	56.9	643.095	657.245					569	56.9	493.095	515.797
570	57	380.095	408.832					570	57	498.19	504.122					570	57	622.81	657.245					570	57	438.81	424.282
571	57.1	409.905	408.832					571	57.1	530.333	504.122					571	57.1	594.333	657.245					571	57.1	420.714	424.282
572	57.2	432.571	408.832					572	57.2	507.429	504.122					572	57.2	647.333	657.245					572	57.2	401.19	424.282
573	57.3	538.762	555.037					573	57.3	510.571	504.122					573	57.3	632.619	657.245					573	57.3	480.524	424.282
574	57.4	456.619	408.832					574	57.4	552.429	504.122					574	57.4	633.476	657.245					574	57.4	428.095	424.282
575	57.5	402.333	408.832					575	57.5	482.714	504.122					575	57.5	617.524	657.245					575	57.5	469	424.282
576	57.6	544	555.037					576	57.6	447.714	431.117					576	57.6	660.333	657.245					576	57.6	458.81	424.282
577	57.7	560.762	555.037					577	57.7	436.857	431.117					577	57.7	621.143	657.245					577	57.7	605.905	615.657
578	57.8	511.286	555.037					578	57.8	427.286	431.117					578	57.8	635.429	657.245					578	57.8	548.381	615.657
579	57.9	537.238	555.037					579	57.9	428.952	431.117					579	57.9	624.762	657.245					579	57.9	584.429	615.657
580	58	509.524	555.037					580	58	392.333	431.117					580	58	562.667	657.245					580	58	516.619	615.657
581	58.1	548.952	555.037					581	58.1	407.524	431.117					581	58.1	634.143	657.245					581	58.1	577.524	615.657
582	58.2	541.143	555.037					582	58.2	402.524	431.117					582	58.2	650	657.245					582	58.2	583.048	615.657
583	58.3	519.429	555.037					583	58.3	443.857	431.117					583	58.3	591.762	657.245					583	58.3	541.048	615.657
584	58.4	494.81	555.037					584	58.4	448.286	431.117					584	58.4	605.429	657.245					584	58.4	564.429	615.657
585	58.5	566.143	555.037					585	58.5	405.905	431.117					585	58.5	612.238	657.245					585	58.5	524.286	615.657
586	58.6	515	555.037					586	58.6	446.143	431.117					586	58.6	637.81	657.245					586	58.6	561.381	615.657
587	58.7	563.095	555.037					587	58.7	410.857	431.117					587	58.7	627.952	657.245					587	58.7	710.571	615.657
588	58.8	489.762	555.037					588	58.8	450	431.117					588	58.8	592.524	657.245					588	58.8	714.905	615.657
589	58.9	566.905	555.037					589	58.9	496.81	504.122					589	58.9	582.333	657.245					589	58.9	638.667	615.657
590	59	523.19	555.037					590	59	530.905	504.122					590	59	749.524	657.245					590	59	618.524	615.657
591	59.1	488.762	555.037					591	59.1	491.19	504.122					591	59.1	739.143	657.245					591	59.1	554.714	615.657
592	59.2	499.524	555.037					592	59.2	512.476	504.122					592	59.2	694.762	657.245					592	59.2	598.333	615.657
593	59.3	538.429	555.037					593	59.3	536.714	504.122					593	59.3	794	657.245					593	59.3	631.333	615.657
594	59.4	560.571	555.037					594	59.4	648.714	591.48					594	59.4	729.667	657.245					594	59.4	600.286	615.657
595	59.5	569	555.037					595	59.5	507.095	504.122					595	59.5	674.476	657.245					595	59.5	665.333	615.657
596	59.6	609.19	555.037					596	59.6	447.429	504.122					596	59.6	603	657.245					596	59.6	731	615.657
597	59.7	544.952	555.037					597	59.7	558.571	504.122					597	59.7	652.81	657.245					597	59.7	714.905	615.657
598	59.8	559.333	555.037					598	59.8	454.381	504.122					598	59.8	633.333	657.245					598	59.8	594.762	615.657
599	59.9	544.19	555.037					599	59.9	507.81	504.122					599	59.9	639.524	657.245					599	59.9	592.952	615.657
600	60	589.286	555.037					600	60	464.857	504.122					600	60	646.429	657.245					600	60	559.667	615.657
601	60.1	581.095	555.037					601	60.1	450.714	504.122					601	60.1	598.143	657.245					601	60.1	532.762	615.657
602	60.2	508.048	555.037					602	60.2	492.667	504.122					602	60.2	614.381	657.245					602	60.2	558.286	615.657
603	60.3	535.952	555.037					603	60.3	485.571	504.122					603	60.3	554.048	561.395					603	60.3	536	615.657
604	60.4	533.333	555.037					604	60.4	445	504.122					604	60.4	601.143	561.395					604	60.4	590.238	615.657
605	60.5	492.81	555.037					605	60.5	504.714	504.122					605	60.5	606.143	561.395					605	60.5	631.476	615.657
606	60.6	526.619	555.037					606	60.6	468.714	504.122					606	60.6	556.952	561.395					606	60.6	633.81	615.657
607	60.7	518.429	555.037					607	60.7	441.905	504.122					607	60.7	654.095	561.395					607	60.7	621.333	615.657
608	60.8	586.905	555.037					608	60.8	481.381	504.122					608	60.8	579.429	561.395					608	60.8	580.619	615.657
609	60.9	496.286	555.037					609	60.9	463.143	504.122					609	60.9	585.19	561.395					609	60.9	494.476	515.797
610	61	533.381	555.037					610	61	567.571	504.122					610	61	595.333	561.395					610	61	547.714	515.797
611	61.1	624.19	555.037					611	61.1	508.81	504.122					611	61.1	566.143	561.395					611	61.1	559.524	515.797
612	61.2	531.905	555.037					612	61.2	476.476	504.122					612	61.2	616.048	657.245					612	61.2	524.524	515.797
613	61.3	566.095	555.037					613	61.3	466.476	504.122					613	61.3	697.667	657.245					613	61.3	482.429	515.797
614	61.4	566.619	555.037					614	61.4	432.81	431.117					614	61.4	715.524	657.245					614	61.4	505.19	515.797
615	61.5	562.429	555.037					615	61.5	370.429	431.117					615	61.5	657.762	657.245					615	61.5	581.81	515.797
616	61.6	546.143	555.037					616	61.6	386.571	431.117					616	61.6	699.619	657.245					616	61.6	579.714	515.797
617	61.7	601.857	555.037					617	61.7	419.857	431.117					617	61.7	736.048	657.245					617	61.7	506.714	515.797
618	61.8	517	555.037					618	61.8	403.667	431.117					618	61.8	647.524	657.245					618	61.8	539	515.797
619	61.9	564.048	555.037					619	61.9	443.952	431.117					619	61.9	622.81	657.245					619	61.9	601.381	515.797
620	62	526.571	555.037					620	62	430.143	431.117					620	62	619.238	657.245					620	62	557.905	515.797
621	62.1	579.905	555.037					621	62.1	379.762	431.117					621	62.1	615.81	657.245					621	62.1	570.095	515.797
622	62.2	605.619	555.037					622	62.2	399.762	431.117					622	62.2	615.857	657.245					622	62.2	530.095	515.797
623	62.3	554.19	555.037					623	62.3	427.667	431.117					623	62.3	624.714	657.245					623	62.3	478.286	515.797
624	62.4	576.619	555.037					624	62.4	392.81	431.117					624	62.4	687.619	657.245					624	62.4	480.952	515.797
625	62.5	587.381	555.037					625	62.5	393.286	431.117					625	62.5	703.714	657.245					625	62.5	504.571	515.797
626	62.6	573.429	555.037					626	62.6	403.762	431.117					626	62.6	716	657.245					626	62.6	496.333	515.797
627	62.7	623.952	555.037					627	62.7	435.905	431.117					627	62.7	750.048	767.157					627	62.7	579.19	615.657
628	62.8	655.476	703.47					628	62.8	461.095	431.117					628	62.8	759.143	767.157					628	62.8	603.714	615.657
629	62.9	715.238	703.47					629	62.9	446.048	431.117					629	62.9	826.048	767.157					629	62.9	535.667	615.657
630	63	688.095	703.47					630	63	463.81	431.117					630	63	734.619	767.157					630	63	615.619	615.657
631	63.1	707.667	703.47					631	63.1	436	431.117					631	63.1	703.095	767.157					631	63.1	651.048	615.657
632	63.2	654.095	703.47					632	63.2	456.857	431.117					632	63.2	820.429	767.157					632	63.2	575.619	615.657
633	63.3	760.857	703.47					633	63.3	446.524	431.117					633	63.3	858.238	767.157					633	63.3	579	615.657
634	63.4	661.714	703.47					634	63.4	409.143	431.117					634	63.4	785.286	767.157					634	63.4	672.619	615.657
635	63.5	691.857	703.47					635	63.5	474.238	504.122					635	63.5	747	767.157					635	63.5	602.762	615.657
636	63.6	718.667	703.47					636	63.6	509.952	504.122					636	63.6	699.905	767.157					636	63.6	718.952	728.573
637	63.7	693.381	703.47					637	63.7	478.095	504.122					637	63.7	748.857	767.157					637	63.7	675.524	728.573
638	63.8	656.048	703.47					638	63.8	509.619	504.122					638	63.8	710.333	767.157					638	63.8	691.476	728.573
639	63.9	708.905	703.47					639	63.9	564	591.48					639	63.9	747.476	767.157					639	63.9	653.19	728.573
640	64	685.619	703.47					640	64	556.238	591.48					640	64	787.048	767.157					640	64	664.048	728.573
641	64.1	760.476	703.47					641	64.1	591.048	591.48					641	64.1	777.095	767.157					641	64.1	675.571	728.573
642	64.2	633.429	703.47					642	64.2	555.333	591.48					642	64.2	747.81	767.157					642	64.2	644.524	728.573
643	64.3	677.952	703.47					643	64.3	575.571	591.48					643	64.3	772.381	767.157					643	64.3	700.762	728.573
644	64.4	562.524	555.037					644	64.4	573.667	591.48					644	64.4	784.333	767.157					644	64.4	698.762	728.573
645	64.5	570.667	555.037					645	64.5	550.571	591.48					645	64.5	706.429	767.157					645	64.5	689.952	728.573
646	64.6	675.762	703.47					646	64.6	514.81	504.122					646	64.6	737.048	767.157					646	64.6	779	728.573
647	64.7	703.524	703.47					647	64.7	553.952	504.122					647	64.7	721.333	767.157					647	64.7	709.095	728.573
648	64.8	713.238	703.47					648	64.8	510.143	504.122					648	64.8	758.857	767.157					648	64.8	681.81	728.573
649	64.9	653.81	703.47					649	64.9	518.286	504.122					649	64.9	717.429	767.157					649	64.9	723	728.573
650	65	738.905	703.47					650	65	477.619	504.122					650	65	822.619	767.157					650	65	784.476	728.573
651	65.1	681.762	703.47					651	65.1	494.524	504.122					651	65.1	770.286	767.157					651	65.1	804.095	728.573
652	65.2	720.429	703.47					652	65.2	457.333	504.122					652	65.2	813.476	767.157					652	65.2	772.571	728.573
653	65.3	746.81	703.47					653	65.3	492.048	504.122					653	65.3	832.81	767.157					653	65.3	808.857	728.573
654	65.4	694.762	703.47					654	65.4	498	504.122					654	65.4	778.333	767.157					654	65.4	832.571	728.573
655	65.5	629.952	703.47					655	65.5	537.476	504.122					655	65.5	766.381	767.157					655	65.5	739.095	728.573
656	65.6	776.143	837.182					656	65.6	486.286	504.122					656	65.6	733.524	767.157					656	65.6	771.714	728.573
657	65.7	877.476	837.182					657	65.7	470.333	504.122					657	65.7	770.238	767.157					657	65.7	755.857	728.573
658	65.8	857.905	837.182					658	65.8	481	504.122					658	65.8	764.667	767.157					658	65.8	806.095	728.573
659	65.9	821.476	837.182					659	65.9	507.048	504.122					659	65.9	751.381	767.157					659	65.9	764.905	728.573
660	66	880.619	837.182					660	66	513.524	504.122					660	66	803.143	767.157					660	66	798.857	728.573
661	66.1	828.524	837.182					661	66.1	484.476	504.122					661	66.1	721.238	767.157					661	66.1	774.524	728.573
662	66.2	853.381	837.182					662	66.2	471.952	504.122					662	66.2	820.429	767.157					662	66.2	801.095	728.573
663	66.3	873.381	837.182					663	66.3	555.667	591.48					663	66.3	723.952	767.157					663	66.3	783.524	728.573
664	66.4	846.143	837.182					664	66.4	579.19	591.48					664	66.4	734.81	767.157					664	66.4	895.143	875.045
665	66.5	836.143	837.182					665	66.5	534.095	591.48					665	66.5	760.905	767.157					665	66.5	801.905	875.045
666	66.6	893.429	837.182					666	66.6	589.381	591.48					666	66.6	783.048	767.157					666	66.6	893.333	875.045
667	66.7	862.952	837.182					667	66.7	560.571	591.48					667	66.7	796.381	767.157					667	66.7	871.905	875.045
668	66.8	715.714	703.47					668	66.8	519	591.48					668	66.8	758.667	767.157					668	66.8	873.952	875.045
669	66.9	705.714	703.47					669	66.9	571.905	591.48					669	66.9	819.857	767.157					669	66.9	877.619	875.045
670	67	729.476	703.47					670	67	607.81	591.48					670	67	709.905	767.157					670	67	961.333	875.045
671	67.1	786.19	837.182					671	67.1	579.476	591.48					671	67.1	807.048	767.157					671	67.1	838.143	875.045
672	67.2	883.19	837.182					672	67.2	572.048	591.48					672	67.2	687.429	767.157					672	67.2	868	875.045
673	67.3	841.857	837.182					673	67.3	499.143	591.48					673	67.3	773.667	767.157					673	67.3	853.952	875.045
674	67.4	841.048	837.182					674	67.4	498.048	591.48					674	67.4	739.524	767.157					674	67.4	1000.29	875.045
675	67.5	835.381	837.182					675	67.5	555.048	591.48					675	67.5	751.19	767.157					675	67.5	972.381	875.045
676	67.6	879.048	837.182					676	67.6	586.238	591.48					676	67.6	704.286	767.157					676	67.6	911.286	875.045
677	67.7	904.381	837.182					677	67.7	558	591.48					677	67.7	736.524	767.157					677	67.7	866.524	875.045
678	67.8	856.619	837.182					678	67.8	573.429	591.48					678	67.8	718.095	767.157					678	67.8	843.19	875.045
679	67.9	813.762	837.182					679	67.9	603.429	591.48					679	67.9	778.667	767.157					679	67.9	944.81	875.045
680	68	835.762	837.182					680	68	540.048	504.122					680	68	787.524	767.157					680	68	943.667	875.045
681	68.1	899.381	837.182					681	68.1	496.286	504.122					681	68.1	777.429	767.157					681	68.1	1020.86	875.045
682	68.2	784.095	837.182					682	68.2	481.238	504.122					682	68.2	788.952	767.157					682	68.2	985.81	875.045
683	68.3	871.905	837.182					683	68.3	511.286	504.122					683	68.3	802.429	767.157					683	68.3	845.238	875.045
684	68.4	940.333	837.182					684	68.4	565.762	504.122					684	68.4	643.667	657.245					684	68.4	879.381	875.045
685	68.5	883.762	837.182					685	68.5	485.333	504.122					685	68.5	728.381	657.245					685	68.5	832.238	875.045
686	68.6	819.905	837.182					686	68.6	494.524	504.122					686	68.6	627.81	657.245					686	68.6	799.095	875.045
687	68.7	819	837.182					687	68.7	404.238	431.117					687	68.7	683.667	657.245					687	68.7	866.238	875.045
688	68.8	833.238	837.182					688	68.8	439.19	431.117					688	68.8	606.238	657.245					688	68.8	924.143	875.045
689	68.9	868.19	837.182					689	68.9	411.857	431.117					689	68.9	604.095	657.245					689	68.9	782.762	875.045
690	69	848.619	837.182					690	69	427.762	431.117					690	69	589.524	657.245					690	69	831.762	875.045
691	69.1	807.762	837.182					691	69.1	444.238	431.117					691	69.1	572.714	657.245					691	69.1	796.381	875.045
692	69.2	640.571	703.47					692	69.2	436.333	431.117					692	69.2	631.286	657.245					692	69.2	730.143	875.045
693	69.3	739.905	703.47					693	69.3	403.81	431.117					693	69.3	624.476	657.245					693	69.3	822.81	875.045
694	69.4	688.429	703.47					694	69.4	435.381	431.117					694	69.4	686.286	657.245					694	69.4	828	875.045
695	69.5	672.048	703.47					695	69.5	416.571	431.117					695	69.5	687.286	657.245					695	69.5	832	875.045
696	69.6	685.667	703.47					696	69.6	381.905	431.117					696	69.6	609.286	657.245					696	69.6	814	875.045
697	69.7	637.857	703.47					697	69.7	407.952	431.117					697	69.7	639.952	657.245					697	69.7	867.619	875.045
698	69.8	653.476	703.47					698	69.8	422.143	431.117					698	69.8	661.667	657.245					698	69.8	861.333	875.045
699	69.9	704.143	703.47					699	69.9	417.286	431.117					699	69.9	648.619	657.245					699	69.9	841.571	875.045
700	70	649.095	703.47					700	70	423.619	431.117					700	70	639.571	657.245					700	70	776.857	875.045
701	70.1	694.333	703.47					701	70.1	453.333	431.117					701	70.1	597.762	657.245					701	70.1	807.238	875.045
702	70.2	719.19	703.47					702	70.2	432.762	431.117					702	70.2	614.19	657.245					702	70.2	777.476	875.045
703	70.3	731.619	703.47					703	70.3	438.857	431.117					703	70.3	633.952	657.245					703	70.3	778.952	875.045
704	70.4	714.857	703.47					704	70.4	455.286	431.117					704	70.4	631.381	657.245					704	70.4	857.381	875.045
705	70.5	678.429	703.47					705	70.5	508.905	504.122					705	70.5	674.048	657.245					705	70.5	837.762	875.045
706	70.6	677.381	703.47					706	70.6	508.429	504.122					706	70.6	651	657.245					706	70.6	830.762	875.045
707	70.7	750.476	703.47					707	70.7	515.095	504.122					707	70.7	640.429	657.245					707	70.7	846.905	875.045
708	70.8	670.19	703.47					708	70.8	524.048	504.122					708	70.8	608.048	657.245					708	70.8	767	875.045
709	70.9	706.571	703.47					709	70.9	551.381	504.122					709	70.9	600.524	657.245					709	70.9	765.619	875.045
710	71	719.524	703.47					710	71	464.524	504.122					710	71	592.524	657.245					710	71	832.524	875.045
711	71.1	723.143	703.47					711	71.1	529.333	504.122					711	71.1	609.095	657.245					711	71.1	776.952	875.045
712	71.2	694.381	703.47					712	71.2	492.762	504.122					712	71.2	629.81	657.245					712	71.2	841.238	875.045
713	71.3	645.619	703.47					713	71.3	440.19	504.122					713	71.3	577.619	657.245					713	71.3	781.333	875.045
714	71.4	472.286	555.037					714	71.4	479.571	504.122					714	71.4	624.429	657.245					714	71.4	816.952	875.045
715	71.5	515.857	555.037					715	71.5	392.238	504.122					715	71.5	605.19	657.245					715	71.5	804.143	875.045
716	71.6	597.476	555.037					716	71.6	480.714	504.122					716	71.6	597.714	657.245					716	71.6	826.286	875.045
717	71.7	534.048	555.037					717	71.7	469.857	504.122					717	71.7	681.667	657.245					717	71.7	867.476	875.045
718	71.8	550.667	555.037					718	71.8	462.524	504.122					718	71.8	609	657.245					718	71.8	992.476	875.045
719	71.9	509.333	555.037					719	71.9	487.571	504.122					719	71.9	655.619	657.245					719	71.9	890.762	875.045
720	72	557.667	555.037					720	72	493.238	504.122					720	72	716.857	767.157					720	72	859.619	875.045
721	72.1	609.048	555.037					721	72.1	524.238	504.122					721	72.1	782.762	767.157					721	72.1	816.714	875.045
722	72.2	539	555.037					722	72.2	468.619	504.122					722	72.2	807.286	767.157					722	72.2	802.905	875.045
723	72.3	580.762	555.037					723	72.3	477	504.122					723	72.3	753.143	767.157					723	72.3	822.19	875.045
724	72.4	575.952	555.037					724	72.4	503.286	504.122					724	72.4	749.19	767.157					724	72.4	811.286	875.045
725	72.5	559.381	555.037					725	72.5	529.857	504.122					725	72.5	778.143	767.157					725	72.5	918.333	875.045
726	72.6	518.333	555.037					726	72.6	515	504.122					726	72.6	767.714	767.157					726	72.6	819.095	875.045
727	72.7	493.19	555.037					727	72.7	571.286	591.48					727	72.7	802.19	767.157					727	72.7	823.238	875.045
728	72.8	543.762	555.037					728	72.8	690.952	716.358					728	72.8	741.619	767.157					728	72.8	908.714	875.045
729	72.9	591.571	555.037					729	72.9	674.238	716.358					729	72.9	702.667	767.157					729	72.9	774.429	728.573
730	73	597.714	555.037					730	73	780.429	716.358					730	73	790.81	767.157					730	73	737.381	728.573
731	73.1	546.429	555.037					731	73.1	772.667	716.358					731	73.1	746.333	767.157					731	73.1	745.571	728.573
732	73.2	610.381	555.037					732	73.2	747.19	716.358					732	73.2	748.619	767.157					732	73.2	714.905	728.573
733	73.3	550.524	555.037					733	73.3	763.619	716.358					733	73.3	838.714	767.157					733	73.3	660.381	728.573
734	73.4	564.238	555.037					734	73.4	673.238	716.358					734	73.4	819.238	767.157					734	73.4	690.381	728.573
735	73.5	575.762	555.037					735	73.5	645.19	591.48					735	73.5	721.714	767.157					735	73.5	851.667	728.573
736	73.6	507.19	555.037					736	73.6	597.048	591.48					736	73.6	796.095	767.157					736	73.6	675.095	728.573
737	73.7	551.667	555.037					737	73.7	550.238	591.48					737	73.7	714.81	767.157					737	73.7	745.762	728.573
738	73.8	561.619	555.037					738	73.8	564.238	591.48					738	73.8	744.429	767.157					738	73.8	756.476	728.573
739	73.9	534.952	555.037					739	73.9	635	591.48					739	73.9	724.571	767.157					739	73.9	811.286	728.573
740	74	548.952	555.037					740	74	521.333	591.48					740	74	816.762	767.157					740	74	835	728.573
741	74.1	563.429	555.037					741	74.1	657.333	591.48					741	74.1	859.857	767.157					741	74.1	739.476	728.573
742	74.2	597.857	555.037					742	74.2	554.381	591.48					742	74.2	656.238	767.157					742	74.2	851.667	728.573
743	74.3	545.381	555.037					743	74.3	542.429	591.48					743	74.3	758.857	767.157					743	74.3	793.524	728.573
744	74.4	683.19	703.47					744	74.4	526.429	591.48					744	74.4	720.619	767.157					744	74.4	821.619	728.573
745	74.5	706	703.47					745	74.5	516.571	591.48					745	74.5	767.381	767.157					745	74.5	717.429	728.573
746	74.6	694.905	703.47					746	74.6	523.81	591.48					746	74.6	739.714	767.157					746	74.6	736.333	728.573
747	74.7	645.429	703.47					747	74.7	583.905	591.48					747	74.7	629.476	657.245					747	74.7	913.476	728.573
748	74.8	610.619	703.47					748	74.8	596.429	591.48					748	74.8	655.095	657.245					748	74.8	833.476	728.573
749	74.9	693.381	703.47					749	74.9	528.952	504.122					749	74.9	648.81	657.245					749	74.9	814.333	728.573
750	75	665.095	703.47					750	75	528.095	504.122					750	75	600.381	657.245					750	75	686.81	728.573
751	75.1	667.19	703.47					751	75.1	513.762	504.122					751	75.1	613.905	657.245					751	75.1	742.905	728.573
752	75.2	753.571	703.47					752	75.2	559.81	504.122					752	75.2	581.048	657.245					752	75.2	791.238	728.573
753	75.3	666.19	703.47					753	75.3	489.048	504.122					753	75.3	629.19	657.245					753	75.3	887.143	728.573
754	75.4	751.143	703.47					754	75.4	483.19	504.122					754	75.4	561.286	657.245					754	75.4	848.286	728.573
755	75.5	688.19	703.47					755	75.5	562.952	504.122					755	75.5	668.048	657.245					755	75.5	816.476	728.573
756	75.6	669.762	703.47					756	75.6	557.571	504.122					756	75.6	656.095	657.245					756	75.6	778.333	728.573
757	75.7	629	703.47					757	75.7	465.238	504.122					757	75.7	620.095	657.245					757	75.7	748.571	728.573
758	75.8	579.333	555.037					758	75.8	546.048	504.122					758	75.8	561.952	561.395					758	75.8	786.952	728.573
759	75.9	570.619	555.037					759	75.9	573.714	504.122					759	75.9	582.571	561.395					759	75.9	715.667	728.573
760	76	557.905	555.037					760	76	540.143	504.122					760	76	578.857	561.395					760	76	758.619	728.573
761	76.1	553.381	555.037					761	76.1	580.524	504.122					761	76.1	631.333	561.395					761	76.1	777.143	728.573
762	76.2	512.429	555.037					762	76.2	586.762	504.122					762	76.2	562.81	561.395					762	76.2	814.143	728.573
763	76.3	523.667	555.037					763	76.3	530.952	504.122					763	76.3	587.667	561.395					763	76.3	823.857	728.573
764	76.4	555.381	555.037					764	76.4	506.905	504.122					764	76.4	577.857	561.395					764	76.4	795.476	728.573
765	76.5	523.905	555.037					765	76.5	434.857	431.117					765	76.5	605.476	561.395					765	76.5	747.381	728.573
766	76.6	579	555.037					766	76.6	452.476	431.117					766	76.6	572.905	561.395					766	76.6	802	728.573
767	76.7	547.857	555.037					767	76.7	406.476	431.117					767	76.7	644.524	657.245					767	76.7	683.286	728.573
768	76.8	552.095	555.037					768	76.8	451.667	431.117					768	76.8	632.333	657.245					768	76.8	802.667	728.573
769	76.9	572.048	555.037					769	76.9	461.143	431.117					769	76.9	556.429	657.245					769	76.9	743.476	728.573
770	77	516.857	555.037					770	77	438.667	431.117					770	77	643.571	657.245					770	77	835.143	728.573
771	77.1	582.476	555.037					771	77.1	400.524	431.117					771	77.1	624.667	657.245					771	77.1	729.381	728.573
772	77.2	605.905	555.037					772	77.2	439.19	431.117					772	77.2	613.524	657.245					772	77.2	738.762	728.573
773	77.3	574.333	555.037					773	77.3	506.476	504.122					773	77.3	647.238	657.245					773	77.3	762.381	728.573
774	77.4	538.333	555.037					774	77.4	442.333	504.122					774	77.4	626.952	657.245					774	77.4	731.381	728.573
775	77.5	533.333	555.037					775	77.5	521.095	504.122					775	77.5	580.238	657.245					775	77.5	798.619	728.573
776	77.6	552.571	555.037					776	77.6	494.524	504.122					776	77.6	584.476	657.245					776	77.6	851.286	875.045
777	77.7	533.095	555.037					777	77.7	472.286	504.122					777	77.7	622.667	657.245					777	77.7	881.429	875.045
778	77.8	545.429	555.037					778	77.8	521.81	504.122					778	77.8	629.143	657.245					778	77.8	851.238	875.045
779	77.9	598	555.037					779	77.9	493.619	504.122					779	77.9	704.81	657.245					779	77.9	825.762	875.045
780	78	585.952	555.037					780	78	490.905	504.122					780	78	703.143	657.245					780	78	896.667	875.045
781	78.1	654.286	555.037					781	78.1	482.095	504.122					781	78.1	734.476	657.245					781	78.1	865.429	875.045
782	78.2	537.19	555.037					782	78.2	497.905	504.122					782	78.2	689.095	657.245					782	78.2	839.286	875.045
783	78.3	591.286	555.037					783	78.3	493	504.122					783	78.3	608.762	657.245					783	78.3	907.619	875.045
784	78.4	601.19	555.037					784	78.4	493.476	504.122					784	78.4	659.238	657.245					784	78.4	907.429	875.045
785	78.5	606.524	555.037					785	78.5	499.333	504.122					785	78.5	629.19	657.245					785	78.5	863.762	875.045
786	78.6	535.524	555.037					786	78.6	504.762	504.122					786	78.6	674	657.245					786	78.6	933.524	875.045
787	78.7	505.19	555.037					787	78.7	480.095	504.122					787	78.7	876.571	767.157					787	78.7	872.714	875.045
788	78.8	550.667	555.037					788	78.8	536.286	504.122					788	78.8	728.333	767.157					788	78.8	764.143	875.045
789	78.9	544.905	555.037					789	78.9	583.571	591.48					789	78.9	656.619	767.157					789	78.9	842.905	875.045
790	79	573.095	555.037					790	79	594.714	591.48					790	79	797.429	767.157					790	79	889.238	875.045
791	79.1	556.81	555.037					791	79.1	560.238	591.48					791	79.1	716.571	767.157					791	79.1	957.381	875.045
792	79.2	509.048	555.037					792	79.2	643.286	591.48					792	79.2	721.048	767.157					792	79.2	1060.29	875.045
793	79.3	518.762	555.037					793	79.3	596.19	591.48					793	79.3	755.429	767.157					793	79.3	932.143	875.045
794	79.4	548.476	555.037					794	79.4	584.238	591.48					794	79.4	703.81	767.157					794	79.4	1039.86	875.045
795	79.5	565.095	555.037					795	79.5	579.238	591.48					795	79.5	729.857	767.157					795	79.5	999.857	875.045
796	79.6	565.714	555.037					796	79.6	666.429	591.48					796	79.6	731	767.157					796	79.6	1020.1	875.045
797	79.7	567.238	555.037					797	79.7	671.286	591.48					797	79.7	712	767.157					797	79.7	911.571	875.045
798	79.8	604.81	555.037					798	79.8	618.952	591.48					798	79.8	732	767.157					798	79.8	995.905	875.045
799	79.9	604.095	555.037					799	79.9	670.905	591.48					799	79.9	770.524	767.157					799	79.9	822.238	875.045
800	80	574.381	555.037					800	80	637.429	591.48					800	80	721.524	767.157					800	80	852.81	875.045
801	80.1	610.619	555.037					801	80.1	548.905	591.48					801	80.1	770.857	767.157					801	80.1	862.095	875.045
802	80.2	576.333	555.037					802	80.2	612.905	591.48					802	80.2	736	767.157					802	80.2	823.905	875.045
803	80.3	628.143	555.037					803	80.3	624.143	591.48					803	80.3	731.81	767.157					803	80.3	894.476	875.045
804	80.4	532.333	555.037					804	80.4	583.048	591.48					804	80.4	716.048	767.157					804	80.4	830.667	875.045
805	80.5	585.714	555.037					805	80.5	564.19	591.48					805	80.5	704.905	767.157					805	80.5	849.476	875.045
806	80.6	572.81	555.037					806	80.6	555.714	591.48					806	80.6	726.667	767.157					806	80.6	811	875.045
807	80.7	560.714	555.037					807	80.7	517.571	504.122					807	80.7	735.429	767.157					807	80.7	773.19	875.045
808	80.8	555.429	555.037					808	80.8	517.476	504.122					808	80.8	724.905	767.157					808	80.8	780.429	875.045
809	80.9	576.095	555.037					809	80.9	513.238	504.122					809	80.9	867.571	892.439					809	80.9	928.857	875.045
810	81	597.429	555.037					810	81	476.381	504.122					810	81	893.524	892.439					810	81	797	728.573
811	81.1	578.381	555.037					811	81.1	495.095	504.122					811	81.1	891.81	892.439					811	81.1	686.571	728.573
812	81.2	573.048	555.037					812	81.2	504.857	504.122					812	81.2	936.19	892.439					812	81.2	659.619	728.573
813	81.3	533.619	555.037					813	81.3	482.81	504.122					813	81.3	882.143	892.439					813	81.3	691.048	728.573
814	81.4	538.333	555.037					814	81.4	541.381	504.122					814	81.4	862.952	892.439					814	81.4	677.048	728.573
815	81.5	549.143	555.037					815	81.5	468.905	504.122					815	81.5	843.333	892.439					815	81.5	735	728.573
816	81.6	571.524	555.037					816	81.6	546.81	504.122					816	81.6	879.381	892.439					816	81.6	692.857	728.573
817	81.7	582.286	555.037					817	81.7	522.095	504.122					817	81.7	825.857	892.439					817	81.7	646.476	615.657
818	81.8	564.048	555.037					818	81.8	520.381	504.122					818	81.8	839.524	892.439					818	81.8	596.286	615.657
819	81.9	536.524	555.037					819	81.9	550.905	504.122					819	81.9	806.048	767.157					819	81.9	616.286	615.657
820	82	564.81	555.037					820	82	547.952	504.122					820	82	769.286	767.157					820	82	492.619	515.797
821	82.1	594.143	555.037					821	82.1	550.429	504.122					821	82.1	751.81	767.157					821	82.1	532.714	515.797
822	82.2	558.238	555.037					822	82.2	541.667	504.122					822	82.2	847.238	767.157					822	82.2	515.048	515.797
823	82.3	547.048	555.037					823	82.3	534.714	504.122					823	82.3	793.429	767.157					823	82.3	559.714	515.797
824	82.4	551	555.037					824	82.4	604.381	504.122					824	82.4	731.286	767.157					824	82.4	561.476	515.797
825	82.5	605.143	555.037					825	82.5	562.286	504.122					825	82.5	841.048	767.157					825	82.5	540.667	515.797
826	82.6	600.238	555.037					826	82.6	562	504.122					826	82.6	828.429	767.157					826	82.6	590	515.797
827	82.7	536	555.037					827	82.7	544.81	504.122					827	82.7	769.048	767.157					827	82.7	520.524	515.797
828	82.8	625	555.037					828	82.8	500.714	504.122					828	82.8	790	767.157					828	82.8	617.19	515.797
829	82.9	599.952	555.037					829	82.9	544.571	504.122					829	82.9	737.429	767.157					829	82.9	526.143	515.797
830	83	591.667	555.037					830	83	487.762	504.122					830	83	776.048	767.157					830	83	485.714	515.797
831	83.1	581.524	555.037					831	83.1	550.952	504.122					831	83.1	767.905	767.157					831	83.1	564.095	515.797
832	83.2	569.143	555.037					832	83.2	546.476	504.122					832	83.2	758.952	767.157					832	83.2	534.619	515.797
833	83.3	586.238	555.037					833	83.3	445.286	431.117					833	83.3	682.333	657.245					833	83.3	520.476	515.797
834	83.4	540.143	555.037					834	83.4	455.238	431.117					834	83.4	683.571	657.245					834	83.4	539.619	515.797
835	83.5	568.429	555.037					835	83.5	418.952	431.117					835	83.5	761.952	657.245					835	83.5	500.857	515.797
836	83.6	611.286	555.037					836	83.6	394.857	431.117					836	83.6	720.238	657.245					836	83.6	547.905	515.797
837	83.7	592.048	555.037					837	83.7	411.81	431.117					837	83.7	678.571	657.245					837	83.7	510.714	515.797
838	83.8	539.571	555.037					838	83.8	437.952	431.117					838	83.8	693.81	657.245					838	83.8	580.095	615.657
839	83.9	556.476	555.037					839	83.9	395.81	431.117					839	83.9	670.571	657.245					839	83.9	663.333	615.657
840	84	557.429	555.037					840	84	487.571	504.122					840	84	720	767.157					840	84	633.19	615.657
841	84.1	533.905	555.037					841	84.1	474	504.122					841	84.1	778.619	767.157					841	84.1	680.857	728.573
842	84.2	566	555.037					842	84.2	500.667	504.122					842	84.2	769.238	767.157					842	84.2	691	728.573
843	84.3	513.667	555.037					843	84.3	508.381	504.122					843	84.3	756.143	767.157					843	84.3	714.238	728.573
844	84.4	597.143	555.037					844	84.4	476.095	504.122					844	84.4	776.476	767.157					844	84.4	763.667	728.573
845	84.5	519.619	555.037					845	84.5	501.762	504.122					845	84.5	770.333	767.157					845	84.5	641.714	728.573
846	84.6	586.19	555.037					846	84.6	498.762	504.122					846	84.6	695.714	767.157					846	84.6	652.476	728.573
847	84.7	608.905	555.037					847	84.7	494.381	504.122					847	84.7	767.905	767.157					847	84.7	638.714	728.573
848	84.8	511.095	555.037					848	84.8	531.857	504.122					848	84.8	834.571	767.157					848	84.8	688.143	728.573
849	84.9	535.095	555.037					849	84.9	551	591.48					849	84.9	722.286	767.157					849	84.9	673.429	728.573
850	85	571.19	555.037					850	85	570.095	591.48					850	85	637.095	657.245					850	85	717.619	728.573
851	85.1	529.381	555.037					851	85.1	617.381	591.48					851	85.1	612.095	657.245					851	85.1	696.143	728.573
852	85.2	518.571	555.037					852	85.2	647.524	591.48					852	85.2	637.905	657.245					852	85.2	718.667	728.573
853	85.3	563.429	555.037					853	85.3	601.476	591.48					853	85.3	687.048	657.245					853	85.3	634.571	615.657
854	85.4	534.667	555.037					854	85.4	624.095	591.48					854	85.4	613.048	657.245					854	85.4	616.19	615.657
855	85.5	512.667	555.037					855	85.5	647.476	591.48					855	85.5	568.619	657.245					855	85.5	604.952	615.657
856	85.6	539.762	555.037					856	85.6	679.571	591.48					856	85.6	634.762	657.245					856	85.6	575.524	615.657
857	85.7	549.476	555.037					857	85.7	660.333	591.48					857	85.7	625.762	657.245					857	85.7	540.762	615.657
858	85.8	538.19	555.037					858	85.8	690.905	591.48					858	85.8	645.476	657.245					858	85.8	552.714	615.657
859	85.9	545.524	555.037					859	85.9	655.857	591.48					859	85.9	674.667	657.245					859	85.9	586.667	615.657
860	86	532.238	555.037					860	86	703	591.48					860	86	621.905	657.245					860	86	567	615.657
861	86.1	532.714	555.037					861	86.1	618.143	591.48					861	86.1	599.333	657.245					861	86.1	603.667	615.657
862	86.2	540.095	555.037					862	86.2	672.333	591.48					862	86.2	605.238	657.245					862	86.2	581	615.657
863	86.3	559.429	555.037					863	86.3	661.095	591.48					863	86.3	637.524	657.245					863	86.3	580.714	615.657
864	86.4	579.667	555.037					864	86.4	574.286	591.48					864	86.4	588.381	657.245					864	86.4	658.524	615.657
865	86.5	560.048	555.037					865	86.5	636.619	591.48					865	86.5	601.048	657.245					865	86.5	636	615.657
866	86.6	590.333	555.037					866	86.6	643.048	591.48					866	86.6	567.952	657.245					866	86.6	588	615.657
867	86.7	522	555.037					867	86.7	706.286	716.358					867	86.7	655.476	657.245					867	86.7	648.048	615.657
868	86.8	538.476	555.037					868	86.8	707.238	716.358					868	86.8	617.238	657.245					868	86.8	603.143	615.657
869	86.9	594	555.037					869	86.9	676.571	716.358					869	86.9	608.19	657.245					869	86.9	585.429	615.657
870	87	520.19	555.037					870	87	719.714	716.358					870	87	594.048	561.395					870	87	587.762	615.657
871	87.1	559.905	555.037					871	87.1	642.286	591.48					871	87.1	588.524	561.395					871	87.1	592.524	615.657
872	87.2	552.476	555.037					872	87.2	668	591.48					872	87.2	557.381	561.395					872	87.2	701.095	615.657
873	87.3	534.667	555.037					873	87.3	652.476	591.48					873	87.3	576.714	561.395					873	87.3	612.524	615.657
874	87.4	625.905	703.47					874	87.4	595.619	591.48					874	87.4	629.238	561.395					874	87.4	583.81	615.657
875	87.5	738.619	703.47					875	87.5	681.952	591.48					875	87.5	578.81	561.395					875	87.5	687.238	615.657
876	87.6	662.905	703.47					876	87.6	670.905	591.48					876	87.6	583.476	561.395					876	87.6	601.238	615.657
877	87.7	703.571	703.47					877	87.7	643.905	591.48					877	87.7	571.048	561.395					877	87.7	654.667	615.657
878	87.8	711.476	703.47					878	87.8	680.571	591.48					878	87.8	598.905	561.395					878	87.8	674.238	615.657
879	87.9	692.524	703.47					879	87.9	677.048	591.48					879	87.9	617	657.245					879	87.9	634.286	615.657
880	88	668	703.47					880	88	617.571	591.48					880	88	612.714	657.245					880	88	646.667	615.657
881	88.1	660.571	703.47					881	88.1	652.429	591.48					881	88.1	618.857	657.245					881	88.1	613.19	615.657
882	88.2	587.81	555.037					882	88.2	691.429	591.48					882	88.2	572.714	657.245					882	88.2	653.81	615.657
883	88.3	564.667	555.037					883	88.3	655.238	591.48					883	88.3	641.19	657.245					883	88.3	598.476	615.657
884	88.4	545.381	555.037					884	88.4	646.762	591.48					884	88.4	602.429	657.245					884	88.4	576.476	615.657
885	88.5	620.905	555.037					885	88.5	664.524	591.48					885	88.5	612.952	657.245					885	88.5	613.619	615.657
886	88.6	601.619	555.037					886	88.6	642.714	591.48					886	88.6	619.286	657.245					886	88.6	565.857	615.657
887	88.7	634.571	555.037					887	88.7	639.667	591.48					887	88.7	623.571	657.245					887	88.7	612.619	615.657
888	88.8	549.19	555.037					888	88.8	669.667	591.48					888	88.8	613.381	657.245					888	88.8	661.524	615.657
889	88.9	554.19	555.037					889	88.9	627.381	591.48					889	88.9	618.524	657.245					889	88.9	612.238	615.657
890	89	604.571	555.037					890	89	674.143	591.48					890	89	662.905	657.245					890	89	623.238	615.657
891	89.1	533.905	555.037					891	89.1	655.476	591.48					891	89.1	586.095	657.245					891	89.1	650.19	615.657
892	89.2	605.714	555.037					892	89.2	631.238	591.48					892	89.2	653.429	657.245					892	89.2	619.238	615.657
893	89.3	715.19	703.47					893	89.3	615.381	591.48					893	89.3	610.429	657.245					893	89.3	655.667	615.657
894	89.4	761.095	703.47					894	89.4	658.571	591.48					894	89.4	610.524	657.245					894	89.4	648.333	615.657
895	89.5	782.571	703.47					895	89.5	609.381	591.48					895	89.5	645.143	657.245					895	89.5	642.857	615.657
896	89.6	767.19	703.47					896	89.6	590.19	591.48					896	89.6	636.333	657.245					896	89.6	632.857	615.657
897	89.7	705.095	703.47					897	89.7	650.619	591.48					897	89.7	706.238	657.245					897	89.7	632.714	615.657
898	89.8	764.286	703.47					898	89.8	587.238	591.48					898	89.8	615.714	657.245					898	89.8	620.19	615.657
899	89.9	742.095	703.47					899	89.9	633.143	591.48					899	89.9	603.143	657.245					899	89.9	581.381	615.657
900	90	735.286	703.47					900	90	623.762	591.48					900	90	628.476	657.245					900	90	628.286	615.657
901	90.1	759.571	703.47					901	90.1	599.476	591.48					901	90.1	635.952	657.245					901	90.1	728.476	728.573
902	90.2	742.952	703.47					902	90.2	536.429	591.48					902	90.2	626.714	657.245					902	90.2	712.143	728.573
903	90.3	771.714	703.47					903	90.3	573.476	591.48					903	90.3	618.81	657.245					903	90.3	713	728.573
904	90.4	779.333	703.47					904	90.4	612.095	591.48					904	90.4	604.619	657.245					904	90.4	790.143	728.573
905	90.5	726.095	703.47					905	90.5	633.571	591.48					905	90.5	600.571	657.245					905	90.5	729.143	728.573
906	90.6	776.286	703.47					906	90.6	665.952	591.48					906	90.6	591.714	657.245					906	90.6	736.857	728.573
907	90.7	781.333	703.47					907	90.7	644.048	591.48					907	90.7	621.429	657.245					907	90.7	737.19	728.573
908	90.8	589.524	703.47					908	90.8	603.619	591.48					908	90.8	539.476	561.395					908	90.8	771.333	728.573
909	90.9	747.238	703.47					909	90.9	624.429	591.48					909	90.9	591.333	561.395					909	90.9	736.857	728.573
910	91	675.095	703.47					910	91	626.381	591.48					910	91	564.952	561.395					910	91	745.81	728.573
911	91.1	722.095	703.47					911	91.1	602.714	591.48					911	91.1	593.429	561.395					911	91.1	762.667	728.573
912	91.2	731.619	703.47					912	91.2	608.429	591.48					912	91.2	567.048	561.395					912	91.2	749.762	728.573
913	91.3	559.429	555.037					913	91.3	576.667	591.48					913	91.3	566.286	561.395					913	91.3	683.286	728.573
914	91.4	608.571	555.037					914	91.4	555.095	591.48					914	91.4	591.905	561.395					914	91.4	638.143	728.573
915	91.5	577.095	555.037					915	91.5	603.429	591.48					915	91.5	587.905	561.395					915	91.5	698	728.573
916	91.6	610.619	555.037					916	91.6	613.429	591.48					916	91.6	611.143	561.395					916	91.6	700.143	728.573
917	91.7	594.524	555.037					917	91.7	650.571	591.48					917	91.7	554.619	561.395					917	91.7	678.571	728.573
918	91.8	589.048	555.037					918	91.8	635.286	591.48					918	91.8	582.667	561.395					918	91.8	744.238	728.573
919	91.9	624.143	555.037					919	91.9	624.857	591.48					919	91.9	605.952	561.395					919	91.9	649.762	728.573
920	92	592.19	555.037					920	92	613.333	591.48					920	92	579.81	561.395					920	92	617.429	728.573
921	92.1	508.905	555.037					921	92.1	626.81	591.48					921	92.1	603.857	561.395					921	92.1	708.286	728.573
922	92.2	561.095	555.037					922	92.2	647.857	591.48					922	92.2	584.095	561.395					922	92.2	749.429	728.573
923	92.3	538.286	555.037					923	92.3	629.476	591.48					923	92.3	675.19	657.245					923	92.3	740.905	728.573
924	92.4	705.667	703.47					924	92.4	631.857	591.48					924	92.4	719.095	657.245					924	92.4	811.476	728.573
925	92.5	745.429	703.47					925	92.5	592	591.48					925	92.5	865.286	892.439					925	92.5	851.19	728.573
926	92.6	658.714	703.47					926	92.6	580	591.48					926	92.6	834.714	892.439					926	92.6	830.905	728.573
927	92.7	700.381	703.47					927	92.7	602.524	591.48					927	92.7	898.238	892.439					927	92.7	698.952	728.573
928	92.8	662.619	703.47					928	92.8	623.762	591.48					928	92.8	886.81	892.439					928	92.8	676.429	728.573
929	92.9	675.429	703.47					929	92.9	603.571	591.48					929	92.9	849.143	892.439					929	92.9	742.762	728.573
930	93	684.571	703.47					930	93	524.667	591.48					930	93	904.905	892.439					930	93	728.429	728.573
931	93.1	662.952	703.47					931	93.1	577.524	591.48					931	93.1	909.619	892.439					931	93.1	782.429	728.573
932	93.2	675.952	703.47					932	93.2	554.952	591.48					932	93.2	716.286	767.157					932	93.2	883.19	728.573
933	93.3	648.857	703.47					933	93.3	557	591.48					933	93.3	805.762	767.157					933	93.3	810.857	728.573
934	93.4	720	703.47					934	93.4	539.714	591.48					934	93.4	732.286	767.157					934	93.4	832.905	728.573
935	93.5	686.095	703.47					935	93.5	509.19	591.48					935	93.5	691.905	657.245					935	93.5	787.095	728.573
936	93.6	692.714	703.47					936	93.6	551.762	591.48					936	93.6	733.238	657.245					936	93.6	835.571	728.573
937	93.7	767.381	703.47					937	93.7	530.095	591.48					937	93.7	664.381	657.245					937	93.7	829.571	728.573
938	93.8	732.19	703.47					938	93.8	567.667	591.48					938	93.8	670.619	657.245					938	93.8	758.524	728.573
939	93.9	718.762	703.47					939	93.9	573.048	591.48					939	93.9	688.381	657.245					939	93.9	757.571	728.573
940	94	712.619	703.47					940	94	548.571	591.48					940	94	771.429	657.245					940	94	834	728.573
941	94.1	739.952	703.47					941	94.1	569.286	591.48					941	94.1	695.095	657.245					941	94.1	823.429	728.573
942	94.2	737.19	703.47					942	94.2	604.286	591.48					942	94.2	607.905	657.245					942	94.2	748.571	728.573
943	94.3	574.81	555.037					943	94.3	627.048	591.48					943	94.3	598.857	561.395					943	94.3	705.143	728.573
944	94.4	581.238	555.037					944	94.4	591.857	591.48					944	94.4	560.667	561.395					944	94.4	606.524	728.573
945	94.5	540.143	555.037					945	94.5	635.19	591.48					945	94.5	561.762	561.395					945	94.5	641.143	728.573
946	94.6	581.762	555.037					946	94.6	551.667	591.48					946	94.6	569.571	561.395					946	94.6	678.19	728.573
947	94.7	587.381	555.037					947	94.7	639.857	591.48					947	94.7	578.905	561.395					947	94.7	719.619	728.573
948	94.8	603.762	555.037					948	94.8	603.095	591.48					948	94.8	556.429	561.395					948	94.8	674.81	728.573
949	94.9	588.381	555.037					949	94.9	628.905	591.48					949	94.9	557.524	561.395					949	94.9	648.667	728.573
950	95	568.667	555.037					950	95	568.81	591.48					950	95	549	561.395					950	95	690.095	728.573
951	95.1	579.714	555.037					951	95.1	596.095	591.48					951	95.1	560.095	561.395					951	95.1	715.429	728.573
952	95.2	626.143	555.037					952	95.2	555.286	591.48					952	95.2	563	561.395					952	95.2	654.476	728.573
953	95.3	598.571	555.037					953	95.3	578.905	591.48					953	95.3	716.714	657.245					953	95.3	729.143	728.573
954	95.4	636.048	703.47					954	95.4	594.667	591.48					954	95.4	755.286	657.245					954	95.4	689.619	728.573
955	95.5	620.048	703.47					955	95.5	647.857	591.48					955	95.5	583.333	561.395					955	95.5	703.381	728.573
956	95.6	752.381	703.47					956	95.6	610.381	591.48					956	95.6	593.19	561.395					956	95.6	697.762	728.573
957	95.7	714.048	703.47					957	95.7	607.524	591.48					957	95.7	579.905	561.395					957	95.7	764.381	728.573
958	95.8	550.762	555.037					958	95.8	603.476	591.48					958	95.8	533.19	561.395					958	95.8	776.571	728.573
959	95.9	554.429	555.037					959	95.9	618.381	591.48					959	95.9	599.286	561.395					959	95.9	718.095	728.573
960	96	585.857	555.037					960	96	652.619	591.48					960	96	553.571	561.395					960	96	715.571	728.573
961	96.1	598.571	555.037					961	96.1	578.476	591.48					961	96.1	599.762	561.395					961	96.1	756.905	728.573
962	96.2	673.571	555.037					962	96.2	626.333	591.48					962	96.2	596	561.395					962	96.2	714.81	728.573
963	96.3	585.905	555.037					963	96.3	509.762	591.48					963	96.3	585.476	561.395					963	96.3	731.667	728.573
964	96.4	602	555.037					964	96.4	572.429	591.48					964	96.4	591.857	561.395					964	96.4	714.048	728.573
965	96.5	604.143	555.037					965	96.5	609.81	591.48					965	96.5	550.048	561.395					965	96.5	797.952	728.573
966	96.6	569.905	555.037					966	96.6	601	591.48					966	96.6	611.952	561.395					966	96.6	764.952	728.573
967	96.7	558.81	555.037					967	96.7	527.048	591.48					967	96.7	608.333	561.395					967	96.7	776.81	728.573
968	96.8	628.095	555.037					968	96.8	570.905	591.48					968	96.8	589.762	561.395					968	96.8	698.429	728.573
969	96.9	610.714	555.037					969	96.9	541.667	591.48					969	96.9	618.667	657.245					969	96.9	695.333	728.573
970	97	546.286	555.037					970	97	576	591.48					970	97	611.381	657.245					970	97	680.714	728.573
971	97.1	519.381	555.037					971	97.1	545.619	591.48					971	97.1	679.095	657.245					971	97.1	677.762	728.573
972	97.2	676.524	555.037					972	97.2	580.762	591.48					972	97.2	668.952	657.245					972	97.2	716.476	728.573
973	97.3	634.476	555.037					973	97.3	588.857	591.48					973	97.3	611.429	657.245					973	97.3	762.857	728.573
974	97.4	590.095	555.037					974	97.4	633.333	591.48					974	97.4	598.571	657.245					974	97.4	719.905	728.573
975	97.5	609.762	555.037					975	97.5	634	591.48					975	97.5	636.381	657.245					975	97.5	672.143	728.573
976	97.6	600	555.037					976	97.6	560.571	591.48					976	97.6	624.476	657.245					976	97.6	621.619	615.657
977	97.7	563.714	555.037					977	97.7	609.095	591.48					977	97.7	597.095	657.245					977	97.7	701.524	615.657
978	97.8	576.857	555.037					978	97.8	612.571	591.48					978	97.8	629.524	657.245					978	97.8	662.857	615.657
979	97.9	637.429	555.037					979	97.9	558.857	591.48					979	97.9	628.952	657.245					979	97.9	586.952	615.657
980	98	549.143	555.037					980	98	547.667	591.48					980	98	620.286	657.245					980	98	630.381	615.657
981	98.1	628.762	703.47					981	98.1	583.429	591.48					981	98.1	738.095	767.157					981	98.1	642.524	615.657
982	98.2	716.571	703.47					982	98.2	568.714	591.48					982	98.2	789.333	767.157					982	98.2	668.571	615.657
983	98.3	748.476	703.47					983	98.3	597.524	591.48					983	98.3	803.857	767.157					983	98.3	645.095	615.657
984	98.4	706.952	703.47					984	98.4	645.429	591.48					984	98.4	779.286	767.157					984	98.4	696.048	728.573
985	98.5	708.429	703.47					985	98.5	629.762	591.48					985	98.5	726.762	767.157					985	98.5	713.286	728.573
986	98.6	730.952	703.47					986	98.6	642.571	591.48					986	98.6	812.333	767.157					986	98.6	672.238	728.573
987	98.7	664.952	703.47					987	98.7	604.238	591.48					987	98.7	720.667	767.157					987	98.7	639.19	728.573
988	98.8	598.524	555.037					988	98.8	607.381	591.48					988	98.8	778.238	767.157					988	98.8	686.476	728.573
989	98.9	594.238	555.037					989	98.9	549.238	591.48					989	98.9	582.286	657.245					989	98.9	637.905	728.573
990	99	594.81	555.037					990	99	667.143	591.48					990	99	589.381	657.245					990	99	691.952	728.573
991	99.1	617.714	555.037					991	99.1	576.714	591.48					991	99.1	731.571	767.157					991	99.1	659.762	728.573
992	99.2	590.905	555.037					992	99.2	659.048	591.48					992	99.2	774.143	767.157					992	99.2	672.667	728.573
993	99.3	639.81	555.037					993	99.3	643.095	591.48					993	99.3	726.762	767.157					993	99.3	666.238	728.573
994	99.4	606.381	555.037					994	99.4	598.571	591.48					994	99.4	793.952	767.157					994	99.4	644.857	728.573
995	99.5	546.952	555.037					995	99.5	667.238	591.48					995	99.5	610.286	561.395					995	99.5	703.857	728.573
996	99.6	569.238	555.037					996	99.6	619.333	591.48					996	99.6	540.143	561.395					996	99.6	727.429	728.573
997	99.7	600.619	555.037					997	99.7	640.952	591.48					997	99.7	571.143	561.395					997	99.7	731.714	728.573
998	99.8	525.286	555.037					998	99.8	624.952	591.48					998	99.8	561.095	561.395					998	99.8	645.476	728.573
999	99.9	582.143	555.037					999	99.9	621.952	591.48					999	99.9	664.857	657.245					999	99.9	655	728.573
1000	100	608	555.037					1000	100	654.333	591.48					1000	100	594.143	657.245					1000	100	637.286	728.573
1001	100.1	608.095	555.037					1001	100.1	704.762	716.358					1001	100.1	653.19	657.245					1001	100.1	656.857	728.573
1002	100.2	558.524	555.037					1002	100.2	677.571	716.358					1002	100.2	667.952	657.245					1002	100.2	657.524	728.573
1003	100.3	563	555.037					1003	100.3	665.143	716.358					1003	100.3	630.905	657.245					1003	100.3	679	728.573
1004	100.4	591.952	555.037					1004	100.4	693.714	716.358					1004	100.4	626.476	657.245					1004	100.4	696.333	728.573
1005	100.5	543.143	555.037					1005	100.5	658.095	716.358					1005	100.5	604.333	657.245					1005	100.5	640.667	728.573
1006	100.6	592.048	555.037					1006	100.6	706.905	716.358					1006	100.6	594.429	657.245					1006	100.6	624.19	728.573
1007	100.7	603.524	555.037					1007	100.7	687.429	716.358					1007	100.7	626.333	657.245					1007	100.7	767.095	728.573
1008	100.8	595.143	555.037					1008	100.8	628.333	716.358					1008	100.8	625.095	657.245					1008	100.8	797.238	728.573
1009	100.9	605.524	555.037					1009	100.9	729.143	716.358					1009	100.9	577.619	657.245					1009	100.9	730.905	728.573
1010	101	581.19	555.037					1010	101	623.905	716.358					1010	101	646.571	657.245					1010	101	717.857	728.573
1011	101.1	545.19	555.037					1011	101.1	657.619	716.358					1011	101.1	601.143	657.245					1011	101.1	691.048	728.573
1012	101.2	550.571	555.037					1012	101.2	674.238	716.358					1012	101.2	642.429	657.245					1012	101.2	658.143	615.657
1013	101.3	625.619	703.47					1013	101.3	721.143	716.358					1013	101.3	595.381	657.245					1013	101.3	660.286	615.657
1014	101.4	687.476	703.47					1014	101.4	728.476	716.358					1014	101.4	698.048	657.245					1014	101.4	647.286	615.657
1015	101.5	657.857	703.47					1015	101.5	730.571	716.358					1015	101.5	653.762	657.245					1015	101.5	611.857	615.657
1016	101.6	726.81	703.47					1016	101.6	701.524	716.358					1016	101.6	587.952	657.245					1016	101.6	639.762	615.657
1017	101.7	655	703.47					1017	101.7	672.476	716.358					1017	101.7	621.762	657.245					1017	101.7	612.571	615.657
1018	101.8	672.524	703.47					1018	101.8	763.905	716.358					1018	101.8	667.714	657.245					1018	101.8	688.571	728.573
1019	101.9	717.905	703.47					1019	101.9	666.714	716.358					1019	101.9	642.238	657.245					1019	101.9	644.381	728.573
1020	102	763.714	703.47					1020	102	696	716.358					1020	102	619.048	657.245					1020	102	677.571	728.573
1021	102.1	664.19	703.47					1021	102.1	724.81	716.358					1021	102.1	668.81	657.245					1021	102.1	671.952	728.573
1022	102.2	752.619	703.47					1022	102.2	755.095	716.358					1022	102.2	650.619	657.245					1022	102.2	677.762	728.573
1023	102.3	737.429	703.47					1023	102.3	712.381	716.358					1023	102.3	631.524	657.245					1023	102.3	639.905	728.573
1024	102.4	668.429	703.47					1024	102.4	735.571	716.358					1024	102.4	617.905	657.245					1024	102.4	706.524	728.573
1025	102.5	692	703.47					1025	102.5	794.048	716.358					1025	102.5	623	657.245					1025	102.5	722.333	728.573
1026	102.6	760.476	703.47					1026	102.6	772.524	716.358					1026	102.6	602.048	657.245					1026	102.6	730.286	728.573
1027	102.7	676.143	703.47					1027	102.7	784.286	716.358					1027	102.7	594	657.245					1027	102.7	686	728.573
1028	102.8	686.857	703.47					1028	102.8	773.286	716.358					1028	102.8	596.476	657.245					1028	102.8	734.19	728.573
1029	102.9	803.048	703.47					1029	102.9	782.81	716.358					1029	102.9	621.048	657.245					1029	102.9	729.524	728.573
1030	103	747.762	703.47					1030	103	733	716.358					1030	103	636	657.245					1030	103	696	728.573
1031	103.1	746.857	703.47					1031	103.1	688.524	716.358					1031	103.1	752.905	657.245					1031	103.1	682.048	728.573
1032	103.2	786.333	703.47					1032	103.2	734.952	716.358					1032	103.2	619.667	657.245					1032	103.2	678.762	728.573
1033	103.3	735.81	703.47					1033	103.3	702.905	716.358					1033	103.3	767.333	657.245					1033	103.3	747.095	728.573
1034	103.4	798.143	703.47					1034	103.4	727.952	716.358					1034	103.4	579.905	657.245					1034	103.4	697.714	728.573
1035	103.5	751.762	703.47					1035	103.5	792.333	716.358					1035	103.5	581.905	657.245					1035	103.5	712.714	728.573
1036	103.6	793.476	703.47					1036	103.6	679.571	716.358					1036	103.6	676.381	657.245					1036	103.6	705.381	728.573
1037	103.7	720.429	703.47					1037	103.7	695.524	716.358					1037	103.7	622	657.245					1037	103.7	707.286	728.573
1038	103.8	724.429	703.47					1038	103.8	720.381	716.358					1038	103.8	617.238	657.245					1038	103.8	714.476	728.573
1039	103.9	699.762	703.47					1039	103.9	707.952	716.358					1039	103.9	548.714	561.395					1039	103.9	642.952	728.573
1040	104	734.333	703.47					1040	104	682.381	716.358					1040	104	561.905	561.395					1040	104	800.286	728.573
1041	104.1	718.286	703.47					1041	104.1	663.81	591.48					1041	104.1	630.571	561.395					1041	104.1	734.857	728.573
1042	104.2	664.762	703.47					1042	104.2	637.381	591.48					1042	104.2	593.571	561.395					1042	104.2	737.952	728.573
1043	104.3	707.429	703.47					1043	104.3	656.571	591.48					1043	104.3	595.143	561.395					1043	104.3	739.905	728.573
1044	104.4	705.429	703.47					1044	104.4	621.238	591.48					1044	104.4	575.762	561.395					1044	104.4	742.857	728.573
1045	104.5	760.857	703.47					1045	104.5	635.19	591.48					1045	104.5	595.762	561.395					1045	104.5	810.048	728.573
1046	104.6	804.238	703.47					1046	104.6	650.905	591.48					1046	104.6	612.952	657.245					1046	104.6	756.952	728.573
1047	104.7	747.524	703.47					1047	104.7	635.667	591.48					1047	104.7	652.476	657.245					1047	104.7	767.429	728.573
1048	104.8	751.762	703.47					1048	104.8	559.143	591.48					1048	104.8	597.476	657.245					1048	104.8	729.905	728.573
1049	104.9	687.429	703.47					1049	104.9	594.81	591.48					1049	104.9	582.333	657.245					1049	104.9	767.714	728.573
1050	105	783.619	703.47					1050	105	629.714	591.48					1050	105	703.905	657.245					1050	105	714.667	728.573
1051	105.1	726.381	703.47					1051	105.1	568.714	591.48					1051	105.1	795	767.157					1051	105.1	664.429	615.657
1052	105.2	675.524	703.47					1052	105.2	601.619	591.48					1052	105.2	764.857	767.157					1052	105.2	596.333	615.657
1053	105.3	707.429	703.47					1053	105.3	592.333	591.48					1053	105.3	764.571	767.157					1053	105.3	544.905	615.657
1054	105.4	704.238	703.47					1054	105.4	595.714	591.48					1054	105.4	738.762	767.157					1054	105.4	580.476	615.657
1055	105.5	871.19	837.182					1055	105.5	631.19	591.48					1055	105.5	769.429	767.157					1055	105.5	658.619	615.657
1056	105.6	896.857	837.182					1056	105.6	671.048	591.48					1056	105.6	745.905	767.157					1056	105.6	683.476	728.573
1057	105.7	844.619	837.182					1057	105.7	665.381	591.48					1057	105.7	778.381	767.157					1057	105.7	752.81	728.573
1058	105.8	841.667	837.182					1058	105.8	666.714	591.48					1058	105.8	743.571	767.157					1058	105.8	698.524	728.573
1059	105.9	865.238	837.182					1059	105.9	652.143	591.48					1059	105.9	699.619	767.157					1059	105.9	681.143	728.573
1060	106	900.381	837.182					1060	106	657.524	591.48					1060	106	727.714	767.157					1060	106	696.857	728.573
1061	106.1	803.857	837.182					1061	106.1	667.667	591.48					1061	106.1	747.81	767.157					1061	106.1	691.714	728.573
1062	106.2	825.19	837.182					1062	106.2	659.667	591.48					1062	106.2	800.619	767.157					1062	106.2	781.429	728.573
1063	106.3	873.952	837.182					1063	106.3	674.19	591.48					1063	106.3	655.238	657.245					1063	106.3	729.619	728.573
1064	106.4	931.286	837.182					1064	106.4	657.381	591.48					1064	106.4	633	657.245					1064	106.4	661.429	728.573
1065	106.5	801.095	837.182					1065	106.5	678.81	716.358					1065	106.5	564.667	657.245					1065	106.5	712.619	728.573
1066	106.6	897.143	837.182					1066	106.6	711.857	716.358					1066	106.6	594.667	657.245					1066	106.6	709.333	728.573
1067	106.7	881.667	837.182					1067	106.7	749.095	716.358					1067	106.7	573.476	657.245					1067	106.7	672.19	728.573
1068	106.8	874.19	837.182					1068	106.8	735.333	716.358					1068	106.8	595.238	657.245					1068	106.8	684.476	728.573
1069	106.9	868.143	837.182					1069	106.9	746.952	716.358					1069	106.9	615.905	657.245					1069	106.9	713.095	728.573
1070	107	1002.33	837.182					1070	107	723.048	716.358					1070	107	702.952	657.245					1070	107	661.571	728.573
1071	107.1	799.143	837.182					1071	107.1	711.381	716.358					1071	107.1	577.905	561.395					1071	107.1	739.429	728.573
1072	107.2	889.238	837.182					1072	107.2	693.667	716.358					1072	107.2	580.381	561.395					1072	107.2	718.619	728.573
1073	107.3	906.857	837.182					1073	107.3	699.81	716.358					1073	107.3	592.81	561.395					1073	107.3	761.667	728.573
1074	107.4	855.952	837.182					1074	107.4	727.571	716.358					1074	107.4	597.524	561.395					1074	107.4	876.524	728.573
1075	107.5	841.095	837.182					1075	107.5	746.524	716.358					1075	107.5	563.571	561.395					1075	107.5	785.333	728.573
1076	107.6	873.524	837.182					1076	107.6	755.952	716.358					1076	107.6	559.333	561.395					1076	107.6	712.143	728.573
1077	107.7	909.333	837.182					1077	107.7	750.619	716.358					1077	107.7	571.286	561.395					1077	107.7	798.905	728.573
1078	107.8	864.857	837.182					1078	107.8	717.524	716.358					1078	107.8	582.333	561.395					1078	107.8	726.238	728.573
1079	107.9	942.476	837.182					1079	107.9	680.571	716.358					1079	107.9	553.381	561.395					1079	107.9	708.143	728.573
1080	108	960.286	837.182					1080	108	620.952	591.48					1080	108	561.429	561.395					1080	108	762.619	728.573
1081	108.1	859.381	837.182					1081	108.1	628.857	591.48					1081	108.1	616	561.395					1081	108.1	691.381	728.573
1082	108.2	842.857	837.182					1082	108.2	614.857	591.48					1082	108.2	592.524	561.395					1082	108.2	689.476	728.573
1083	108.3	783.476	837.182					1083	108.3	588.048	591.48					1083	108.3	617.333	561.395					1083	108.3	660.619	728.573
1084	108.4	881.429	837.182					1084	108.4	555.81	591.48					1084	108.4	604.905	561.395					1084	108.4	608.81	728.573
1085	108.5	875.333	837.182					1085	108.5	566.905	591.48					1085	108.5	635.429	561.395					1085	108.5	650	728.573
1086	108.6	813.381	837.182					1086	108.6	613.571	591.48					1086	108.6	580.571	561.395					1086	108.6	644.857	728.573
1087	108.7	881.19	837.182					1087	108.7	630.143	591.48					1087	108.7	570.762	561.395					1087	108.7	718.667	728.573
1088	108.8	972.095	837.182					1088	108.8	599.619	591.48					1088	108.8	536.857	561.395					1088	108.8	644.048	728.573
1089	108.9	946.143	837.182					1089	108.9	640.19	591.48					1089	108.9	542.81	561.395					1089	108.9	662.429	728.573
1090	109	857.619	837.182					1090	109	578.905	591.48					1090	109	604.667	561.395					1090	109	725.143	728.573
1091	109.1	921.952	837.182					1091	109.1	571.714	591.48					1091	109.1	614.905	561.395					1091	109.1	830.81	728.573
1092	109.2	850.762	837.182					1092	109.2	586.81	591.48					1092	109.2	564.524	561.395					1092	109.2	786.81	728.573
1093	109.3	884.333	837.182					1093	109.3	592.143	591.48					1093	109.3	598.905	561.395					1093	109.3	735.81	728.573
1094	109.4	855.619	837.182					1094	109.4	592.905	591.48					1094	109.4	551.286	561.395					1094	109.4	689.476	728.573
1095	109.5	826.238	837.182					1095	109.5	623	591.48					1095	109.5	719.286	657.245					1095	109.5	718.667	728.573
1096	109.6	837.524	837.182					1096	109.6	592.857	591.48					1096	109.6	731.095	657.245					1096	109.6	718.143	728.573
1097	109.7	882.429	837.182					1097	109.7	555	591.48					1097	109.7	744.333	657.245					1097	109.7	662	728.573
1098	109.8	897.238	837.182					1098	109.8	597.952	591.48					1098	109.8	652	657.245					1098	109.8	734.857	728.573
1099	109.9	784.095	837.182					1099	109.9	621.048	591.48					1099	109.9	602.571	561.395					1099	109.9	666.19	728.573
1100	110	722.714	837.182					1100	110	593.524	591.48					1100	110	557.905	561.395					1100	110	810.238	875.045
1101	110.1	877.048	837.182					1101	110.1	565.952	591.48					1101	110.1	525.952	561.395					1101	110.1	847.381	875.045
1102	110.2	774.952	837.182					1102	110.2	592.476	591.48					1102	110.2	592.667	561.395					1102	110.2	877	875.045
1103	110.3	790.286	837.182					1103	110.3	649.048	591.48					1103	110.3	614.952	561.395					1103	110.3	809.714	875.045
1104	110.4	767.857	837.182					1104	110.4	615.905	591.48					1104	110.4	569.238	561.395					1104	110.4	835.095	875.045
1105	110.5	757.143	837.182					1105	110.5	590.143	591.48					1105	110.5	549.905	561.395					1105	110.5	860.524	875.045
1106	110.6	826.381	837.182					1106	110.6	626.762	591.48					1106	110.6	650.905	657.245					1106	110.6	849.857	875.045
1107	110.7	771.762	837.182					1107	110.7	618.524	591.48					1107	110.7	724.333	767.157					1107	110.7	804.476	875.045
1108	110.8	755.905	703.47					1108	110.8	557	591.48					1108	110.8	714.81	767.157					1108	110.8	789.857	875.045
1109	110.9	616.238	555.037					1109	110.9	563.429	591.48					1109	110.9	773.286	767.157					1109	110.9	827.905	875.045
1110	111	567.714	555.037					1110	111	620.81	591.48					1110	111	767.476	767.157					1110	111	835.143	875.045
1111	111.1	625.667	555.037					1111	111.1	538.524	591.48					1111	111.1	759.81	767.157					1111	111.1	876.238	875.045
1112	111.2	594.762	555.037					1112	111.2	571.286	591.48					1112	111.2	669.524	767.157					1112	111.2	822.429	875.045
1113	111.3	623.143	555.037					1113	111.3	472.857	504.122					1113	111.3	709	767.157					1113	111.3	816.286	875.045
1114	111.4	651.476	555.037					1114	111.4	448.381	504.122					1114	111.4	693.619	767.157					1114	111.4	870.714	875.045
1115	111.5	630.238	555.037					1115	111.5	492.667	504.122					1115	111.5	739.429	767.157					1115	111.5	813.905	875.045
1116	111.6	575.286	555.037					1116	111.6	522.81	504.122					1116	111.6	696.524	767.157					1116	111.6	801.238	875.045
1117	111.7	578.762	555.037					1117	111.7	515.143	504.122					1117	111.7	726.429	767.157					1117	111.7	826.81	875.045
1118	111.8	599.81	555.037					1118	111.8	477.048	504.122					1118	111.8	728.667	767.157					1118	111.8	764.81	875.045
1119	111.9	576.429	555.037					1119	111.9	524.286	504.122					1119	111.9	700.048	767.157					1119	111.9	772.857	875.045
1120	112	578.19	555.037					1120	112	536.048	504.122					1120	112	708.619	767.157					1120	112	797.143	875.045
1121	112.1	542.857	555.037					1121	112.1	541.238	504.122					1121	112.1	739.095	767.157					1121	112.1	835.286	875.045
1122	112.2	576.476	555.037					1122	112.2	488.952	504.122					1122	112.2	708.381	767.157					1122	112.2	815.619	875.045
1123	112.3	537.238	555.037					1123	112.3	557.333	504.122					1123	112.3	712.381	767.157					1123	112.3	780.667	875.045
1124	112.4	615.429	555.037					1124	112.4	513.476	504.122					1124	112.4	818.286	767.157					1124	112.4	850.429	875.045
1125	112.5	596.571	555.037					1125	112.5	531.81	504.122					1125	112.5	725.095	767.157					1125	112.5	798.095	875.045
1126	112.6	562.143	555.037					1126	112.6	551.952	504.122					1126	112.6	819.238	767.157					1126	112.6	913.762	875.045
1127	112.7	539.143	555.037					1127	112.7	462.667	504.122					1127	112.7	715.762	767.157					1127	112.7	919.952	875.045
1128	112.8	609.333	555.037					1128	112.8	326.238	352.254					1128	112.8	786.333	767.157					1128	112.8	830.714	875.045
1129	112.9	592.429	555.037					1129	112.9	351.381	352.254					1129	112.9	755.667	767.157					1129	112.9	834.524	875.045
1130	113	574.238	555.037					1130	113	349.19	352.254					1130	113	699.286	767.157					1130	113	861.143	875.045
1131	113.1	552.19	555.037					1131	113.1	367.476	352.254					1131	113.1	754.429	767.157					1131	113.1	886.762	875.045
1132	113.2	579.905	555.037					1132	113.2	351.286	352.254					1132	113.2	727.381	767.157					1132	113.2	800.952	728.573
1133	113.3	583.143	555.037					1133	113.3	420.381	431.117					1133	113.3	751.286	767.157					1133	113.3	712.048	728.573
1134	113.4	589.762	555.037					1134	113.4	425.429	431.117					1134	113.4	767.81	767.157					1134	113.4	770.619	728.573
1135	113.5	556.714	555.037					1135	113.5	466.762	431.117					1135	113.5	793.143	767.157					1135	113.5	716.048	728.573
1136	113.6	591	555.037					1136	113.6	428.619	431.117					1136	113.6	748.952	767.157					1136	113.6	691.381	728.573
1137	113.7	562.952	555.037					1137	113.7	459.667	431.117					1137	113.7	754.286	767.157					1137	113.7	732.286	728.573
1138	113.8	599.333	555.037					1138	113.8	363.857	352.254					1138	113.8	726.619	767.157					1138	113.8	704.857	728.573
1139	113.9	548.524	555.037					1139	113.9	346.619	352.254					1139	113.9	723.81	767.157					1139	113.9	732.714	728.573
1140	114	528.667	555.037					1140	114	345.429	352.254					1140	114	792.286	767.157					1140	114	645.667	728.573
1141	114.1	595.952	555.037					1141	114.1	353.238	352.254					1141	114.1	774.667	767.157					1141	114.1	733.81	728.573
1142	114.2	563.905	555.037					1142	114.2	424.667	431.117					1142	114.2	713.952	767.157					1142	114.2	717.476	728.573
1143	114.3	586.905	555.037					1143	114.3	451	431.117					1143	114.3	731.19	767.157					1143	114.3	776.81	728.573
1144	114.4	582.952	555.037					1144	114.4	414.429	431.117					1144	114.4	753.286	767.157					1144	114.4	713.048	728.573
1145	114.5	632.333	555.037					1145	114.5	427.095	431.117					1145	114.5	656.143	767.157					1145	114.5	821.143	728.573
1146	114.6	551.19	555.037					1146	114.6	444.095	431.117					1146	114.6	715.476	767.157					1146	114.6	794.762	728.573
1147	114.7	610.81	555.037					1147	114.7	485.619	431.117					1147	114.7	756.429	767.157					1147	114.7	744.667	728.573
1148	114.8	562.286	555.037					1148	114.8	437.095	431.117					1148	114.8	733.905	767.157					1148	114.8	739.476	728.573
1149	114.9	612.857	555.037					1149	114.9	434.143	431.117					1149	114.9	722.857	767.157					1149	114.9	752.667	728.573
1150	115	550.19	555.037					1150	115	437.524	431.117					1150	115	782.476	767.157					1150	115	733.667	728.573
1151	115.1	615.714	555.037					1151	115.1	441.571	431.117					1151	115.1	702.476	767.157					1151	115.1	646.429	728.573
1152	115.2	553.238	555.037					1152	115.2	468.095	431.117					1152	115.2	689.095	767.157					1152	115.2	732.81	728.573
1153	115.3	584	555.037					1153	115.3	439.81	431.117					1153	115.3	695.571	767.157					1153	115.3	709.619	728.573
1154	115.4	562.19	555.037					1154	115.4	433.667	431.117					1154	115.4	775.476	767.157					1154	115.4	823.81	728.573
1155	115.5	689.429	703.47					1155	115.5	475.381	504.122					1155	115.5	781.619	767.157					1155	115.5	820.048	728.573
1156	115.6	627.952	703.47					1156	115.6	516.048	504.122					1156	115.6	739.524	767.157					1156	115.6	730.714	728.573
1157	115.7	600.952	703.47					1157	115.7	461.571	504.122					1157	115.7	727.476	767.157					1157	115.7	760.952	728.573
1158	115.8	613.952	703.47					1158	115.8	451.905	504.122					1158	115.8	776.667	767.157					1158	115.8	692.619	728.573
1159	115.9	685.095	703.47					1159	115.9	459.667	504.122					1159	115.9	744.714	767.157					1159	115.9	734.143	728.573
1160	116	643.81	703.47					1160	116	536.524	504.122					1160	116	890.524	767.157					1160	116	734.286	728.573
1161	116.1	743.143	703.47					1161	116.1	511.667	504.122					1161	116.1	721.429	767.157					1161	116.1	746.619	728.573
1162	116.2	703.619	703.47					1162	116.2	520.667	504.122					1162	116.2	820.476	767.157					1162	116.2	743.238	728.573
1163	116.3	756.619	703.47					1163	116.3	511.048	504.122					1163	116.3	765	767.157					1163	116.3	747.524	728.573
1164	116.4	693.667	703.47					1164	116.4	492.238	504.122					1164	116.4	768.714	767.157					1164	116.4	693.857	728.573
1165	116.5	711.238	703.47					1165	116.5	490.143	504.122					1165	116.5	840.19	892.439					1165	116.5	716.571	728.573
1166	116.6	691.476	703.47					1166	116.6	480.857	504.122					1166	116.6	961.619	892.439					1166	116.6	712.19	728.573
1167	116.7	699.286	703.47					1167	116.7	498.048	504.122					1167	116.7	853.524	892.439					1167	116.7	759.381	728.573
1168	116.8	618.238	555.037					1168	116.8	473.476	504.122					1168	116.8	850.571	892.439					1168	116.8	675.571	728.573
1169	116.9	528.524	555.037					1169	116.9	441.238	504.122					1169	116.9	967.19	892.439					1169	116.9	661.667	615.657
1170	117	530.19	555.037					1170	117	427.524	504.122					1170	117	991.857	892.439					1170	117	624.429	615.657
1171	117.1	533.238	555.037					1171	117.1	453.143	504.122					1171	117.1	940.714	892.439					1171	117.1	524.619	615.657
1172	117.2	511.619	555.037					1172	117.2	501.524	504.122					1172	117.2	927.19	892.439					1172	117.2	561.857	615.657
1173	117.3	544.714	555.037					1173	117.3	559.905	504.122					1173	117.3	953.333	892.439					1173	117.3	581.571	615.657
1174	117.4	519.381	555.037					1174	117.4	555.143	504.122					1174	117.4	1030.95	892.439					1174	117.4	519.429	515.797
1175	117.5	483.286	555.037					1175	117.5	502.714	504.122					1175	117.5	934.857	892.439					1175	117.5	513.524	515.797
1176	117.6	530.381	555.037					1176	117.6	550.476	504.122					1176	117.6	844.286	892.439					1176	117.6	557.667	515.797
1177	117.7	599.286	555.037					1177	117.7	556.095	504.122					1177	117.7	708.286	892.439					1177	117.7	510.714	515.797
1178	117.8	690.238	703.47					1178	117.8	591.143	504.122					1178	117.8	725	892.439					1178	117.8	545.429	515.797
1179	117.9	652.905	703.47					1179	117.9	498.286	504.122					1179	117.9	828.571	892.439					1179	117.9	600.619	515.797
1180	118	667	703.47					1180	118	591.952	504.122					1180	118	924.667	892.439					1180	118	527.095	515.797
1181	118.1	694.619	703.47					1181	118.1	574.476	504.122					1181	118.1	938.476	892.439					1181	118.1	565.381	515.797
1182	118.2	667.095	703.47					1182	118.2	555.048	504.122					1182	118.2	1002.43	892.439					1182	118.2	518.381	515.797
1183	118.3	630.381	703.47					1183	118.3	554.524	504.122					1183	118.3	907.81	892.439					1183	118.3	557.905	515.797
1184	118.4	710.619	703.47					1184	118.4	464.524	504.122					1184	118.4	999.143	892.439					1184	118.4	544.714	515.797
1185	118.5	637.381	703.47					1185	118.5	441.333	504.122					1185	118.5	825.619	892.439					1185	118.5	536.857	515.797
1186	118.6	541.143	555.037					1186	118.6	528.095	504.122					1186	118.6	870.286	892.439					1186	118.6	576.81	615.657
1187	118.7	730.524	703.47					1187	118.7	430.143	504.122					1187	118.7	914.143	892.439					1187	118.7	610.143	615.657
1188	118.8	740.381	703.47					1188	118.8	515.286	504.122					1188	118.8	1069.14	892.439					1188	118.8	576.476	615.657
1189	118.9	746.524	703.47					1189	118.9	496.571	504.122					1189	118.9	991.19	892.439					1189	118.9	597.952	615.657
1190	119	760.524	703.47					1190	119	575.762	591.48					1190	119	1101.52	892.439					1190	119	582.952	615.657
1191	119.1	648.857	703.47					1191	119.1	744.952	591.48					1191	119.1	1035.67	892.439					1191	119.1	617.381	615.657
1192	119.2	713.429	703.47					1192	119.2	556.476	591.48					1192	119.2	987.238	892.439					1192	119.2	658.143	615.657
1193	119.3	643	703.47					1193	119.3	542.571	591.48					1193	119.3	950.476	892.439					1193	119.3	630.476	615.657
1194	119.4	533.571	555.037					1194	119.4	611.667	591.48					1194	119.4	989.143	892.439					1194	119.4	629.667	615.657
1195	119.5	541	555.037					1195	119.5	597.476	591.48					1195	119.5	896.381	892.439					1195	119.5	633.81	615.657
1196	119.6	608.714	555.037					1196	119.6	629.381	591.48					1196	119.6	808.857	767.157					1196	119.6	631.952	615.657
1197	119.7	535.238	555.037					1197	119.7	537.952	591.48					1197	119.7	773.952	767.157					1197	119.7	675.952	728.573
1198	119.8	550.857	555.037					1198	119.8	598.952	591.48					1198	119.8	786.286	767.157					1198	119.8	736.857	728.573
1199	119.9	500.143	555.037					1199	119.9	637.762	591.48					1199	119.9	863.619	767.157					1199	119.9	754.429	728.573
1200	120	557.429	555.037					1200	120	644.143	591.48					1200	120	887.952	767.157					1200	120	802.619	728.573
1201	120.1	557.429	555.037					1201	120.1	675.714	591.48					1201	120.1	791.476	767.157					1201	120.1	754.667	728.573
1202	120.2	547.476	555.037					1202	120.2	600.952	591.48					1202	120.2	801.714	767.157					1202	120.2	708.952	728.573
1203	120.3	519.286	555.037					1203	120.3	490.19	504.122					1203	120.3	756.905	767.157					1203	120.3	696.619	728.573
1204	120.4	555.238	555.037					1204	120.4	472.429	504.122					1204	120.4	760.571	767.157					1204	120.4	742.19	728.573
1205	120.5	533.571	555.037					1205	120.5	520.143	504.122					1205	120.5	822.476	767.157					1205	120.5	637.714	615.657
1206	120.6	563.762	555.037					1206	120.6	555.905	504.122					1206	120.6	830.524	767.157					1206	120.6	601.381	615.657
1207	120.7	589.762	555.037					1207	120.7	531	504.122					1207	120.7	834.238	767.157					1207	120.7	625.714	615.657
1208	120.8	519.19	555.037					1208	120.8	538.857	504.122					1208	120.8	724.048	767.157					1208	120.8	638.286	615.657
1209	120.9	592.81	555.037					1209	120.9	575.333	504.122					1209	120.9	744.143	767.157					1209	120.9	659.667	615.657
1210	121	577.857	555.037					1210	121	495.238	504.122					1210	121	818.571	767.157					1210	121	673.905	615.657
1211	121.1	525.857	555.037					1211	121.1	524	504.122					1211	121.1	750.143	767.157					1211	121.1	634.905	615.657
1212	121.2	604.667	555.037					1212	121.2	573.762	504.122					1212	121.2	774.19	767.157					1212	121.2	591.667	615.657
1213	121.3	670.286	703.47					1213	121.3	520.19	504.122					1213	121.3	769.143	767.157					1213	121.3	692.429	615.657
1214	121.4	729.476	703.47					1214	121.4	564.81	591.48					1214	121.4	689.571	767.157					1214	121.4	621.667	615.657
1215	121.5	661.381	703.47					1215	121.5	545.571	591.48					1215	121.5	714	767.157					1215	121.5	675.952	615.657
1216	121.6	731.095	703.47					1216	121.6	567.619	591.48					1216	121.6	691.81	767.157					1216	121.6	647.524	615.657
1217	121.7	679.571	703.47					1217	121.7	594.857	591.48					1217	121.7	741.952	767.157					1217	121.7	681.762	615.657
1218	121.8	657.286	703.47					1218	121.8	564.619	591.48					1218	121.8	780.048	767.157					1218	121.8	626.048	615.657
1219	121.9	691.095	703.47					1219	121.9	541.095	591.48					1219	121.9	708.143	767.157					1219	121.9	655.762	615.657
1220	122	742.048	703.47					1220	122	557.857	591.48					1220	122	871.952	767.157					1220	122	669.286	728.573
1221	122.1	657.429	703.47					1221	122.1	566.81	591.48					1221	122.1	848.19	767.157					1221	122.1	666.952	728.573
1222	122.2	610.619	703.47					1222	122.2	662.429	591.48					1222	122.2	739.762	767.157					1222	122.2	668.762	728.573
1223	122.3	719.476	703.47					1223	122.3	590.286	591.48					1223	122.3	870.952	767.157					1223	122.3	682.571	728.573
1224	122.4	719.619	703.47					1224	122.4	623	591.48					1224	122.4	701.048	657.245					1224	122.4	672.095	728.573
1225	122.5	703.238	703.47					1225	122.5	620.762	591.48					1225	122.5	724.952	657.245					1225	122.5	678.143	728.573
1226	122.6	676.714	703.47					1226	122.6	716.619	591.48					1226	122.6	700.143	657.245					1226	122.6	730.524	728.573
1227	122.7	759.857	703.47					1227	122.7	627.81	591.48					1227	122.7	726.762	657.245					1227	122.7	819.19	728.573
1228	122.8	705.762	703.47					1228	122.8	622.571	591.48					1228	122.8	714.714	657.245					1228	122.8	754.19	728.573
1229	122.9	733.286	703.47					1229	122.9	650.714	591.48					1229	122.9	727.286	657.245					1229	122.9	744.048	728.573
1230	123	703.333	703.47					1230	123	628.714	591.48					1230	123	666.238	657.245					1230	123	771.19	728.573
1231	123.1	675.571	703.47					1231	123.1	755.905	716.358					1231	123.1	600.19	561.395					1231	123.1	706.429	728.573
1232	123.2	699.286	703.47					1232	123.2	674.238	716.358					1232	123.2	579.905	561.395					1232	123.2	750.048	728.573
1233	123.3	686.857	703.47					1233	123.3	615.429	591.48					1233	123.3	571.571	561.395					1233	123.3	798.714	728.573
1234	123.4	630.571	703.47					1234	123.4	594.714	591.48					1234	123.4	607.667	561.395					1234	123.4	775.19	728.573
1235	123.5	682.952	703.47					1235	123.5	667.905	591.48					1235	123.5	514.905	561.395					1235	123.5	764.333	728.573
1236	123.6	658.238	703.47					1236	123.6	568	591.48					1236	123.6	590.238	561.395					1236	123.6	816	728.573
1237	123.7	644.381	703.47					1237	123.7	603	591.48					1237	123.7	583.429	561.395					1237	123.7	765.333	728.573
1238	123.8	670.333	703.47					1238	123.8	625.857	591.48					1238	123.8	561.333	561.395					1238	123.8	785.524	728.573
1239	123.9	707.095	703.47					1239	123.9	614.762	591.48					1239	123.9	561.333	561.395					1239	123.9	777.762	728.573
1240	124	723.81	703.47					1240	124	603.905	591.48					1240	124	602.333	561.395					1240	124	782.333	728.573
1241	124.1	721.429	703.47					1241	124.1	647.524	591.48					1241	124.1	552.714	561.395					1241	124.1	720.333	728.573
1242	124.2	701	703.47					1242	124.2	475.429	504.122					1242	124.2	620.429	657.245					1242	124.2	819.762	728.573
1243	124.3	726.286	703.47					1243	124.3	568.048	504.122					1243	124.3	703.476	657.245					1243	124.3	713.048	728.573
1244	124.4	716.381	703.47					1244	124.4	510.81	504.122					1244	124.4	722	657.245					1244	124.4	825.286	728.573
1245	124.5	518.905	555.037					1245	124.5	503.571	504.122					1245	124.5	673.952	657.245					1245	124.5	714.857	728.573
1246	124.6	577.667	555.037					1246	124.6	521.286	504.122					1246	124.6	610.095	657.245					1246	124.6	835.048	875.045
1247	124.7	529.952	555.037					1247	124.7	547.667	504.122					1247	124.7	575.905	561.395					1247	124.7	927.238	875.045
1248	124.8	546.619	555.037					1248	124.8	550.619	504.122					1248	124.8	550.952	561.395					1248	124.8	836.143	875.045
1249	124.9	574.524	555.037					1249	124.9	518.857	504.122					1249	124.9	591.143	561.395					1249	124.9	934.143	875.045
1250	125	547.238	555.037					1250	125	509.905	504.122					1250	125	560	561.395					1250	125	861.286	875.045
1251	125.1	548.952	555.037					1251	125.1	528.429	504.122					1251	125.1	669.524	657.245					1251	125.1	822.19	875.045
1252	125.2	588.571	555.037					1252	125.2	566.905	504.122					1252	125.2	632.524	657.245					1252	125.2	750	728.573
1253	125.3	594.905	555.037					1253	125.3	540.476	504.122					1253	125.3	574.333	657.245					1253	125.3	815.667	728.573
1254	125.4	572.81	555.037					1254	125.4	544.571	504.122					1254	125.4	671	657.245					1254	125.4	825.286	728.573
1255	125.5	586.667	555.037					1255	125.5	516.714	504.122					1255	125.5	579.857	657.245					1255	125.5	811.714	728.573
1256	125.6	548.619	555.037					1256	125.6	578.762	504.122					1256	125.6	610.333	657.245					1256	125.6	808.762	728.573
1257	125.7	519.762	555.037					1257	125.7	583.619	504.122					1257	125.7	612.286	657.245					1257	125.7	766.81	728.573
1258	125.8	555.333	555.037					1258	125.8	586.381	504.122					1258	125.8	630	657.245					1258	125.8	807.905	728.573
1259	125.9	522.19	555.037					1259	125.9	542	504.122					1259	125.9	609.476	657.245					1259	125.9	703.143	728.573
1260	126	580.429	555.037					1260	126	450.762	431.117					1260	126	614.81	657.245					1260	126	720.095	728.573
1261	126.1	471.333	408.832					1261	126.1	429.381	431.117					1261	126.1	643.524	657.245					1261	126.1	749.762	728.573
1262	126.2	409.19	408.832					1262	126.2	434.095	431.117					1262	126.2	632.476	657.245					1262	126.2	711.381	728.573
1263	126.3	414.952	408.832					1263	126.3	415.095	431.117					1263	126.3	586.095	657.245					1263	126.3	755.667	728.573
1264	126.4	385.286	408.832					1264	126.4	426.333	431.117					1264	126.4	653.238	657.245					1264	126.4	788.19	728.573
1265	126.5	440.286	408.832					1265	126.5	439	431.117					1265	126.5	638.381	657.245					1265	126.5	745.714	728.573
1266	126.6	364.048	408.832					1266	126.6	413.19	431.117					1266	126.6	619.381	657.245					1266	126.6	838.619	728.573
1267	126.7	401.619	408.832					1267	126.7	412.143	431.117					1267	126.7	622.571	657.245					1267	126.7	803.571	728.573
1268	126.8	428.857	408.832					1268	126.8	447.905	431.117					1268	126.8	604.81	657.245					1268	126.8	712	728.573
1269	126.9	361.381	408.832					1269	126.9	426.524	431.117					1269	126.9	655.571	657.245					1269	126.9	700.238	728.573
1270	127	385.857	408.832					1270	127	453.952	431.117					1270	127	632.952	657.245					1270	127	703.048	728.573
1271	127.1	373.905	408.832					1271	127.1	453.952	431.117					1271	127.1	528.81	561.395					1271	127.1	654.571	728.573
1272	127.2	398.286	408.832					1272	127.2	405.381	431.117					1272	127.2	498.81	561.395					1272	127.2	753.476	728.573
1273	127.3	366.952	408.832					1273	127.3	405.19	431.117					1273	127.3	470.714	561.395					1273	127.3	696.333	728.573
1274	127.4	402.571	408.832					1274	127.4	433.238	431.117					1274	127.4	522.381	561.395					1274	127.4	692.381	728.573
1275	127.5	395.333	408.832					1275	127.5	457.476	431.117					1275	127.5	535.81	561.395					1275	127.5	662.905	728.573
1276	127.6	404.095	408.832					1276	127.6	490.048	504.122					1276	127.6	569.19	561.395					1276	127.6	662.381	728.573
1277	127.7	400.286	408.832					1277	127.7	522.143	504.122					1277	127.7	636.381	657.245					1277	127.7	730.143	728.573
1278	127.8	408.619	408.832					1278	127.8	459	504.122					1278	127.8	726.333	657.245					1278	127.8	840.952	728.573
1279	127.9	394.381	408.832					1279	127.9	490.667	504.122					1279	127.9	637.952	657.245					1279	127.9	795.095	728.573
1280	128	426.762	408.832					1280	128	580.524	591.48					1280	128	768.333	657.245					1280	128	759.143	728.573
1281	128.1	438.381	408.832					1281	128.1	674.762	591.48					1281	128.1	732.143	657.245					1281	128.1	692.476	728.573
1282	128.2	545.762	555.037					1282	128.2	640.762	591.48					1282	128.2	746	657.245					1282	128.2	709.429	728.573
1283	128.3	504.333	555.037					1283	128.3	633.429	591.48					1283	128.3	702.905	657.245					1283	128.3	736.667	728.573
1284	128.4	579.19	555.037					1284	128.4	623.952	591.48					1284	128.4	683	657.245					1284	128.4	818.857	728.573
1285	128.5	530.429	555.037					1285	128.5	571.667	591.48					1285	128.5	676.143	657.245					1285	128.5	701.619	728.573
1286	128.6	572.19	555.037					1286	128.6	575.143	591.48					1286	128.6	680.905	657.245					1286	128.6	710.667	728.573
1287	128.7	503.048	555.037					1287	128.7	586.619	591.48					1287	128.7	719.381	657.245					1287	128.7	753.095	728.573
1288	128.8	545.667	555.037					1288	128.8	573.048	591.48					1288	128.8	711.429	657.245					1288	128.8	751.571	728.573
1289	128.9	608.905	555.037					1289	128.9	607.429	591.48					1289	128.9	801.667	657.245					1289	128.9	694.619	728.573
1290	129	549.476	555.037					1290	129	687.048	591.48					1290	129	727.333	657.245					1290	129	729.619	728.573
1291	129.1	523.524	555.037					1291	129.1	585.905	591.48					1291	129.1	723.476	657.245					1291	129.1	683.762	728.573
1292	129.2	628.952	555.037					1292	129.2	586.333	591.48					1292	129.2	699.143	657.245					1292	129.2	592.762	615.657
1293	129.3	569.571	555.037					1293	129.3	578	591.48					1293	129.3	685.476	657.245					1293	129.3	537.095	615.657
1294	129.4	538.905	555.037					1294	129.4	549.095	591.48					1294	129.4	726.381	657.245					1294	129.4	597.095	615.657
1295	129.5	570	555.037					1295	129.5	639.714	591.48					1295	129.5	725.19	657.245					1295	129.5	603.19	615.657
1296	129.6	615.524	555.037					1296	129.6	623.19	591.48					1296	129.6	695.619	657.245					1296	129.6	572.476	615.657
1297	129.7	547.143	555.037					1297	129.7	572.429	591.48					1297	129.7	631.619	657.245					1297	129.7	544.667	615.657
1298	129.8	554.857	555.037					1298	129.8	749.619	716.358					1298	129.8	674.667	657.245					1298	129.8	570.381	615.657
1299	129.9	562.476	555.037					1299	129.9	678.905	716.358					1299	129.9	712.762	657.245					1299	129.9	560.905	615.657
1300	130	592.19	555.037					1300	130	558.857	591.48					1300	130	679.524	657.245					1300	130	589.476	615.657
1301	130.1	530.571	555.037					1301	130.1	547.857	591.48					1301	130.1	799.095	767.157					1301	130.1	541.762	515.797
1302	130.2	541.619	555.037					1302	130.2	496.762	591.48					1302	130.2	738.381	767.157					1302	130.2	552.857	515.797
1303	130.3	607.571	555.037					1303	130.3	563.524	591.48					1303	130.3	755.476	767.157					1303	130.3	498.857	515.797
1304	130.4	661.524	703.47					1304	130.4	547.952	591.48					1304	130.4	702.095	767.157					1304	130.4	582.381	515.797
1305	130.5	719.238	703.47					1305	130.5	545.905	591.48					1305	130.5	722.095	767.157					1305	130.5	509.81	515.797
1306	130.6	707	703.47					1306	130.6	608.381	591.48					1306	130.6	712.381	767.157					1306	130.6	601.095	515.797
1307	130.7	604.952	703.47					1307	130.7	516.19	591.48					1307	130.7	719.286	767.157					1307	130.7	562.238	515.797
1308	130.8	788.667	703.47					1308	130.8	531.381	591.48					1308	130.8	776	767.157					1308	130.8	555.524	515.797
1309	130.9	738.19	703.47					1309	130.9	535.095	591.48					1309	130.9	605.095	657.245					1309	130.9	547.857	515.797
1310	131	689.762	703.47					1310	131	525.667	591.48					1310	131	569.571	657.245					1310	131	526.19	515.797
1311	131.1	769.333	703.47					1311	131.1	614.571	591.48					1311	131.1	593.619	657.245					1311	131.1	558.333	515.797
1312	131.2	664.19	703.47					1312	131.2	537.429	591.48					1312	131.2	617.952	657.245					1312	131.2	514.857	515.797
1313	131.3	668.81	703.47					1313	131.3	520.286	591.48					1313	131.3	607.095	657.245					1313	131.3	533.81	515.797
1314	131.4	677.762	703.47					1314	131.4	585.333	591.48					1314	131.4	572.762	657.245					1314	131.4	536.714	515.797
1315	131.5	725.714	703.47					1315	131.5	562.81	591.48					1315	131.5	672.286	657.245					1315	131.5	528.286	515.797
1316	131.6	703.19	703.47					1316	131.6	516.714	591.48					1316	131.6	651.762	657.245					1316	131.6	465.81	515.797
1317	131.7	674.286	703.47					1317	131.7	581.714	591.48					1317	131.7	569.524	657.245					1317	131.7	573.571	615.657
1318	131.8	755.143	703.47					1318	131.8	495.19	504.122					1318	131.8	613.714	657.245					1318	131.8	562.81	615.657
1319	131.9	668.81	703.47					1319	131.9	475.381	504.122					1319	131.9	575.429	657.245					1319	131.9	561.762	615.657
1320	132	720.667	703.47					1320	132	515.095	504.122					1320	132	605.571	657.245					1320	132	681.333	615.657
1321	132.1	667.952	703.47					1321	132.1	525.952	504.122					1321	132.1	598.381	657.245					1321	132.1	573.095	615.657
1322	132.2	718.714	703.47					1322	132.2	450.571	431.117					1322	132.2	755.571	657.245					1322	132.2	626.476	615.657
1323	132.3	720.429	703.47					1323	132.3	431.095	431.117					1323	132.3	698.524	657.245					1323	132.3	586.286	615.657
1324	132.4	684.619	703.47					1324	132.4	416.19	431.117					1324	132.4	737.619	657.245					1324	132.4	582.571	615.657
1325	132.5	723.143	703.47					1325	132.5	436.619	431.117					1325	132.5	671.667	657.245					1325	132.5	611.19	615.657
1326	132.6	745.048	703.47					1326	132.6	406.143	431.117					1326	132.6	729.286	657.245					1326	132.6	570.619	615.657
1327	132.7	661.095	703.47					1327	132.7	418.048	431.117					1327	132.7	686.667	657.245					1327	132.7	565.286	615.657
1328	132.8	722	703.47					1328	132.8	439.667	431.117					1328	132.8	688.905	657.245					1328	132.8	586.429	615.657
1329	132.9	695	703.47					1329	132.9	428.762	431.117					1329	132.9	704.905	657.245					1329	132.9	566.762	615.657
1330	133	731.286	703.47					1330	133	422.286	431.117					1330	133	846.952	767.157					1330	133	563.571	615.657
1331	133.1	498.19	555.037					1331	133.1	348.619	352.254					1331	133.1	825.476	767.157					1331	133.1	564.905	615.657
1332	133.2	454.571	408.832					1332	133.2	342.333	352.254					1332	133.2	794.333	767.157					1332	133.2	593.476	615.657
1333	133.3	422.238	408.832					1333	133.3	369.667	352.254					1333	133.3	736	767.157					1333	133.3	573.333	615.657
1334	133.4	411.143	408.832					1334	133.4	321.571	352.254					1334	133.4	786.667	767.157					1334	133.4	574.286	615.657
1335	133.5	392.762	408.832					1335	133.5	341	352.254					1335	133.5	693.667	767.157					1335	133.5	534.952	515.797
1336	133.6	387.667	408.832					1336	133.6	360.238	352.254					1336	133.6	813.238	767.157					1336	133.6	551.857	515.797
1337	133.7	486.19	408.832					1337	133.7	351.238	352.254					1337	133.7	745.81	767.157					1337	133.7	541.476	515.797
1338	133.8	416	408.832					1338	133.8	370	352.254					1338	133.8	724.476	767.157					1338	133.8	534.667	515.797
1339	133.9	430.81	408.832					1339	133.9	347.857	352.254					1339	133.9	687.476	767.157					1339	133.9	542.667	515.797
1340	134	609.381	555.037					1340	134	356.286	352.254					1340	134	859.857	767.157					1340	134	512.905	515.797
1341	134.1	657.429	555.037					1341	134.1	338.952	352.254					1341	134.1	903.714	767.157					1341	134.1	545.333	515.797
1342	134.2	405.619	408.832					1342	134.2	392.81	431.117					1342	134.2	782.81	767.157					1342	134.2	480.429	515.797
1343	134.3	391	408.832					1343	134.3	439.857	431.117					1343	134.3	797.905	767.157					1343	134.3	475.81	515.797
1344	134.4	391.429	408.832					1344	134.4	460.381	431.117					1344	134.4	745.095	767.157					1344	134.4	518.571	515.797
1345	134.5	453.048	408.832					1345	134.5	489.429	431.117					1345	134.5	770.81	767.157					1345	134.5	546.81	515.797
1346	134.6	462	408.832					1346	134.6	437.524	431.117					1346	134.6	727.667	767.157					1346	134.6	481.333	515.797
1347	134.7	602.429	555.037					1347	134.7	407.381	431.117					1347	134.7	767.905	767.157					1347	134.7	514.81	515.797
1348	134.8	767.81	703.47					1348	134.8	482.81	431.117					1348	134.8	769.667	767.157					1348	134.8	457.476	515.797
1349	134.9	719.048	703.47					1349	134.9	440.714	431.117					1349	134.9	663.905	767.157					1349	134.9	499.238	515.797
1350	135	705.952	703.47					1350	135	468.286	431.117					1350	135	755.476	767.157					1350	135	474.19	515.797
1351	135.1	744.524	703.47					1351	135.1	450.857	431.117					1351	135.1	789	767.157					1351	135.1	485.429	515.797
1352	135.2	743.048	703.47					1352	135.2	440.238	431.117					1352	135.2	703.476	767.157					1352	135.2	461.286	515.797
1353	135.3	785.381	703.47					1353	135.3	422.381	431.117					1353	135.3	680.048	767.157					1353	135.3	547.429	515.797
1354	135.4	692.667	703.47					1354	135.4	431.381	431.117					1354	135.4	686.048	767.157					1354	135.4	592.762	515.797
1355	135.5	596.238	555.037					1355	135.5	432.762	431.117					1355	135.5	692.762	767.157					1355	135.5	581.714	515.797
1356	135.6	624.81	555.037					1356	135.6	462.762	431.117					1356	135.6	722.381	767.157					1356	135.6	491.857	515.797
1357	135.7	541.762	555.037					1357	135.7	387.857	431.117					1357	135.7	753	767.157					1357	135.7	534.619	515.797
1358	135.8	417.19	408.832					1358	135.8	410.667	431.117					1358	135.8	712.667	767.157					1358	135.8	527.143	515.797
1359	135.9	405.048	408.832					1359	135.9	400	431.117					1359	135.9	708.667	767.157					1359	135.9	562.571	515.797
1360	136	411.762	408.832					1360	136	424.714	431.117					1360	136	761.857	767.157					1360	136	460.333	515.797
1361	136.1	416.238	408.832					1361	136.1	450.714	431.117					1361	136.1	698.286	767.157					1361	136.1	473.238	515.797
1362	136.2	418.762	408.832					1362	136.2	430.286	431.117					1362	136.2	677.429	767.157					1362	136.2	493.238	515.797
1363	136.3	384.619	408.832					1363	136.3	441.857	431.117					1363	136.3	766.524	767.157					1363	136.3	473.19	515.797
1364	136.4	390.238	408.832					1364	136.4	431	431.117					1364	136.4	807.524	767.157					1364	136.4	456.524	515.797
1365	136.5	399.81	408.832					1365	136.5	444.905	431.117					1365	136.5	766.524	767.157					1365	136.5	466.476	515.797
1366	136.6	428.048	408.832					1366	136.6	425.81	431.117					1366	136.6	714.238	767.157					1366	136.6	472.048	515.797
1367	136.7	552.143	555.037					1367	136.7	448.81	431.117					1367	136.7	815.238	767.157					1367	136.7	468.095	515.797
1368	136.8	571.571	555.037					1368	136.8	448.286	431.117					1368	136.8	793	767.157					1368	136.8	464.667	515.797
1369	136.9	548.095	555.037					1369	136.9	439.857	431.117					1369	136.9	810.952	767.157					1369	136.9	465.524	515.797
1370	137	593.667	555.037					1370	137	440.762	431.117					1370	137	828.571	767.157					1370	137	629.19	615.657
1371	137.1	593.333	555.037					1371	137.1	459.095	431.117					1371	137.1	710.571	767.157					1371	137.1	550.238	515.797
1372	137.2	606.571	555.037					1372	137.2	455.429	431.117					1372	137.2	747.143	767.157					1372	137.2	560.429	515.797
1373	137.3	616.476	555.037					1373	137.3	460.048	431.117					1373	137.3	722.333	767.157					1373	137.3	551.476	515.797
1374	137.4	594.81	555.037					1374	137.4	437.524	431.117					1374	137.4	753.048	767.157					1374	137.4	555.143	515.797
1375	137.5	576.048	555.037					1375	137.5	441.143	431.117					1375	137.5	731.048	767.157					1375	137.5	525.524	515.797
1376	137.6	575.19	555.037					1376	137.6	581.667	591.48					1376	137.6	588.238	657.245					1376	137.6	533.095	515.797
1377	137.7	632.571	703.47					1377	137.7	594.476	591.48					1377	137.7	574.952	657.245					1377	137.7	555.429	515.797
1378	137.8	722.381	703.47					1378	137.8	626.905	591.48					1378	137.8	660.238	657.245					1378	137.8	564.19	515.797
1379	137.9	644.19	703.47					1379	137.9	616.238	591.48					1379	137.9	583.524	561.395					1379	137.9	527.667	515.797
1380	138	786.238	703.47					1380	138	537.143	591.48					1380	138	532.667	561.395					1380	138	526.81	515.797
1381	138.1	776.048	703.47					1381	138.1	609	591.48					1381	138.1	629.857	561.395					1381	138.1	529.762	515.797
1382	138.2	745	703.47					1382	138.2	616.238	591.48					1382	138.2	590.143	561.395					1382	138.2	534.714	515.797
1383	138.3	743	703.47					1383	138.3	582.048	591.48					1383	138.3	605.095	561.395					1383	138.3	517.238	515.797
1384	138.4	726.333	703.47					1384	138.4	652.524	591.48					1384	138.4	643.429	561.395					1384	138.4	512.19	515.797
1385	138.5	750.286	703.47					1385	138.5	610.095	591.48					1385	138.5	585	561.395					1385	138.5	514.857	515.797
1386	138.6	749.143	703.47					1386	138.6	590.524	591.48					1386	138.6	532.571	561.395					1386	138.6	518.667	515.797
1387	138.7	671.857	703.47					1387	138.7	560.667	591.48					1387	138.7	632.81	561.395					1387	138.7	537.333	515.797
1388	138.8	751.905	703.47					1388	138.8	594.857	591.48					1388	138.8	557.095	561.395					1388	138.8	575.048	515.797
1389	138.9	761.143	703.47					1389	138.9	584.476	591.48					1389	138.9	534.524	561.395					1389	138.9	578.714	515.797
1390	139	831.429	703.47					1390	139	613.857	591.48					1390	139	609.19	561.395					1390	139	585.238	515.797
1391	139.1	757.286	703.47					1391	139.1	628.381	591.48					1391	139.1	582.905	561.395					1391	139.1	538.619	515.797
1392	139.2	750.619	703.47					1392	139.2	554.952	591.48					1392	139.2	528.333	561.395					1392	139.2	550.048	515.797
1393	139.3	788.619	703.47					1393	139.3	504.095	504.122					1393	139.3	583.952	561.395					1393	139.3	530.905	515.797
1394	139.4	695	703.47					1394	139.4	543.048	504.122					1394	139.4	533.524	561.395					1394	139.4	526.095	515.797
1395	139.5	703.286	703.47					1395	139.5	526	504.122					1395	139.5	597.619	561.395					1395	139.5	400.952	424.282
1396	139.6	700.286	703.47					1396	139.6	418.238	504.122					1396	139.6	560.476	561.395					1396	139.6	464.476	424.282
1397	139.7	768.19	837.182					1397	139.7	499.381	504.122					1397	139.7	593.476	561.395					1397	139.7	522	515.797
1398	139.8	825.714	837.182					1398	139.8	454.095	504.122					1398	139.8	585.81	561.395					1398	139.8	491.81	515.797
1399	139.9	780	837.182					1399	139.9	514.667	504.122					1399	139.9	577	561.395					1399	139.9	457.381	515.797
1400	140	756.524	837.182					1400	140	525.714	504.122					1400	140	589.476	561.395					1400	140	478.667	515.797
1401	140.1	763.333	837.182					1401	140.1	512.048	504.122					1401	140.1	608.667	561.395					1401	140.1	483.333	515.797
1402	140.2	765.524	837.182					1402	140.2	523.524	504.122					1402	140.2	555.524	561.395					1402	140.2	486.667	515.797
1403	140.3	810.571	837.182					1403	140.3	558	504.122					1403	140.3	604	561.395					1403	140.3	460.81	515.797
1404	140.4	908.81	837.182					1404	140.4	527.286	504.122					1404	140.4	586.857	561.395					1404	140.4	504.286	515.797
1405	140.5	896.143	837.182					1405	140.5	551.524	504.122					1405	140.5	582.524	561.395					1405	140.5	461.143	515.797
1406	140.6	881.095	837.182					1406	140.6	556.762	504.122					1406	140.6	572.667	561.395					1406	140.6	472.333	515.797
1407	140.7	747.571	703.47					1407	140.7	495.667	504.122					1407	140.7	574.095	561.395					1407	140.7	507.714	515.797
1408	140.8	771.095	703.47					1408	140.8	536.524	504.122					1408	140.8	585.762	561.395					1408	140.8	576.762	515.797
1409	140.9	619.905	703.47					1409	140.9	540.333	504.122					1409	140.9	559.381	561.395					1409	140.9	515.524	515.797
1410	141	669.905	703.47					1410	141	554.429	591.48					1410	141	636.714	561.395					1410	141	520.286	515.797
1411	141.1	716.667	703.47					1411	141.1	614.048	591.48					1411	141.1	576.238	561.395					1411	141.1	488.905	515.797
1412	141.2	707.238	703.47					1412	141.2	556.333	591.48					1412	141.2	565.143	561.395					1412	141.2	435.095	515.797
1413	141.3	749.905	703.47					1413	141.3	582.762	591.48					1413	141.3	567.095	561.395					1413	141.3	460.286	515.797
1414	141.4	754.476	703.47					1414	141.4	531.619	591.48					1414	141.4	568.714	561.395					1414	141.4	457.333	515.797
1415	141.5	715.238	703.47					1415	141.5	513.048	591.48					1415	141.5	599.81	561.395					1415	141.5	509.714	515.797
1416	141.6	733.524	703.47					1416	141.6	569.524	591.48					1416	141.6	578.714	561.395					1416	141.6	521.524	515.797
1417	141.7	723.048	703.47					1417	141.7	607.571	591.48					1417	141.7	712.476	657.245					1417	141.7	445.286	515.797
1418	141.8	750.048	703.47					1418	141.8	579.429	591.48					1418	141.8	590.667	657.245					1418	141.8	513.524	515.797
1419	141.9	757.19	703.47					1419	141.9	535.571	504.122					1419	141.9	723.286	657.245					1419	141.9	512.857	515.797
1420	142	754.381	703.47					1420	142	554.762	504.122					1420	142	633.857	657.245					1420	142	495.762	515.797
1421	142.1	723.095	703.47					1421	142.1	527.19	504.122					1421	142.1	643.571	657.245					1421	142.1	512.19	515.797
1422	142.2	690.524	703.47					1422	142.2	445.667	504.122					1422	142.2	661.143	657.245					1422	142.2	515.429	515.797
1423	142.3	728.571	703.47					1423	142.3	488.19	504.122					1423	142.3	607.095	657.245					1423	142.3	476.524	515.797
1424	142.4	764.571	703.47					1424	142.4	466.143	504.122					1424	142.4	649.19	657.245					1424	142.4	527.333	515.797
1425	142.5	772.286	703.47					1425	142.5	417.714	431.117					1425	142.5	631.571	657.245					1425	142.5	513.048	515.797
1426	142.6	773.857	703.47					1426	142.6	427.095	431.117					1426	142.6	566.476	657.245					1426	142.6	485.905	515.797
1427	142.7	738.619	703.47					1427	142.7	452.19	431.117					1427	142.7	626.762	657.245					1427	142.7	461.476	515.797
1428	142.8	730.429	703.47					1428	142.8	426.81	431.117					1428	142.8	631.19	657.245					1428	142.8	440.048	515.797
1429	142.9	741.571	703.47					1429	142.9	432.571	431.117					1429	142.9	639.571	657.245					1429	142.9	492.905	515.797
1430	143	738.429	703.47					1430	143	465.238	504.122					1430	143	594	657.245					1430	143	469	515.797
1431	143.1	720.429	703.47					1431	143.1	528.619	504.122					1431	143.1	707.619	657.245					1431	143.1	513.238	515.797
1432	143.2	750.905	703.47					1432	143.2	567.524	504.122					1432	143.2	593.714	657.245					1432	143.2	462.143	515.797
1433	143.3	875.714	837.182					1433	143.3	575.714	504.122					1433	143.3	670.238	657.245					1433	143.3	517.476	515.797
1434	143.4	727.524	703.47					1434	143.4	474.238	504.122					1434	143.4	583.714	657.245					1434	143.4	475.524	515.797
1435	143.5	745.429	703.47					1435	143.5	391.667	431.117					1435	143.5	607.762	657.245					1435	143.5	448	515.797
1436	143.6	730.19	703.47					1436	143.6	445	431.117					1436	143.6	633.619	657.245					1436	143.6	471.143	515.797
1437	143.7	742	703.47					1437	143.7	439.905	431.117					1437	143.7	608.952	657.245					1437	143.7	446	515.797
1438	143.8	696.762	703.47					1438	143.8	418.286	431.117					1438	143.8	566.857	561.395					1438	143.8	515.81	515.797
1439	143.9	753.524	703.47					1439	143.9	444.619	431.117					1439	143.9	558.952	561.395					1439	143.9	461.095	515.797
1440	144	698.857	703.47					1440	144	503.762	431.117					1440	144	600.857	561.395					1440	144	480.714	515.797
1441	144.1	725.381	703.47					1441	144.1	481.571	431.117					1441	144.1	640.333	561.395					1441	144.1	490.524	515.797
1442	144.2	680.19	703.47					1442	144.2	456.381	431.117					1442	144.2	614.81	561.395					1442	144.2	429.381	515.797
1443	144.3	759.333	703.47					1443	144.3	420.143	431.117					1443	144.3	601.81	561.395					1443	144.3	530.476	515.797
1444	144.4	741.19	703.47					1444	144.4	486.429	431.117					1444	144.4	580.952	561.395					1444	144.4	453.095	515.797
1445	144.5	715.619	703.47					1445	144.5	398.952	431.117					1445	144.5	604.333	561.395					1445	144.5	476.667	515.797
1446	144.6	697.286	703.47					1446	144.6	328.048	352.254					1446	144.6	606.619	561.395					1446	144.6	546.714	515.797
1447	144.7	710.905	703.47					1447	144.7	388.619	352.254					1447	144.7	569.476	561.395					1447	144.7	495.619	515.797
1448	144.8	752.524	703.47					1448	144.8	365.952	352.254					1448	144.8	601.667	561.395					1448	144.8	459.238	515.797
1449	144.9	782.19	703.47					1449	144.9	367.714	352.254					1449	144.9	567.571	561.395					1449	144.9	517.524	515.797
1450	145	765.048	703.47					1450	145	356.571	352.254					1450	145	593.19	561.395					1450	145	482.714	515.797
1451	145.1	728.714	703.47					1451	145.1	364.667	352.254					1451	145.1	558.429	561.395					1451	145.1	447.286	515.797
1452	145.2	721.571	703.47					1452	145.2	363.429	352.254					1452	145.2	561.81	561.395					1452	145.2	528.905	515.797
1453	145.3	790.238	703.47					1453	145.3	347.048	352.254					1453	145.3	589.143	561.395					1453	145.3	583.381	515.797
1454	145.4	784.286	703.47					1454	145.4	369.19	352.254					1454	145.4	576.905	561.395					1454	145.4	479.571	515.797
1455	145.5	777	703.47					1455	145.5	334.524	352.254					1455	145.5	567.476	561.395					1455	145.5	432.857	515.797
1456	145.6	783.381	703.47					1456	145.6	322.143	352.254					1456	145.6	604.762	561.395					1456	145.6	507.19	515.797
1457	145.7	714.429	703.47					1457	145.7	342.286	352.254					1457	145.7	604.714	561.395					1457	145.7	469.286	515.797
1458	145.8	751.429	703.47					1458	145.8	358.095	352.254					1458	145.8	638.667	561.395					1458	145.8	527.571	515.797
1459	145.9	702.238	703.47					1459	145.9	340.762	352.254					1459	145.9	640.667	561.395					1459	145.9	560	615.657
1460	146	796.667	703.47					1460	146	395.333	352.254					1460	146	596.286	561.395					1460	146	610.381	615.657
1461	146.1	752.381	703.47					1461	146.1	368.048	352.254					1461	146.1	601	561.395					1461	146.1	573.048	615.657
1462	146.2	769.429	703.47					1462	146.2	359.381	352.254					1462	146.2	588.476	561.395					1462	146.2	564.476	615.657
1463	146.3	752.714	703.47					1463	146.3	347.381	352.254					1463	146.3	585.714	561.395					1463	146.3	542.095	615.657
1464	146.4	767	703.47					1464	146.4	344.524	352.254					1464	146.4	540.429	561.395					1464	146.4	585.905	615.657
1465	146.5	747.714	703.47					1465	146.5	317.381	352.254					1465	146.5	671.429	657.245					1465	146.5	540.714	515.797
1466	146.6	755.714	703.47					1466	146.6	338.762	352.254					1466	146.6	680.81	657.245					1466	146.6	531.762	515.797
1467	146.7	818.714	703.47					1467	146.7	331.19	352.254					1467	146.7	650.524	657.245					1467	146.7	507.667	515.797
1468	146.8	756.429	703.47					1468	146.8	363.476	352.254					1468	146.8	635.857	657.245					1468	146.8	522.952	515.797
1469	146.9	655.524	703.47					1469	146.9	336.095	352.254					1469	146.9	589.714	561.395					1469	146.9	560.238	515.797
1470	147	704.095	703.47					1470	147	433.095	431.117					1470	147	582.952	561.395					1470	147	494.19	515.797
1471	147.1	794.286	837.182					1471	147.1	461.333	431.117					1471	147.1	577	561.395					1471	147.1	490.762	515.797
1472	147.2	915.952	837.182					1472	147.2	460.286	431.117					1472	147.2	558.524	561.395					1472	147.2	457.143	515.797
1473	147.3	884.571	837.182					1473	147.3	434.429	431.117					1473	147.3	616.095	561.395					1473	147.3	474	515.797
1474	147.4	895	837.182					1474	147.4	417.81	431.117					1474	147.4	550.238	561.395					1474	147.4	510.476	515.797
1475	147.5	884.095	837.182					1475	147.5	440.333	431.117					1475	147.5	553.238	561.395					1475	147.5	487.714	515.797
1476	147.6	853.238	837.182					1476	147.6	429.333	431.117					1476	147.6	663.143	657.245					1476	147.6	470.524	515.797
1477	147.7	902.19	837.182					1477	147.7	442.762	431.117					1477	147.7	625.095	657.245					1477	147.7	472.571	515.797
1478	147.8	865.19	837.182					1478	147.8	455.286	431.117					1478	147.8	595.333	657.245					1478	147.8	485.048	515.797
1479	147.9	852.667	837.182					1479	147.9	450	431.117					1479	147.9	617.048	657.245					1479	147.9	473.333	515.797
1480	148	963.667	837.182					1480	148	424.905	431.117					1480	148	605.667	657.245					1480	148	505.143	515.797
1481	148.1	827.762	837.182					1481	148.1	441.238	431.117					1481	148.1	609.667	657.245					1481	148.1	467.667	515.797
1482	148.2	984.81	837.182					1482	148.2	375.81	352.254					1482	148.2	635.762	657.245					1482	148.2	527.952	515.797
1483	148.3	830.619	837.182					1483	148.3	331.952	352.254					1483	148.3	608.333	657.245					1483	148.3	497.571	515.797
1484	148.4	860	837.182					1484	148.4	378.571	352.254					1484	148.4	619.381	657.245					1484	148.4	471.81	515.797
1485	148.5	878.286	837.182					1485	148.5	347.571	352.254					1485	148.5	560.476	657.245					1485	148.5	439	515.797
1486	148.6	760.714	837.182					1486	148.6	344.143	352.254					1486	148.6	584.524	657.245					1486	148.6	469.429	515.797
1487	148.7	878.238	837.182					1487	148.7	354.429	352.254					1487	148.7	733.429	657.245					1487	148.7	462.095	515.797
1488	148.8	804.095	837.182					1488	148.8	352.619	352.254					1488	148.8	664	657.245					1488	148.8	579.952	515.797
1489	148.9	876.667	837.182					1489	148.9	339.048	352.254					1489	148.9	673.81	657.245					1489	148.9	483.714	515.797
1490	149	804.857	837.182					1490	149	335.905	352.254					1490	149	718.619	657.245					1490	149	468.333	515.797
1491	149.1	792.476	837.182					1491	149.1	363.81	352.254					1491	149.1	569.81	657.245					1491	149.1	483.333	515.797
1492	149.2	884.333	837.182					1492	149.2	352.571	352.254					1492	149.2	636.19	657.245					1492	149.2	478	515.797
1493	149.3	897.095	837.182					1493	149.3	338.952	352.254					1493	149.3	636.476	657.245					1493	149.3	566.143	515.797
1494	149.4	790.524	837.182					1494	149.4	339.952	352.254					1494	149.4	608.857	657.245					1494	149.4	585.476	515.797
1495	149.5	806.286	837.182					1495	149.5	426.762	431.117					1495	149.5	651	657.245					1495	149.5	537.095	515.797
1496	149.6	876.048	837.182					1496	149.6	422.476	431.117					1496	149.6	573.857	561.395					1496	149.6	554.143	515.797
1497	149.7	850.81	837.182					1497	149.7	431.571	431.117					1497	149.7	597.048	561.395					1497	149.7	534.476	515.797
1498	149.8	816.762	837.182					1498	149.8	436.714	431.117					1498	149.8	602.81	561.395					1498	149.8	459	515.797
1499	149.9	824.667	837.182					1499	149.9	451.571	431.117					1499	149.9	563.905	561.395					1499	149.9	545.619	515.797
1500	150	789.857	837.182					1500	150	453.286	431.117					1500	150	602.333	561.395					1500	150	529.762	515.797
1501	150.1	832.286	837.182					1501	150.1	385	431.117					1501	150.1	603.619	561.395					1501	150.1	561.048	515.797
1502	150.2	801.667	837.182					1502	150.2	356.524	352.254					1502	150.2	581.143	561.395					1502	150.2	498.333	515.797
1503	150.3	809.762	837.182					1503	150.3	374.524	352.254					1503	150.3	621.524	561.395					1503	150.3	473.238	515.797
1504	150.4	798.143	837.182					1504	150.4	354	352.254					1504	150.4	625	561.395					1504	150.4	471.619	515.797
1505	150.5	825.714	837.182					1505	150.5	354.286	352.254					1505	150.5	575	561.395					1505	150.5	493.048	515.797
1506	150.6	804.524	837.182					1506	150.6	336.667	352.254					1506	150.6	613.19	561.395					1506	150.6	415.524	424.282
1507	150.7	798.571	837.182					1507	150.7	383	431.117					1507	150.7	624.048	561.395					1507	150.7	430.238	424.282
1508	150.8	878.714	837.182					1508	150.8	497.905	504.122					1508	150.8	567.571	561.395					1508	150.8	461.286	424.282
1509	150.9	874.714	837.182					1509	150.9	526	504.122					1509	150.9	608.429	561.395					1509	150.9	439	424.282
1510	151	806.524	837.182					1510	151	509.619	504.122					1510	151	545.286	561.395					1510	151	441.19	424.282
1511	151.1	684.905	703.47					1511	151.1	495.571	504.122					1511	151.1	568.429	561.395					1511	151.1	469.381	424.282
1512	151.2	688.238	703.47					1512	151.2	477.238	504.122					1512	151.2	566.238	561.395					1512	151.2	492.905	515.797
1513	151.3	762.524	703.47					1513	151.3	504.095	504.122					1513	151.3	664.095	657.245					1513	151.3	520.524	515.797
1514	151.4	636.667	703.47					1514	151.4	487.048	504.122					1514	151.4	622.476	657.245					1514	151.4	521.238	515.797
1515	151.5	567.571	555.037					1515	151.5	568.857	591.48					1515	151.5	609.429	657.245					1515	151.5	490	515.797
1516	151.6	560.619	555.037					1516	151.6	627.571	591.48					1516	151.6	609.095	657.245					1516	151.6	514.714	515.797
1517	151.7	596.762	555.037					1517	151.7	642.762	591.48					1517	151.7	670.143	657.245					1517	151.7	479.143	515.797
1518	151.8	539.714	555.037					1518	151.8	536.286	591.48					1518	151.8	613.905	657.245					1518	151.8	514.524	515.797
1519	151.9	551.714	555.037					1519	151.9	524.619	591.48					1519	151.9	608.571	657.245					1519	151.9	519.952	515.797
1520	152	570.857	555.037					1520	152	517.333	591.48					1520	152	611.381	657.245					1520	152	499.19	515.797
1521	152.1	544.333	555.037					1521	152.1	527.333	591.48					1521	152.1	559.714	657.245					1521	152.1	525.619	515.797
1522	152.2	545.143	555.037					1522	152.2	566.286	591.48					1522	152.2	605.19	657.245					1522	152.2	433.476	424.282
1523	152.3	607.81	555.037					1523	152.3	594	591.48					1523	152.3	620.333	657.245					1523	152.3	445	424.282
1524	152.4	546.286	555.037					1524	152.4	567.714	591.48					1524	152.4	669.333	657.245					1524	152.4	420.667	424.282
1525	152.5	590.571	555.037					1525	152.5	533.19	591.48					1525	152.5	636.381	657.245					1525	152.5	375.095	424.282
1526	152.6	518.667	555.037					1526	152.6	537.381	591.48					1526	152.6	596.571	657.245					1526	152.6	394.571	424.282
1527	152.7	524.762	555.037					1527	152.7	503.048	591.48					1527	152.7	685.762	657.245					1527	152.7	386.905	424.282
1528	152.8	561.286	555.037					1528	152.8	638.143	591.48					1528	152.8	631.571	657.245					1528	152.8	407.762	424.282
1529	152.9	544.762	555.037					1529	152.9	606.095	591.48					1529	152.9	659.095	657.245					1529	152.9	456.238	424.282
1530	153	558.143	555.037					1530	153	521.238	504.122					1530	153	592.19	657.245					1530	153	422.095	424.282
1531	153.1	593.429	555.037					1531	153.1	525.048	504.122					1531	153.1	600.571	657.245					1531	153.1	383.429	424.282
1532	153.2	524.857	555.037					1532	153.2	530.238	504.122					1532	153.2	572.571	657.245					1532	153.2	416.048	424.282
1533	153.3	538.762	555.037					1533	153.3	490.857	504.122					1533	153.3	649.095	657.245					1533	153.3	428.095	424.282
1534	153.4	580.905	555.037					1534	153.4	505.714	504.122					1534	153.4	717.19	767.157					1534	153.4	400.238	424.282
1535	153.5	527.81	555.037					1535	153.5	488.524	504.122					1535	153.5	774.19	767.157					1535	153.5	445.905	424.282
1536	153.6	513.429	555.037					1536	153.6	491.048	504.122					1536	153.6	757.095	767.157					1536	153.6	444.333	424.282
1537	153.7	556.238	555.037					1537	153.7	583.571	504.122					1537	153.7	797.238	767.157					1537	153.7	444.905	424.282
1538	153.8	570.619	555.037					1538	153.8	516.095	504.122					1538	153.8	824.905	767.157					1538	153.8	451.048	424.282
1539	153.9	519.095	555.037					1539	153.9	497.905	504.122					1539	153.9	774.381	767.157					1539	153.9	415.048	424.282
1540	154	543.333	555.037					1540	154	478.143	504.122					1540	154	829.524	767.157					1540	154	420.714	424.282
1541	154.1	497.667	555.037					1541	154.1	439	504.122					1541	154.1	786.762	767.157					1541	154.1	449.476	424.282
1542	154.2	584.381	555.037					1542	154.2	508.19	504.122					1542	154.2	730.095	767.157					1542	154.2	414.714	424.282
1543	154.3	490.143	555.037					1543	154.3	505.81	504.122					1543	154.3	577.619	657.245					1543	154.3	428.286	424.282
1544	154.4	528.143	555.037					1544	154.4	564	504.122					1544	154.4	663.952	657.245					1544	154.4	453	424.282
1545	154.5	549.571	555.037					1545	154.5	489.857	504.122					1545	154.5	751.381	767.157					1545	154.5	432.19	424.282
1546	154.6	557.667	555.037					1546	154.6	511.714	504.122					1546	154.6	699.333	767.157					1546	154.6	441.857	424.282
1547	154.7	551.429	555.037					1547	154.7	526.333	504.122					1547	154.7	778.095	767.157					1547	154.7	420.905	424.282
1548	154.8	500.81	555.037					1548	154.8	562.048	591.48					1548	154.8	769.286	767.157					1548	154.8	384.095	424.282
1549	154.9	565.81	555.037					1549	154.9	623.524	591.48					1549	154.9	710.381	767.157					1549	154.9	378.905	424.282
1550	155	566.619	555.037					1550	155	584	591.48					1550	155	701.952	767.157					1550	155	487.81	515.797
1551	155.1	517.952	555.037					1551	155.1	635.857	591.48					1551	155.1	773.667	767.157					1551	155.1	542.048	515.797
1552	155.2	530.429	555.037					1552	155.2	641.238	591.48					1552	155.2	730.762	767.157					1552	155.2	452.905	515.797
1553	155.3	584.667	555.037					1553	155.3	586.048	591.48					1553	155.3	728.667	767.157					1553	155.3	499.143	515.797
1554	155.4	581.667	555.037					1554	155.4	539.952	591.48					1554	155.4	814.143	767.157					1554	155.4	501.143	515.797
1555	155.5	516	555.037					1555	155.5	573.524	591.48					1555	155.5	741.143	767.157					1555	155.5	537.524	515.797
1556	155.6	540.333	555.037					1556	155.6	597.381	591.48					1556	155.6	777.333	767.157					1556	155.6	530.381	515.797
1557	155.7	567.333	555.037					1557	155.7	607.381	591.48					1557	155.7	715.333	767.157					1557	155.7	621.905	615.657
1558	155.8	550.952	555.037					1558	155.8	587.333	591.48					1558	155.8	668.571	767.157					1558	155.8	589.143	615.657
1559	155.9	538.667	555.037					1559	155.9	629.333	591.48					1559	155.9	726.333	767.157					1559	155.9	719.667	615.657
1560	156	539.095	555.037					1560	156	569.476	591.48					1560	156	754.19	767.157					1560	156	603.857	615.657
1561	156.1	699.762	703.47					1561	156.1	527	591.48					1561	156.1	742.238	767.157					1561	156.1	610.095	615.657
1562	156.2	736.619	703.47					1562	156.2	495.714	591.48					1562	156.2	691	657.245					1562	156.2	649.381	615.657
1563	156.3	690.905	703.47					1563	156.3	611.524	591.48					1563	156.3	604.381	561.395					1563	156.3	611.333	615.657
1564	156.4	652.333	703.47					1564	156.4	585.048	591.48					1564	156.4	543	561.395					1564	156.4	564.19	615.657
1565	156.5	654.238	703.47					1565	156.5	594.524	591.48					1565	156.5	603	561.395					1565	156.5	713.238	615.657
1566	156.6	697.381	703.47					1566	156.6	577.381	591.48					1566	156.6	579.286	561.395					1566	156.6	696.333	615.657
1567	156.7	706.952	703.47					1567	156.7	646.048	591.48					1567	156.7	519.619	561.395					1567	156.7	607.81	615.657
1568	156.8	674.571	703.47					1568	156.8	512.857	591.48					1568	156.8	441.476	447.884					1568	156.8	619.381	615.657
1569	156.9	703.476	703.47					1569	156.9	547.952	591.48					1569	156.9	409.905	447.884					1569	156.9	642.762	615.657
1570	157	680.238	703.47					1570	157	566.952	591.48					1570	157	475.429	447.884					1570	157	631.952	615.657
1571	157.1	733.143	703.47					1571	157.1	570.19	591.48					1571	157.1	422.905	447.884					1571	157.1	597.619	615.657
1572	157.2	717.857	703.47					1572	157.2	615.667	591.48					1572	157.2	458.905	447.884					1572	157.2	552.143	615.657
1573	157.3	736.762	703.47					1573	157.3	600.571	591.48					1573	157.3	455.238	447.884					1573	157.3	646.286	615.657
1574	157.4	662.333	703.47					1574	157.4	643.19	591.48					1574	157.4	468.286	447.884					1574	157.4	589.571	615.657
1575	157.5	717.333	703.47					1575	157.5	639.762	591.48					1575	157.5	441.286	447.884					1575	157.5	602.238	615.657
1576	157.6	729.714	703.47					1576	157.6	555.571	591.48					1576	157.6	419	447.884					1576	157.6	639.095	615.657
1577	157.7	692.857	703.47					1577	157.7	490.095	591.48					1577	157.7	534.81	561.395					1577	157.7	618.857	615.657
1578	157.8	671.429	703.47					1578	157.8	566.905	591.48					1578	157.8	558.571	561.395					1578	157.8	824.762	728.573
1579	157.9	697.714	703.47					1579	157.9	564.095	591.48					1579	157.9	587.381	561.395					1579	157.9	738.048	728.573
1580	158	717.81	703.47					1580	158	626.714	591.48					1580	158	559.571	561.395					1580	158	803.619	728.573
1581	158.1	665.286	703.47					1581	158.1	516.952	591.48					1581	158.1	594.19	561.395					1581	158.1	765.714	728.573
1582	158.2	730.762	703.47					1582	158.2	477.333	591.48					1582	158.2	562.667	561.395					1582	158.2	722.81	728.573
1583	158.3	683.476	703.47					1583	158.3	595.381	591.48					1583	158.3	561.81	561.395					1583	158.3	752.333	728.573
1584	158.4	746.429	703.47					1584	158.4	495.952	591.48					1584	158.4	477.905	447.884					1584	158.4	755.762	728.573
1585	158.5	690.238	703.47					1585	158.5	621.476	591.48					1585	158.5	456.571	447.884					1585	158.5	744.952	728.573
1586	158.6	679.286	703.47					1586	158.6	585.048	591.48					1586	158.6	452.19	447.884					1586	158.6	736.81	728.573
1587	158.7	688.143	703.47					1587	158.7	599.762	591.48					1587	158.7	469.143	447.884					1587	158.7	736.952	728.573
1588	158.8	646.762	703.47					1588	158.8	507.667	591.48					1588	158.8	505.857	447.884					1588	158.8	749.524	728.573
1589	158.9	682.429	703.47					1589	158.9	547.714	591.48					1589	158.9	417.333	447.884					1589	158.9	722.571	728.573
1590	159	667.714	703.47					1590	159	599.857	591.48					1590	159	459.19	447.884					1590	159	709.19	728.573
1591	159.1	623.095	703.47					1591	159.1	553.524	591.48					1591	159.1	402.476	447.884					1591	159.1	659.857	728.573
1592	159.2	696.048	703.47					1592	159.2	550.524	591.48					1592	159.2	457.095	447.884					1592	159.2	709.952	728.573
1593	159.3	660.762	703.47					1593	159.3	552.095	591.48					1593	159.3	468.714	447.884					1593	159.3	694.762	728.573
1594	159.4	648.81	703.47					1594	159.4	540.619	504.122					1594	159.4	484.762	447.884					1594	159.4	764	728.573
1595	159.5	674.619	703.47					1595	159.5	526.571	504.122					1595	159.5	482.667	447.884					1595	159.5	720.81	728.573
1596	159.6	704.714	703.47					1596	159.6	510.381	504.122					1596	159.6	475.571	447.884					1596	159.6	730.714	728.573
1597	159.7	683.571	703.47					1597	159.7	463.095	504.122					1597	159.7	450.714	447.884					1597	159.7	652.667	728.573
1598	159.8	705.619	703.47					1598	159.8	550.81	504.122					1598	159.8	432.048	447.884					1598	159.8	774.905	728.573
1599	159.9	707.143	703.47					1599	159.9	484.429	504.122					1599	159.9	463.619	447.884					1599	159.9	698.952	728.573
1600	160	695.905	703.47					1600	160	516.524	504.122					1600	160	428.714	447.884					1600	160	697.762	728.573
1601	160.1	657.381	703.47					1601	160.1	561.429	504.122					1601	160.1	479.905	447.884					1601	160.1	703.429	728.573
1602	160.2	690.667	703.47					1602	160.2	555.619	504.122					1602	160.2	466.952	447.884					1602	160.2	754.048	728.573
1603	160.3	587.905	555.037					1603	160.3	499.524	504.122					1603	160.3	469.429	447.884					1603	160.3	779.857	728.573
1604	160.4	548.762	555.037					1604	160.4	524	504.122					1604	160.4	494.095	447.884					1604	160.4	718.571	728.573
1605	160.5	553	555.037					1605	160.5	530.81	504.122					1605	160.5	432.667	447.884					1605	160.5	642.238	615.657
1606	160.6	523	555.037					1606	160.6	515.238	504.122					1606	160.6	468.381	447.884					1606	160.6	609.381	615.657
1607	160.7	504.952	555.037					1607	160.7	546.286	504.122					1607	160.7	468.762	447.884					1607	160.7	598.429	615.657
1608	160.8	475.095	555.037					1608	160.8	553.095	504.122					1608	160.8	460.905	447.884					1608	160.8	552.524	615.657
1609	160.9	580.762	555.037					1609	160.9	556.429	504.122					1609	160.9	442.524	447.884					1609	160.9	625.762	615.657
1610	161	507.476	555.037					1610	161	486.238	504.122					1610	161	424.667	447.884					1610	161	666.095	615.657
1611	161.1	612.429	555.037					1611	161.1	511.143	504.122					1611	161.1	428.667	447.884					1611	161.1	594.19	615.657
1612	161.2	550.81	555.037					1612	161.2	538.238	504.122					1612	161.2	475.429	447.884					1612	161.2	511.429	515.797
1613	161.3	512.762	555.037					1613	161.3	588.476	504.122					1613	161.3	437.095	447.884					1613	161.3	530.619	515.797
1614	161.4	376.905	408.832					1614	161.4	596	504.122					1614	161.4	432.762	447.884					1614	161.4	545.476	515.797
1615	161.5	398.81	408.832					1615	161.5	550.905	504.122					1615	161.5	530.524	447.884					1615	161.5	525.619	515.797
1616	161.6	412.048	408.832					1616	161.6	499.571	504.122					1616	161.6	436.619	447.884					1616	161.6	490.095	515.797
1617	161.7	393.667	408.832					1617	161.7	552.476	504.122					1617	161.7	446.667	447.884					1617	161.7	576.81	515.797
1618	161.8	431.905	408.832					1618	161.8	537.286	504.122					1618	161.8	450.333	447.884					1618	161.8	546.952	515.797
1619	161.9	425.905	408.832					1619	161.9	582.476	504.122					1619	161.9	499.714	447.884					1619	161.9	514.476	515.797
1620	162	404.524	408.832					1620	162	557.524	504.122					1620	162	448.81	447.884					1620	162	488.667	515.797
1621	162.1	408.381	408.832					1621	162.1	532.762	504.122					1621	162.1	437.524	447.884					1621	162.1	510.143	515.797
1622	162.2	392.571	408.832					1622	162.2	549.571	504.122					1622	162.2	457.048	447.884					1622	162.2	513.81	515.797
1623	162.3	391.667	408.832					1623	162.3	485.524	504.122					1623	162.3	452.857	447.884					1623	162.3	507.81	515.797
1624	162.4	363.952	408.832					1624	162.4	521.905	504.122					1624	162.4	497.667	447.884					1624	162.4	504.476	515.797
1625	162.5	414.048	408.832					1625	162.5	492.333	504.122					1625	162.5	469.81	447.884					1625	162.5	593	515.797
1626	162.6	446.476	408.832					1626	162.6	521.952	504.122					1626	162.6	393.333	447.884					1626	162.6	515.619	515.797
1627	162.7	411.238	408.832					1627	162.7	592.381	504.122					1627	162.7	478.524	447.884					1627	162.7	512.238	515.797
1628	162.8	491.333	555.037					1628	162.8	541	504.122					1628	162.8	452.714	447.884					1628	162.8	500	515.797
1629	162.9	505	555.037					1629	162.9	510.857	504.122					1629	162.9	447	447.884					1629	162.9	534.476	515.797
1630	163	549.238	555.037					1630	163	483.286	504.122					1630	163	462.81	447.884					1630	163	559.381	515.797
1631	163.1	555.81	555.037					1631	163.1	508.286	504.122					1631	163.1	452.762	447.884					1631	163.1	524.905	515.797
1632	163.2	538.286	555.037					1632	163.2	533.714	504.122					1632	163.2	468.762	447.884					1632	163.2	501.333	515.797
1633	163.3	438.476	408.832					1633	163.3	503.762	504.122					1633	163.3	465.524	447.884					1633	163.3	512.714	515.797
1634	163.4	414.143	408.832					1634	163.4	531.714	504.122					1634	163.4	516.429	447.884					1634	163.4	510.905	515.797
1635	163.5	383.095	408.832					1635	163.5	578.095	504.122					1635	163.5	446.762	447.884					1635	163.5	544.19	515.797
1636	163.6	432.714	408.832					1636	163.6	499.143	504.122					1636	163.6	514.143	561.395					1636	163.6	529.571	515.797
1637	163.7	415.333	408.832					1637	163.7	570.048	504.122					1637	163.7	625.476	561.395					1637	163.7	529.524	515.797
1638	163.8	407.667	408.832					1638	163.8	560.714	504.122					1638	163.8	622.286	561.395					1638	163.8	549.381	515.797
1639	163.9	391.19	408.832					1639	163.9	506.238	504.122					1639	163.9	534.286	561.395					1639	163.9	544	515.797
1640	164	396.429	408.832					1640	164	529.667	504.122					1640	164	663.095	561.395					1640	164	542.905	515.797
1641	164.1	422.524	408.832					1641	164.1	584	504.122					1641	164.1	580.333	561.395					1641	164.1	548.048	515.797
1642	164.2	410.524	408.832					1642	164.2	530.857	504.122					1642	164.2	590.095	561.395					1642	164.2	573.667	515.797
1643	164.3	418.048	408.832					1643	164.3	516.81	504.122					1643	164.3	563.476	561.395					1643	164.3	526.429	515.797
1644	164.4	415.429	408.832					1644	164.4	515.333	504.122					1644	164.4	635	561.395					1644	164.4	559.429	515.797
1645	164.5	373.19	408.832					1645	164.5	514.381	504.122					1645	164.5	590.286	561.395					1645	164.5	530.714	515.797
1646	164.6	388.762	408.832					1646	164.6	568.476	504.122					1646	164.6	393.619	447.884					1646	164.6	540	515.797
1647	164.7	391.381	408.832					1647	164.7	581.905	504.122					1647	164.7	457.381	447.884					1647	164.7	535.048	515.797
1648	164.8	383.714	408.832					1648	164.8	577.429	504.122					1648	164.8	461.857	447.884					1648	164.8	591.952	615.657
1649	164.9	397.905	408.832					1649	164.9	501.762	504.122					1649	164.9	433.143	447.884					1649	164.9	631.952	615.657
1650	165	412.524	408.832					1650	165	495.952	504.122					1650	165	450.619	447.884					1650	165	463.048	515.797
1651	165.1	391.524	408.832					1651	165.1	519.619	504.122					1651	165.1	417.952	447.884					1651	165.1	529.857	515.797
1652	165.2	381.571	408.832					1652	165.2	507.667	504.122					1652	165.2	452.571	447.884					1652	165.2	510.952	515.797
1653	165.3	380.952	408.832					1653	165.3	522.571	504.122					1653	165.3	435.048	447.884					1653	165.3	531.571	515.797
1654	165.4	412.762	408.832					1654	165.4	550	504.122					1654	165.4	430.952	447.884					1654	165.4	587.143	615.657
1655	165.5	377.81	408.832					1655	165.5	500.238	504.122					1655	165.5	450	447.884					1655	165.5	607.524	615.657
1656	165.6	438.524	408.832					1656	165.6	516.381	504.122					1656	165.6	477.143	447.884					1656	165.6	595.857	615.657
1657	165.7	426.381	408.832					1657	165.7	551.714	504.122					1657	165.7	467.333	447.884					1657	165.7	548.524	615.657
1658	165.8	391.238	408.832					1658	165.8	530.571	504.122					1658	165.8	478.762	447.884					1658	165.8	572.524	615.657
1659	165.9	395.762	408.832					1659	165.9	517.762	504.122					1659	165.9	452.857	447.884					1659	165.9	678.952	615.657
1660	166	473.143	408.832					1660	166	507.714	504.122					1660	166	437.048	447.884					1660	166	603.952	615.657
1661	166.1	395.238	408.832					1661	166.1	537.19	504.122					1661	166.1	447.952	447.884					1661	166.1	601.238	615.657
1662	166.2	442.095	408.832					1662	166.2	542.571	504.122					1662	166.2	431.714	447.884					1662	166.2	584.286	615.657
1663	166.3	398.143	408.832					1663	166.3	510.714	504.122					1663	166.3	422.286	447.884					1663	166.3	489.524	515.797
1664	166.4	379.81	408.832					1664	166.4	505.048	504.122					1664	166.4	460.476	447.884					1664	166.4	491.143	515.797
1665	166.5	401.667	408.832					1665	166.5	515.905	504.122					1665	166.5	477.286	447.884					1665	166.5	501	515.797
1666	166.6	382.429	408.832					1666	166.6	552.81	504.122					1666	166.6	461.905	447.884					1666	166.6	532.429	515.797
1667	166.7	383.619	408.832					1667	166.7	568.857	504.122					1667	166.7	461.238	447.884					1667	166.7	500.048	515.797
1668	166.8	393.81	408.832					1668	166.8	541.143	504.122					1668	166.8	430.095	447.884					1668	166.8	536.571	515.797
1669	166.9	403.667	408.832					1669	166.9	517.286	504.122					1669	166.9	422.762	447.884					1669	166.9	498.81	515.797
1670	167	414.762	408.832					1670	167	521.333	504.122					1670	167	398.714	447.884					1670	167	511.381	515.797
1671	167.1	394.476	408.832					1671	167.1	564.333	504.122					1671	167.1	440.238	447.884					1671	167.1	485.762	515.797
1672	167.2	368.571	408.832					1672	167.2	524.095	504.122					1672	167.2	435.429	447.884					1672	167.2	528	515.797
1673	167.3	381.857	408.832					1673	167.3	554.571	504.122					1673	167.3	455.429	447.884					1673	167.3	518.286	515.797
1674	167.4	375.048	408.832					1674	167.4	548.19	504.122					1674	167.4	440.952	447.884					1674	167.4	491.429	515.797
1675	167.5	375.905	408.832					1675	167.5	540.333	504.122					1675	167.5	419.524	447.884					1675	167.5	436.762	424.282
1676	167.6	404.81	408.832					1676	167.6	506.095	504.122					1676	167.6	490.095	447.884					1676	167.6	397.429	424.282
1677	167.7	412.095	408.832					1677	167.7	482.476	504.122					1677	167.7	480.429	447.884					1677	167.7	369.286	424.282
1678	167.8	361.143	408.832					1678	167.8	475.238	504.122					1678	167.8	488.762	447.884					1678	167.8	436.571	424.282
1679	167.9	371.952	408.832					1679	167.9	543.714	504.122					1679	167.9	479.476	447.884					1679	167.9	395.476	424.282
1680	168	694.952	703.47					1680	168	497.524	504.122					1680	168	422.476	447.884					1680	168	384.905	424.282
1681	168.1	414.619	408.832					1681	168.1	475.524	504.122					1681	168.1	403.048	447.884					1681	168.1	442.81	424.282
1682	168.2	409	408.832					1682	168.2	508.619	504.122					1682	168.2	435.19	447.884					1682	168.2	433.81	424.282
1683	168.3	364.429	408.832					1683	168.3	499.095	504.122					1683	168.3	517.19	561.395					1683	168.3	472.81	424.282
1684	168.4	418.048	408.832					1684	168.4	524.762	504.122					1684	168.4	573	561.395					1684	168.4	446.81	424.282
1685	168.5	418.524	408.832					1685	168.5	539.857	504.122					1685	168.5	627.857	561.395					1685	168.5	507.952	515.797
1686	168.6	426.81	408.832					1686	168.6	507.81	504.122					1686	168.6	574.286	561.395					1686	168.6	482.857	515.797
1687	168.7	407	408.832					1687	168.7	486.429	504.122					1687	168.7	600.143	561.395					1687	168.7	499.286	515.797
1688	168.8	406.571	408.832					1688	168.8	522.571	504.122					1688	168.8	564.571	561.395					1688	168.8	606.048	515.797
1689	168.9	371.381	408.832					1689	168.9	506.381	504.122					1689	168.9	507.143	561.395					1689	168.9	537.476	515.797
1690	169	424.667	408.832					1690	169	532.524	504.122					1690	169	615	561.395					1690	169	489.286	515.797
1691	169.1	398.429	408.832					1691	169.1	519.524	504.122					1691	169.1	577.619	561.395					1691	169.1	568.667	515.797
1692	169.2	392.905	408.832					1692	169.2	505.905	504.122					1692	169.2	584.095	561.395					1692	169.2	462.333	424.282
1693	169.3	435.476	408.832					1693	169.3	505.476	504.122					1693	169.3	577.238	561.395					1693	169.3	417.619	424.282
1694	169.4	411.381	408.832					1694	169.4	552.81	504.122					1694	169.4	657.857	561.395					1694	169.4	452.095	424.282
1695	169.5	411.619	408.832					1695	169.5	507.762	504.122					1695	169.5	556.571	561.395					1695	169.5	472.905	424.282
1696	169.6	380.619	408.832					1696	169.6	511.19	504.122					1696	169.6	575.857	561.395					1696	169.6	471.524	424.282
1697	169.7	422.095	408.832					1697	169.7	482.19	504.122					1697	169.7	606.81	657.245					1697	169.7	476.952	424.282
1698	169.8	426.286	408.832					1698	169.8	493.857	504.122					1698	169.8	692.19	657.245					1698	169.8	446.286	424.282
1699	169.9	414.667	408.832					1699	169.9	546.524	504.122					1699	169.9	802.476	657.245					1699	169.9	454.952	424.282
1700	170	411.762	408.832					1700	170	495.857	504.122					1700	170	752.952	657.245					1700	170	504.905	424.282
1701	170.1	407.19	408.832					1701	170.1	599.333	504.122					1701	170.1	701.714	657.245					1701	170.1	442.333	424.282
1702	170.2	380.619	408.832					1702	170.2	535.952	504.122					1702	170.2	695.238	657.245					1702	170.2	458.81	424.282
1703	170.3	402.333	408.832					1703	170.3	514.667	504.122					1703	170.3	687.667	657.245					1703	170.3	489.619	515.797
1704	170.4	410.429	408.832					1704	170.4	462.429	504.122					1704	170.4	731.238	657.245					1704	170.4	504.524	515.797
1705	170.5	478.238	555.037					1705	170.5	445.095	504.122					1705	170.5	685.714	657.245					1705	170.5	518.19	515.797
1706	170.6	513.762	555.037					1706	170.6	447.571	504.122					1706	170.6	665.714	657.245					1706	170.6	507.048	515.797
1707	170.7	532.333	555.037					1707	170.7	459.524	504.122					1707	170.7	662.857	657.245					1707	170.7	522.238	515.797
1708	170.8	504.81	555.037					1708	170.8	450.714	504.122					1708	170.8	672.762	657.245					1708	170.8	483.81	515.797
1709	170.9	493.333	555.037					1709	170.9	485.476	504.122					1709	170.9	789.524	657.245					1709	170.9	535.524	515.797
1710	171	521.952	555.037					1710	171	491.81	504.122					1710	171	669.667	657.245					1710	171	535.619	515.797
1711	171.1	515.619	555.037					1711	171.1	445	504.122					1711	171.1	683.238	657.245					1711	171.1	528.143	515.797
1712	171.2	520.476	555.037					1712	171.2	499.762	504.122					1712	171.2	703.762	657.245					1712	171.2	577.667	515.797
1713	171.3	536.619	555.037					1713	171.3	467.381	504.122					1713	171.3	718.714	657.245					1713	171.3	517.238	515.797
1714	171.4	543.143	555.037					1714	171.4	536.286	504.122					1714	171.4	781.143	657.245					1714	171.4	495.571	515.797
1715	171.5	566.571	555.037					1715	171.5	405	504.122					1715	171.5	704.286	657.245					1715	171.5	510.286	515.797
1716	171.6	541.048	555.037					1716	171.6	486.524	504.122					1716	171.6	741.095	657.245					1716	171.6	516.048	515.797
1717	171.7	536.095	555.037					1717	171.7	454.286	504.122					1717	171.7	707.524	657.245					1717	171.7	545.429	515.797
1718	171.8	519.571	555.037					1718	171.8	473.857	504.122					1718	171.8	735.095	657.245					1718	171.8	530.476	515.797
1719	171.9	531.667	555.037					1719	171.9	473.952	504.122					1719	171.9	698.619	657.245					1719	171.9	574.143	515.797
1720	172	549.333	555.037					1720	172	470.476	504.122					1720	172	690.524	657.245					1720	172	512.333	515.797
1721	172.1	640	703.47					1721	172.1	492.619	504.122					1721	172.1	679.762	657.245					1721	172.1	570	515.797
1722	172.2	719.667	703.47					1722	172.2	529.81	504.122					1722	172.2	726.143	657.245					1722	172.2	487.81	515.797
1723	172.3	685.143	703.47					1723	172.3	564.095	504.122					1723	172.3	718.619	657.245					1723	172.3	513.429	515.797
1724	172.4	801.048	837.182					1724	172.4	550.81	504.122					1724	172.4	729.571	657.245					1724	172.4	512.952	515.797
1725	172.5	754.619	837.182					1725	172.5	508.857	504.122					1725	172.5	722.286	657.245					1725	172.5	554.143	515.797
1726	172.6	769.429	837.182					1726	172.6	521.905	504.122					1726	172.6	674.857	657.245					1726	172.6	514.81	515.797
1727	172.7	748.667	837.182					1727	172.7	547.905	504.122					1727	172.7	675.381	657.245					1727	172.7	526.524	515.797
1728	172.8	844.238	837.182					1728	172.8	557.19	504.122					1728	172.8	729.429	657.245					1728	172.8	573.524	515.797
1729	172.9	806.333	837.182					1729	172.9	519.81	504.122					1729	172.9	775	657.245					1729	172.9	531.095	515.797
1730	173	797.19	837.182					1730	173	515.857	504.122					1730	173	678.238	657.245					1730	173	524.571	515.797
1731	173.1	732.619	837.182					1731	173.1	485.333	504.122					1731	173.1	546	561.395					1731	173.1	489.81	515.797
1732	173.2	802.667	837.182					1732	173.2	504.905	504.122					1732	173.2	533.476	561.395					1732	173.2	520.19	515.797
1733	173.3	803.238	837.182					1733	173.3	539.048	504.122					1733	173.3	644.238	561.395					1733	173.3	450.619	424.282
1734	173.4	800.048	837.182					1734	173.4	512.476	504.122					1734	173.4	450.238	447.884					1734	173.4	463.048	424.282
1735	173.5	770.571	837.182					1735	173.5	492.952	504.122					1735	173.5	411.476	447.884					1735	173.5	453.667	424.282
1736	173.6	792.667	837.182					1736	173.6	516.333	504.122					1736	173.6	469.429	447.884					1736	173.6	402.524	424.282
1737	173.7	820.857	837.182					1737	173.7	512.81	504.122					1737	173.7	415.667	447.884					1737	173.7	416.952	424.282
1738	173.8	768	837.182					1738	173.8	533.524	504.122					1738	173.8	488	447.884					1738	173.8	414.952	424.282
1739	173.9	776.095	837.182					1739	173.9	499.381	504.122					1739	173.9	429.19	447.884					1739	173.9	400.429	424.282
1740	174	728.333	837.182					1740	174	521.667	504.122					1740	174	470.714	447.884					1740	174	430	424.282
1741	174.1	753.143	837.182					1741	174.1	526.286	504.122					1741	174.1	460.905	447.884					1741	174.1	419	424.282
1742	174.2	775.048	837.182					1742	174.2	546	504.122					1742	174.2	414.095	447.884					1742	174.2	448.143	424.282
1743	174.3	838.048	837.182					1743	174.3	574.476	504.122					1743	174.3	468.81	447.884					1743	174.3	479.619	424.282
1744	174.4	713.952	703.47					1744	174.4	498.81	504.122					1744	174.4	449.524	447.884					1744	174.4	443.048	424.282
1745	174.5	596.905	555.037					1745	174.5	473.381	504.122					1745	174.5	479.143	447.884					1745	174.5	454.81	424.282
1746	174.6	554.429	555.037					1746	174.6	528.143	504.122					1746	174.6	476.19	447.884					1746	174.6	417.476	424.282
1747	174.7	555.619	555.037					1747	174.7	500.81	504.122					1747	174.7	465.429	447.884					1747	174.7	362	424.282
1748	174.8	542.286	555.037					1748	174.8	516.714	504.122					1748	174.8	414.238	447.884					1748	174.8	407.952	424.282
1749	174.9	544.667	555.037					1749	174.9	492.19	504.122					1749	174.9	392.381	447.884					1749	174.9	455.19	424.282
1750	175	544.381	555.037					1750	175	430.429	504.122					1750	175	461.857	447.884					1750	175	426.81	424.282
1751	175.1	552.048	555.037					1751	175.1	489.286	504.122					1751	175.1	440.714	447.884					1751	175.1	494.238	424.282
1752	175.2	590.238	555.037					1752	175.2	483.857	504.122					1752	175.2	436.81	447.884					1752	175.2	389.524	424.282
1753	175.3	548.667	555.037					1753	175.3	555	504.122					1753	175.3	486.048	447.884					1753	175.3	439.952	424.282
[truncated: 6,247 more rows]

## Sheet: Figure 5-figure supplement 5
	State Occupancy
Ligands Bound	tetrameric CNBD*	Activated HCN2**	Non-Activated HCN2***
0	22.859	1.1178	50.2436
[truncated: 7 more rows]
