# Supplementary figures and images for: Top-down machine learning approach for high-throughput single-molecule analysis
Source: eLife journal article supplement (doi:10.7554/elife.53357), 2020-04-08

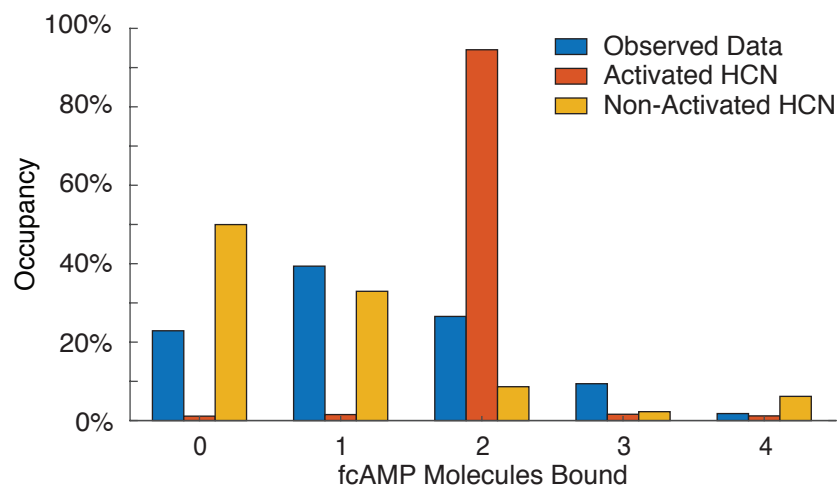

Figure 5-figure supplement 5

Supplement: supp [file elife-53357-supp-v1.zip]

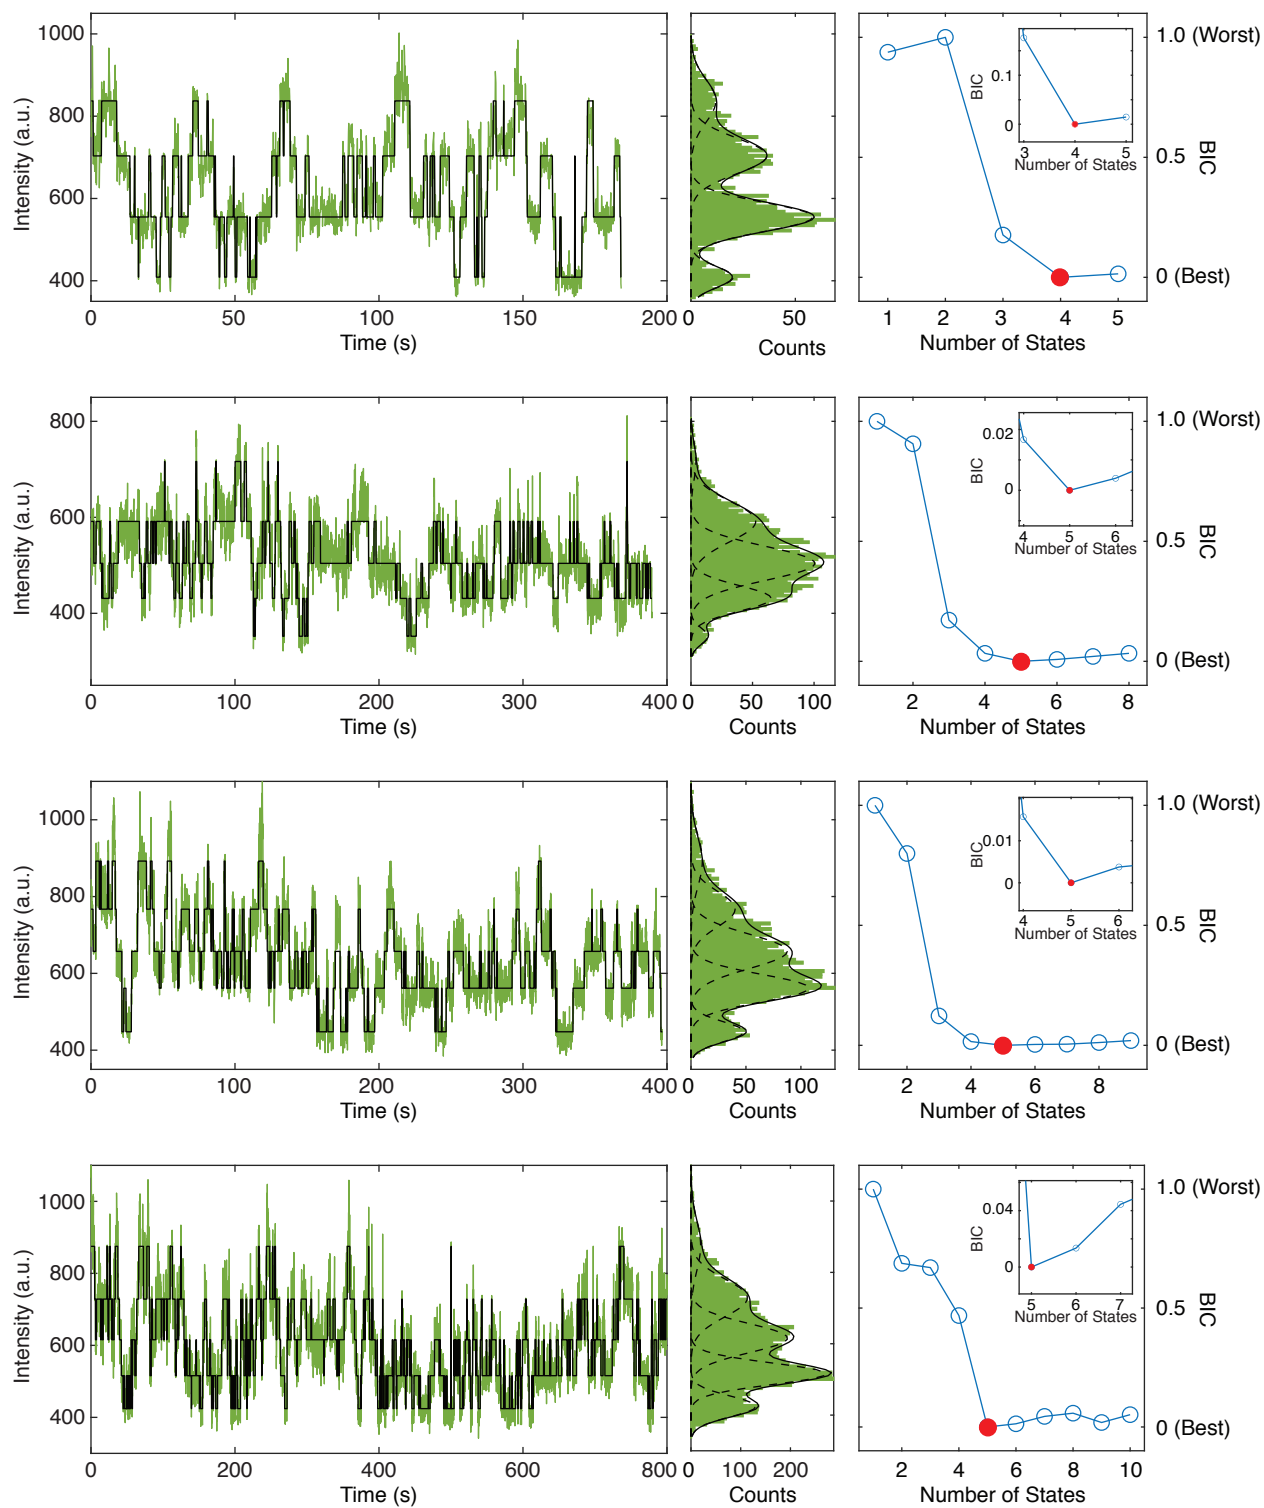

Figure 5-figure supplement 3

Supplement: supp [file elife-53357-supp-v1.zip]

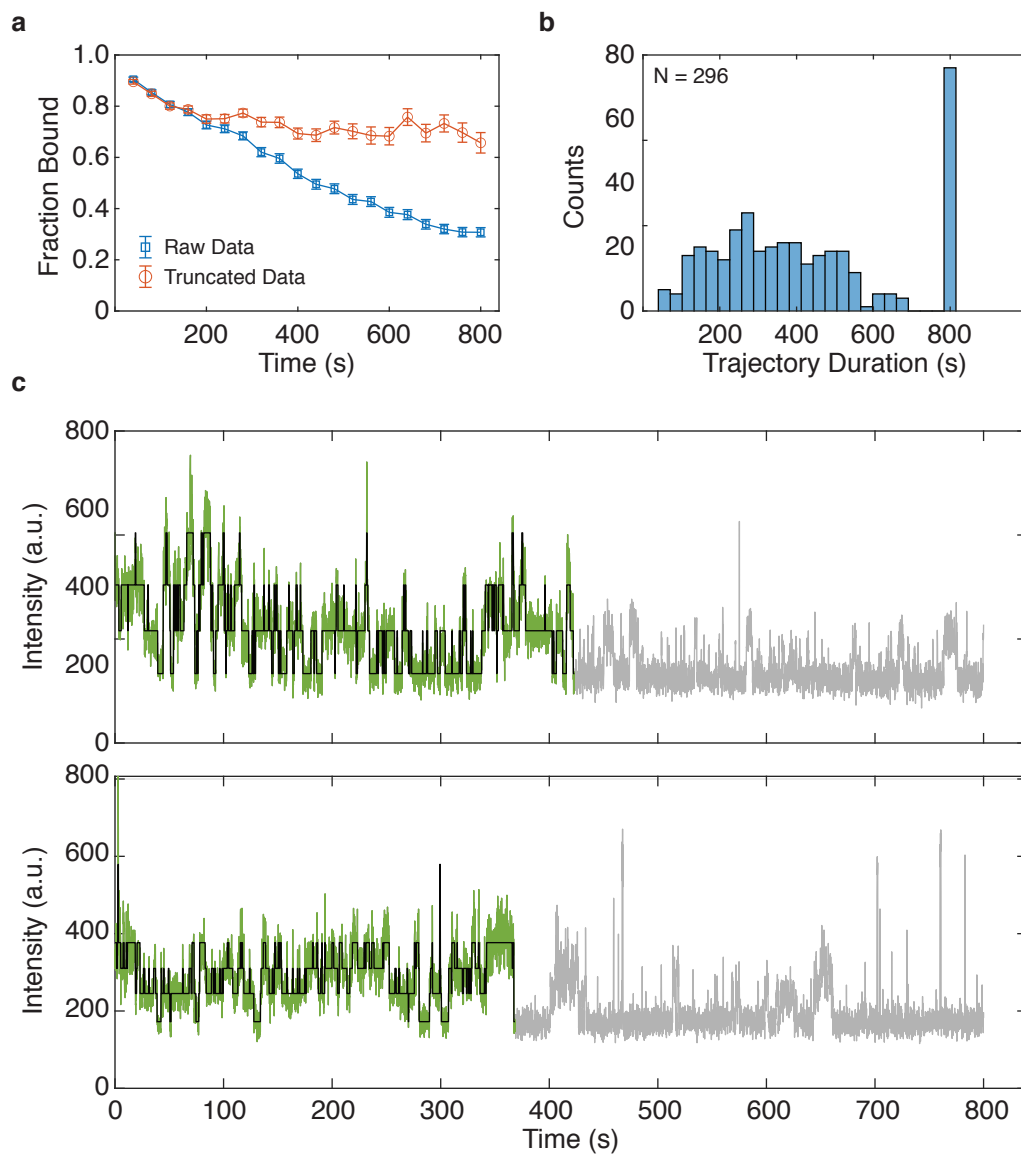

Figure 5-figure supplement 4

Supplement: supp [file elife-53357-supp-v1.zip]

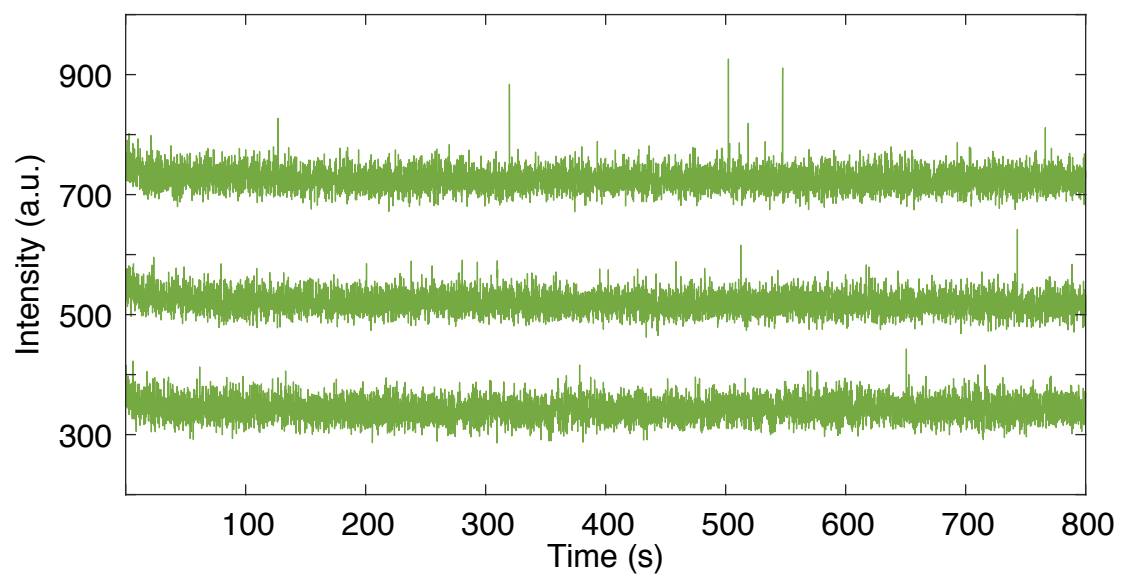

Figure 5-figure supplement 2

Supplement: supp [file elife-53357-supp-v1.zip]

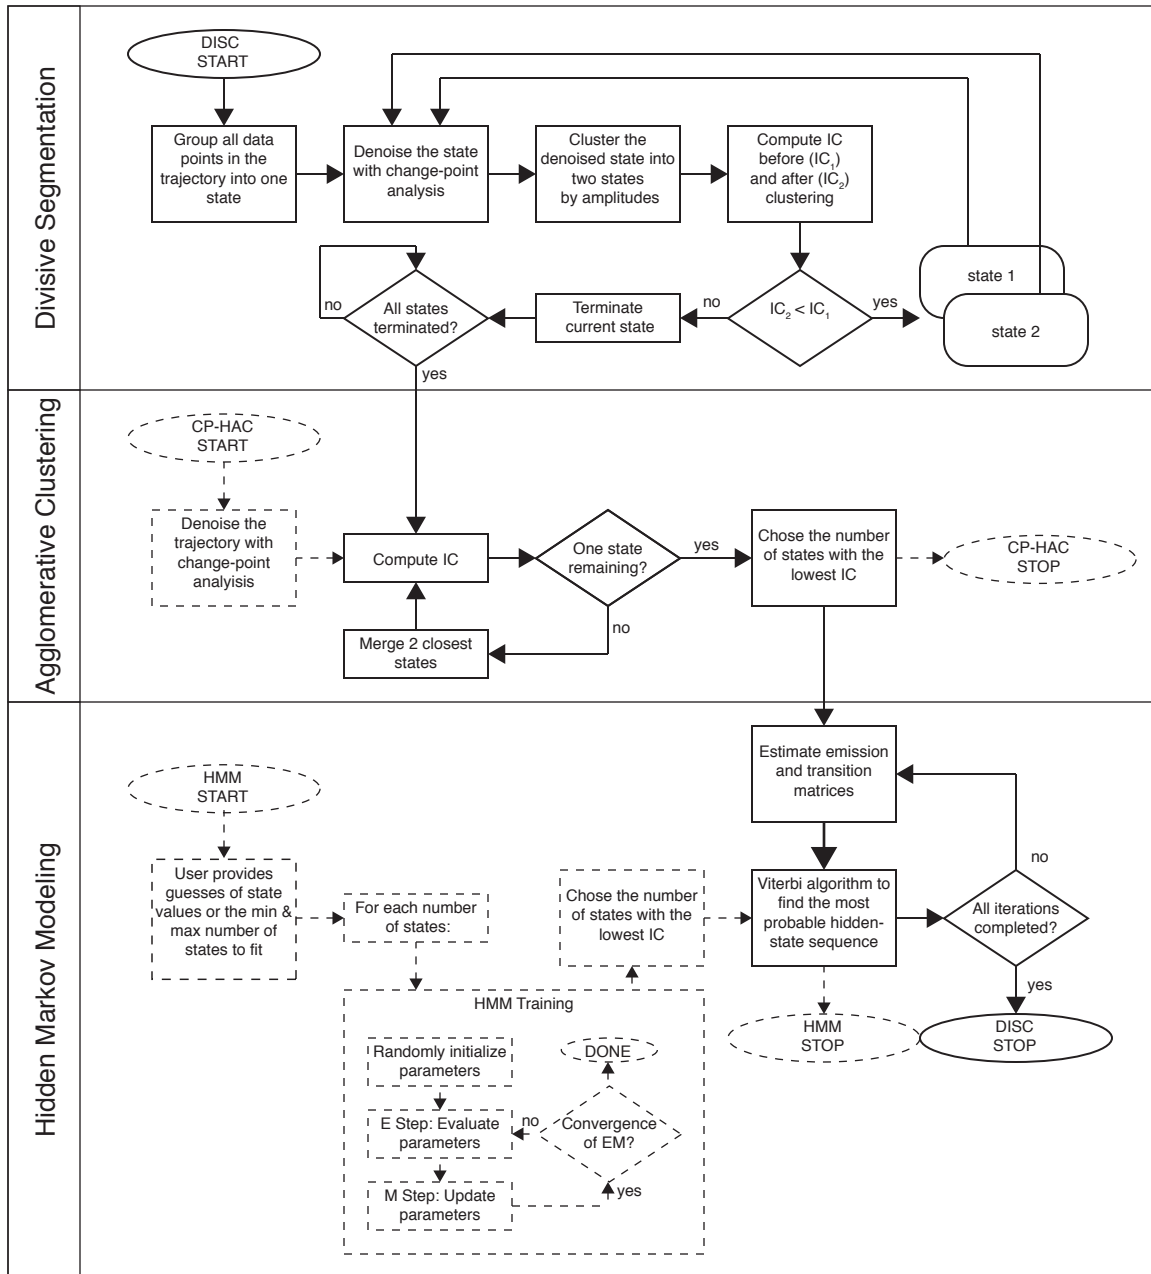

Figure 1-figure supplement 1

Supplement: supp [file elife-53357-supp-v1.zip]

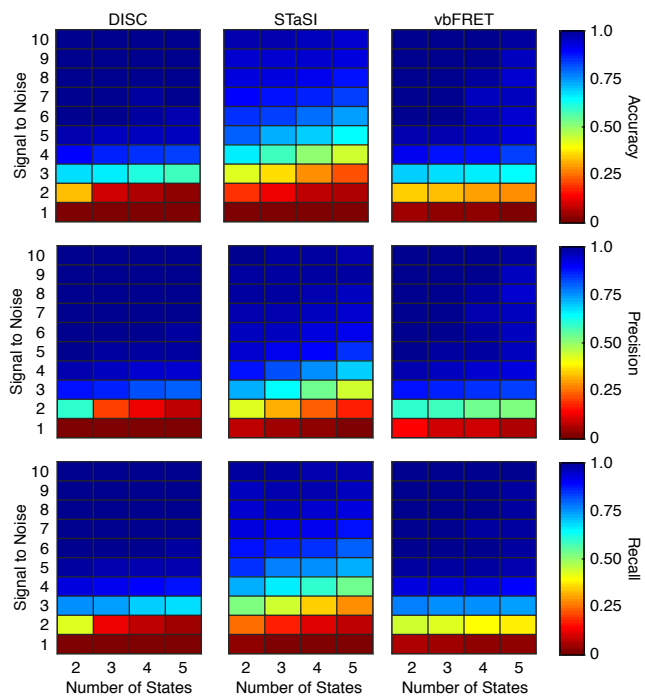

Figure 3-figure supplement 2

Supplement: supp [file elife-53357-supp-v1.zip]

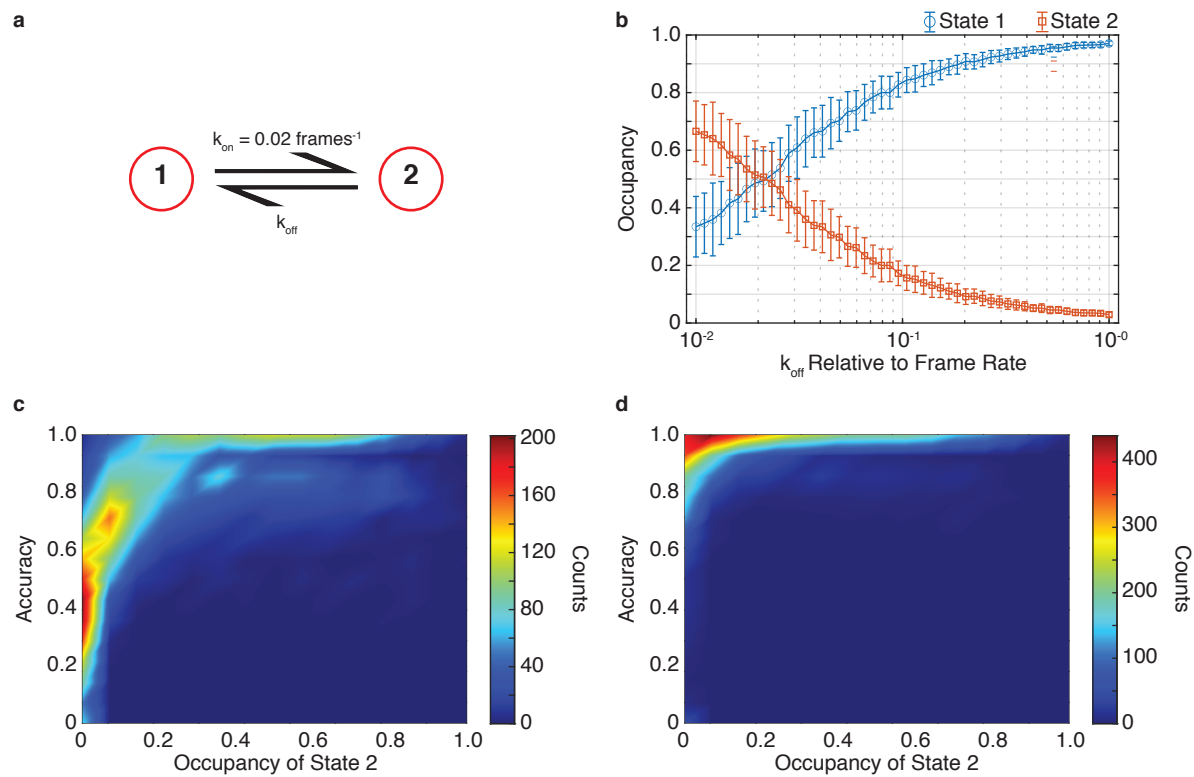

Figure 2-figure supplement 1

Supplement: supp [file elife-53357-supp-v1.zip]

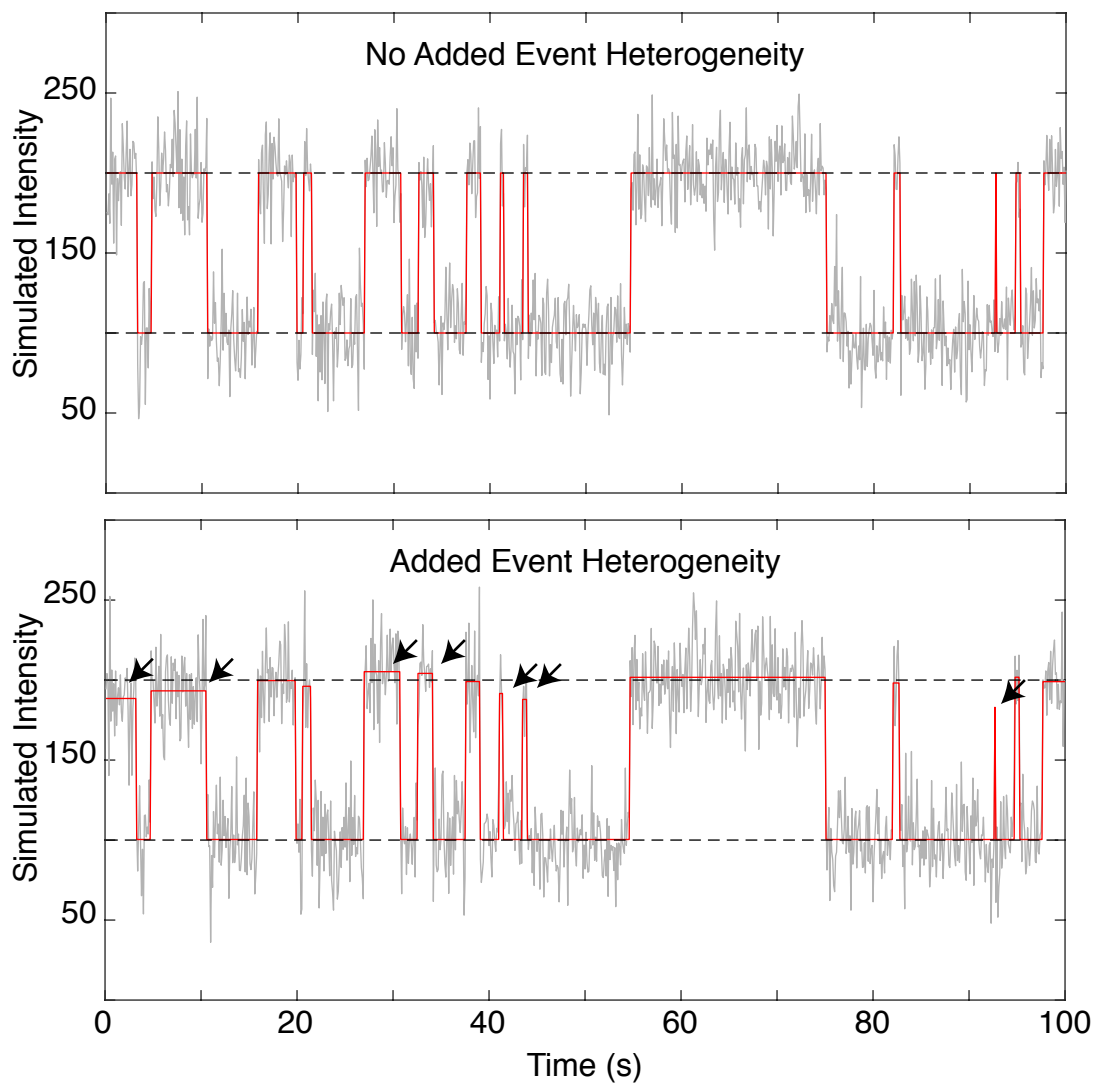

Figure 3-figure supplement 2

Supplement: supp [file elife-53357-supp-v1.zip]

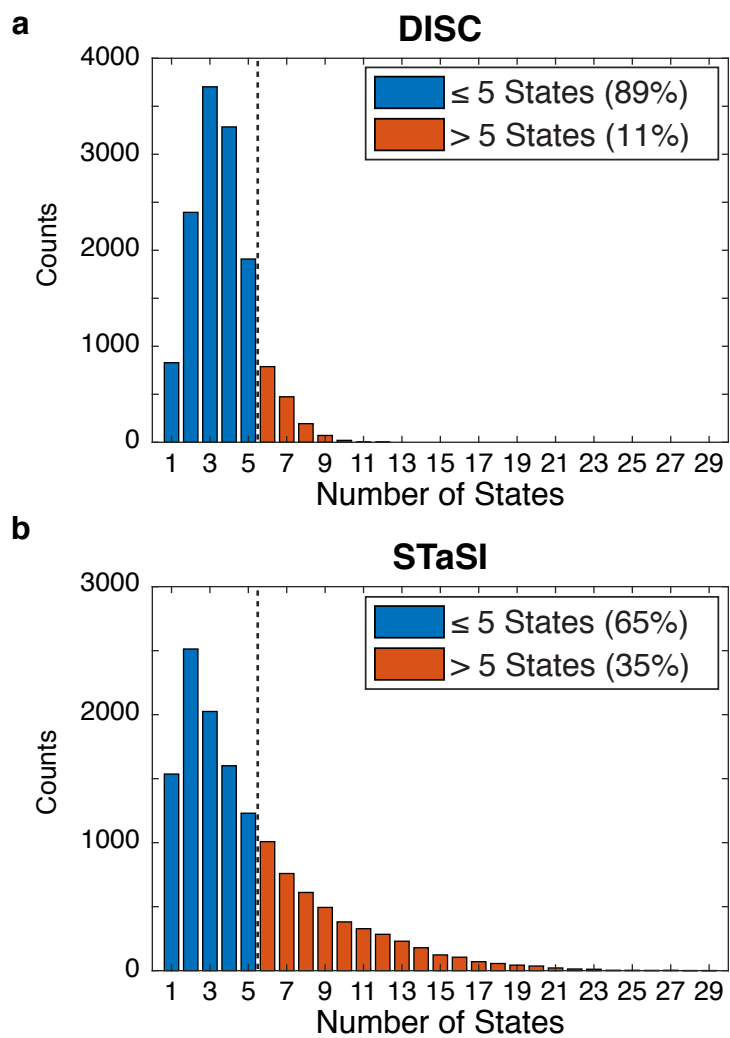

Figure 5-figure supplement 1

Supplement: supp [file elife-53357-supp-v1.zip › elife_poa_e53357_Figure_5_figure_supplement_1.pdf]

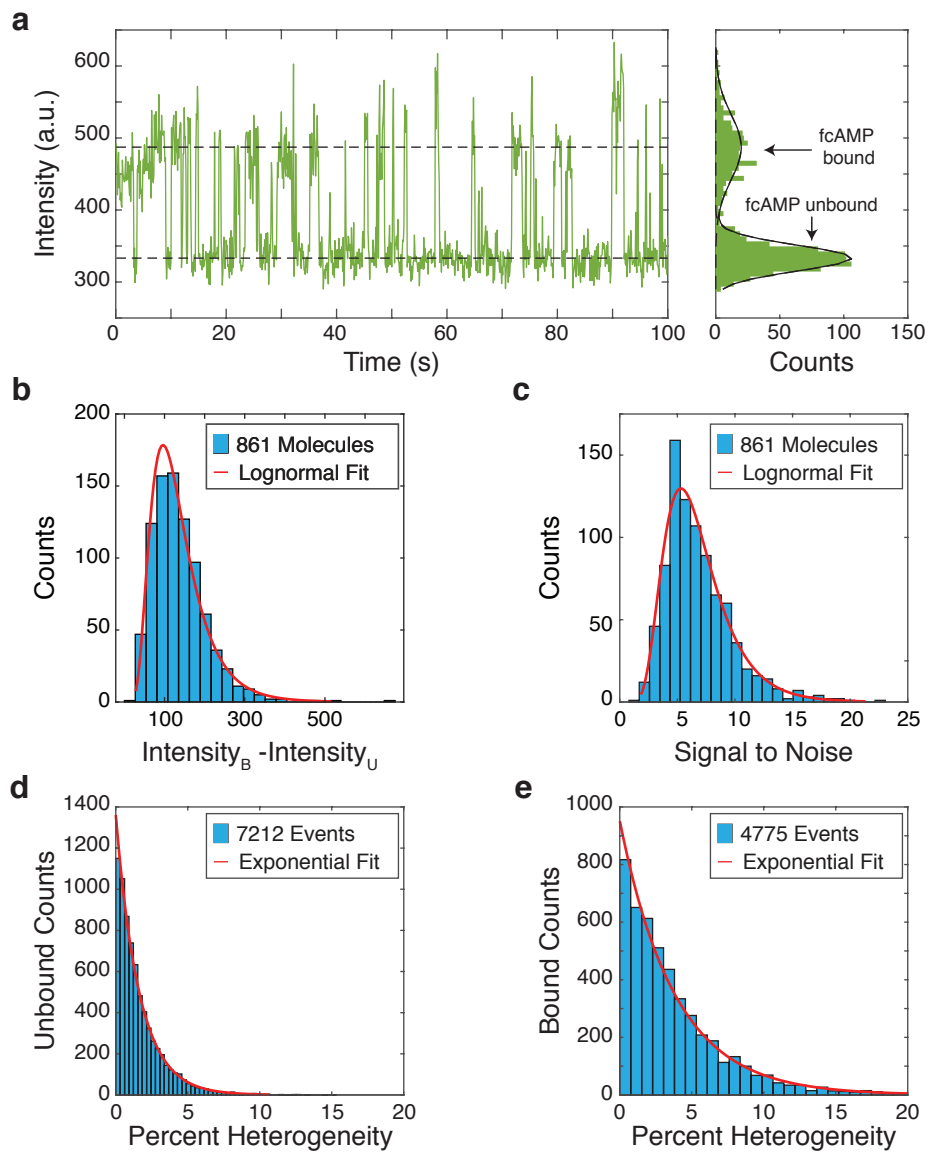

Figure 3-figure supplement 1

Supplement: supp [file elife-53357-supp-v1.zip › elife_poa_e53357_Figure_3_figure_supplement_1.pdf]

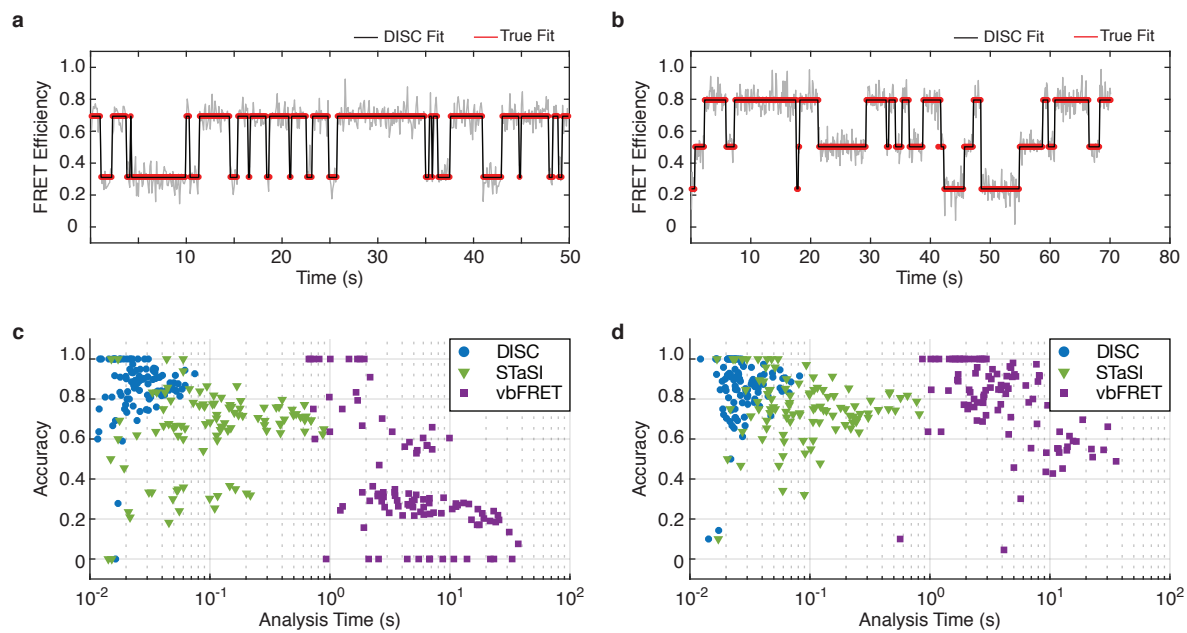

Figure 4-figure supplement 1

Supplement: supp [file elife-53357-supp-v1.zip › elife_poa_e53357_Figure_4_figure_supplement_1.pdf]
